# Supplementary material for: A Novel Feature Extraction Scheme with Ensemble Coding for Protein–Protein Interaction Prediction
Source: Int J Mol Sci. 2014 Jul 18;15(7):12731–49. doi: 10.3390/ijms150712731 (PMC4139871; doi:10.3390/ijms150712731)
Supplement: Supplementary File 1 [file ijms-15-12731-s001.zip › ijms-56787-supp-to be published/ijms-56787-supplementary-tables.xlsx]

## Sheet: Table S1 (A)
Table S1. (A) Gold Yeast
AC			CT			GAC			LD			MAC			NMBAC			EC
index	score		index	score		index	score		index	score		index	score		index	score		index	score
575	0.034446		567	0.046447		875	0.0392651		1078	0.121608		875	0.033109		635	0.102013		151	0.121608
635	0.0302401		338	0.0435895		695	0.0349702		448	0.119862		575	0.032258		125	0.0892618		152	0.119862
875	0.0293982		572	0.0419592		575	0.034912		889	0.105933		635	0.0308674		577	0.0868811		153	0.105933
515	0.0248523		343	0.0402063		635	0.0346763		259	0.101637		695	0.026948		581	0.0866455		751	0.102013
545	0.0225311		667	0.0375096		545	0.0267324		1204	0.0987216		545	0.0231916		584	0.0857857		154	0.101637
125	0.0219474		441	0.0358457		125	0.0254212		574	0.0952789		125	0.0218567		585	0.0852321		155	0.0987216
695	0.0205449		686	0.0324476		405	0.0216947		511	0.0946234		515	0.0217417		591	0.0849922		156	0.0952789
841	0.0192509		684	0.0298343		515	0.0216029		1141	0.085059		329	0.0215987		61	0.0848109		157	0.0946234
405	0.0177921		322	0.0298308		914	0.0187256		385	0.0800509		815	0.0200038		580	0.0847246		752	0.0892618
651	0.0170851		681	0.0286489		841	0.0183445		1015	0.07836		841	0.0182235		64	0.0845003		753	0.0868811
849	0.0166626		685	0.0276905		691	0.0179515		1089	0.077561		849	0.0173979		582	0.0844624		754	0.0866455
819	0.0161591		554	0.027467		871	0.0174853		637	0.0756002		691	0.0172856		574	0.0839456		755	0.0857857
565	0.0160181		651	0.0263021		915	0.0166512		459	0.0683421		565	0.0171383		595	0.0835755		756	0.0852321
870	0.0155735		539	0.0262388		35	0.0159596		7	0.0675617		871	0.0168325		590	0.0835493		158	0.085059
815	0.0153539		341	0.025863		365	0.0154078		322	0.0644049		821	0.0161573		68	0.083397		757	0.0849922
360	0.0150401		229	0.0241015		696	0.0153028		270	0.0637367		405	0.0161556		578	0.0833403		758	0.0848109
891	0.0149291		49	0.0218986		873	0.0145593		1215	0.0628252		651	0.0159982		63	0.0832378		759	0.0847246
871	0.0148215		644	0.0217922		65	0.0144249		1096	0.0620576		819	0.0157022		62	0.0827374		760	0.0845003
689	0.0146126		245	0.0215342		657	0.0142792		900	0.0617131		689	0.015223		589	0.0825414		761	0.0844624
915	0.0140893		602	0.021304		693	0.0137182		468	0.0616565		914	0.0143671		69	0.0824488		762	0.0839456
55	0.0138745		10	0.0212789		689	0.0136553		643	0.0607565		55	0.0142066		586	0.0823687		763	0.0835755
65	0.0137405		439	0.0204671		394	0.0136521		907	0.0599495		35	0.0140292		588	0.0823442		764	0.0835493
914	0.01362		98	0.0203515		331	0.0136489		890	0.0578312		891	0.0138976		573	0.0821467		765	0.083397
691	0.0133813		239	0.0201994		73	0.0135592		1205	0.057723		915	0.0137228		70	0.0819256		766	0.0833403
855	0.013354		553	0.0201895		404	0.0134868		70	0.0560945		299	0.0132218		596	0.0818374		767	0.0832378
299	0.0132895		308	0.0200122		694	0.0133225		952	0.055773		855	0.0131443		67	0.0816459		768	0.0827374
394	0.0132557		337	0.0196155		161	0.0130042		1098	0.0545843		365	0.013015		576	0.0815853		769	0.0825414
35	0.0126591		650	0.0194489		821	0.0129026		1079	0.0535461		331	0.012864		571	0.08139		770	0.0824488
901	0.0125854		301	0.0185922		271	0.0128383		1224	0.052775		870	0.0127664		579	0.0810544		771	0.0823687
329	0.0123926		670	0.0184249		849	0.0122795		1161	0.0523252		65	0.0127506		572	0.080807		772	0.0823442
591	0.0122709		224	0.0184166		282	0.0121965		1152	0.0514361		360	0.0125537		72	0.0805752		773	0.0821467
161	0.0120995		392	0.0183715		579	0.0117404		700	0.0511512		271	0.0123692		583	0.0805535		774	0.0819256
780	0.0119503		665	0.0180347		583	0.0116148		466	0.0490691		394	0.0120378		71	0.0805239		775	0.0818374
854	0.0118101		680	0.0179551		643	0.0113994		594	0.0477812		873	0.0119204		657	0.0804825		776	0.0816459
179	0.0117872		329	0.0175015		299	0.0111653		1026	0.0475304		339	0.0117469		85	0.0803729		777	0.0815853
747	0.0117746		393	0.0172721		815	0.0108668		1222	0.0474652		854	0.0117349		75	0.0798014		778	0.08139
331	0.0117573		156	0.0171614		179	0.0108582		694	0.0467151		119	0.0115876		592	0.0797906		779	0.0810544
491	0.0117346		646	0.0170151		876	0.0108043		585	0.0456916		747	0.0115224		587	0.0792317		780	0.080807
365	0.0117221		438	0.0169016		13	0.0107973		277	0.0452203		161	0.0113895		66	0.0792101		781	0.0805752
339	0.0115435		536	0.0168946		102	0.0106457		531	0.0451259		780	0.0113704		593	0.0791876		782	0.0805535
257	0.0114278		390	0.0167803		780	0.0106394		1159	0.0443097		901	0.0113675		79	0.0790596		783	0.0805239
119	0.0112292		23	0.0167129		901	0.0105185		648	0.0442647		491	0.0107588		78	0.0790355		784	0.0804825
309	0.0110765		586	0.0167068		925	0.0104166		133	0.0429036		561	0.0106533		81	0.0788701		785	0.0803729
561	0.0110298		674	0.0164975		909	0.0103762		1033	0.0421578		591	0.0106077		599	0.078802		159	0.0800509
873	0.0103733		672	0.016463		601	0.0102709		972	0.0414667		711	0.0105709		594	0.0785317		786	0.0798014
904	0.0103702		294	0.0163577		211	0.0102366		529	0.0413199		257	0.0105391		598	0.0783379		787	0.0797906
271	0.0103635		196	0.0161607		55	0.0101368		763	0.041292		309	0.0102455		74	0.0781822		788	0.0792317
711	0.0102369		550	0.015795		922	0.0101083		701	0.0412564		85	0.0102336		80	0.0780038		789	0.0792101
118	0.0101845		504	0.0157813		565	0.00999514		13	0.0411457		179	0.010229		76	0.0778909		790	0.0791876
531	0.0100312		466	0.0156227		910	0.00994578		1016	0.0401722		601	0.0102077		65	0.0777582		791	0.0790596
300	0.00944639		193	0.0155514		481	0.00988309		1142	0.0399882		73	0.0100927		89	0.0771498		792	0.0790355
764	0.00940096		508	0.0153592		792	0.00984708		1198	0.0399214		693	0.00985628		77	0.0771053		793	0.0788701
481	0.00939213		46	0.0152814		879	0.00983193		396	0.0397999		579	0.00976652		90	0.0767588		794	0.078802
73	0.00931046		544	0.0152448		639	0.00976463		196	0.038943		211	0.00971184		597	0.0766066		795	0.0785317
579	0.00926749		660	0.0152036		904	0.00974003		18	0.0388982		118	0.00969674		575	0.0766008		160	0.07836
693	0.00915086		371	0.0151099		403	0.00955328		941	0.0388417		904	0.00966615		600	0.0762533		796	0.0783379
85	0.00898633		246	0.0150928		636	0.00952459		279	0.0384406		481	0.00933954		82	0.0761862		797	0.0781822
909	0.00880508		345	0.0148559		549	0.00941896		267	0.0377976		300	0.00931208		86	0.0759901		798	0.0780038
809	0.00867155		514	0.0145026		781	0.00923485		342	0.0376714		531	0.00931044		83	0.0759109		799	0.0778909
337	0.00866441		659	0.0144417		133	0.00921438		522	0.0370693		781	0.00920238		632	0.0754754		800	0.0777582
808	0.00859352		534	0.0143445		883	0.00920447		1035	0.0368567		696	0.00915836		73	0.0749254		161	0.077561
13	0.00837538		51	0.0139586		819	0.00909782		25	0.0365602		754	0.00914763		87	0.0743263		801	0.0771498
404	0.00827138		571	0.0139332		671	0.00902481		1009	0.0365173		258	0.00904851		88	0.0742361		802	0.0771053
282	0.00816968		538	0.0138175		339	0.00896792		405	0.0360334		655	0.00896985		84	0.0739563		803	0.0767588
298	0.00802564		171	0.0137313		747	0.00894445		592	0.03422		305	0.00888341		647	0.0738638		804	0.0766066
120	0.0080209		537	0.0131379		126	0.00882575		895	0.0339393		583	0.00885474		636	0.0733365		805	0.0766008
583	0.00796618		574	0.0131147		627	0.00881854		655	0.033563		328	0.00881868		643	0.0732226		806	0.0762533
335	0.00792368		351	0.0130806		491	0.00875783		693	0.0332092		282	0.00878121		815	0.0726942		807	0.0761862
655	0.00791138		436	0.0127937		795	0.00865463		456	0.0331484		120	0.00874681		819	0.0707375		808	0.0759901
576	0.00790422		420	0.0125537		667	0.00854451		1206	0.0330746		102	0.00871211		639	0.0697898		809	0.0759109
754	0.00790333		427	0.0122319		462	0.00851782		1200	0.033064		337	0.00851604		631	0.0659138		162	0.0756002
537	0.00785116		99	0.0121951		576	0.00844067		610	0.0329562		909	0.00846934		126	0.0655811		810	0.0754754
619	0.00781718		324	0.0121716		257	0.00843573		153	0.0329177		463	0.00842568		122	0.0630348		811	0.0749254
910	0.00779058		358	0.0118648		791	0.00839553		909	0.0328377		764	0.00827217		638	0.0629275		812	0.0743263
601	0.00770819		452	0.0118219		272	0.00834701		963	0.0328173		694	0.00820573		133	0.0629094		813	0.0742361
799	0.00770427		342	0.0117238		424	0.00833861		718	0.0321417		404	0.00811066		123	0.0619945		814	0.0739563
991	0.00769498		15	0.0116916		754	0.00805302		948	0.0319684		910	0.00801422		812	0.0618869		815	0.0738638
258	0.00768998		161	0.0115824		258	0.00803804		1135	0.0319661		269	0.00800503		648	0.061524		816	0.0733365
51	0.00768085		583	0.0115214		699	0.00801286		883	0.0319569		839	0.00799728		646	0.0615069		817	0.0732226
18	0.00766172		335	0.0114905		171	0.0078812		27	0.0309845		13	0.00799654		121	0.0603793		818	0.0726942
595	0.00758743		669	0.0114534		537	0.00778968		311	0.0306242		809	0.00789582		642	0.0598563		819	0.0707375
463	0.00753469		150	0.01141		612	0.00778174		81	0.0304174		657	0.00783434		653	0.0596676		820	0.0697898
767	0.00752397		423	0.0110914		799	0.00773967		265	0.0301563		335	0.00781425		654	0.0595783		163	0.0683421
272	0.00746782		123	0.0110473		591	0.00769459		340	0.0300987		18	0.00779635		634	0.0592106		164	0.0675617
211	0.00746441		243	0.0110101		401	0.0076739		1190	0.0297693		595	0.00774219		633	0.0587209		821	0.0659138
922	0.00744048		352	0.0109616		541	0.00767299		1143	0.0296662		505	0.00766472		132	0.0573845		822	0.0655811
102	0.00743156		493	0.0109251		531	0.00766051		1137	0.0295539		272	0.0076593		814	0.0571746		165	0.0644049
632	0.0073566		9	0.0109034		767	0.00762029		1090	0.0295498		298	0.0076575		828	0.057013		166	0.0637367
925	0.00726092		410	0.0108182		991	0.00755508		1072	0.0293731		991	0.00758925		816	0.0566977		823	0.0630348
792	0.00714331		666	0.0107516		785	0.00744391		1191	0.0292241		541	0.00758811		640	0.0563791		824	0.0629275
848	0.0070968		295	0.0107468		85	0.00744107		759	0.0289758		619	0.00736864		147	0.0562667		825	0.0629094
772	0.00708401		406	0.0107181		855	0.00737464		638	0.0289203		537	0.0073643		660	0.0556252		167	0.0628252
671	0.00701983		353	0.0106509		764	0.00730802		826	0.0288403		462	0.00735335		641	0.0555179		168	0.0620576
541	0.00697107		28	0.0105914		119	0.0072858		1084	0.0288064		767	0.00732685		820	0.0553077		826	0.0619945
722	0.00694467		287	0.0105855		891	0.00727891		1074	0.0285928		922	0.00724326		146	0.055193		827	0.0618869
657	0.00688849		166	0.0105785		651	0.00724166		654	0.0284517		576	0.00715531		649	0.0548367		169	0.0617131
751	0.00687466		424	0.0104944		91	0.00721212		1207	0.028399		145	0.00710855		144	0.0548205		170	0.0616565
505	0.00684441		317	0.0104315		817	0.00717444		403	0.027744		772	0.0070601		137	0.0542375		828	0.061524
29	0.00681732		389	0.0104211		854	0.00716579		1211	0.0276576		636	0.00701998		813	0.0532387		829	0.0615069
781	0.00673897		252	0.0103916		305	0.00712448		1148	0.0273649		876	0.00700447		136	0.0529769		171	0.0607565
269	0.00673186		523	0.0103278		611	0.0070746		774	0.0270095		925	0.00697822		832	0.052612		830	0.0603793
705	0.00669465		637	0.0103121		360	0.00705717		846	0.0267039		549	0.00695499		837	0.052553		172	0.0599495
628	0.00665785		67	0.0102401		837	0.00702837		256	0.0266573		671	0.00692957		827	0.052488		831	0.0598563
795	0.00663707		468	0.0102099		918	0.00699132		752	0.0261894		848	0.00687257		140	0.0523802		832	0.0596676
810	0.00661915		434	0.0101731		632	0.00689831		15	0.0259953		91	0.00683401		822	0.0521113		833	0.0595783
171	0.00656242		498	0.0101534		702	0.00683113		454	0.0259233		667	0.00675173		652	0.0520693		834	0.0592106
696	0.00650684		551	0.0101327		786	0.00681617		711	0.0258287		627	0.00669651		833	0.0520136		835	0.0587209
5	0.00644472		387	0.0100554		97	0.00677416		959	0.0255694		792	0.0066702		818	0.0514165		173	0.0578312
391	0.00638204		323	0.00989818		647	0.00675659		547	0.0253719		799	0.00661923		658	0.0509605		174	0.057723
145	0.00636737		630	0.00974426		300	0.0067344		1216	0.0253555		639	0.00657016		838	0.0498077		836	0.0573845
636	0.00633938		84	0.00972617		335	0.00672604		306	0.0253472		808	0.00652478		650	0.0492258		837	0.0571746
521	0.00629976		44	0.00967488		801	0.00668002		495	0.0253033		416	0.00651278		645	0.0491899		838	0.057013
884	0.0062667		110	0.00948419		186	0.0066335		892	0.0249962		311	0.00645451		831	0.0489017		839	0.0566977
801	0.00621722		8	0.00947779		237	0.00662667		445	0.0248948		521	0.00639892		309	0.0488001		840	0.0563791
34	0.00616114		60	0.00946865		619	0.00662347		260	0.0245317		126	0.00629047		830	0.0484771		841	0.0562667
126	0.00608065		36	0.00945238		250	0.00655194		1080	0.0244815		664	0.0062749		834	0.0480817		175	0.0560945
876	0.00602914		635	0.00941645		874	0.00650007		500	0.0244677		705	0.00625171		138	0.0475646		176	0.055773
842	0.00598361		400	0.00926928		660	0.00636319		449	0.0244648		884	0.00621769		825	0.0473695		842	0.0556252
549	0.00597622		65	0.00925086		463	0.00629619		954	0.0240933		795	0.00621241		811	0.0473269		843	0.0555179
344	0.00593009		588	0.00924906		178	0.0062865		783	0.0240507		842	0.00615833		129	0.0468345		844	0.0553077
462	0.00584223		429	0.00915047		337	0.00628394		609	0.0238167		29	0.00614808		656	0.0465346		845	0.055193
627	0.00583572		95	0.00914836		185	0.00627746		1081	0.023804		108	0.00612527		143	0.046187		846	0.0548367
571	0.00574726		307	0.00898576		5	0.00624765		689	0.0237346		837	0.00609736		840	0.0456294		847	0.0548205
785	0.00574335		662	0.00894842		553	0.00623979		59	0.0237197		632	0.0060308		823	0.0448918		177	0.0545843
639	0.00572746		525	0.00893153		412	0.00619116		1011	0.0234642		643	0.00594441		829	0.0447437		848	0.0542375
403	0.0057122		394	0.00886312		916	0.0061902		799	0.0233674		51	0.00592863		826	0.0442687		178	0.0535461
167	0.00566069		585	0.00873504		373	0.006187		575	0.0233337		167	0.00588506		148	0.04389		849	0.0532387
91	0.00564725		595	0.00859348		505	0.00617811		444	0.0231885		385	0.00585247		142	0.0438193		850	0.0529769
431	0.00563869		303	0.00856042		664	0.0061492		518	0.0231271		751	0.00581964		139	0.0437759		179	0.052775
328	0.00559637		440	0.00846056		279	0.00613995		54	0.0230075		810	0.00573001		824	0.0431348		851	0.052612
861	0.0055919		648	0.00841785		675	0.00610921		798	0.022868		812	0.00572968		131	0.0424981		852	0.052553
332	0.00559168		24	0.00827437		399	0.00605095		570	0.0228487		801	0.00567347		135	0.0423889		853	0.052488
493	0.0055114		280	0.0081762		809	0.00603028		1002	0.022801		171	0.00566013		305	0.0421884		854	0.0523802
612	0.00549348		582	0.00813467		680	0.00597402		358	0.0227556		424	0.00565454		835	0.0419561		180	0.0523252
821	0.0053608		2	0.00811952		234	0.0059073		1018	0.0226711		612	0.00560929		150	0.0416216		855	0.0521113
108	0.00532715		71	0.0080515		921	0.00583449		1130	0.0226187		178	0.00560428		127	0.0414331		856	0.0520693
516	0.0053115		35	0.00800774		561	0.00580739		1240	0.0225931		10	0.00558145		134	0.0413462		857	0.0520136
680	0.00527096		546	0.00793189		703	0.00579777		1051	0.0225475		879	0.00556695		303	0.0413011		181	0.0514361
524	0.00525289		288	0.00791505		398	0.00578781		703	0.0225123		97	0.00554007		644	0.0412987		858	0.0514165
817	0.00520009		74	0.00777423		43	0.00577562		388	0.0225092		346	0.00549614		124	0.0412145		182	0.0511512
997	0.00518857		212	0.00777234		298	0.00577063		450	0.0223913		344	0.0054817		817	0.0409629		859	0.0509605
643	0.00516221		565	0.00775723		309	0.00576218		657	0.0223118		361	0.00546587		304	0.0398338		860	0.0498077
141	0.00515775		97	0.00775062		882	0.00567536		582	0.0222924		308	0.0054635		821	0.0393093		861	0.0492258
859	0.00515433		327	0.00771722		772	0.00565388		3	0.0222811		403	0.00544701		637	0.0390864		862	0.0491899
416	0.00512307		259	0.00765004		605	0.00562866		1085	0.0222775		316	0.0053922		659	0.0383249		183	0.0490691
305	0.00506361		326	0.00754391		66	0.00553634		255	0.0221435		5	0.00536342		836	0.0382867		863	0.0489017
667	0.00505572		331	0.00751994		546	0.0054994		581	0.0220414		516	0.00533896		839	0.0380374		864	0.0488001
740	0.00503479		194	0.00742951		414	0.00548746		329	0.0220134		856	0.00532174		312	0.035863		865	0.0484771
10	0.00502995		155	0.00739735		277	0.00548524		576	0.0219017		391	0.00526923		306	0.0351744		866	0.0480817
401	0.00500827		597	0.00738946		782	0.00544527		1017	0.021618		725	0.00522086		301	0.0345847		184	0.0477812
791	0.00498274		182	0.00728082		929	0.00544426		67	0.0215964		235	0.00521473		323	0.0337622		867	0.0475646
631	0.00490196		408	0.00724776		118	0.00541143		484	0.0214413		816	0.00521		128	0.0333138		185	0.0475304
812	0.00488949		591	0.00716362		789	0.00540693		887	0.0214203		524	0.00514777		655	0.0332873		186	0.0474652
385	0.00488379		306	0.00715882		202	0.0054044		1144	0.0213638		782	0.0051402		167	0.0332593		868	0.0473695
879	0.0048662		211	0.00715435		521	0.00538172		831	0.0213144		817	0.00510716		141	0.0332211		869	0.0473269
846	0.00484637		632	0.00712315		311	0.00534932		1239	0.0212351		791	0.005088		130	0.0328796		870	0.0468345
303	0.00480145		453	0.00707187		631	0.00530289		34	0.0209974		493	0.00503146		317	0.032516		187	0.0467151
95	0.00479588		365	0.00700828		269	0.00528718		561	0.0207356		785	0.00499558		310	0.0321878		871	0.0465346
725	0.00479367		63	0.00699145		595	0.00524506		970	0.0207229		628	0.00498969		318	0.032131		301	0.046447
359	0.00476729		509	0.00695255		361	0.00523279		451	0.0206965		631	0.0049188		302	0.0319976		872	0.046187
664	0.0047634		564	0.00682741		571	0.00521646		507	0.0206698		571	0.00485904		149	0.0319768		188	0.0456916
81	0.00476101		517	0.00681969		606	0.0051709		460	0.0205912		861	0.00479716		313	0.0317445		873	0.0456294
694	0.00475363		72	0.00678755		391	0.0051684		1001	0.0204985		629	0.00474606		176	0.0315009		189	0.0452203
782	0.00475154		683	0.00676835		157	0.00514861		512	0.0204242		332	0.00470717		151	0.0308252		190	0.0451259
623	0.00470034		56	0.00674302		366	0.00513088		698	0.0197743		186	0.00465501		164	0.0305023		874	0.0448918
226	0.00469411		181	0.00672918		842	0.00511761		421	0.0197463		918	0.00464943		320	0.0302844		875	0.0447437
856	0.0046129		174	0.0067124		808	0.0051163		571	0.019738		997	0.0046054		321	0.0302451		191	0.0443097
918	0.00461247		96	0.00662308		516	0.00505279		1153	0.0196929		421	0.00458604		169	0.0294825		876	0.0442687
38	0.00461202		50	0.00661351		587	0.00503655		318	0.0195884		401	0.00455349		175	0.0294651		192	0.0442647
510	0.00459865		203	0.00657963		751	0.00494224		214	0.0195431		752	0.00452055		159	0.0292169		877	0.04389
868	0.00455665		568	0.0065471		719	0.00494149		964	0.0194855		675	0.00447522		307	0.0289386		878	0.0438193
584	0.00455302		649	0.00648132		214	0.00493606		797	0.0194283		611	0.00444696		327	0.0287595		879	0.0437759
216	0.00452088		170	0.00635109		421	0.00491359		1114	0.0190759		623	0.00443692		173	0.0286395		302	0.0435895
361	0.00447028		395	0.00632617		108	0.00487795		55	0.0190353		722	0.00442163		172	0.0286118		880	0.0431348
399	0.00445497		641	0.00626112		557	0.0048738		382	0.0189831		895	0.00442013		152	0.0284879		193	0.0429036
346	0.00444247		22	0.00623209		812	0.00482514		261	0.0189541		66	0.00440609		177	0.0284331		881	0.0424981
370	0.00444207		645	0.00619844		870	0.0048233		577	0.018862		185	0.00432546		174	0.0283484		882	0.0423889
629	0.00442532		167	0.006177		681	0.0047434		1193	0.0187433		157	0.00429515		163	0.0282814		883	0.0421884
178	0.00441406		503	0.00616838		597	0.00466432		645	0.0187213		224	0.00428765		145	0.0282513		194	0.0421578
519	0.0044107		671	0.00613369		586	0.004653		78	0.018699		584	0.00427665		324	0.0282193		303	0.0419592
424	0.004399		242	0.00604833		725	0.00462619		295	0.0186984		846	0.00424118		154	0.0282087		884	0.0419561
66	0.0043673		64	0.00599141		332	0.00458504		1050	0.0185655		786	0.00419722		651	0.0279169		885	0.0416216
828	0.00436019		398	0.00598287		308	0.00455652		775	0.0185116		883	0.00416405		170	0.0276951		195	0.0414667
916	0.00435108		270	0.00589991		573	0.00450408		901	0.0183944		1002	0.00415913		168	0.0276851		886	0.0414331
630	0.00432991		497	0.00587708		18	0.00449093		756	0.0182869		740	0.00414468		156	0.0274189		887	0.0413462
726	0.00429382		299	0.00586425		95	0.00448384		649	0.0182112		726	0.00414127		153	0.0273666		196	0.0413199
605	0.00427887		445	0.00575173		924	0.00446243		357	0.0181986		597	0.00410607		158	0.0273523		888	0.0413011
845	0.00427561		265	0.00574266		430	0.00445884		379	0.0181447		874	0.00409625		315	0.0272957		889	0.0412987
803	0.00425845		678	0.00573963		275	0.00444991		20	0.0180546		863	0.00408096		311	0.0272267		197	0.041292
964	0.00425447		366	0.00573128		794	0.0044485		781	0.01803		546	0.00406697		330	0.0270069		198	0.0412564
786	0.00424796		500	0.00560593		123	0.00444296		1202	0.0179979		133	0.00405735		180	0.0267359		890	0.0412145
611	0.00423463		600	0.00559198		76	0.00444094		1027	0.0179345		630	0.0040445		319	0.0267124		199	0.0411457
97	0.00421241		131	0.00553553		807	0.00442593		965	0.0178075		704	0.00399603		314	0.0265545		891	0.0409629
902	0.00416643		348	0.00553425		653	0.00440236		455	0.0177865		519	0.00398161		162	0.0265197		304	0.0402063
869	0.00399628		643	0.00550331		120	0.00437166		1022	0.017758		680	0.00396439		166	0.0264976		200	0.0401722
237	0.0039642		201	0.00545938		400	0.00435709		685	0.0177574		216	0.00395668		325	0.0262794		201	0.0399882
224	0.00393951		589	0.00536569		919	0.00433146		953	0.0175082		510	0.00394166		160	0.0261658		202	0.0399214
194	0.00389165		367	0.00535522		638	0.00425625		64	0.017467		181	0.00393844		165	0.0261464		892	0.0398338
456	0.00387321		470	0.00534811		552	0.0042286		914	0.0173483		916	0.00392896		322	0.0261422		203	0.0397999
1002	0.00383399		379	0.0052907		510	0.00417797		169	0.0172997		431	0.00390336		157	0.0260543		893	0.0393093
517	0.00381238		563	0.0052488		519	0.00415656		60	0.0172709		250	0.00387755		155	0.0259682		601	0.0392651
421	0.00378676		369	0.0052482		51	0.00408349		73	0.0172473		833	0.00387663		316	0.0254499		894	0.0390864
681	0.00378569		625	0.0052466		382	0.0040762		912	0.0171913		803	0.00383295		326	0.0253468		204	0.038943
895	0.00377838		621	0.00523715		458	0.00402749		897	0.0171908		573	0.0038315		171	0.0247618		205	0.0388982
392	0.00377716		87	0.0051524		735	0.00401079		1095	0.017136		228	0.00380436		178	0.0247402		206	0.0388417
130	0.00376782		485	0.00515165		900	0.00397455		825	0.0170294		999	0.00377708		308	0.0232971		207	0.0384406
223	0.00372827		108	0.00511791		917	0.00397302		523	0.0169939		359	0.00376562		405	0.0227098		895	0.0383249
355	0.00371668		316	0.00510557		567	0.00394908		386	0.0169908		868	0.00375216		875	0.0226698		896	0.0382867
883	0.00371648		399	0.00502512		646	0.00393196		1086	0.0168822		605	0.00370724		161	0.0224169		897	0.0380374
704	0.00371497		11	0.00502502		720	0.00391052		885	0.0168419		223	0.0037034		179	0.0220852		208	0.0377976
957	0.00369615		451	0.00501814		752	0.00390859		1049	0.0167999		270	0.00369316		711	0.0207996		209	0.0376714
152	0.00368031		138	0.00493986		167	0.00389708		634	0.0166892		366	0.00368515		328	0.0207684		305	0.0375096
597	0.00366395		292	0.00493767		132	0.00389596		1101	0.0166281		237	0.00367052		545	0.0197965		210	0.0370693
752	0.00364841		102	0.00485414		570	0.00388436		397	0.0165907		214	0.00366404		211	0.0194009		211	0.0368567
428	0.00363689		240	0.0047988		224	0.00388426		151	0.0165827		977	0.00365346		740	0.0189043		212	0.0365602
934	0.00362309		275	0.00477587		726	0.00387115		822	0.0165739		860	0.00364713		705	0.0185059		213	0.0365173
921	0.00360625		147	0.00473512		934	0.00385259		1076	0.0165349		123	0.00363265		721	0.0183844		214	0.0360334
945	0.00359669		411	0.00471555		524	0.00383805		333	0.0165108		141	0.00361342		663	0.0178087		898	0.035863
734	0.0035593		463	0.00468455		316	0.00383774		720	0.0165091		194	0.0035727		669	0.0175732		306	0.0358457
92	0.00353589		460	0.00468453		913	0.00381814		906	0.0164287		734	0.00357245		734	0.0173528		899	0.0351744
381	0.00351729		263	0.00466246		578	0.00381587		1139	0.0164123		381	0.00356602		741	0.01731		602	0.0349702
275	0.00351258		195	0.00457843		146	0.00379957		393	0.0162667		805	0.00355766		394	0.0172802		603	0.034912
122	0.00350469		57	0.0045556		848	0.0037675		513	0.0161889		644	0.00354294		662	0.0172726		604	0.0346763
398	0.00349443		31	0.0045191		147	0.00375906		913	0.0161678		277	0.00352639		746	0.0169884		900	0.0345847
133	0.00349317		472	0.00450881		788	0.00375569		843	0.0160816		398	0.00348114		723	0.0169539		1	0.034446
506	0.00348311		518	0.00450617		908	0.00375177		517	0.0160793		859	0.00347547		665	0.0168449		215	0.03422
644	0.00347944		279	0.00438973		810	0.00372646		294	0.0160542		517	0.00346593		750	0.0166923		216	0.0339393
744	0.00345425		78	0.00437377		493	0.00367756		546	0.0160441		81	0.00346329		727	0.0163664		217	0.033563
949	0.00342171		677	0.00436715		329	0.00366786		796	0.0160375		807	0.00345497		914	0.0162497		218	0.0332092
661	0.00342133		562	0.00434175		828	0.00366533		192	0.0160118		399	0.00345258		668	0.016214		219	0.0331484
153	0.00339508		202	0.00433884		10	0.00364682		1113	0.0160079		927	0.00343619		329	0.0161181		451	0.033109
637	0.003384		100	0.00432908		517	0.00364587		514	0.0159904		934	0.00343615		915	0.0161029		220	0.0330746
805	0.00338353		443	0.00432739		543	0.00363262		1067	0.0158595		949	0.00343147		235	0.0160421		221	0.033064
546	0.00337019		267	0.00432407		722	0.00358892		580	0.0158428		681	0.00342609		901	0.0153693		222	0.0329562
308	0.00336417		361	0.00431229		223	0.00358414		88	0.0158147		959	0.00342034		732	0.0152806		223	0.0329177
336	0.00335943		435	0.00427894		153	0.00354975		687	0.0157912		744	0.0034197		673	0.0152759		224	0.0328377
807	0.00335441		530	0.00427418		92	0.0035493		519	0.0157598		153	0.00340322		194	0.015221		225	0.0328173
70	0.003341		570	0.00418225		800	0.00354801		202	0.0157185		836	0.00336509		676	0.0151409		307	0.0324476
587	0.00333956		425	0.00415834		930	0.00350796		910	0.0155461		853	0.0033635		491	0.0150542		452	0.032258
270	0.00333544		362	0.00414308		744	0.00349597		280	0.0154626		43	0.00334862		687	0.0149941		226	0.0321417
929	0.00332994		432	0.00411745		548	0.00348862		586	0.0154597		279	0.00334847		214	0.0148934		227	0.0319684
157	0.00324414		124	0.00408732		181	0.00347297		1126	0.0153146		956	0.00332022		729	0.0148735		228	0.0319661
128	0.00320773		547	0.00408656		347	0.00341186		420	0.0153056		34	0.00331034		224	0.014871		229	0.0319569
836	0.00317531		471	0.00407147		615	0.00339981		286	0.0152362		456	0.00330684		745	0.014862		230	0.0309845
977	0.00315593		254	0.00401173		1002	0.0033879		475	0.0152209		902	0.0033015		672	0.0148183		453	0.0308674
606	0.00314583		191	0.00395972		193	0.00335409		262	0.0151694		205	0.00329981		661	0.0146374		231	0.0306242
123	0.00310902		261	0.00395814		997	0.0033218		815	0.01503		78	0.00328943		748	0.0146187		232	0.0304174
482	0.00309078		230	0.00391834		977	0.00328906		328	0.0150002		226	0.00328393		674	0.0146103		2	0.0302401
40	0.00308768		137	0.00390171		136	0.00328478		307	0.0149785		355	0.00326227		670	0.0145472		233	0.0301563
863	0.00307326		679	0.00388665		733	0.00327607		886	0.0149518		789	0.00325083		686	0.0144539		234	0.0300987
417	0.00305594		255	0.00385981		698	0.00326235		387	0.0148803		929	0.00321845		677	0.0142804		308	0.0298343
953	0.00305573		168	0.00384802		600	0.00325298		765	0.0147695		370	0.0032167		666	0.0141551		309	0.0298308
880	0.00304872		107	0.00373696		972	0.00324802		43	0.0147127		95	0.00321391		682	0.0139829		235	0.0297693
853	0.00304676		175	0.00371846		655	0.00322524		764	0.014703		506	0.00318654		205	0.0139405		236	0.0296662
277	0.00304118		145	0.00370033		897	0.00321235		203	0.01469		417	0.00317327		742	0.0139239		237	0.0295539
999	0.00303775		114	0.00363514		1007	0.0031842		372	0.0145808		721	0.00315932		236	0.0138617		238	0.0295498
860	0.00301573		112	0.00362528		803	0.00318262		891	0.0145578		336	0.00315708		679	0.013828		3	0.0293982
535	0.00299835		601	0.0036183		711	0.00317328		168	0.0145146		92	0.00312987		704	0.0137187		239	0.0293731
927	0.00298993		53	0.0036122		793	0.00316571		770	0.0144247		553	0.00312907		210	0.0137183		240	0.0292241
688	0.00297572		88	0.00359963		29	0.00314496		795	0.0143648		342	0.00311935		664	0.0136941		241	0.0289758
539	0.00296066		148	0.00359822		352	0.0031239		216	0.0143282		699	0.00310009		667	0.0136809		242	0.0289203
121	0.00296008		58	0.0035965		692	0.00311441		1214	0.0142685		921	0.00308778		228	0.0136538		243	0.0288403
908	0.002946		476	0.00358388		241	0.00310888		945	0.0141774		964	0.00304275		219	0.0136532		244	0.0288064
941	0.00293727		55	0.00358277		228	0.00310791		833	0.0141472		412	0.00303413		238	0.013631		310	0.0286489
412	0.00288063		593	0.00356165		721	0.00310363		633	0.0140654		535	0.00303362		678	0.0136254		245	0.0285928
518	0.00288042		48	0.00355675		416	0.00308142		937	0.0140583		31	0.00299901		731	0.0135999		246	0.0284517
185	0.00286783		1	0.0035486		968	0.00303544		508	0.0140389		303	0.00298627		737	0.0135774		247	0.028399
458	0.00283809		658	0.00351984		623	0.00303246		442	0.0139354		539	0.00296634		683	0.0135336		248	0.027744
89	0.00282114		377	0.00349691		866	0.00303127		568	0.01383		392	0.00295316		738	0.0134682		311	0.0276905
181	0.00281276		132	0.00346907		385	0.00302624		483	0.0137067		606	0.00293275		55	0.0134412		249	0.0276576
586	0.00280718		185	0.00346733		482	0.00302373		271	0.0136632		543	0.00292781		222	0.0134147		312	0.027467
794	0.00276899		336	0.00344505		506	0.00302179		45	0.0136429		458	0.00292544		749	0.013411		250	0.0273649
710	0.00276726		93	0.00344232		392	0.00302118		1177	0.0136356		554	0.00289974		710	0.0133705		251	0.0270095
675	0.00272533		231	0.00341088		697	0.00299815		1256	0.0136155		745	0.00287664		716	0.0132862		454	0.026948
205	0.00270424		450	0.00335855		327	0.00297419		284	0.0135269		587	0.00284799		190	0.0132845		605	0.0267324
59	0.00270286		228	0.00333856		805	0.00296416		946	0.0134992		845	0.00284778		231	0.0132332		252	0.0267039
311	0.00269897		4	0.00331266		628	0.00295323		323	0.0134513		735	0.0028221		671	0.0132287		253	0.0266573
743	0.00269345		59	0.00330135		480	0.00293612		144	0.0134295		885	0.00281972		203	0.0132081		313	0.0263021
702	0.00269023		529	0.0032763		790	0.00293319		8	0.0131492		732	0.00279836		232	0.0131575		314	0.0262388
573	0.00268394		569	0.00325532		226	0.00293204		969	0.0131225		824	0.0027769		675	0.0131338		254	0.0261894
959	0.00267131		232	0.00319798		363	0.00292586		480	0.0130446		234	0.00277314		515	0.0130637		255	0.0259953
116	0.00267077		499	0.00318377		902	0.00291362		90	0.0130337		688	0.00276019		230	0.0130399		256	0.0259233
21	0.00267001		477	0.00318146		723	0.00289113		1217	0.0129839		25	0.00275729		904	0.0130244		315	0.025863
924	0.00266498		340	0.00317199		999	0.00287984		42	0.0127163		931	0.00273538		685	0.0129703		257	0.0258287
1007	0.00265836		613	0.00316943		949	0.00286723		446	0.0126899		743	0.00273388		728	0.0129485		258	0.0255694
366	0.00265588		357	0.00312578		992	0.00285176		1099	0.0126609		710	0.00272215		239	0.0128564		606	0.0254212
235	0.00263498		158	0.00312508		183	0.00284951		851	0.0126592		373	0.00271143		736	0.0128373		259	0.0253719
447	0.00262989		186	0.00311731		928	0.00283155		505	0.0125929		637	0.00270334		404	0.0127317		260	0.0253555
202	0.00260799		172	0.00308922		957	0.0028224		899	0.0125747		130	0.00270131		684	0.0126844		261	0.0253472
186	0.00260254		344	0.00305858		743	0.00280326		721	0.0125399		586	0.00269703		218	0.0126674		262	0.0253033
316	0.0025842		446	0.00299265		174	0.00279665		209	0.0125085		687	0.00268984		191	0.0125316		263	0.0249962
103	0.00257789		627	0.00298618		31	0.00274609		1154	0.0124321		341	0.00267061		227	0.0125178		264	0.0248948
992	0.00257685		128	0.00297126		420	0.00274583		4	0.0124151		306	0.00266718		221	0.0123685		4	0.0248523
733	0.00257235		404	0.00295448		290	0.0027294		381	0.0124126		121	0.00266521		724	0.012363		265	0.0245317
552	0.00256516		249	0.00294694		372	0.00272593		650	0.0123802		992	0.00266516		229	0.0123458		266	0.0244815
76	0.0025556		384	0.00294161		827	0.00272168		1189	0.0123766		428	0.00266217		690	0.0123408		267	0.0244677
553	0.00253351		533	0.00292775		216	0.00270911		1088	0.0123361		76	0.00262798		871	0.0123201		268	0.0244648
890	0.00253149		616	0.00286443		878	0.00270101		232	0.012232		908	0.00262702		240	0.0121728		316	0.0241015
279	0.00252669		300	0.00286128		36	0.00269865		469	0.0121958		972	0.00258872		195	0.0121503		269	0.0240933
699	0.00252065		142	0.00285363		145	0.00269795		1075	0.0121003		222	0.00258603		681	0.0121404		270	0.0240507
554	0.00251643		380	0.00282317		953	0.00269122		1175	0.0120126		926	0.00256444		735	0.0121346		271	0.0238167
972	0.00250335		69	0.00281477		945	0.00267213		392	0.0119782		733	0.00255146		680	0.0119869		272	0.023804
956	0.00249029		256	0.00280557		833	0.00267008		1225	0.0119094		275	0.00252291		739	0.011911		273	0.0237346
234	0.00248711		419	0.00277793		887	0.00266156		383	0.011873		304	0.00251798		197	0.0118559		274	0.0237197
9	0.00248362		416	0.00275737		242	0.0026525		1013	0.0118447		741	0.00250731		700	0.0117449		275	0.0234642
342	0.00246854		18	0.00272551		122	0.00264795		757	0.0117798		578	0.00250714		233	0.0115978		276	0.0233674
885	0.00245946		82	0.00268656		154	0.00263086		167	0.0117605		414	0.00250434		743	0.0114977		277	0.0233337
882	0.00245414		359	0.00267202		442	0.00260863		71	0.0117326		940	0.00249737		201	0.0114865		455	0.0231916
919	0.00244369		555	0.00265665		745	0.00259817		849	0.0117315		38	0.00249276		909	0.0113876		278	0.0231885
31	0.00241179		496	0.00264616		166	0.00259406		334	0.0116049		128	0.0024696		213	0.0112531		279	0.0231271
400	0.00239471		610	0.00263565		140	0.0025934		24	0.0115801		363	0.00246895		220	0.0112348		280	0.0230075
414	0.00238367		374	0.00262408		254	0.00255392		253	0.0115744		919	0.00246346		217	0.0110904		281	0.022868
687	0.00236398		639	0.00260452		222	0.00253052		824	0.0115453		122	0.00244961		725	0.011088		282	0.0228487
839	0.00236274		149	0.00259161		740	0.00253014		201	0.0115238		482	0.00243652		200	0.0110314		283	0.022801
669	0.0023554		165	0.00256812		931	0.00252574		1025	0.0113762		800	0.00243618		733	0.0109702		284	0.0227556
543	0.00234024		320	0.00252374		518	0.00252122		63	0.0112856		290	0.00243012		199	0.0109635		285	0.0226711
382	0.00233059		520	0.00252098		964	0.00251988		1176	0.011284		794	0.00242413		730	0.0108964		286	0.0226187
78	0.00231858		6	0.00250531		184	0.00250632		1158	0.0112609		70	0.00240071		531	0.0108392		287	0.0225931
454	0.00231297		233	0.00249918		872	0.00250552		882	0.0112001		154	0.00238406		206	0.0107975		288	0.0225475
577	0.00230978		111	0.00249592		688	0.00249405		777	0.0111648		518	0.00236629		688	0.0105527		5	0.0225311
25	0.00229008		510	0.00246297		274	0.00247391		896	0.0111264		615	0.00236474		891	0.0105377		289	0.0225123
647	0.00228871		433	0.00245084		34	0.0024712		938	0.011052		880	0.00236122		718	0.0105373		290	0.0225092
700	0.00228198		347	0.00243417		303	0.00244808		988	0.0109928		828	0.00235799		910	0.0103065		291	0.0223913
730	0.00227723		332	0.0024073		81	0.00244232		1197	0.0109906		202	0.0023513		726	0.0102389		292	0.0223118
8	0.0022611		302	0.00240367		959	0.00241997		1008	0.0109887		890	0.00235049		715	0.0102194		293	0.0222924
304	0.00225546		486	0.0024021		727	0.00240867		1091	0.0108615		152	0.00233322		744	0.0101838		294	0.0222811
434	0.00225412		13	0.00240046		336	0.0023969		1230	0.0107459		1007	0.0023324		391	0.0101624		295	0.0222775
931	0.00224883		350	0.00238988		679	0.00239098		1000	0.0106054		645	0.00232555		212	0.0100962		296	0.0221435
497	0.0022308		126	0.00237408		956	0.00237112		702	0.0105867		661	0.00232248		505	0.010052		297	0.0220414
600	0.0022273		152	0.00236864		121	0.00237047		106	0.0105468		183	0.00231549		234	0.00997595		298	0.0220134
373	0.00222434		631	0.00235223		884	0.00237029		327	0.0104987		953	0.00228678		463	0.00986789		6	0.0219474
852	0.00222399		173	0.00233979		152	0.00236863		266	0.0104414		430	0.0022767		18	0.00985959		299	0.0219017
215	0.00222172		134	0.00229473		614	0.00236695		1188	0.0104377		869	0.00227157		215	0.00975091		317	0.0218986
246	0.00220648		7	0.00229058		165	0.00235632		1048	0.0103916		945	0.00226033		225	0.00974612		456	0.0218567
444	0.00218725		319	0.00228615		687	0.00234179		1251	0.0103808		968	0.00225818		29	0.00957759		318	0.0217922
523	0.00217		577	0.00225212		584	0.00234069		532	0.0103266		400	0.00224242		922	0.00944461		457	0.0217417
395	0.00216102		634	0.0022486		840	0.00233851		850	0.0103171		723	0.00223922		925	0.00944261		607	0.0216947
666	0.00215516		663	0.00224702		649	0.00232498		145	0.010296		727	0.002238		209	0.0094237		300	0.021618
22	0.00214476		227	0.00221118		684	0.00232175		837	0.0100267		314	0.00223401		565	0.00934067		608	0.0216029
190	0.00211234		187	0.00220098		304	0.00231656		129	0.00999296		497	0.00222177		207	0.00933072		458	0.0215987
203	0.00210316		157	0.0021983		846	0.00230517		1146	0.00996039		716	0.00218412		717	0.00931432		319	0.0215342
806	0.00209068		210	0.00219742		734	0.00229663		595	0.00995293		852	0.00218168		237	0.00929284		320	0.021304
572	0.002083		162	0.00216844		155	0.00228947		839	0.00994517		924	0.00217936		722	0.00915828		321	0.0212789
913	0.00207837		502	0.00215651		523	0.0022878		828	0.00989347		326	0.00215666		189	0.00909226		7	0.0205449
789	0.00207522		491	0.00214901		678	0.00223779		1036	0.00987646		957	0.00214847		403	0.00904888		322	0.0204671
155	0.00206953		330	0.00213587		940	0.00223398		1254	0.00976915		788	0.00212661		188	0.00891275		323	0.0203515
645	0.00203847		120	0.0021049		706	0.00221433		710	0.00967984		669	0.00212056		187	0.00876926		324	0.0201994
896	0.00203091		189	0.00209641		486	0.00220537		686	0.00962532		474	0.00210609		401	0.00866467		325	0.0201895
212	0.00203017		545	0.00207936		344	0.00218187		443	0.00955445		9	0.00210211		216	0.0086081		326	0.0200122
557	0.00201865		115	0.00207895		439	0.00217478		753	0.00953358		896	0.00209782		714	0.00846205		459	0.0200038
1005	0.00201612		164	0.00206231		609	0.00217277		1166	0.00947488		769	0.00209122		493	0.00836018		327	0.0196155
615	0.00201564		506	0.00205054		456	0.00216334		82	0.0094365		647	0.00208888		870	0.00835397		328	0.0194489
716	0.00200477		615	0.00204881		970	0.00215197		9	0.00941267		941	0.00208527		873	0.00832344		8	0.0192509
345	0.00200051		598	0.00202799		192	0.00213949		231	0.00932957		395	0.00208422		226	0.00830482		609	0.0187256
250	0.00199565		522	0.00201395		27	0.00213803		99	0.00932769		241	0.0020724		399	0.00826565		329	0.0185922
262	0.00198708		459	0.0020082		602	0.00212482		709	0.00930329		21	0.00206581		689	0.00807884		330	0.0184249
721	0.00198324		113	0.00200433		663	0.00208676		324	0.00929719		913	0.00206247		223	0.00806032		331	0.0184166
43	0.00196311		206	0.00199371		732	0.00208002		136	0.00924566		89	0.00206099		521	0.00777223		332	0.0183715
769	0.00195194		396	0.00198678		629	0.002075		127	0.00923153		555	0.00205791		747	0.00776522		610	0.0183445
788	0.00193715		80	0.0019747		886	0.00206095		572	0.00919022		12	0.00203739		10	0.00766246		460	0.0182235
314	0.00193613		178	0.00197405		99	0.00205162		1039	0.00918192		8	0.00202777		712	0.00747024		333	0.0180347
374	0.00192776		3	0.00194797		415	0.00204637		134	0.00917331		600	0.00202717		869	0.00729731		334	0.0179551
290	0.00192443		592	0.00193523		661	0.00204461		684	0.00916429		201	0.00201294		51	0.00725651		611	0.0179515
312	0.00192025		442	0.00193333		707	0.00203861		91	0.00915287		382	0.00200734		204	0.0072545		9	0.0177921
165	0.00191995		250	0.00189237		941	0.00203411		776	0.00912616		22	0.00200235		868	0.00717028		335	0.0175015
741	0.00191545		42	0.00185897		266	0.00203237		1164	0.00909239		434	0.00199695		456	0.00711463		612	0.0174853
68	0.00190647		370	0.0018256		168	0.00200098		140	0.00908367		36	0.00197514		196	0.00707621		461	0.0173979
735	0.00189333		385	0.00180685		796	0.00199743		987	0.00901416		663	0.00196287		949	0.00693746		462	0.0172856
530	0.00189117		422	0.00179307		666	0.00198928		1238	0.00896548		700	0.00192649		34	0.00691684		336	0.0172721
241	0.0018607		526	0.00179203		540	0.00198174		559	0.00895164		692	0.0019039		541	0.00687109		337	0.0171614
264	0.00186013		656	0.00178496		16	0.00198029		180	0.00893106		164	0.00189828		861	0.00684638		463	0.0171383
201	0.00184261		375	0.0017793		965	0.00197285		105	0.00892458		40	0.00189553		863	0.00676387		10	0.0170851
663	0.00183676		378	0.00177889		346	0.00194498		72	0.0088843		246	0.0018878		934	0.00673895		338	0.0170151
288	0.00183425		41	0.00176538		976	0.00193954		339	0.00887964		262	0.00188559		918	0.00667127		339	0.0169016
555	0.00182611		241	0.0017603		78	0.00193672		623	0.00880381		917	0.00188271		392	0.00663689		340	0.0168946
800	0.00182434		606	0.00175556		556	0.00193542		838	0.00875961		850	0.00188264		855	0.00663104		464	0.0168325
508	0.00182208		14	0.00174952		648	0.00193375		957	0.00867472		449	0.00184416		859	0.00661618		341	0.0167803
578	0.00180171		234	0.00174929		384	0.00192682		257	0.00865919		103	0.0018407		867	0.00660433		342	0.0167129
940	0.00179945		458	0.00174069		670	0.00191498		98	0.00863913		530	0.00182734		549	0.00660363		343	0.0167068
917	0.00179167		461	0.00172542		63	0.0018898		371	0.00861125		602	0.00182694		864	0.00658117		11	0.0166626
340	0.00178231		575	0.00171002		407	0.00188824		1221	0.00859812		552	0.00182168		698	0.00657648		613	0.0166512
341	0.0017774		284	0.00167304		753	0.0018747		635	0.00851343		374	0.00179816		854	0.00657357		344	0.0164975
191	0.00176367		581	0.00166618		359	0.00187375		608	0.00848954		203	0.00179105		860	0.0065728		345	0.016463
334	0.00176322		34	0.00165407		281	0.00187072		122	0.00846857		684	0.00178887		720	0.00656013		346	0.0163577
858	0.00176183		558	0.00161073		559	0.00186928		986	0.00839213		345	0.0017817		856	0.00655549		347	0.0161607
210	0.00175887		382	0.0015993		603	0.00184242		21	0.00838407		638	0.00176758		865	0.00655389		12	0.0161591
926	0.00173527		136	0.0015877		270	0.0018363		28	0.00836551		480	0.00175751		707	0.00654546		465	0.0161573
420	0.00173346		103	0.00157492		406	0.00183515		247	0.00834804		155	0.0017564		398	0.00653246		466	0.0161556
322	0.00173123		405	0.0015719		856	0.00183139		462	0.00834073		882	0.00174166		902	0.00651538		13	0.0160181
430	0.00173101		402	0.0015666		447	0.00182653		545	0.00832004		340	0.00173823		866	0.00648027		467	0.0159982
228	0.00170619		507	0.00156551		464	0.00180841		588	0.00830895		872	0.00173613		35	0.00638933		614	0.0159596
248	0.00169848		334	0.00156262		144	0.00180183		716	0.00829704		851	0.00173565		862	0.00638403		348	0.015795
659	0.0016822		535	0.00156006		431	0.00180133		940	0.00829502		523	0.00173473		708	0.00634563		349	0.0157813
512	0.00168139		221	0.00155603		607	0.00178366		1162	0.00822959		567	0.00172176		916	0.00633277		468	0.0157022
796	0.00167206		39	0.00155339		535	0.00178322		696	0.00819915		939	0.00172046		858	0.0063047		350	0.0156227
930	0.00164266		386	0.00155167		137	0.00177635		465	0.00817814		548	0.00172006		713	0.00627125		14	0.0155735
132	0.0016382		624	0.00155164		966	0.00176296		562	0.00814588		59	0.00171944		524	0.00625979		351	0.0155514
164	0.00163513		310	0.00154897		354	0.00176074		373	0.00811415		393	0.00170525		385	0.00625746		615	0.0154078
872	0.0016337		40	0.00151338		182	0.0017541		250	0.00810786		528	0.001682		857	0.00625282		352	0.0153592
614	0.00163215		642	0.00151236		1005	0.00172971		14	0.00809537		166	0.00166811		198	0.00624273		15	0.0153539
965	0.00162895		346	0.00147991		376	0.00171514		506	0.00809358		508	0.00166636		709	0.00622202		616	0.0153028
874	0.00162437		305	0.00147755		539	0.00171142		254	0.00798898		702	0.00165573		701	0.00614993		353	0.0152814
976	0.00162329		77	0.00147737		988	0.0017009		433	0.00798889		182	0.00164727		370	0.00609917		354	0.0152448
616	0.00161005		21	0.00146942		268	0.00169453		613	0.00798496		254	0.00164683		38	0.00607953		469	0.015223
988	0.00160778		68	0.00145577		342	0.00167133		197	0.00798328		847	0.00164195		506	0.00607555		355	0.0152036
197	0.00160334		532	0.00143572		393	0.00166922		509	0.00795716		116	0.00163864		1007	0.00598007		356	0.0151099
947	0.00160244		494	0.00143198		235	0.00165333		335	0.00789441		955	0.00162525		454	0.00596437		357	0.0150928
835	0.00159144		92	0.00143137		117	0.00164958		35	0.00783065		274	0.00161747		853	0.00591362		16	0.0150401
850	0.00158789		541	0.00142084		739	0.00163042		560	0.00774546		292	0.00160916		959	0.0058141		17	0.0149291
968	0.00158751		457	0.00139901		845	0.00160258		1210	0.0076725		557	0.0016009		852	0.00579029		358	0.0148559
618	0.00157244		146	0.00139728		170	0.00159672		820	0.00767233		825	0.00159759		849	0.00575996		18	0.0148215
813	0.00153014		556	0.00137175		449	0.00158762		556	0.00766665		215	0.00158673		192	0.00573347		19	0.0146126
602	0.00152813		32	0.00137017		634	0.00158549		672	0.00765504		63	0.00157953		604	0.00569562		617	0.0145593
540	0.00152734		269	0.0013571		288	0.00157913		625	0.00763621		184	0.00157936		193	0.00568737		359	0.0145026
1001	0.00150648		560	0.0013539		709	0.00157698		1062	0.00759137		249	0.00154608		94	0.00568571		360	0.0144417
149	0.00150571		623	0.00130905		616	0.00157305		135	0.00755289		165	0.00154465		964	0.00566907		618	0.0144249
214	0.00150454		283	0.0013059		613	0.00156619		126	0.00754697		965	0.00154218		977	0.00565845		470	0.0143671
154	0.00147978		183	0.0013009		381	0.00155415		955	0.00747201		264	0.00153977		184	0.00565113		361	0.0143445
486	0.00146832		657	0.00128435		669	0.00155126		68	0.00746814		990	0.00152337		93	0.00560795		619	0.0142792
550	0.00146728		473	0.00127762		633	0.00154932		1134	0.00746154		976	0.00152313		706	0.00559972		471	0.0142066
326	0.00145963		388	0.00127362		87	0.0015415		866	0.00741344		190	0.00152251		412	0.00559077		20	0.0140893
520	0.00144637		135	0.00125901		285	0.00153941		1004	0.00741098		351	0.00151138		921	0.00556723		472	0.0140292
824	0.0014441		105	0.0012479		701	0.00153759		195	0.00741084		486	0.00150842		365	0.00554993		362	0.0139586
41	0.00143437		278	0.00123504		341	0.00153582		166	0.0074082		447	0.00149534		848	0.00553554		363	0.0139332
166	0.00142852		45	0.00123335		736	0.00153512		898	0.0074007		614	0.00149405		851	0.00549956		473	0.0138976
928	0.00142701		487	0.00122772		939	0.00153448		692	0.00733952		442	0.00149345		480	0.00548073		21	0.0138745
183	0.00141837		590	0.00121008		286	0.00152226		111	0.00732814		288	0.00148765		98	0.00546035		364	0.0138175
732	0.00141398		54	0.00120703		1015	0.00151918		656	0.00731489		827	0.00146919		561	0.00541354		22	0.0137405
225	0.00140812		86	0.00119673		1018	0.0015191		119	0.00731294		603	0.00146896		1005	0.00536485		365	0.0137313
109	0.0014038		129	0.00117885		17	0.00151687		230	0.00731133		806	0.00146801		956	0.00531114		474	0.0137228
478	0.00140242		264	0.00116353		990	0.0015012		737	0.00721347		829	0.00145763		850	0.00527366		620	0.0137182
254	0.00137143		144	0.00116198		672	0.00150059		644	0.00719677		618	0.00144545		9	0.00525046		621	0.0136553
837	0.00136895		403	0.00116059		306	0.00149299		336	0.00719599		811	0.00144294		400	0.00520412		622	0.0136521
487	0.00136806		217	0.00115745		38	0.00148921		406	0.00715799		176	0.00144235		929	0.00517995		623	0.0136489
349	0.00136404		489	0.00115419		920	0.00148883		600	0.00714648		109	0.00143521		96	0.005171		23	0.01362
292	0.00136282		282	0.00115028		500	0.00147114		315	0.00713757		660	0.0014327		414	0.00515584		624	0.0135592
474	0.00135256		37	0.00114448		654	0.00146877		567	0.00712681		174	0.00140934		610	0.00514487		625	0.0134868
60	0.00134777		73	0.00113931		408	0.00146875		289	0.00711201		666	0.00140857		481	0.00511774		24	0.0133813
268	0.00134737		516	0.00111974		84	0.00145452		950	0.00705186		753	0.00140808		847	0.00509617		25	0.013354
480	0.00134529		116	0.00111306		1001	0.00145122		356	0.00701898		973	0.00138891		931	0.00508246		626	0.0133225
626	0.00133773		521	0.00111002		769	0.00145057		905	0.00698307		793	0.00138107		100	0.00505884		26	0.0132895
847	0.00133424		524	0.00108615		440	0.00144558		673	0.00697893		322	0.00137892		846	0.00505879		27	0.0132557
377	0.00133107		109	0.00108284		947	0.00143937		66	0.00697673		149	0.00137218		603	0.00503056		475	0.0132218
567	0.00132926		354	0.00105112		24	0.00142994		1201	0.00695762		444	0.00136085		91	0.00498645		476	0.0131443
36	0.00132057		339	0.00103939		642	0.00141412		827	0.00694639		520	0.00135987		607	0.00497629		366	0.0131379
1018	0.00132029		622	0.00103764		811	0.00141318		1047	0.00692281		590	0.00134722		103	0.00494676		367	0.0131147
64	0.00132009		607	0.00103038		6	0.00141147		2	0.00689108		715	0.0013441		92	0.0049301		368	0.0130806
12	0.00131854		141	0.00102099		982	0.00140332		844	0.00686978		988	0.00133865		845	0.00492914		477	0.013015
939	0.00129374		464	0.000999		527	0.00139708		902	0.0067916		823	0.00132379		627	0.00490805		627	0.0130042
745	0.00128727		668	0.000987		490	0.00139352		378	0.00678794		242	0.00131716		719	0.00488121		628	0.0129026
718	0.00128595		480	0.000985		508	0.00137147		317	0.00674127		982	0.00131087		467	0.00486567		478	0.012864
757	0.00125942		180	0.000976		411	0.0013698		273	0.00673579		464	0.00130084		608	0.00486215		629	0.0128383
363	0.0012384		608	0.000973		435	0.00136426		742	0.00666282		858	0.00130074		602	0.00486173		369	0.0127937
954	0.00122781		418	0.000969		240	0.00136289		366	0.00665885		943	0.00129978		8	0.00486061		479	0.0127664
739	0.00122231		220	0.000949		816	0.0013617		640	0.00655364		454	0.00129844		517	0.00485568		480	0.0127506
27	0.0012167		349	0.000936		489	0.00136067		525	0.00653985		766	0.00129632		21	0.00484883		28	0.0126591
723	0.00120664		297	0.000927		262	0.00136053		1071	0.00648448		206	0.00127112		609	0.00479877		29	0.0125854
638	0.00120632		205	0.000902		905	0.00135414		41	0.00648354		616	0.00126369		908	0.0047579		370	0.0125537
590	0.00120531		184	0.000892		618	0.00134769		848	0.0064576		268	0.00126271		535	0.00475358		481	0.0125537
728	0.00120411		355	0.000876		674	0.00134732		131	0.00642644		928	0.00125455		381	0.00471267		30	0.0123926
222	0.00119562		281	0.00086		867	0.00134069		1028	0.00637521		132	0.00125376		876	0.00470725		482	0.0123692
633	0.00119313		106	0.00085		705	0.00132901		1248	0.00633388		266	0.00125003		940	0.00469576		630	0.0122795
989	0.00118313		290	0.000845		750	0.00132705		213	0.00626771		703	0.00124397		99	0.00455395		31	0.0122709
195	0.00117948		573	0.000831		70	0.00132325		617	0.00625476		60	0.00123716		465	0.00450124		371	0.0122319
393	0.00117214		104	0.000828		419	0.00132088		19	0.00623969		540	0.00123644		117	0.00445352		631	0.0121965
351	0.0011702		188	0.000823		196	0.00131701		1118	0.00623372		900	0.00122146		884	0.00445177		372	0.0121951
442	0.00114966		260	0.000817		497	0.00131608		978	0.00623272		248	0.00122126		208	0.0044503		373	0.0121716
389	0.00114758		16	0.000814		8	0.0013119		1253	0.00622975		478	0.00120998		841	0.00444296		32	0.0120995
798	0.00114054		619	0.000808		741	0.00131052		1117	0.00619442		796	0.00120547		924	0.00437896		483	0.0120378
168	0.0011403		603	0.00079		784	0.00130945		712	0.00617182		134	0.00120273		22	0.00436664		33	0.0119503
746	0.00113807		247	0.00077		563	0.00130458		300	0.00616509		1018	0.00120111		25	0.0043652		484	0.0119204
464	0.00113756		640	0.000758		853	0.00130057		1208	0.00614177		324	0.00120095		101	0.00435971		374	0.0118648
527	0.00112762		454	0.000745		630	0.00129628		1167	0.00613338		779	0.00119184		539	0.00435264		375	0.0118219
982	0.00112753		121	0.000721		487	0.00129247		1023	0.00613132		168	0.00118808		697	0.00431921		34	0.0118101
266	0.00112056		611	0.000716		943	0.00129092		661	0.00612415		966	0.00118697		606	0.00431621		35	0.0117872
7	0.00111964		272	0.0007		370	0.00128802		528	0.00607493		570	0.00118431		1001	0.00431178		36	0.0117746
678	0.00111839		223	0.0007		526	0.00127502		845	0.00603741		212	0.00117527		114	0.00427358		37	0.0117573
206	0.00110671		315	0.000696		899	0.00127182		1220	0.00601291		195	0.00117454		879	0.00425705		485	0.0117469
134	0.00109919		531	0.000688		927	0.00127097		283	0.00594848		718	0.00117441		1018	0.0042349		632	0.0117404
634	0.00109638		237	0.000684		388	0.00126791		1116	0.00594837		961	0.00116479		497	0.004214		486	0.0117349
703	0.00108452		437	0.000679		292	0.00124604		549	0.0059413		90	0.0011624		842	0.0041858		38	0.0117346
306	0.00108375		481	0.000666		779	0.00121533		249	0.00582343		1005	0.00114299		40	0.00415407		376	0.0117238
249	0.00108221		605	0.000664		33	0.00121311		157	0.00581184		225	0.00114204		844	0.00413645		39	0.0117221
955	0.00107903		638	0.000662		658	0.00120091		994	0.00580347		659	0.00113734		420	0.00413505		377	0.0116916
621	0.0010686		89	0.000651		861	0.00119918		979	0.00579096		930	0.00113029		601	0.00412256		633	0.0116148
84	0.0010611		271	0.000649		218	0.00119617		852	0.0057405		970	0.00112554		809	0.00404245		487	0.0115876
176	0.00105955		244	0.000644		9	0.00119093		391	0.0057389		989	0.00111265		107	0.00403547		378	0.0115824
625	0.00105634		276	0.000641		637	0.00118328		631	0.00573255		750	0.00110785		605	0.00403457		40	0.0115435
467	0.00105366		528	0.000638		512	0.00118318		325	0.00572946		420	0.00110022		810	0.00403038		488	0.0115224
943	0.00105135		587	0.000637		245	0.0011814		751	0.00570814		670	0.00109516		919	0.00402059		379	0.0115214
804	0.00105074		52	0.000626		954	0.00116783		1174	0.00569676		790	0.00109199		104	0.00401276		380	0.0114905
286	0.00103851		19	0.000619		1008	0.00115737		235	0.00568121		352	0.00107053		112	0.00395824		381	0.0114534
479	0.00103812		199	0.000617		357	0.00115594		1157	0.00566923		625	0.00107022		624	0.00393391		41	0.0114278
966	0.00103653		415	0.000616		455	0.0011511		1212	0.00565748		577	0.00106844		703	0.00389044		382	0.01141
14	0.00103513		664	0.000613		25	0.00114765		380	0.00564953		609	0.00105953		546	0.00388332		634	0.0113994
598	0.00103245		465	0.000612		911	0.00114144		1228	0.00564384		814	0.00105627		115	0.00387034		489	0.0113895
131	0.00102912		490	0.000602		432	0.00112937		191	0.00563485		377	0.00103308		613	0.00386107		490	0.0113704
750	0.0010265		298	0.000593		893	0.0011276		252	0.00563121		467	0.00102377		939	0.00384583		491	0.0113675
753	0.00101641		604	0.000592		713	0.00112579		804	0.00558768		286	0.00101854		95	0.00382443		42	0.0112292
528	0.00100887		198	0.000583		417	0.00111989		587	0.00558522		68	0.00101366		508	0.00378405		635	0.0111653
727	0.00100657		368	0.000583		198	0.00110949		516	0.00556049		621	0.00101254		537	0.00374269		383	0.0110914
200	0.00100533		580	0.000581		93	0.00110868		419	0.00554723		757	0.00100957		913	0.00372496		43	0.0110765
174	0.00100345		236	0.00058		148	0.00109689		165	0.00551346		835	0.00100908		105	0.00372357		384	0.0110473
372	0.000996		612	0.00058		608	0.00108604		477	0.00549289		512	0.00100741		346	0.00370482		44	0.0110298
368	0.000991		447	0.000575		520	0.00108495		316	0.00547481		678	0.000999		1015	0.00369542		385	0.0110101
679	0.000971		543	0.000573		208	0.00108387		951	0.00545907		665	0.000996		299	0.00368452		386	0.0109616
1015	0.000967		548	0.000569		717	0.00108327		569	0.00545032		146	0.000993		611	0.00368347		387	0.0109251
961	0.000965		474	0.000563		314	0.00108184		671	0.00544733		6	0.000987		113	0.00367729		388	0.0109034
6	0.000949		61	0.00055		544	0.00107948		330	0.00544623		550	0.000982		97	0.00365863		636	0.0108668
289	0.000943		118	0.000548		498	0.00107813		276	0.00534902		633	0.00098		808	0.0036517		637	0.0108582
380	0.000939		140	0.000545		474	0.00106991		181	0.00531071		728	0.000974		344	0.00363623		389	0.0108182
106	0.000939		467	0.000544		150	0.00105411		173	0.00526707		679	0.00097		282	0.00362199		638	0.0108043
511	0.000934		62	0.000534		89	0.00104483		272	0.00524331		947	0.000969		955	0.00361089		639	0.0107973
814	0.000927		412	0.000531		989	0.00104047		472	0.00520263		99	0.000959		553	0.00360546		492	0.0107588
566	0.000925		91	0.000529		730	0.00103963		413	0.00519866		14	0.000955		622	0.00357481		390	0.0107516
762	0.00092		542	0.000528		530	0.00103734		104	0.00518056		1001	0.000953		424	0.00357069		391	0.0107468
973	0.000911		483	0.000528		492	0.00103709		1147	0.00517191		736	0.00095		431	0.00356444		392	0.0107181
146	0.000905		75	0.000505		877	0.00103441		211	0.00513248		7	0.000948		843	0.00355388		493	0.0106533
684	0.000901		333	0.000504		280	0.00103188		1059	0.00511941		27	0.000944		978	0.00354489		393	0.0106509
670	0.000899		216	0.000499		749	0.0010304		1094	0.00511259		41	0.000937		111	0.00353862		640	0.0106457
501	0.000897		512	0.000491		418	0.00101762		958	0.00510818		760	0.00092		943	0.00352834		641	0.0106394
182	0.000894		312	0.000475		798	0.00100812		766	0.005086		730	0.000916		59	0.00351338		494	0.0106077
449	0.000891		599	0.000473		572	0.001		942	0.00508506		942	0.000909		614	0.00349189		394	0.0105914
274	0.000887		66	0.000471		985	0.000996		884	0.00508325		93	0.000903		552	0.0034906		395	0.0105855
715	0.000884		430	0.000471		444	0.000991		461	0.00505986		762	0.000903		182	0.00348281		396	0.0105785
364	0.000878		618	0.00047		760	0.000983		626	0.00503186		652	0.000899		290	0.00347826		495	0.0105709
87	0.000878		204	0.00046		714	0.000981		966	0.00499982		501	0.000898		350	0.00347623		496	0.0105391
135	0.000872		83	0.000447		315	0.000974		674	0.00499375		739	0.000895		617	0.00346808		642	0.0105185
296	0.000871		360	0.000417		737	0.000964		69	0.00499284		496	0.000893		110	0.00346633		397	0.0104944
816	0.000858		559	0.00041		766	0.000961		1165	0.00497553		33	0.000886		799	0.0034345		398	0.0104315
352	0.00085		291	0.000409		961	0.000958		57	0.00494374		596	0.000884		883	0.00343361		399	0.0104211
1008	0.000845		153	0.000392		832	0.000958		669	0.00493071		106	0.000882		288	0.00342554		643	0.0104166
851	0.000837		33	0.00039		215	0.000956		1213	0.00492523		87	0.000866		183	0.00342358		400	0.0103916
542	0.000832		177	0.000385		52	0.000955		217	0.00491578		634	0.00086		620	0.00341572		644	0.0103762
990	0.000819		626	0.000366		225	0.000953		471	0.00491179		804	0.00086		615	0.00340892		45	0.0103733
24	0.000818		479	0.000364		106	0.000948		688	0.00490388		1015	0.00086		973	0.00340738		46	0.0103702
692	0.000817		381	0.000361		728	0.000947		639	0.00490264		147	0.000858		917	0.00340631		47	0.0103635
570	0.000816		79	0.000356		109	0.000944		1031	0.00485397		197	0.000856		345	0.00340199		401	0.0103278
455	0.000806		214	0.000356		21	0.000942		1029	0.00483969		487	0.000856		471	0.00338009		402	0.0103121
489	0.000805		253	0.000354		621	0.000942		40	0.00482566		347	0.000853		349	0.00337465		645	0.0102709
833	0.000805		311	0.000353		103	0.00094		1107	0.004804		338	0.000853		286	0.00336333		497	0.0102455
90	0.000804		318	0.000348		107	0.000933		355	0.00479854		84	0.000853		12	0.0033629		403	0.0102401
147	0.000803		219	0.000347		662	0.000927		926	0.00479701		334	0.000853		805	0.00335819		48	0.0102369
433	0.000802		94	0.000342		895	0.000922		724	0.00479405		107	0.000842		300	0.00335348		646	0.0102366
151	0.000793		519	0.000328		1006	0.00091		1115	0.00479038		566	0.000841		801	0.00334415		498	0.0102336
793	0.000792		207	0.000328		865	0.000908		977	0.00472762		191	0.000836		360	0.00333612		499	0.010229
504	0.000789		673	0.000322		413	0.000907		130	0.00471445		465	0.000834		374	0.0032702		404	0.0102099
857	0.000786		426	0.000321		220	0.000906		707	0.00465474		690	0.000828		460	0.00326416		500	0.0102077
826	0.000785		413	0.000319		130	0.000906		993	0.00461925		672	0.000824		289	0.00325991		49	0.0101845
496	0.000784		469	0.000315		395	0.000905		208	0.00459501		135	0.000819		351	0.00325575		405	0.0101731
67	0.000779		190	0.000311		40	0.000898		76	0.00458821		838	0.000817		453	0.00324129		406	0.0101534
548	0.000775		661	0.00031		204	0.000892		207	0.00457796		439	0.000814		287	0.00323847		647	0.0101368
477	0.00077		373	0.00031		244	0.000886		496	0.00456426		719	0.000809		930	0.00322979		407	0.0101327
507	0.000764		409	0.000306		973	0.000886		1182	0.00454556		490	0.000808		348	0.00322747		648	0.0101083
49	0.000762		372	0.000305		454	0.000883		1012	0.00452444		905	0.000802		803	0.00322281		501	0.0100927
285	0.000762		169	0.000285		236	0.000879		1092	0.0045242		507	0.000798		285	0.00321813		408	0.0100554
439	0.000754		325	0.000284		160	0.000868		347	0.00449802		960	0.000794		612	0.00321668		50	0.0100312
985	0.000753		314	0.000284		156	0.000867		435	0.00449366		1008	0.000793		795	0.00321585		649	0.00999514
970	0.000751		225	0.000284		860	0.000866		557	0.00445984		79	0.000792		116	0.00320667		650	0.00994578
724	0.000746		29	0.000282		558	0.000859		368	0.00444613		897	0.00079		616	0.00320244		409	0.00989818
905	0.000745		262	0.000281		933	0.000857		697	0.00443185		646	0.000767		806	0.00319017		651	0.00988309
79	0.000745		38	0.000279		355	0.000856		670	0.00442224		954	0.000766		800	0.00318833		502	0.00985628
159	0.000743		151	0.000274		824	0.000854		1151	0.00441187		995	0.000747		342	0.00318446		652	0.00984708
936	0.000737		304	0.000271		644	0.000848		343	0.00439049		933	0.000745		1008	0.00318079		653	0.00983193
978	0.000732		428	0.000268		942	0.000847		894	0.0043813		504	0.00074		353	0.00316893		503	0.00976652
942	0.000725		448	0.000265		804	0.000829		967	0.00436778		389	0.000739		298	0.00316597		654	0.00976463
242	0.000722		647	0.000263		894	0.000819		321	0.00436179		514	0.000738		106	0.0031638		410	0.00974426
911	0.000721		579	0.000259		340	0.000813		428	0.00436164		489	0.000737		621	0.00313954		655	0.00974003
47	0.000714		633	0.000255		48	0.000812		658	0.00433475		285	0.000732		798	0.00313844		411	0.00972617
39	0.000709		513	0.000248		542	0.000811		620	0.00433045		572	0.000729		347	0.00313443		504	0.00971184
779	0.000707		482	0.000248		238	0.000808		829	0.00426562		372	0.000728		557	0.00312337		505	0.00969674
660	0.000704		213	0.000248		164	0.000807		160	0.00425216		653	0.000722		796	0.00312312		412	0.00967488
37	0.000701		266	0.000247		593	0.000806		215	0.00424016		613	0.000721		284	0.00312204		506	0.00966615
423	0.0007		27	0.000244		507	0.000805		1178	0.00422139		131	0.000719		355	0.00309883		656	0.00955328
646	0.000696		286	0.000232		410	0.000803		1052	0.00420302		784	0.000719		792	0.0030644		657	0.00952459
490	0.000687		127	0.000226		251	0.000802		1073	0.00419405		307	0.000716		794	0.00306279		413	0.00948419
500	0.000687		484	0.000221		22	0.000802		210	0.00418945		826	0.000712		797	0.00304967		414	0.00947779
294	0.000677		376	0.000215		101	0.0008		865	0.00417131		662	0.00071		421	0.00304703		415	0.00946865
384	0.000669		462	0.000212		128	0.000798		805	0.0041615		16	0.000709		291	0.00304088		416	0.00945238
603	0.000666		313	0.000211		528	0.000795		319	0.00415711		30	0.000708		343	0.00303958		51	0.00944639
52	0.000658		5	0.000208		955	0.000794		1019	0.00415136		210	0.000706		109	0.00303917		658	0.00941896
946	0.000655		456	0.000205		610	0.000792		867	0.00414539		749	0.000693		339	0.00303394		417	0.00941645
736	0.00065		549	0.000204		554	0.000792		139	0.0041183		978	0.000688		466	0.00302897		52	0.00940096
371	0.000642		594	0.000198		343	0.000784		308	0.00408532		159	0.000687		468	0.0030004		53	0.00939213
383	0.000638		154	0.000195		12	0.000771		100	0.00406888		384	0.000673		530	0.00298794		507	0.00933954
775	0.000636		76	0.000193		205	0.000765		1243	0.00400237		588	0.000671		626	0.00296772		508	0.00931208
933	0.000635		268	0.000192		434	0.000764		939	0.0039991		289	0.00066		618	0.00296444		54	0.00931046
581	0.000635		540	0.000192		143	0.000764		591	0.00395856		136	0.000656		625	0.00294822		509	0.00931044
900	0.000632		321	0.000183		162	0.000763		320	0.00395555		746	0.000655		459	0.00294235		418	0.00926928
163	0.000632		160	0.000172		975	0.000751		925	0.00395447		455	0.000653		359	0.00293829		55	0.00926749
199	0.000631		636	0.00017		926	0.000748		985	0.0039405		527	0.000642		337	0.00293726		419	0.00925086
136	0.000625		47	0.000165		294	0.000746		932	0.00393925		731	0.000641		13	0.00293102		420	0.00924906
963	0.000624		492	0.000162		233	0.000744		47	0.00393029		568	0.000632		543	0.00292822		659	0.00923485
356	0.000623		139	0.00016		746	0.000743		432	0.0039279		598	0.000631		341	0.00292754		660	0.00921438
227	0.000623		407	0.000158		574	0.000739		141	0.00392304		626	0.000617		281	0.0029171		661	0.00920447
465	0.000621		629	0.000145		173	0.000736		875	0.00392057		532	0.000617		942	0.00291651		510	0.00920238
568	0.000614		274	0.000145		881	0.000736		1123	0.00392024		19	0.000616		802	0.00291419		511	0.00915836
63	0.000612		197	0.000142		731	0.000736		1260	0.00391759		294	0.000616		963	0.00289847		56	0.00915086
766	0.00061		17	0.00014		141	0.000735		1112	0.00391041		24	0.000615		352	0.00288972		421	0.00915047
338	0.000608		449	0.000132		428	0.000732		632	0.00388041		878	0.000613		277	0.00288576		422	0.00914836
362	0.000605		431	0.000125		265	0.000731		683	0.00387631		362	0.000612		283	0.00288401		512	0.00914763
160	0.000603		421	0.000122		429	0.000729		754	0.00387214		349	0.00061		791	0.00288067		662	0.00909782
596	0.000601		248	0.000121		762	0.000721		1179	0.00384572		832	0.000604		293	0.00288001		513	0.00904851
822	0.000597		215	0.000118		289	0.00072		1119	0.00384138		64	0.000602		7	0.002875		663	0.00902481
48	0.000593		70	0.000116		665	0.000717		1209	0.00384105		526	0.000601		895	0.0028444		57	0.00898633
526	0.000588		676	0.000111		362	0.000715		558	0.00383199		327	0.000598		990	0.00282944		423	0.00898576
213	0.000587		20	0.00011		176	0.000715		992	0.00382124		985	0.000596		933	0.00282355		514	0.00896985
265	0.000586		143	0.000108		582	0.000711		731	0.00381629		477	0.000595		356	0.00279362		664	0.00896792
776	0.000584		251	0.000103		757	0.000711		128	0.00381227		712	0.000586		279	0.00278492		424	0.00894842
624	0.000582		363	9.83e-05		330	0.000707		551	0.00378981		936	0.00058		793	0.00278073		665	0.00894445
653	0.000577		328	9.45e-05		129	0.000702		819	0.0037766		231	0.000578		14	0.0027794		425	0.00893153
613	0.000574		652	9.02e-05		461	0.000694		1056	0.00375832		862	0.000576		340	0.00275935		515	0.00888341
665	0.000572		163	8.85e-05		177	0.000675		880	0.00375245		607	0.000572		928	0.002754		426	0.00886312
672	0.000572		478	8.42e-05		467	0.000674		185	0.00373366		450	0.00057		275	0.00275204		516	0.00885474
832	0.000572		488	8.38e-05		88	0.000673		77	0.00371537		151	0.000565		1006	0.00274381		666	0.00882575
281	0.000571		417	7.87e-05		247	0.000666		536	0.00369676		383	0.000564		295	0.00273989		517	0.00881868
156	0.000565		501	7.76e-05		850	0.000664		5	0.00369353		542	0.000563		296	0.00273055		667	0.00881854
74	0.000564		511	7.36e-05		825	0.000657		1150	0.0036926		950	0.000562		991	0.00271604		58	0.00880508
492	0.000559		401	7.23e-05		889	0.000651		227	0.00368869		315	0.000558		292	0.00267452		518	0.00878121
16	0.000554		200	7.17e-05		859	0.000646		39	0.00368302		160	0.000556		102	0.00267104		668	0.00875783
19	0.000553		209	6.97e-05		1019	0.000643		708	0.00366271		330	0.000553		354	0.00263205		519	0.00874681
207	0.000552		159	6.97e-05		409	0.000637		1087	0.00365607		798	0.000552		280	0.00262747		427	0.00873504
538	0.00055		596	6.93e-05		852	0.000636		229	0.00364257		218	0.000546		335	0.00262712		520	0.00871211
408	0.000549		391	6.75e-05		978	0.000633		542	0.00363931		697	0.000541		804	0.00258506		59	0.00867155
599	0.000545		192	6.63e-05		683	0.000632		10	0.00362018		479	0.000534		1019	0.00258076		60	0.00866441
1006	0.000544		397	6.34e-05		514	0.00063		524	0.00361276		500	0.000531		807	0.00257011		669	0.00865463
99	0.000538		258	6.21e-05		677	0.000626		1156	0.00360649		720	0.000528		297	0.00256899		61	0.00859352
437	0.000533		557	6.11e-05		151	0.000613		353	0.00360177		544	0.000524		520	0.00256061		428	0.00859348
650	0.000527		26	5.95e-05		264	0.000612		862	0.00359099		193	0.000523		338	0.00254718		429	0.00856042
61	0.000526		238	5.76e-05		7	0.000611		584	0.00357212		170	0.000521		785	0.00252951		670	0.00854451
987	0.000522		273	5.65e-05		273	0.000604		1021	0.00357208		49	0.000521		336	0.00252012		671	0.00851782
960	0.00052		309	5.64e-05		912	0.000601		1110	0.00356493		239	0.000515		41	0.00251601		521	0.00851604
532	0.000519		130	5.39e-05		577	0.000596		245	0.00355933		47	0.000511		377	0.00249857		522	0.00846934
350	0.000515		561	5.11e-05		139	0.000596		147	0.00355714		581	0.000502		692	0.00247855		430	0.00846056
995	0.000508		119	4.9e-05		212	0.000592		793	0.00354709		737	0.000496		368	0.00246242		672	0.00844067
376	0.000508		364	4.69e-05		995	0.000591		832	0.00354387		620	0.000493		623	0.00245193		673	0.00843573
315	0.000508		552	4.68e-05		138	0.00059		699	0.00354163		656	0.000493		357	0.00243927		523	0.00842568
790	0.000505		117	4.51e-05		624	0.000579		1054	0.00351673		61	0.00049		476	0.00243796		431	0.00841785
256	0.000503		176	4.4e-05		334	0.000575		242	0.00351519		415	0.000487		950	0.0024379		674	0.00839553
756	0.000503		578	4.38e-05		562	0.000572		149	0.00350976		220	0.000486		501	0.00242936		62	0.00837538
820	0.000502		566	3.88e-05		246	0.000567		636	0.00344559		492	0.000484		619	0.00241372		675	0.00834701
441	0.000501		43	3.51e-05		194	0.000567		362	0.00343362		74	0.000483		276	0.00241025		676	0.00833861
656	0.000501		293	3.29e-05		888	0.000558		399	0.00341879		281	0.000481		358	0.0024066		432	0.00827437
797	0.0005		614	3.15e-05		26	0.000551		288	0.00339604		864	0.000468		294	0.00239797		524	0.00827217
93	0.000499		122	3.14e-05		1013	0.000546		159	0.00339084		599	0.000466		274	0.00239725		63	0.00827138
307	0.000499		620	2.99e-05		438	0.000543		1014	0.00335549		312	0.000464		186	0.00238117		525	0.00820573
330	0.000492		584	2.75e-05		90	0.000542		226	0.00334991		857	0.000462		702	0.00237747		433	0.0081762
369	0.000491		179	2.74e-05		378	0.000537		624	0.00329803		4	0.000462		786	0.00236943		64	0.00816968
2	0.00049		515	2.47e-05		59	0.000526		269	0.00329788		435	0.000457		470	0.00236345		434	0.00813467
950	0.00049		222	2.45e-05		533	0.000519		647	0.00328864		388	0.000453		428	0.00235884		435	0.00811952
192	0.000489		208	2.42e-05		946	0.000517		80	0.00326976		440	0.000453		241	0.00234991		526	0.00811066
569	0.000486		125	2.37e-05		708	0.000516		675	0.00326851		368	0.000451		278	0.00234369		677	0.00805302
975	0.000486		235	2.3e-05		625	0.000508		1138	0.00325692		265	0.00045		789	0.00234296		436	0.0080515
580	0.000485		30	2.29e-05		496	0.000501		150	0.00324998		650	0.000444		790	0.00233463		678	0.00803804
209	0.000478		675	2.23e-05		704	0.000494		101	0.00323498		1006	0.000443		788	0.00232538		65	0.00802564
514	0.000474		414	2.11e-05		291	0.000492		1063	0.00321895		140	0.000442		272	0.00232154		66	0.0080209
301	0.000459		682	1.98e-05		158	0.000491		553	0.00321422		937	0.000442		108	0.0023187		527	0.00801422
1019	0.000458		653	1.6e-05		783	0.000487		1234	0.00321149		986	0.000435		1013	0.00231744		679	0.00801286
388	0.000458		505	1.57e-05		620	0.000484		481	0.00320773		911	0.000425		408	0.00230226		437	0.00800774
30	0.000457		85	1.46e-05		58	0.000483		427	0.00319776		169	0.000424		185	0.00229654		528	0.00800503
419	0.000456		495	1.25e-05		484	0.000482		1108	0.0031899		45	0.000421		882	0.00228888		529	0.00799728
886	0.000456		655	1.17e-05		50	0.000481		1168	0.00318708		759	0.000412		407	0.00228025		530	0.00799654
219	0.000455		455	1.09e-05		175	0.000472		218	0.00316644		407	0.00041		504	0.00227724		67	0.00796618
560	0.000455		257	9.57e-06		936	0.000472		369	0.00315428		560	0.000407		120	0.00226538		438	0.00793189
295	0.000455		527	9.43e-06		960	0.000472		204	0.00315264		574	0.000406		987	0.00226386		68	0.00792368
407	0.000454		576	7.74e-06		950	0.000471		228	0.00314476		273	0.000406		496	0.00225972		439	0.00791505
731	0.000453		617	7.31e-06		485	0.000471		1042	0.00313192		52	0.000404		389	0.0022517		69	0.00791138
862	0.000446		628	5.73e-06		105	0.00047		773	0.00311509		674	0.000403		202	0.00223542		70	0.00790422
140	0.000446		277	5.09e-06		478	0.00047		1024	0.00310243		162	0.000401		567	0.00222688		71	0.00790333
69	0.000443		81	4.96e-06		426	0.000469		156	0.00310183		354	0.000399		118	0.00222507		531	0.00789582
17	0.000443		296	4.14e-06		502	0.000467		1218	0.00309536		698	0.000396		452	0.002222		680	0.0078812
325	0.00044		12	3.71e-06		604	0.000465		312	0.00308179		887	0.000396		364	0.00222013		72	0.00785116
283	0.000439		101	3.66e-06		321	0.000462		936	0.00307509		996	0.000395		271	0.00221026		532	0.00783434
843	0.000439		383	3.15e-06		219	0.000455		411	0.00306716		459	0.000392		507	0.00220992		73	0.00781718
293	0.000438		475	1.92e-06		82	0.000453		1125	0.00306024		17	0.00039		981	0.00220566		533	0.00781425
240	0.000438		654	1.84e-06		68	0.000451		474	0.00303854		317	0.000382		60	0.00219607		534	0.00779635
446	0.000435		218	1.33e-06		806	0.000448		429	0.00301048		408	0.00038		782	0.00217374		74	0.00779058
686	0.000434		133	9.33e-07		56	0.000445		563	0.00299375		503	0.000376		19	0.0021716		681	0.00778968
760	0.000434		444	8.47e-07		172	0.000443		801	0.00298545		227	0.000373		516	0.00215986		682	0.00778174
460	0.00042		285	8.25e-07		61	0.000427		769	0.0029422		608	0.000372		905	0.00215039		440	0.00777423
4	0.000418		90	6.13e-07		937	0.000427		705	0.00293501		302	0.00037		380	0.00211734		441	0.00777234
46	0.000417		289	5.14e-07		511	0.000425		836	0.00292773		142	0.000368		781	0.00211234		442	0.00775723
488	0.00041		25	3.6e-07		302	0.000422		297	0.00292263		683	0.000368		419	0.00209635		443	0.00775062
903	0.000408		356	2.62e-07		451	0.000421		971	0.00291274		259	0.000366		628	0.00209365		535	0.00774219
353	0.000406		226	1.05e-08		885	0.00042		1155	0.00290821		296	0.000363		334	0.00209092		683	0.00773967
291	0.000403		609	7.75e-09		476	0.000417		806	0.00289891		1019	0.000357		751	0.0020899		444	0.00771722
759	0.000399					348	0.000414		198	0.00289766		498	0.000355		510	0.00208983		75	0.00770819
887	0.000397					851	0.000407		1068	0.00289633		624	0.000353		242	0.00207048		76	0.00770427
641	0.000395					402	0.000403		1246	0.00289379		975	0.000352		406	0.00206248		77	0.00769498
717	0.000394					756	0.000401		103	0.00286107		834	0.000348		787	0.00204071		684	0.00769459
897	0.000393					42	0.000398		534	0.00285408		260	0.000347		461	0.0020313		78	0.00768998
162	0.000386					880	0.000392		924	0.00285364		529	0.000347		181	0.00202283		79	0.00768085
177	0.000384					797	0.000389		108	0.00284827		199	0.000343		784	0.00201965		685	0.0076739
864	0.000382					312	0.000386		65	0.00284108		423	0.000341		911	0.00201811		686	0.00767299
406	0.000381					907	0.000382		928	0.00284061		46	0.000341		4	0.00201132		536	0.00766472
771	0.000376					307	0.000382		282	0.00282877		291	0.00034		960	0.00200632		80	0.00766172
450	0.000375					259	0.000377		188	0.0027998		511	0.000337		629	0.0019945		687	0.00766051
823	0.000373					971	0.000376		690	0.00279901		460	0.000336		3	0.0019877		537	0.0076593
208	0.000371					367	0.000373		473	0.00279802		156	0.000335		30	0.00197977		538	0.0076575
617	0.00037					188	0.000373		1127	0.0027904		513	0.000333		880	0.00197732		445	0.00765004
259	0.000362					823	0.000369		999	0.00277559		641	0.000332		273	0.00197646		688	0.00762029
609	0.000361					775	0.000366		1194	0.00274435		783	0.00033		937	0.00197176		539	0.00758925
390	0.000358					353	0.000364		767	0.0027279		207	0.000328		962	0.00195045		540	0.00758811
71	0.000358					450	0.000363		219	0.00272375		775	0.000326		119	0.00194459		81	0.00758743
652	0.000357					596	0.000362		621	0.00271973		738	0.000324		699	0.00193095		689	0.00755508
719	0.000356					501	0.000361		666	0.00269441		350	0.000321		473	0.00192763		446	0.00754391
432	0.000356					471	0.000361		120	0.00269144		380	0.00032		630	0.00191796		82	0.00753469
158	0.000352					847	0.000361		374	0.00265105		522	0.000319		986	0.00189236		83	0.00752397
585	0.000351					590	0.000359		344	0.00263478		177	0.000319		243	0.0018819		447	0.00751994
898	0.000347					200	0.000359		22	0.00263358		472	0.000318		1014	0.00187426		84	0.00746782
677	0.000343					114	0.000358		1242	0.00261998		376	0.000318		371	0.00185026		85	0.00746441
232	0.000342					452	0.000351		755	0.00260043		117	0.000311		1	0.00184636		690	0.00744391
324	0.000336					594	0.000349		530	0.00257364		771	0.000308		528	0.00184309		691	0.00744107
415	0.000336					1014	0.000346		1032	0.00257085		433	0.000304		783	0.00183909		86	0.00744048
187	0.000334					787	0.000346		36	0.00251444		475	0.000297		332	0.00182318		87	0.00743156
44	0.000333					112	0.000345		437	0.00250794		564	0.000296		415	0.00182004		448	0.00742951
98	0.000325					759	0.000343		878	0.00249237		406	0.000296		331	0.00181987		449	0.00739735
142	0.000321					227	0.000342		1093	0.00248962		708	0.000294		457	0.00178571		450	0.00738946
475	0.00032					843	0.000333		341	0.00248356		714	0.000288		752	0.00177802		692	0.00737464
57	0.000315					374	0.000333		1083	0.00247962		776	0.000281		969	0.00176493		541	0.00736864
498	0.000312					159	0.000331		6	0.00247828		451	0.000279		885	0.00176247		542	0.0073643
737	0.000308					712	0.00033		611	0.00244503		208	0.000278		890	0.00175182		88	0.0073566
323	0.000308					249	0.000327		771	0.00244457		295	0.000277		15	0.00174972		543	0.00735335
1013	0.000306					504	0.000326		504	0.00243519		245	0.000275		519	0.00174203		544	0.00732685
607	0.000303					427	0.000324		138	0.00242495		538	0.000267		469	0.00171745		693	0.00730802
453	0.000303					838	0.000317		730	0.00241969		325	0.000264		780	0.00169994		694	0.0072858
193	0.0003					260	0.000317		802	0.0023899		559	0.000262		411	0.00169986		695	0.00727891
564	0.000299					64	0.000316		1149	0.00238105		485	0.000262		447	0.00169633		89	0.00726092
996	0.000296					425	0.000312		1237	0.00237989		44	0.000261		472	0.00168216		545	0.00724326
620	0.000296					863	0.000308		117	0.002376		144	0.000258		5	0.00167899		696	0.00724166
15	0.000292					387	0.000306		919	0.00236724		585	0.000258		1004	0.00167359		697	0.00721212
319	0.000292					187	0.000305		482	0.00234888		432	0.000255		488	0.00165866		698	0.00717444
503	0.000289					276	0.000305		794	0.00234781		358	0.000254		896	0.00164161		699	0.00716579
648	0.000287					555	0.000304		225	0.00234547		1	0.00025		980	0.00163977		546	0.00715531
117	0.000286					356	0.000304		346	0.00233257		419	0.000248		416	0.00163343		90	0.00714331
189	0.000286					1	0.000303		238	0.00233082		375	0.000245		369	0.00163336		700	0.00712448
547	0.000285					967	0.000303		1082	0.00231599		3	0.000242		383	0.00163319		547	0.00710855
451	0.000284					864	0.000301		550	0.00231375		158	0.000241		333	0.00162306		91	0.0070968
472	0.000282					86	0.0003		476	0.00231125		920	0.000241		39	0.00159559		92	0.00708401
231	0.000281					345	0.000299		612	0.00230584		593	0.00024		570	0.00159062		701	0.0070746
593	0.000281					830	0.000297		660	0.00230551		469	0.000239		49	0.00158769		548	0.0070601
3	0.000281					422	0.000297		1219	0.00229327		39	0.000237		974	0.00156882		702	0.00705717
556	0.000279					465	0.000291		113	0.0022875		470	0.000235		475	0.00156792		703	0.00702837
469	0.000274					180	0.000289		94	0.00227923		1013	0.000231		244	0.00155312		549	0.00701998
642	0.000273					598	0.000289		861	0.00227003		163	0.00023		754	0.00154629		93	0.00701983
107	0.000271					984	0.000287		778	0.00226197		209	0.000229		37	0.0015317		550	0.00700447
714	0.000269					60	0.000285		704	0.00225967		69	0.000227		538	0.00152498		704	0.00699132
445	0.000266					317	0.000284		813	0.00223179		946	0.000226		971	0.00151293		551	0.00697822
923	0.000263					310	0.00028		555	0.00221432		484	0.000224		361	0.00150841		94	0.00697107
683	0.000262					729	0.000277		56	0.00221174		390	0.000222		548	0.00150269		552	0.00695499
411	0.000262					199	0.000273		1131	0.00219453		192	0.000219		1017	0.00149956		95	0.00694467
588	0.000261					469	0.000271		642	0.00218738		822	0.000217		983	0.0014945		553	0.00692957
690	0.000258					932	0.000267		933	0.00218508		820	0.000216		1000	0.00148863		705	0.00689831
484	0.000257					986	0.000264		841	0.00218429		756	0.000215		418	0.00146615		96	0.00688849
184	0.00025					252	0.000264		554	0.00216388		556	0.000215		1012	0.00146303		97	0.00687466
218	0.000246					189	0.000264		984	0.00213854		371	0.000214		434	0.00146058		554	0.00687257
45	0.000246					513	0.000263		786	0.00213494		88	0.000214		245	0.00145648		98	0.00684441
827	0.000241					509	0.000261		293	0.00212301		903	0.000213		28	0.00145583		555	0.00683401
1003	0.00024					1009	0.000261		740	0.00210605		452	0.00021		503	0.0014483		706	0.00683113
440	0.000238					79	0.000259		239	0.0020999		219	0.000208		760	0.00144694		99	0.00681732
28	0.000238					690	0.000259		695	0.002079		200	0.000208		757	0.001439		707	0.00681617
127	0.000236					650	0.000256		780	0.00207325		962	0.000207		444	0.00142864		708	0.00677416
829	0.000236					892	0.000254		491	0.00207217		2	0.000202		779	0.00141631		709	0.00675659
582	0.000234					397	0.000251		424	0.00207179		319	0.000201		451	0.00141068		556	0.00675173
62	0.000232					4	0.00025		679	0.00206174		886	0.000201		759	0.00139328		100	0.00673897
763	0.000231					656	0.000249		877	0.00206155		569	0.0002		430	0.00137886		710	0.0067344
529	0.000231					2	0.000249		434	0.00206004		488	0.0002		250	0.00136571		101	0.00673186
144	0.000231					569	0.000248		736	0.00204762		105	0.0002		761	0.00136366		711	0.00672604
113	0.000229					96	0.000245		30	0.00204414		411	0.000193		903	0.00136261		557	0.00669651
170	0.000228					742	0.000245		1124	0.00203349		369	0.000192		874	0.00136034		102	0.00669465
562	0.000228					776	0.000238		364	0.00203168		802	0.000188		247	0.00135434		712	0.00668002
778	0.000227					685	0.000237		361	0.00201679		649	0.000187		1010	0.00135422		558	0.0066702
558	0.000226					94	0.000236		746	0.00201566		951	0.000186		758	0.00135181		103	0.00665785
608	0.000225					201	0.000236		1010	0.00198535		448	0.000186		47	0.00135135		104	0.00663707
229	0.000222					868	0.000234		1061	0.0019822		892	0.000185		872	0.00134449		713	0.0066335
354	0.000221					802	0.000233		735	0.00197048		57	0.000185		764	0.00133647		714	0.00662667
937	0.000219					890	0.000233		622	0.00196166		979	0.00018		532	0.00133603		715	0.00662347
712	0.000217					532	0.000229		713	0.00195569		686	0.000178		778	0.00132243		559	0.00661923
357	0.000215					217	0.000228		12	0.0019502		987	0.000176		753	0.00131347		105	0.00661915
513	0.000215					640	0.000225		1232	0.00194971		993	0.000175		772	0.0013086		560	0.00657016
559	0.000214					116	0.000223		441	0.00194613		356	0.000174		776	0.00129709		106	0.00656242
217	0.000214					41	0.000215		662	0.0019456		229	0.000173		390	0.00129273		716	0.00655194
981	0.000209					457	0.000206		1102	0.00193183		1003	0.000171		777	0.00129273		561	0.00652478
173	0.000208					379	0.000203		1120	0.00192806		668	0.00017		542	0.00129206		562	0.00651278
260	0.000207					284	0.0002		856	0.00192248		471	0.00017		269	0.00126916		107	0.00650684
180	0.000203					350	0.000197		1257	0.00190753		320	0.000168		755	0.00125781		717	0.00650007
230	0.000201					898	0.000196		395	0.00189525		28	0.000168		997	0.00125037		563	0.00645451
697	0.000201					996	0.000195		501	0.00188779		773	0.000168		1009	0.00124305		108	0.00644472
233	0.0002					203	0.000192		597	0.00188224		923	0.000168		267	0.00124243		564	0.00639892
563	0.000199					100	0.000191		1055	0.00186804		48	0.000166		514	0.00123595		109	0.00638204
86	0.000198					979	0.000188		929	0.00186518		112	0.000166		994	0.00123593		110	0.00636737
967	0.000197					906	0.000188		1058	0.00185484		280	0.000165		762	0.00123363		718	0.00636319
865	0.000197					551	0.000185		187	0.00183536		777	0.000162		756	0.0012131		111	0.00633938
273	0.000194					645	0.000185		667	0.00183433		15	0.000161		766	0.00120253		112	0.00629976
533	0.000194					338	0.000184		975	0.00183262		580	0.00016		998	0.00119812		719	0.00629619
245	0.000193					75	0.000184		178	0.00182647		101	0.00016		46	0.00118892		565	0.00629047
777	0.000192					862	0.000182		458	0.0018235		173	0.00016		979	0.00118051		720	0.0062865
348	0.000191					436	0.00018		488	0.00181557		67	0.000157		479	0.00117731		721	0.00628394
1	0.000187					1017	0.000178		1233	0.00180394		255	0.000156		763	0.00117489		722	0.00627746
347	0.000181					20	0.000173		102	0.00179677		898	0.000154		951	0.00116522		566	0.0062749
935	0.00018					715	0.000171		968	0.00178368		963	0.000153		769	0.00116295		113	0.0062667
418	0.000175					142	0.000171		486	0.00177856		445	0.000152		938	0.00116074		567	0.00625171
920	0.000174					778	0.00017		206	0.00175994		232	0.000151		248	0.00113576		723	0.00624765
649	0.000174					14	0.000169		384	0.00175904		729	0.000149		455	0.00113478		724	0.00623979
287	0.000174					592	0.000169		842	0.00175637		761	0.000148		246	0.00112994		568	0.00621769
761	0.000173					3	0.000168		788	0.00174827		461	0.000146		251	0.00110761		114	0.00621722
114	0.000172					470	0.000168		920	0.00173905		533	0.000145		409	0.00110045		569	0.00621241
1014	0.00017					190	0.000167		606	0.0017347		72	0.000143		249	0.00109466		725	0.00619116
101	0.00017					322	0.000166		110	0.00173455		677	0.000143		765	0.001087		726	0.0061902
674	0.000168					23	0.000164		544	0.00173434		932	0.00014		477	0.00105879		727	0.006187
320	0.000168					297	0.000161		453	0.0017319		98	0.000139		268	0.00105565		728	0.00617811
706	0.000163					903	0.000157		61	0.00171947		713	0.000138		482	0.00105081		115	0.00616114
459	0.000161					773	0.000155		908	0.00171322		418	0.000138		413	0.00105067		570	0.00615833
82	0.00016					963	0.000155		1133	0.00170964		353	0.000136		984	0.00104632		729	0.0061492
112	0.00016					483	0.000154		287	0.00169782		244	0.000132		270	0.00104526		571	0.00614808
668	0.000158					80	0.000153		175	0.00169572		582	0.000131		771	0.00104309		730	0.00613995
979	0.000157					446	0.000152		1136	0.00169263		82	0.00013		775	0.0010428		572	0.00612527
435	0.000156					686	0.000152		665	0.00168406		981	0.000125		920	0.00104001		731	0.00610921
221	0.000152					328	0.000148		426	0.00167533		251	0.000123		410	0.0010279		573	0.00609736
471	0.000152					993	0.000147		787	0.00166814		343	0.000121		770	0.00102245		116	0.00608065
255	0.000149					896	0.000147		46	0.00166651		321	0.000119		773	0.00101745		732	0.00605095
986	0.000143					962	0.000144		540	0.00165766		563	0.000119		927	0.00101087		574	0.0060308
105	0.000142					503	0.00014		402	0.00164741		778	0.000119		768	0.00100496		733	0.00603028
124	0.000141					1000	0.000137		614	0.00163453		685	0.000118		474	0.00099		117	0.00602914
944	0.000139					550	0.000137		489	0.00162548		446	0.000118		495	0.000988		118	0.00598361
948	0.000139					253	0.000136		835	0.0016128		37	0.000117		513	0.000985		119	0.00597622
26	0.000138					127	0.000133		375	0.00161142		642	0.000113		562	0.000983		734	0.00597402
425	0.000137					477	0.00013		1030	0.00159643		717	0.000113		464	0.000981		575	0.00594441
313	0.000135					938	0.00013		943	0.00156846		867	0.000112		44	0.000975		120	0.00593009
321	0.000129					761	0.000125		881	0.00155544		476	0.000112		967	0.000967		576	0.00592863
867	0.000128					389	0.000118		274	0.00155316		502	0.000109		556	0.000966		735	0.0059073
818	0.000128					822	0.000118		872	0.00155102		1009	0.000109		559	0.000965		577	0.00588506
72	0.000126					53	0.000117		291	0.00154172		877	0.000108		442	0.000964		578	0.00585247
169	0.000123					948	0.000112		401	0.00153763		437	0.000108		11	0.00096		121	0.00584223
375	0.000122					522	0.000112		367	0.0015375		283	0.000106		258	0.000954		122	0.00583572
280	0.000121					83	0.000108		706	0.00153369		604	0.000105		774	0.00095		736	0.00583449
878	0.00012					295	0.000106		535	0.00152515		386	0.000102		975	0.00095		579	0.00581964
525	0.00012					445	0.000105		246	0.00151828		1020	0.000102		518	0.000939		737	0.00580739
802	0.000119					375	0.000103		1065	0.00151709		673	0.000101		375	0.000933		738	0.00579777
749	0.000119					814	0.000103		1060	0.00151022		958	9.95e-05		45	0.000916		739	0.00578781
327	0.000117					243	0.000103		738	0.00150875		111	9.95e-05		958	0.000905		740	0.00577562
251	0.000113					459	9.95e-05		1	0.00150649		441	9.71e-05		912	0.000901		741	0.00577063
278	0.000113					77	9.94e-05		653	0.00150542		770	9.51e-05		558	0.000901		742	0.00576218
834	0.000113					349	9.89e-05		1235	0.00149342		907	9.5e-05		262	0.000889		123	0.00574726
172	0.000112					472	9.73e-05		931	0.00149288		124	9.43e-05		252	0.000885		124	0.00574335
1000	0.000111					844	9.62e-05		1145	0.0014785		71	9.4e-05		266	0.000884		580	0.00573001
729	0.000109					115	9.53e-05		579	0.00145787		742	9.37e-05		529	0.000883		581	0.00572968
188	0.000108					197	9.5e-05		97	0.00144539		256	9.34e-05		563	0.000872		125	0.00572746
485	0.000105					386	9.44e-05		11	0.00142894		1014	9.31e-05		264	0.000869		126	0.0057122
111	0.000104					248	9.34e-05		1020	0.00141564		755	9.27e-05		694	0.000865		743	0.00567536
317	0.000102					831	9.24e-05		935	0.00137316		843	8.98e-05		932	0.000864		582	0.00567347
378	0.000102					278	9.22e-05		728	0.00136746		551	8.76e-05		57	0.000856		127	0.00566069
912	0.000101					1010	9.2e-05		729	0.00135949		865	8.64e-05		554	0.000846		583	0.00566013
367	0.000101					499	8.84e-05		492	0.00134885		938	8.53e-05		478	0.000844		584	0.00565454
1020	0.000101					771	8.83e-05		487	0.00134464		984	8.49e-05		254	0.000835		744	0.00565388
358	9.84e-05					777	8.62e-05		1184	0.00133043		94	8.33e-05		1002	0.000833		128	0.00564725
495	9.73e-05					987	8.58e-05		251	0.00131346		840	8.33e-05		907	0.000824		129	0.00563869
33	9.65e-05					652	8.54e-05		995	0.00130992		318	8.22e-05		263	0.000816		745	0.00562866
1004	9.63e-05					529	8.5e-05		973	0.00130489		348	8.04e-05		379	0.000815		585	0.00560929
604	9.6e-05					1004	8.41e-05		155	0.00128648		429	8.01e-05		367	0.000804		586	0.00560428
20	9.39e-05					1003	8.35e-05		1252	0.00128431		357	7.91e-05		1011	0.0008		130	0.00559637
984	9.37e-05					283	8.34e-05		602	0.00127429		589	7.86e-05		265	0.000798		131	0.0055919
457	9.36e-05					479	8.31e-05		1007	0.00127152		175	7.85e-05		952	0.000794		132	0.00559168
544	9.34e-05					534	8.29e-05		1199	0.00126315		137	7.81e-05		767	0.000793		587	0.00558145
893	9.31e-05					351	7.88e-05		189	0.00126177		230	7.8e-05		449	0.000783		588	0.00556695
473	9.13e-05					974	7.67e-05		146	0.00125517		483	7.73e-05		261	0.000782		589	0.00554007
379	9.09e-05					641	7.45e-05		337	0.00124661		509	7.7e-05		260	0.000779		746	0.00553634
137	8.81e-05					538	7.38e-05		1129	0.00124298		293	7.69e-05		259	0.000778		133	0.0055114
993	8.67e-05					423	7e-05		418	0.00124179		11	7.58e-05		957	0.000746		747	0.0054994
88	8.33e-05					768	6.93e-05		745	0.00123813		797	7.5e-05		1016	0.000742		590	0.00549614
640	8.19e-05					301	6.9e-05		58	0.00122559		610	7.4e-05		525	0.000737		134	0.00549348
115	8.17e-05					599	6.89e-05		62	0.00121759		409	7.36e-05		253	0.000734		748	0.00548746
594	8.13e-05					981	6.86e-05		1231	0.00120893		26	7.3e-05		402	0.000707		749	0.00548524
220	8.02e-05					869	6.63e-05		79	0.00117867		676	7.29e-05		255	0.000697		591	0.0054817
783	8.02e-05					560	6.53e-05		410	0.00117606		831	7.17e-05		906	0.000697		592	0.00546587
436	7.97e-05					30	6.46e-05		26	0.00117418		866	7.02e-05		256	0.000693		593	0.0054635
522	7.95e-05					826	6.33e-05		467	0.00115288		969	6.98e-05		397	0.000682		594	0.00544701
907	7.82e-05					589	6.24e-05		998	0.00114806		213	6.96e-05		439	0.000657		750	0.00544527
409	7.71e-05					396	6.15e-05		377	0.00114295		129	6.88e-05		417	0.000651		595	0.0053922
1012	7.51e-05					239	6.13e-05		876	0.00113065		113	6.82e-05		382	0.000641		596	0.00536342
551	7.47e-05					738	6.12e-05		1187	0.00112509		1010	6.62e-05		522	0.000608		135	0.0053608
302	7.45e-05					710	6.08e-05		990	0.00112305		333	6.48e-05		523	0.000599		597	0.00533896
773	7.04e-05					659	6.06e-05		652	0.00111871		640	6.32e-05		499	0.000582		136	0.00532715
1017	7.02e-05					231	5.85e-05		278	0.00111405		1016	6.29e-05		970	0.000575		598	0.00532174
574	6.71e-05					536	5.61e-05		526	0.00110277		50	6.28e-05		966	0.000556		137	0.0053115
888	6.62e-05					588	5.53e-05		1173	0.00109886		114	6.22e-05		366	0.000543		138	0.00527096
100	6.31e-05					581	5.51e-05		125	0.00109727		301	6.15e-05		695	0.00054		599	0.00526923
143	6.07e-05					319	5.51e-05		290	0.00109679		379	6.15e-05		386	0.000531		139	0.00525289
673	6.05e-05					829	5.36e-05		1180	0.00109572		396	6.11e-05		31	0.000525		600	0.00522086
438	5.57e-05					1011	5.34e-05		233	0.00109371		110	5.96e-05		961	0.000517		140	0.00520009
974	5.54e-05					325	5.31e-05		733	0.00109308		818	5.92e-05		257	0.000508		141	0.00518857
831	5.37e-05					453	5.26e-05		416	0.00108988		240	5.86e-05		900	0.000503		142	0.00516221
1010	5.37e-05					564	5.22e-05		236	0.00108965		971	5.53e-05		886	0.000491		143	0.00515775
755	5.34e-05					377	5.19e-05		1122	0.00107741		473	5.42e-05		945	0.000481		144	0.00515433
175	5.28e-05					19	5.17e-05		48	0.00107255		438	5.42e-05		993	0.000474		145	0.00512307
483	5.27e-05					448	5.16e-05		917	0.00106262		261	5.25e-05		555	0.000471		146	0.00506361
310	5.01e-05					293	5.06e-05		1192	0.00105715		422	5.19e-05		976	0.00047		147	0.00505572
662	4.9e-05					857	5.04e-05		744	0.0010569		935	5.18e-05		953	0.000468		148	0.00503479
77	4.89e-05					209	4.91e-05		479	0.00105639		243	5.05e-05		985	0.000464		149	0.00502995
589	4.77e-05					858	4.9e-05		1053	0.0010489		364	4.99e-05		23	0.000463		150	0.00500827
396	4.68e-05					206	4.9e-05		923	0.00104304		233	4.82e-05		494	0.000457
994	4.6e-05					466	4.88e-05		1064	0.0010412		967	4.79e-05		696	0.000455
343	4.57e-05					952	4.82e-05		750	0.00104008		278	4.79e-05		433	0.000453
962	4.56e-05					287	4.76e-05		646	0.00102643		86	4.6e-05		926	0.000426
774	4.52e-05					718	4.75e-05		949	0.00102548		594	4.38e-05		396	0.000423
410	4.49e-05					994	4.67e-05		1043	0.00101939		180	4.2e-05		43	0.000415
830	4.44e-05					923	4.59e-05		1003	0.00101741		402	4.19e-05		887	0.000415
676	4.43e-05					229	4.59e-05		1040	0.00100652		1017	4.08e-05		373	0.000411
502	4.33e-05					547	4.55e-05		243	0.00100265		813	4.03e-05		387	0.000411
386	4.03e-05					758	4.55e-05		810	0.000996		763	4.01e-05		948	0.000406
685	3.93e-05					494	4.51e-05		668	0.000995		525	4e-05		544	0.000396
461	3.92e-05					700	4.34e-05		193	0.000992		138	3.88e-05		550	0.000381
238	3.88e-05					71	4.32e-05		927	0.000991		410	3.85e-05		999	0.000369
658	3.87e-05					983	4.31e-05		590	0.000986		127	3.77e-05		944	0.000359
466	3.86e-05					836	4.1e-05		354	0.000984		912	3.71e-05		935	0.000356
592	3.82e-05					28	4.05e-05		681	0.000964		263	3.6e-05		1020	0.000355
906	3.81e-05					15	3.93e-05		760	0.000963		172	3.57e-05		982	0.000355
610	3.77e-05					324	3.9e-05		1169	0.000954		189	3.52e-05		965	0.00035
284	3.69e-05					54	3.89e-05		92	0.000952		899	3.48e-05		432	0.000343
784	3.55e-05					1012	3.8e-05		1236	0.000944		499	3.45e-05		423	0.000341
748	3.53e-05					49	3.63e-05		893	0.000931		457	3.38e-05		897	0.000338
1009	3.38e-05					371	3.48e-05		1034	0.000925		888	3.32e-05		540	0.000331
138	3.36e-05					11	3.43e-05		809	0.000925		547	3.27e-05		450	0.00033
969	3.34e-05					944	3.36e-05		16	0.000917		77	3.23e-05		989	0.000327
825	3.15e-05					748	3.33e-05		607	0.000916		682	2.99e-05		54	0.000322
54	3.05e-05					765	3.25e-05		860	0.000907		658	2.87e-05		437	0.000321
413	3.05e-05					617	3.23e-05		996	0.000904		906	2.79e-05		512	0.000319
148	2.98e-05					676	3.11e-05		904	0.000891		944	2.74e-05		898	0.000298
952	2.87e-05					443	3.1e-05		1244	0.000889		115	2.63e-05		992	0.000291
654	2.84e-05					72	3.1e-05		604	0.000882		758	2.61e-05		941	0.000283
1016	2.76e-05					135	3.02e-05		224	0.000881		413	2.54e-05		968	0.000281
427	2.75e-05					39	2.94e-05		338	0.000858		830	2.5e-05		53	0.000277
239	2.7e-05					74	2.8e-05		792	0.000853		313	2.41e-05		509	0.000276
333	2.56e-05					1016	2.73e-05		808	0.000826		367	2.37e-05		441	0.000267
236	2.49e-05					668	2.73e-05		37	0.000825		75	2.23e-05		972	0.000241
881	2.38e-05					495	2.72e-05		464	0.000823		323	2.21e-05		996	0.000239
32	2.35e-05					169	2.67e-05		415	0.000823		139	2.18e-05		446	0.000226
534	2.31e-05					149	2.62e-05		52	0.000809		894	2.17e-05		440	0.000222
866	2.14e-05					951	2.62e-05		194	0.000808		948	2.13e-05		536	0.00022
129	2.13e-05					267	2.61e-05		868	0.000804		310	2.1e-05		487	0.000218
958	2.12e-05					296	2.58e-05		498	0.000803		221	2.05e-05		20	0.000214
196	2.12e-05					724	2.54e-05		784	0.000794		994	2.03e-05		486	0.000214
448	2.05e-05					682	2.41e-05		761	0.00079		706	1.98e-05		502	0.000212
720	2.01e-05					525	2.41e-05		847	0.000782		247	1.93e-05		32	0.000206
252	1.98e-05					835	2.23e-05		1111	0.000782		104	1.83e-05		395	0.000203
267	1.83e-05					380	2.21e-05		351	0.000777		648	1.79e-05		458	0.000202
938	1.8e-05					57	2.09e-05		303	0.000753		58	1.76e-05		527	0.000201
844	1.78e-05					475	2.04e-05		1066	0.000752		217	1.75e-05		42	0.000199
951	1.77e-05					980	2.04e-05		1070	0.000747		889	1.75e-05		483	0.000196
443	1.74e-05					383	1.99e-05		360	0.000727		974	1.61e-05		1003	0.00019
452	1.72e-05					62	1.97e-05		33	0.000724		980	1.6e-05		58	0.000179
509	1.7e-05					163	1.89e-05		84	0.000722		1004	1.52e-05		56	0.000177
998	1.7e-05					437	1.78e-05		677	0.000722		56	1.48e-05		36	0.000175
536	1.68e-05					69	1.68e-05		879	0.000715		54	1.47e-05		435	0.000171
11	1.51e-05					433	1.68e-05		997	0.000712		204	1.41e-05		566	0.00017
75	1.5e-05					488	1.62e-05		220	0.000706		426	1.38e-05		878	0.000166
53	1.49e-05					207	1.53e-05		190	0.000697		1000	1.36e-05		534	0.00016
42	1.47e-05					998	1.52e-05		527	0.000696		622	1.23e-05		26	0.000156
892	1.45e-05					369	1.39e-05		439	0.000692		998	1.22e-05		50	0.000154
243	1.45e-05					67	1.25e-05		719	0.000692		143	1.15e-05		691	0.000135
499	1.42e-05					255	1.2e-05		1160	0.000686		148	1.13e-05		893	0.000131
770	1.39e-05					763	1.19e-05		296	0.000685		188	9.73e-06		485	0.000129
387	1.24e-05					770	1.15e-05		762	0.000684		96	9.48e-06		445	0.000119
894	1.17e-05					820	1.08e-05		485	0.000682		617	9.38e-06		988	0.000112
253	1.14e-05					818	1.03e-05		116	0.000676		495	9.07e-06		888	0.00011
838	1.14e-05					261	1e-05		1097	0.00067		238	8.75e-06		33	0.000106
247	1.05e-05					755	9.87e-06		934	0.000668		443	7.2e-06		693	9.99e-05
244	9.8e-06					368	9.52e-06		814	0.000667		267	7.17e-06		52	9.42e-05
787	9.54e-06					323	9.41e-06		118	0.000666		844	7.15e-06		995	9.42e-05
104	9.22e-06					111	9.31e-06		298	0.000663		42	6.89e-06		568	8.58e-05
983	8.98e-06					774	8.4e-06		1140	0.000653		707	6.74e-06		378	7.72e-05
476	8.77e-06					46	8.19e-06		1226	0.000646		32	6.7e-06		393	7.49e-05
742	8.32e-06					191	8.18e-06		1045	0.000644		62	6.43e-06		2	7.39e-05
971	7.89e-06					110	7.7e-06		630	0.000643		378	5.77e-06		363	7.08e-05
261	7.77e-06					44	7.51e-06		947	0.000638		425	5.76e-06		936	6.41e-05
150	7.42e-06					232	7.21e-06		779	0.000637		881	5.65e-06		27	6.36e-05
468	7.37e-06					935	7.14e-06		830	0.000633		80	5.53e-06		946	6.04e-05
470	6.79e-06					626	6.74e-06		44	0.000632		287	5.38e-06		48	5.85e-05
708	6.31e-06					333	6.7e-06		263	0.000629		765	5e-06		526	4.08e-05
713	5.41e-06					716	6.69e-06		818	0.000628		466	4.29e-06		462	3.98e-05
83	4.78e-06					622	6.53e-06		1250	0.00062		468	4.12e-06		448	3.67e-05
980	4.73e-06					585	5.51e-06		859	0.00061		724	4.09e-06		372	3.62e-05
263	4.5e-06					813	4.38e-06		390	0.00061		768	3.05e-06		425	3.53e-05
198	4.17e-06					390	4.05e-06		142	0.000607		893	2.98e-06		511	3.51e-05
94	3.27e-06					213	3.95e-06		493	0.000607		983	2.88e-06		484	3.33e-05
422	3.22e-06					47	3.81e-06		29	0.000592		494	2.31e-06		551	3.21e-05
204	3.2e-06					460	3.68e-06		1229	0.000584		83	2.28e-06		17	3.17e-05
709	3.16e-06					468	3.54e-06		241	0.000581		284	2.1e-06		569	2.75e-05
402	3.04e-06					568	3.49e-06		1203	0.000572		654	1.94e-06		436	2.64e-05
429	3.01e-06					195	3.18e-06		313	0.000563		150	1.6e-06		438	2.27e-05
765	3e-06					318	3.16e-06		179	0.00056		748	1.58e-06		429	2.2e-05
877	2.01e-06					473	2.89e-06		734	0.000549		276	1.39e-06		947	2.08e-05
23	1.97e-06					124	2.37e-06		800	0.000542		187	1.3e-06		489	1.99e-05
110	1.61e-06					958	2.18e-06		821	0.000539		427	1.23e-06		384	1.78e-05
96	1.35e-06					134	1.98e-06		1247	0.000531		453	1.13e-06		490	1.63e-05
318	1.3e-06					364	1.88e-06		1181	0.00053		1011	1.01e-06		498	1.29e-05
397	1.05e-06					113	1.81e-06		593	0.000527		100	9.61e-07		500	1.2e-05
622	1.05e-06					256	1.68e-06		803	0.000524		23	9.35e-07		16	1.15e-05
297	9.24e-07					326	1.59e-06		331	0.000519		536	8.17e-07		533	1.14e-05
899	8.8e-07					441	1.1e-06		758	0.000515		701	7.81e-07		547	9.21e-06
139	8.25e-07					45	1.06e-06		163	0.000514		198	7.25e-07		426	8.28e-06
56	7.71e-07					32	7.95e-07		717	0.000514		253	6.58e-07		923	8.09e-06
426	7.08e-07					969	6.64e-07		1170	0.000513		252	5.65e-07		889	7.9e-06
698	6.94e-07					221	5.81e-07		1185	0.000513		592	5.14e-07		422	6.8e-06
50	6.83e-07					263	5.62e-07		983	0.00051		387	4.7e-07		954	6.77e-06
811	6.54e-07					358	5.47e-07		170	0.000502		297	4.32e-07		881	5.26e-06
276	6.43e-07					839	5.27e-07		1172	0.0005		534	3.45e-07		894	4.26e-06
738	3.48e-07					230	3.02e-07		741	0.0005		558	3e-07		388	3.66e-06
682	2.67e-07					37	2.93e-07		628	0.000499		397	2.71e-07		492	3.07e-06
494	2.6e-07					131	2.79e-07		1038	0.000498		709	2.38e-07		24	2.13e-06
758	2.47e-07					313	2.19e-07		960	0.000498		952	1.68e-07		376	1.56e-06
80	2.32e-07					673	1.46e-07		619	0.000493		774	7.96e-08		362	1.21e-06
932	2.28e-07					320	7.68e-08		980	0.000487		436	6.41e-08		560	1.1e-06
707	1.8e-07					580	6.3e-08		463	0.000484		196	4.15e-08		443	7.61e-07
1011	7.77e-08					834	4.26e-08		53	0.000473		562	2.12e-08		892	4.02e-07
768	5.35e-08					210	1.76e-08		605	0.000473		236	1.91e-08		427	3.85e-07
889	4.13e-08					98	1.08e-08		398	0.000472		787	1.83e-08		899	3.68e-07
58	8.96e-09					566	5.76e-09		332	0.000463		53	1.04e-08		877	1.07e-07
701	3.76e-10					104	5.09e-09		264	0.000461		1012	7.92e-09		6	2.87e-08
840	4.31e-12					1020	1.55e-09		651	0.000458		20	1.76e-09		564	6.68e-09
									615	0.000455
									863	0.00045
									1106	0.000442
									772	0.000436
									408	0.000425
									521	0.000425
									682	0.000423
									858	0.000422
									314	0.00042
									823	0.000417
									154	0.000415
									566	0.000414
									1255	0.000408
									89	0.000404
									930	0.000403
									564	0.000397
									565	0.000395
									616	0.000391
									1132	0.000378
									747	0.000371
									223	0.000368
									1037	0.000368
									248	0.000366
									404	0.000366
									599	0.000358
									1163	0.000358
									1104	0.000356
									601	0.000351
									989	0.000349
									1121	0.000341
									991	0.00034
									1041	0.000327
									732	0.000324
									363	0.000317
									944	0.000314
									911	0.000309
									1100	0.000308
									1258	0.000306
									573	0.000302
									552	0.000302
									425	0.000294
									857	0.000288
									452	0.000288
									627	0.000286
									17	0.000283
									921	0.000283
									176	0.000282
									148	0.000276
									93	0.000276
									956	0.000274
									414	0.000273
									1044	0.000264
									305	0.000259
									302	0.000248
									359	0.000246
									727	0.000242
									715	0.00023
									301	0.000226
									870	0.000217
									258	0.000215
									234	0.000213
									871	0.000213
									161	0.000212
									961	0.000208
									430	0.000208
									121	0.000204
									199	0.000204
									680	0.000203
									903	0.0002
									596	0.0002
									112	0.000199
									352	0.000197
									51	0.000195
									365	0.000192
									221	0.000187
									976	0.000183
									50	0.000181
									182	0.000177
									854	0.000169
									237	0.000163
									629	0.00016
									32	0.000159
									853	0.000159
									722	0.000155
									974	0.000154
									158	0.000153
									1005	0.000152
									811	0.000151
									502	0.00015
									436	0.00015
									543	0.00015
									164	0.00015
									533	0.000148
									83	0.000146
									790	0.000146
									212	0.000145
									407	0.000145
									510	0.000145
									292	0.000144
									499	0.000143
									1241	0.000141
									922	0.00014
									107	0.000136
									299	0.000133
									915	0.000129
									132	0.000126
									86	0.000125
									1183	0.000125
									678	0.000123
									1223	0.000122
									438	0.000121
									440	0.000118
									1057	0.000117
									855	0.000115
									95	0.000114
									1069	0.000111
									370	0.00011
									782	0.000109
									589	0.000109
									691	0.000104
									834	0.000103
									422	0.000102
									548	9.92e-05
									1103	9.7e-05
									244	9.68e-05
									87	9.47e-05
									1245	9.36e-05
									1077	9.34e-05
									75	9e-05
									109	8.86e-05
									962	8.44e-05
									281	8.14e-05
									470	8.12e-05
									394	8.05e-05
									1128	7.92e-05
									748	7.65e-05
									137	6.84e-05
									409	6.8e-05
									490	6.46e-05
									310	6.44e-05
									785	6.31e-05
									124	6.21e-05
									457	6.16e-05
									478	6.14e-05
									205	6.02e-05
									1171	6.01e-05
									539	5.79e-05
									749	5.79e-05
									659	5.73e-05
									115	5.68e-05
									1109	5.49e-05
									873	5.35e-05
									143	5.31e-05
									400	5.17e-05
									1105	4.62e-05
									171	4.54e-05
									1046	4.53e-05
									598	4.51e-05
									641	4.44e-05
									916	4.37e-05
									304	4.35e-05
									497	4.24e-05
									349	4.23e-05
									618	4.15e-05
									174	4.1e-05
									726	4.02e-05
									114	3.99e-05
									177	3.94e-05
									49	3.93e-05
									309	3.82e-05
									1006	3.71e-05
									85	3.64e-05
									918	3.63e-05
									538	3.56e-05
									739	3.49e-05
									417	3.4e-05
									412	3.37e-05
									664	3.31e-05
									812	3.27e-05
									789	2.99e-05
									31	2.96e-05
									982	2.81e-05
									864	2.81e-05
									431	2.76e-05
									389	2.72e-05
									791	2.71e-05
									578	2.53e-05
									807	2.47e-05
									494	2.45e-05
									200	2.36e-05
									981	2.23e-05
									38	2.09e-05
									583	1.71e-05
									541	1.71e-05
									275	1.7e-05
									1249	1.68e-05
									345	1.66e-05
									183	1.59e-05
									123	1.58e-05
									537	1.52e-05
									348	1.47e-05
									23	1.1e-05
									326	1.04e-05
									1195	9.08e-06
									603	8.66e-06
									285	8.36e-06
									840	7.97e-06
									74	7.05e-06
									743	6.36e-06
									816	6.03e-06
									447	6.02e-06
									96	5.88e-06
									268	5.68e-06
									350	5.55e-06
									152	5.08e-06
									222	4.57e-06
									714	4.5e-06
									1227	4.22e-06
									874	3.94e-06
									723	2.98e-06
									376	2.86e-06
									1259	2.69e-06
									725	2.65e-06
									162	2.46e-06
									184	2.39e-06
									186	2.16e-06
									663	1.99e-06
									676	1.92e-06
									1186	1.7e-06
									869	1.37e-06
									515	8.13e-07
									817	7.13e-07
									172	4.89e-07
									520	1.92e-07
									240	1.87e-07
									1196	1.51e-07
									503	1.22e-07
									888	1.19e-07
									768	8.95e-08
									423	3.77e-08

## Sheet: Table S1 (B)
Table S1. (B) Silver Yeast
AC			CT			GAC			LD			MAC			NMBAC			EC
index	score		index	score		index	score		index	score		index	score		index	score		index	score
264	0.0375936		229	0.0494308		331	0.038871		448	0.0484855		331	0.0382267		125	0.0510105		751	0.0510105
65	0.0369035		145	0.0314991		65	0.0353711		259	0.0450145		264	0.0381429		218	0.043161		301	0.0494308
309	0.0363575		51	0.031471		264	0.0306705		575	0.0403836		65	0.0330903		405	0.0422833		151	0.0484855
405	0.0357389		105	0.0303451		272	0.0303456		509	0.0402922		309	0.0304694		240	0.0415595		152	0.0450145
406	0.0310898		9	0.0262117		358	0.0298231		512	0.0389722		405	0.0292671		229	0.0391519		752	0.043161
331	0.0306016		2	0.0258336		335	0.0277079		386	0.0368907		179	0.0271149		71	0.0389215		753	0.0422833
179	0.0285947		246	0.024757		309	0.0274016		449	0.0361523		335	0.0261658		61	0.0387911		754	0.0415595
272	0.0260403		82	0.0241559		179	0.0268555		25	0.0353291		272	0.0261381		227	0.0384023		153	0.0403836
215	0.0256637		36	0.0226069		405	0.0267402		466	0.0350506		358	0.0258535		222	0.0379469		154	0.0402922
298	0.0254636		231	0.0216765		125	0.0265801		277	0.0346925		298	0.025103		64	0.0378653		755	0.0391519
125	0.0247444		155	0.020258		298	0.0251945		320	0.0338348		406	0.0243556		309	0.0374671		155	0.0389722
294	0.0229014		322	0.0198082		406	0.02322		574	0.0333323		125	0.0240959		79	0.0373925		756	0.0389215
118	0.0222313		343	0.0171966		294	0.022475		7	0.032219		471	0.0236137		68	0.03737		601	0.038871
335	0.0220972		667	0.0166539		51	0.0211303		327	0.0318518		294	0.0234296		406	0.0373384		757	0.0387911
409	0.0206863		324	0.0150965		79	0.0207617		194	0.031378		258	0.021947		85	0.0371111		758	0.0384023
391	0.0204155		53	0.0139673		258	0.0203343		572	0.0310588		215	0.0213627		146	0.0370237		451	0.0382267
394	0.0201288		331	0.0139513		215	0.019803		516	0.0306645		118	0.0199256		66	0.0367805		452	0.0381429
471	0.0194602		196	0.0138325		332	0.0197957		385	0.0306383		305	0.0194758		235	0.0364042		759	0.0379469
358	0.0191955		8	0.0134718		365	0.0196714		579	0.030418		79	0.0191361		69	0.036393		760	0.0378653
5	0.0191398		684	0.0129982		354	0.019483		95	0.0299296		161	0.0190588		219	0.0361351		1	0.0375936
161	0.0187287		22	0.0125978		381	0.0194128		96	0.0297684		332	0.018435		216	0.0361146		761	0.0374671
79	0.0186411		15	0.012199		145	0.0190394		1224	0.0295897		114	0.0181339		73	0.035913		762	0.0373925
332	0.0184584		228	0.0121359		118	0.0188192		468	0.0290595		51	0.0178849		223	0.0358798		763	0.03737
365	0.0178975		267	0.0118862		305	0.0185693		1098	0.0289262		365	0.017842		75	0.0357612		764	0.0373384
258	0.0177625		337	0.011801		161	0.0182014		594	0.0288457		458	0.0176416		77	0.0356877		765	0.0371111
218	0.0177225		441	0.011765		341	0.0178786		201	0.028467		145	0.0167017		63	0.0355903		766	0.0370237
114	0.0170313		13	0.0116022		114	0.0173163		27	0.028409		5	0.0164063		90	0.0355767		2	0.0369035
51	0.0167279		102	0.0113268		5	0.0170047		30	0.0282067		394	0.0162577		88	0.0353452		156	0.0368907
458	0.0165226		39	0.0109574		356	0.0169589		114	0.0278493		218	0.0160617		70	0.0352392		767	0.0367805
145	0.0157465		171	0.0109264		471	0.0167444		279	0.0278341		409	0.0158177		62	0.0349033		768	0.0364042
119	0.0157162		243	0.0107586		458	0.0167407		260	0.0274033		119	0.0157999		67	0.0348146		769	0.036393
35	0.015165		6	0.0105572		360	0.0167353		442	0.0272724		271	0.0157379		214	0.0347175		3	0.0363575
305	0.0144969		57	0.0104446		394	0.0167196		379	0.0272135		381	0.0156018		72	0.0345283		157	0.0361523
19	0.0144388		195	0.010392		218	0.0166755		1161	0.027084		341	0.0155634		74	0.0340743		770	0.0361351
16	0.0142228		572	0.0101118		271	0.0164546		1078	0.0270019		191	0.015462		231	0.0339984		771	0.0361146
128	0.0140398		247	0.00995056		191	0.0162441		889	0.0264634		391	0.0152656		238	0.0338101		772	0.035913
191	0.0137823		672	0.00989782		635	0.0152832		592	0.026409		139	0.0149158		81	0.0335073		773	0.0358798
448	0.0137376		281	0.00983673		19	0.015101		71	0.02638		354	0.0145175		78	0.0331301		774	0.0357612
299	0.013644		438	0.0096991		508	0.0150465		505	0.0261816		128	0.0144744		84	0.0328841		4	0.0357389
381	0.0135426		439	0.00954131		139	0.0149664		180	0.0260199		19	0.0141008		236	0.0327389		775	0.0356877
139	0.0133222		329	0.0095319		497	0.01476		285	0.0260046		494	0.013959		123	0.0326843		776	0.0355903
494	0.0131869		232	0.0094617		391	0.0147078		70	0.0259715		195	0.0139335		230	0.0324378		777	0.0355767
635	0.0129525		681	0.00941924		49	0.0146548		64	0.0259594		49	0.0137891		87	0.0323857		602	0.0353711
354	0.0126125		110	0.00919193		35	0.0143715		453	0.0259428		448	0.0136043		80	0.0322751		778	0.0353452
271	0.0124946		586	0.00917304		119	0.0138896		568	0.0258381		16	0.0133937		89	0.0322742		158	0.0353291
356	0.0124923		70	0.00912175		338	0.0137696		253	0.0248464		635	0.0133859		127	0.0320263		779	0.0352392
303	0.0121616		574	0.00904119		339	0.0131218		383	0.0247288		35	0.0132059		82	0.0317248		159	0.0350506
239	0.0116172		650	0.00899715		201	0.0131058		1204	0.0242777		58	0.0130992		76	0.0314205		780	0.0349033
434	0.0116023		249	0.00898373		55	0.0130727		1141	0.0242516		497	0.012714		136	0.031391		781	0.0348146
92	0.0114304		87	0.00898275		92	0.013001		1035	0.0234526		841	0.0126535		86	0.0310497		782	0.0347175
841	0.0114193		670	0.00890683		58	0.0129157		323	0.0233137		299	0.0126361		220	0.0307239		160	0.0346925
341	0.011402		183	0.00878993		195	0.0128684		511	0.022668		269	0.0126337		65	0.0306205		783	0.0345283
300	0.0113724		298	0.00872869		274	0.0128658		566	0.0224964		300	0.0125619		234	0.030145		784	0.0340743
508	0.0113714		233	0.00836707		409	0.0127484		446	0.0220448		337	0.0123948		83	0.0299888		785	0.0339984
497	0.0113608		669	0.00826705		841	0.0126992		428	0.021869		356	0.0122117		221	0.0297582		161	0.0338348
575	0.0113123		174	0.00819968		337	0.0126592		264	0.0217391		41	0.0119971		211	0.0287901		786	0.0338101
49	0.0112972		28	0.00813003		351	0.0126047		321	0.0216163		25	0.0115549		228	0.0286923		787	0.0335073
392	0.0112795		55	0.00807913		300	0.0125598		12	0.0214784		55	0.0114751		226	0.0285698		162	0.0333323
76	0.0111975		210	0.00806126		299	0.0124332		528	0.0209993		360	0.0109471		143	0.027907		788	0.0331301
58	0.0109892		254	0.00804447		498	0.0122377		613	0.0209925		329	0.0109144		224	0.0275204		453	0.0330903
25	0.0109167		294	0.00801504		128	0.0121887		195	0.0205144		155	0.0108376		149	0.0273144		789	0.0328841
41	0.0108825		147	0.00800416		509	0.0118527		243	0.0201108		508	0.010663		232	0.0270808		790	0.0327389
414	0.0108723		18	0.00799821		16	0.0118477		284	0.0195571		338	0.010632		391	0.0268702		791	0.0326843
360	0.0107781		10	0.00792455		233	0.0118068		909	0.0194703		339	0.010605		635	0.0267348		792	0.0324378
339	0.0107722		24	0.00785831		85	0.0117789		262	0.0191248		92	0.0104496		305	0.026518		793	0.0323857
237	0.0107121		651	0.0078019		379	0.0116351		261	0.0187878		85	0.0103911		212	0.0264241		794	0.0322751
337	0.0106995		153	0.00771444		91	0.0113485		1015	0.0184894		470	0.0103847		409	0.026404		795	0.0322742
195	0.0106313		167	0.0076542		269	0.0109742		480	0.0184771		91	0.0103514		303	0.0258441		163	0.032219
55	0.0105032		582	0.00759245		244	0.0109315		134	0.0178024		375	0.0101815		155	0.0257354		796	0.0320263
407	0.0104846		686	0.00726306		251	0.0108574		72	0.0176363		575	0.010071		225	0.0253471		164	0.0318518
269	0.0102745		193	0.00725697		25	0.0108136		205	0.0175167		328	0.00998633		217	0.0253262		797	0.0317248
410	0.0102537		425	0.00717306		178	0.0106841		270	0.0175053		434	0.00998051		159	0.0248723		302	0.0314991
155	0.0100151		181	0.00711319		275	0.0105467		972	0.0173492		274	0.00988358		394	0.0247776		303	0.031471
317	0.00990329		514	0.00706452		494	0.0105053		700	0.0172637		76	0.00973832		147	0.0244672		798	0.0314205
328	0.00976035		185	0.00704471		334	0.0105023		460	0.0170885		379	0.00973257		176	0.0243622		799	0.031391
393	0.00965264		23	0.00701826		575	0.0104303		376	0.0166267		452	0.00969916		326	0.0241501		165	0.031378
372	0.00948501		270	0.00700551		41	0.010371		637	0.0161773		237	0.00953549		213	0.0241428		5	0.0310898
26	0.00942358		326	0.0069785		97	0.0103176		316	0.0161459		334	0.00951704		310	0.0239879		166	0.0310588
338	0.0093993		27	0.006939		448	0.010059		339	0.0160533		178	0.00950866		151	0.0239769		800	0.0310497
545	0.00919907		242	0.0069305		155	0.00994075		131	0.0159789		154	0.00937073		122	0.0239412		801	0.0307239
85	0.00903734		64	0.00691712		545	0.00991139		369	0.0159232		188	0.00936669		304	0.0236526		603	0.0306705
233	0.00902209		132	0.00676203		154	0.00987375		520	0.015769		565	0.00931171		448	0.0233141		167	0.0306645
274	0.00899118		567	0.00673843		188	0.00963557		586	0.015681		26	0.00920227		233	0.0227743		168	0.0306383
565	0.0089774		150	0.00669758		375	0.00960706		952	0.0156121		249	0.00919267		138	0.022696		802	0.0306205
229	0.0089086		427	0.00667336		424	0.00936496		900	0.0152163		781	0.00910865		166	0.0223877		6	0.0306016
295	0.00888064		319	0.00654578		26	0.00933262		127	0.015199		371	0.00900074		172	0.0222302		454	0.0304694
178	0.00885392		635	0.00646692		76	0.00926503		390	0.0150603		498	0.00897049		164	0.022124		169	0.030418
249	0.00870497		95	0.00644614		452	0.00923007		47	0.0148854		97	0.008948		237	0.0219828		604	0.0303456
509	0.0084167		445	0.00638994		277	0.00918355		311	0.0148418		414	0.00891824		577	0.0217832		304	0.0303451
584	0.00832588		437	0.00635294		237	0.00912197		73	0.0148334		265	0.0088858		168	0.0217591		803	0.030145
371	0.00826826		148	0.00627025		781	0.0091039		280	0.0146948		509	0.00875678		584	0.0213983		804	0.0299888
498	0.00824753		109	0.00622647		265	0.00892145		529	0.0146574		244	0.00874162		152	0.0213363		170	0.0299296
265	0.00822656		358	0.0061347		81	0.00868836		1089	0.0145004		545	0.0087302		130	0.0211776		605	0.0298231
146	0.008215		180	0.00605162		50	0.00853942		720	0.0144987		410	0.00850844		132	0.0211454		171	0.0297684
655	0.00810495		69	0.00604535		371	0.00845492		94	0.0144607		505	0.00842958		129	0.0210813		805	0.0297582
240	0.00808911		140	0.00597082		875	0.00842482		451	0.0144051		295	0.00839479		153	0.0210334		172	0.0295897
154	0.00803195		59	0.00596316		392	0.00836024		331	0.0141896		146	0.00838269		580	0.0208662		455	0.0292671
91	0.00801351		537	0.00594655		148	0.00835683		610	0.0141385		131	0.00837377		581	0.0207973		173	0.0290595
131	0.00799771		602	0.00592068		390	0.00835403		356	0.0139352		601	0.0083123		574	0.020715		174	0.0289262
375	0.00799018		106	0.00574866		601	0.00830554		403	0.0138653		326	0.00830215		157	0.0204792		175	0.0288457
379	0.00797112		504	0.00562281		239	0.00829757		1152	0.0138151		227	0.00815828		158	0.0204524		806	0.0287901
159	0.00793725		525	0.00561105		434	0.00808939		133	0.0138091		655	0.00808231		239	0.0202974		807	0.0286923
470	0.00785083		534	0.0055956		295	0.00808136		459	0.0137045		201	0.0080273		588	0.0201067		7	0.0285947
86	0.00781864		50	0.00550525		141	0.00798599		1096	0.0136963		290	0.00795809		595	0.0200525		808	0.0285698
290	0.00775984		588	0.00549322		359	0.00788513		257	0.0136037		235	0.00793864		591	0.0199499		176	0.028467
326	0.00775416		217	0.00548579		372	0.00773389		91	0.0135676		233	0.00793531		585	0.0198607		177	0.028409
420	0.00768506		550	0.00541899		485	0.007704		22	0.013557		392	0.00788298		571	0.0198436		178	0.0282067
334	0.00768257		666	0.00516871		565	0.00764577		218	0.0134628		251	0.00783335		162	0.0198237		809	0.027907
457	0.00755552		442	0.00513705		496	0.00755766		1215	0.013448		584	0.00778374		133	0.019786		179	0.0278493
81	0.00755418		271	0.00500688		159	0.00749028		523	0.0131515		229	0.00772416		573	0.0196016		180	0.0278341
505	0.007486		98	0.00500101		416	0.00733422		291	0.0130458		407	0.00765283		163	0.0195855		606	0.0277079
188	0.00747249		644	0.00499198		250	0.00733086		591	0.0130208		240	0.00760387		19	0.0195719		810	0.0275204
227	0.0073964		287	0.00495051		303	0.00720853		510	0.0129206		176	0.0075537		173	0.0195279		181	0.0274033
275	0.0073585		237	0.00494842		457	0.00717786		15	0.0127729		239	0.00751454		572	0.0193105		607	0.0274016
310	0.00731101		544	0.00492541		734	0.00705663		561	0.012753		159	0.00746515		598	0.0192904		811	0.0273144
884	0.00729904		390	0.00485853		727	0.00705311		1090	0.012727		891	0.00743421		180	0.0192844		182	0.0272724
415	0.00727744		493	0.00483249		248	0.00700707		583	0.0125983		884	0.00740089		174	0.0192515		183	0.0272135
875	0.0071836		67	0.00479647		695	0.00700358		81	0.0124924		415	0.00739036		167	0.0192323		456	0.0271149
781	0.00716197		649	0.00475522		407	0.00690642		465	0.0124057		457	0.0073774		596	0.0192323		184	0.027084
416	0.00708789		583	0.00471033		95	0.00683714		783	0.0123911		372	0.00727538		170	0.0191832		812	0.0270808
452	0.00693613		466	0.00466822		146	0.00682956		565	0.0123535		81	0.00725885		592	0.0191802		185	0.0270019
480	0.00691595		365	0.00466364		270	0.00678723		338	0.0122575		275	0.00725758		169	0.0191798		813	0.0268702
304	0.00690979		264	0.00465267		584	0.00677394		397	0.012179		875	0.00719027		124	0.0190031		608	0.0268555
97	0.00688535		160	0.00463765		503	0.00676622		531	0.0121413		303	0.00716796		165	0.018966		609	0.0267402
270	0.00680852		589	0.00461445		488	0.00674702		826	0.0121207		148	0.00710448		576	0.0189323		814	0.0267348
891	0.00668721		137	0.00460995		664	0.00673844		907	0.012		270	0.0070939		587	0.0189173		610	0.0265801
251	0.00661537		224	0.00455625		210	0.00672991		52	0.0119444		277	0.00701656		578	0.0189141		815	0.026518
515	0.00660052		392	0.00450978		249	0.00672405		522	0.0117677		351	0.00699638		590	0.0188456		186	0.0264634
176	0.00658804		509	0.00449579		414	0.00671867		1222	0.0117537		412	0.00699049		318	0.018808		816	0.0264241
156	0.00653487		3	0.00448654		156	0.00647975		168	0.011745		424	0.00693522		582	0.0187521		187	0.026409
601	0.00652872		338	0.00447068		176	0.00643367		573	0.0116925		480	0.00692981		579	0.0187008		817	0.026404
524	0.006527		1	0.00446347		140	0.00638874		488	0.0115379		815	0.00692687		583	0.018605		188	0.02638
644	0.00646907		223	0.00428793		393	0.00636241		1200	0.011518		664	0.00689991		599	0.0186015		305	0.0262117
411	0.00645536		202	0.00425457		380	0.00636015		577	0.0114341		443	0.00674943		600	0.0185453		189	0.0261816
412	0.00634188		77	0.00422491		131	0.00632954		1074	0.0113595		261	0.00674096		586	0.0184763		457	0.0261658
443	0.0063108		539	0.00422245		396	0.00632202		149	0.0113504		50	0.00672622		594	0.0184727		458	0.0261381
201	0.00630761		420	0.00422026		206	0.00630571		213	0.0113435		644	0.00664232		175	0.0184575		8	0.0260403
244	0.00626053		554	0.00418413		470	0.00628564		169	0.0113203		524	0.006545		589	0.0184188		190	0.0260199
577	0.00622046		88	0.00409789		480	0.00626234		549	0.0113178		390	0.00652234		171	0.0183517		191	0.0260046
451	0.00621706		341	0.00405935		667	0.00622739		500	0.0112491		485	0.00649969		593	0.0180441		192	0.0259715
83	0.00621009		553	0.00401933		515	0.00617868		68	0.0112315		416	0.00640466		597	0.018		193	0.0259594
424	0.00617006		301	0.0040061		254	0.00614929		629	0.0111911		819	0.00628051		575	0.0179317		194	0.0259428
402	0.00612258		410	0.00399749		290	0.00598177		547	0.0111112		849	0.00627104		160	0.017841		459	0.0258535
148	0.00607546		65	0.00399423		891	0.00594182		1198	0.011095		86	0.00624835		646	0.0177651		818	0.0258441
496	0.00603924		219	0.00396051		884	0.00593598		402	0.0110019		734	0.00616072		142	0.0177		195	0.0258381
261	0.00600644		100	0.00395709		410	0.00591771		1205	0.0109839		420	0.00614474		154	0.017669		306	0.0258336
346	0.0059288		37	0.00395559		815	0.00590611		1191	0.0108877		156	0.00609344		177	0.0175724		819	0.0257354
390	0.00591263		505	0.00395421		235	0.00585643		123	0.0108662		496	0.00604561		323	0.0173793		9	0.0256637
351	0.00590598		251	0.00393391		696	0.00585047		901	0.0107451		393	0.00600734		156	0.0171415		10	0.0254636
141	0.00576945		255	0.00392963		123	0.00581339		138	0.0107175		870	0.00596986		312	0.0171089		820	0.0253471
140	0.00567246		156	0.00390188		214	0.00577183		655	0.0105621		704	0.00591299		137	0.0170308		821	0.0253262
23	0.00565135		253	0.00386034		443	0.00577163		372	0.0105522		209	0.0058576		302	0.0170026		611	0.0251945
277	0.00564901		74	0.00378803		216	0.00575212		334	0.0105373		515	0.00584881		657	0.0169396		460	0.025103
485	0.00559314		332	0.00373401		208	0.00574621		60	0.0104734		727	0.00569823		301	0.0169172		822	0.0248723
329	0.00558338		96	0.00372819		343	0.00573441		355	0.0104681		141	0.00569402		643	0.0168245		196	0.0248464
849	0.00558075		382	0.00372733		199	0.00572757		1190	0.010412		140	0.00567609		638	0.0167817		823	0.0247776
396	0.00554495		500	0.00371879		655	0.00569933		122	0.0103859		396	0.00566452		126	0.0167199		307	0.024757
50	0.00544417		660	0.0036396		346	0.0056731		892	0.0103521		667	0.00564073		215	0.0166923		11	0.0247444
918	0.00536921		120	0.00359927		261	0.00566606		358	0.0103314		835	0.00562231		414	0.0166607		197	0.0247288
796	0.00535801		327	0.00356674		136	0.00565322		1142	0.0103015		3	0.00552641		653	0.0166262		824	0.0244672
870	0.00534969		16	0.00355163		808	0.00553855		405	0.010269		83	0.00552571		322	0.0166134		825	0.0243622
704	0.00523757		679	0.00354784		340	0.00553196		1	0.0102568		695	0.00544729		330	0.0165939		461	0.0243556
3	0.00522858		528	0.00353454		3	0.00545891		67	0.0102495		842	0.00530305		407	0.0164567		198	0.0242777
664	0.00522639		306	0.00351514		355	0.00545843		200	0.0102228		254	0.00529168		324	0.0162691		199	0.0242516
209	0.00522261		354	0.00349392		524	0.00540507		1016	0.0102092		216	0.00529127		636	0.0159927		308	0.0241559
254	0.00518197		680	0.00343325		553	0.00538231		271	0.0101832		918	0.00522036		178	0.0159736		826	0.0241501
399	0.00514328		685	0.00342896		399	0.00537248		885	0.0100275		23	0.0052054		121	0.0159636		827	0.0241428
808	0.00510058		379	0.00340949		819	0.00536201		831	0.0099756		402	0.00520261		410	0.0158321		462	0.0240959
192	0.00502275		239	0.00339642		918	0.00532887		1137	0.00996783		175	0.00518515		647	0.015826		828	0.0239879
520	0.00500185		252	0.00336609		94	0.00530796		1081	0.00988316		123	0.00514321		392	0.0157577		829	0.0239769
95	0.00492834		81	0.00332676		412	0.00525175		1079	0.0098153		399	0.00509751		161	0.0156856		830	0.0239412
123	0.00492465		222	0.00331142		415	0.00521664		106	0.00978451		222	0.00506526		135	0.0156454		831	0.0236526
71	0.00487803		83	0.00330823		175	0.00517606		99	0.00963085		346	0.00498061		316	0.0155719		463	0.0236137
517	0.00486515		226	0.0032873		402	0.00516367		1216	0.00962176		136	0.0049539		642	0.0153679		200	0.0234526
455	0.00482094		434	0.00328222		780	0.00512851		105	0.0096136		915	0.00494997		25	0.0152143		464	0.0234296
842	0.00480131		122	0.00325216		86	0.00512263		1135	0.00950139		455	0.00494943		639	0.0151111		832	0.0233141
160	0.00476814		250	0.00324205		915	0.00505298		481	0.00949871		520	0.00488286		365	0.0150901		201	0.0233137
734	0.00476776		585	0.00320556		882	0.00503644		648	0.00943691		214	0.00488111		35	0.0146923		612	0.02322
835	0.00476124		407	0.00318064		186	0.00492147		145	0.00941748		780	0.00483971		311	0.014365		12	0.0229014
136	0.00475179		131	0.00316978		23	0.00491499		1009	0.00940569		317	0.0048301		649	0.0141311		833	0.0227743
695	0.00472471		345	0.00315683		227	0.00490353		491	0.00934755		250	0.00482537		306	0.0140587		834	0.022696
727	0.00470005		308	0.00315314		451	0.00489258		1011	0.00934432		284	0.0048072		134	0.0140225		202	0.022668
628	0.00468223		235	0.00311858		467	0.00489071		322	0.00934396		711	0.00478831		393	0.0139123		309	0.0226069
780	0.00466273		663	0.00306902		240	0.00487955		197	0.00933715		451	0.00474301		424	0.0138809		203	0.0224964
291	0.00464346		662	0.00301477		849	0.00485529		891	0.00933415		577	0.00474253		443	0.0137785		613	0.022475
882	0.00461238		280	0.00297358		329	0.00484746		26	0.0092959		95	0.0047401		494	0.013517		835	0.0223877
474	0.0045892		85	0.00296956		455	0.00482397		694	0.00928844		808	0.0046788		313	0.0133642		13	0.0222313
296	0.00458171		12	0.00292327		127	0.00480655		396	0.00928727		160	0.00464534		633	0.0131733		836	0.0222302
286	0.00453711		154	0.00290434		333	0.00476092		206	0.0092843		71	0.00463392		420	0.0131498		837	0.022124
115	0.00451206		646	0.00288654		842	0.00475051		614	0.00925766		291	0.004571		144	0.0131003		14	0.0220972
210	0.00450637		163	0.00288429		425	0.00464949		283	0.00923456		488	0.00456298		659	0.0129		204	0.0220448
667	0.00450583		194	0.00286432		644	0.00461566		256	0.00923427		389	0.00451843		179	0.0128017		838	0.0219828
915	0.00450373		551	0.0028626		388	0.00460402		514	0.0092152		517	0.00450883		307	0.0127678		465	0.021947
904	0.00443295		423	0.00283226		628	0.00458648		10	0.00919223		553	0.00447503		327	0.0127518		205	0.021869
747	0.00438871		353	0.00282392		185	0.00457694		609	0.00918201		696	0.00444734		451	0.0127517		839	0.0217832
46	0.00435606		168	0.00281753		166	0.0044865		388	0.00914414		120	0.00440849		415	0.0127025		840	0.0217591
389	0.00432099		508	0.00280686		796	0.00443131		33	0.00907942		403	0.00439297		325	0.0120651		206	0.0217391
895	0.00431067		201	0.00280559		345	0.00439386		1207	0.00904011		796	0.00438287		819	0.011924		310	0.0216765
637	0.00430856		256	0.00278584		33	0.00437442		1072	0.00903826		186	0.00435214		660	0.0118267		207	0.0216163
553	0.00427413		323	0.00275888		505	0.0043703		292	0.00903534		474	0.00431235		632	0.0118235		208	0.0214784
248	0.00427067		665	0.00275854		83	0.0043695		1159	0.00896657		248	0.00430594		815	0.0117163		841	0.0213983
616	0.0042613		21	0.00275205		328	0.00436471		701	0.00889601		747	0.00428802		191	0.0116748		466	0.0213627
586	0.00415149		186	0.00274384		638	0.00435124		1148	0.00886469		185	0.00426296		650	0.0116682		842	0.0213363
403	0.00413974		206	0.00273104		284	0.00432946		963	0.0088333		628	0.00422535		319	0.01156		843	0.0211776
909	0.00409323		546	0.00272417		318	0.00432628		1076	0.00877228		115	0.00420844		308	0.0114858		844	0.0211454
359	0.00409104		125	0.00271451		150	0.00430803		276	0.00873867		325	0.00419322		315	0.0114509		614	0.0211303
222	0.00405439		406	0.00270636		90	0.00429688		59	0.00872752		380	0.00419273		112	0.0114475		845	0.0210813
27	0.0040535		114	0.00269775		420	0.00427528		115	0.00871082		476	0.00417006		320	0.0113844		846	0.0210334
185	0.0040466		510	0.00268511		120	0.00425483		342	0.00869099		333	0.00409924		411	0.0113746		209	0.0209993
465	0.00400964		99	0.00267786		904	0.00424295		88	0.00868468		895	0.0040959		631	0.0111901		210	0.0209925
340	0.00398826		532	0.00263058		229	0.00424133		890	0.00861447		904	0.00403237		654	0.0111085		847	0.0208662
380	0.00395293		496	0.00260071		1	0.00423057		167	0.00856788		411	0.0040115		412	0.0110805		848	0.0207973
856	0.00393356		367	0.00258119		909	0.00416035		209	0.00856389		33	0.00398413		652	0.0110091		615	0.0207617
111	0.00387026		398	0.00255053		577	0.00414814		612	0.00854733		637	0.00395007		467	0.0109487		849	0.020715
216	0.0038158		277	0.0025467		704	0.00413685		883	0.00853534		111	0.00393594		402	0.0109336		15	0.0206863
696	0.0038022		342	0.00254297		702	0.00406354		837	0.00852568		143	0.00392613		314	0.0104647		211	0.0205144
488	0.0037978		26	0.00253511		586	0.00404988		34	0.0085178		586	0.0039094		104	0.0104621		850	0.0204792
225	0.0037881		573	0.00252434		772	0.00402289		51	0.0084194		554	0.00389675		812	0.0101521		851	0.0204524
819	0.00378778		123	0.00252152		643	0.00400955		1013	0.00839861		349	0.00388771		113	0.00993912		16	0.0204155
175	0.00374482		113	0.00251617		403	0.00400553		188	0.00837149		688	0.00384374		195	0.00993338		616	0.0203343
552	0.00372529		205	0.00251512		876	0.00397793		124	0.00836633		345	0.00381481		833	0.00991487		852	0.0202974
235	0.00371889		282	0.00250921		552	0.00395217		1153	0.00836572		909	0.00381264		831	0.00986034		311	0.020258
554	0.00370928		674	0.00249851		517	0.00394459		1027	0.00836256		882	0.00381066		108	0.00985582		17	0.0201288
711	0.00368334		330	0.00248544		520	0.00393136		657	0.0083224		208	0.00375224		100	0.00983497		212	0.0201108
815	0.00368068		352	0.00247009		222	0.00387515		846	0.00830837		343	0.00374474		676	0.00978632		853	0.0201067
217	0.00363828		564	0.00246658		476	0.00377795		536	0.00827088		47	0.0037446		656	0.00972178		854	0.0200525
120	0.00362409		503	0.00246405		115	0.00377737		421	0.00822336		856	0.00373945		476	0.00962994		855	0.0199499
94	0.00362247		517	0.00245945		646	0.00377478		1211	0.00813631		310	0.00373279		396	0.0095972		467	0.0199256
526	0.00359927		208	0.00243526		548	0.00374074		8	0.00812428		821	0.00371807		837	0.00955151		856	0.0198607
143	0.00359359		371	0.00243003		104	0.0037146		1026	0.00811225		304	0.00366311		727	0.00954708		857	0.0198436
503	0.00356204		41	0.00242374		688	0.00369247		1206	0.00804879		404	0.00365014		109	0.00950772		858	0.0198237
166	0.00354698		630	0.00241641		304	0.00367196		1080	0.00803862		94	0.00364128		669	0.0094605		312	0.0198082
547	0.00352734		34	0.00241586		404	0.00366562		1143	0.00798174		210	0.00363711		497	0.0094247		617	0.019803
56	0.0034712		212	0.00240482		27	0.00366384		1139	0.00798125		1	0.00360953		399	0.00942326		618	0.0197957
901	0.00346982		529	0.00239521		810	0.00364636		21	0.00797261		199	0.0036062		461	0.00940699		859	0.019786
688	0.00346928		463	0.00238222		526	0.00364308		190	0.0079499		90	0.00358213		672	0.0093666		619	0.0196714
702	0.00346722		48	0.00235495		310	0.0036425		53	0.00784019		467	0.00357929		51	0.0093184		860	0.0196016
580	0.00346338		522	0.00235041		870	0.00363129		469	0.00781834		368	0.003569		661	0.00930762		861	0.0195855
772	0.00343971		610	0.00234905		160	0.00362275		255	0.0078157		359	0.00356453		99	0.00924769		862	0.0195719
576	0.00342192		568	0.00233064		88	0.00361919		763	0.00772361		38	0.00355784		813	0.00923028		213	0.0195571
284	0.00341219		221	0.00230532		385	0.00358358		1146	0.00770436		526	0.00352483		663	0.00918411		863	0.0195279
467	0.00338819		453	0.00228862		71	0.00356		1002	0.00769627		772	0.00350258		103	0.0091838		620	0.019483
38	0.00334826		92	0.00228254		325	0.00353642		957	0.00769239		104	0.0035001		734	0.0091352		468	0.0194758
1	0.003334		664	0.00227823		366	0.00349087		472	0.00768266		388	0.0034793		645	0.00910431		214	0.0194703
33	0.00331632		485	0.00222372		47	0.00347487		1202	0.0076795		465	0.00346849		662	0.00907603		18	0.0194602
72	0.00327964		312	0.00222055		225	0.00343604		585	0.00766729		674	0.00345944		508	0.00900005		621	0.0194128
591	0.00327097		613	0.00220841		445	0.00343571		554	0.00758249		484	0.00343043		105	0.00898425		864	0.0193105
343	0.00326818		279	0.00219062		578	0.00341454		696	0.00748023		27	0.00342769		666	0.00892574		865	0.0192904
150	0.00326522		351	0.00216812		291	0.00341067		66	0.00746807		425	0.00342597		665	0.00892394		866	0.0192844
345	0.00326415		284	0.00215909		357	0.0033818		75	0.00743967		127	0.00340902		372	0.00888223		867	0.0192515
213	0.00326216		47	0.00215278		738	0.00337007		340	0.00740735		503	0.00339519		690	0.00880638		868	0.0192323
595	0.00325454		536	0.00213651		253	0.00336299		527	0.00739634		206	0.00338373		102	0.0086976		869	0.0192323
2	0.0032526		565	0.00212318		501	0.00334921		457	0.00739245		46	0.00337983		101	0.00866003		19	0.0191955
579	0.00324504		498	0.00208009		835	0.003349		1209	0.00733323		340	0.00335467		840	0.00864201		870	0.0191832
250	0.00323579		575	0.00207447		745	0.00332494		219	0.00728423		595	0.00334026		658	0.00864185		871	0.0191802
491	0.00322138		604	0.00207122		657	0.00330888		475	0.00726468		901	0.00330399		329	0.00864036		872	0.0191798
127	0.00322003		244	0.00205764		279	0.00326426		173	0.00725524		150	0.00326914		456	0.00863761		20	0.0191398
957	0.00319671		394	0.0020574		579	0.00325485		19	0.00721594		616	0.003247		454	0.00863737		469	0.0191361
368	0.00318154		339	0.00205721		200	0.00322883		286	0.0071894		166	0.00324462		93	0.00858689		215	0.0191248
442	0.00317408		632	0.00203849		46	0.00322279		357	0.00718206		810	0.00323128		381	0.00858247		470	0.0190588
186	0.00317003		475	0.00201141		583	0.00319725		752	0.00718061		296	0.00320269		188	0.0085217		622	0.0190394
106	0.00315809		104	0.00199949		607	0.00318241		181	0.00703221		552	0.00319664		321	0.00850946		873	0.0190031
810	0.00311216		126	0.00199706		350	0.00317607		1001	0.00703175		56	0.00317618		679	0.00850138		874	0.018966
90	0.00310111		349	0.00199021		698	0.0031693		13	0.00702682		580	0.00316093		117	0.00849313		875	0.0189323
877	0.00310045		262	0.0019487		616	0.00316723		1144	0.00696275		588	0.00312446		678	0.00844796		876	0.0189173
47	0.00308477		436	0.00194689		576	0.00316415		87	0.00693157		745	0.0031027		131	0.0084318		877	0.0189141
876	0.00305905		203	0.0019382		901	0.00315238		643	0.00690931		475	0.00308744		721	0.00841799		878	0.0188456
62	0.0030503		593	0.00191121		878	0.00314612		887	0.00687797		876	0.00308377		107	0.00841125		623	0.0188192
528	0.00300986		357	0.00190133		922	0.00313329		711	0.00683131		528	0.0030404		634	0.00840918		879	0.018808
445	0.00300052		571	0.00188734		63	0.0031236		498	0.00682714		738	0.00300062		668	0.00837804		216	0.0187878
583	0.00299148		389	0.00187462		419	0.00311799		550	0.00682167		88	0.00297958		818	0.00836187		880	0.0187521
333	0.00299052		369	0.00186239		674	0.00307608		590	0.00680222		854	0.00297444		98	0.00830862		21	0.0187287
521	0.00297872		307	0.00186224		389	0.00306142		1033	0.00678956		149	0.00296642		680	0.00827679		881	0.0187008
149	0.00297723		146	0.00185753		747	0.00304525		132	0.00674982		638	0.00293769		677	0.00826347		22	0.0186411
495	0.00296405		297	0.00183229		636	0.00304231		454	0.00674848		192	0.00293333		814	0.00823741		882	0.018605
588	0.00295829		458	0.0018272		465	0.00303407		702	0.0067452		547	0.00292935		150	0.00820001		883	0.0186015
206	0.00295013		238	0.00182357		193	0.00302651		151	0.00673826		607	0.00292932		827	0.00817612		624	0.0185693
318	0.00294738		340	0.00181696		588	0.00302144		18	0.00673678		578	0.00290078		823	0.00816638		884	0.0185453
88	0.00293399		457	0.00181464		595	0.00300297		492	0.00665669		576	0.00287157		832	0.00809651		217	0.0184894
53	0.00288382		162	0.00179072		934	0.00297986		104	0.00664935		302	0.00283374		403	0.0080863		218	0.0184771
968	0.00286783		321	0.00178944		296	0.00296982		886	0.00663754		321	0.00282015		682	0.00805202		885	0.0184763
104	0.00284767		211	0.0017725		784	0.00295336		394	0.00661806		579	0.00279418		673	0.0080508		886	0.0184727
419	0.00283219		272	0.0017437		711	0.00294102		305	0.00660504		548	0.00279312		738	0.00803342		23	0.0184584
447	0.00282665		413	0.00174093		474	0.00291444		815	0.00659598		784	0.00279307		110	0.00799995		887	0.0184575
582	0.0028117		275	0.00173592		516	0.00291159		424	0.00659076		583	0.00277403		829	0.00798514		471	0.018435
428	0.00280884		468	0.00173503		302	0.00290559		1022	0.00658527		11	0.00275951		816	0.00794332		888	0.0184188
715	0.00275861		348	0.00172454		492	0.00289875		895	0.0065721		286	0.00275594		745	0.00790326		889	0.0183517
475	0.00275446		636	0.00171798		905	0.00289812		265	0.00652421		445	0.00274372		683	0.00788619		625	0.0182014
355	0.00267189		40	0.00171399		528	0.00289757		1018	0.00652392		702	0.00274111		686	0.00788354		472	0.0181339
903	0.0026606		54	0.00171179		554	0.00287619		332	0.00650889		643	0.00273244		826	0.00788144		890	0.0180441
674	0.00265187		443	0.00170312		436	0.00285903		153	0.0065015		491	0.00272686		5	0.00787805		891	0.018
484	0.00258421		127	0.00170235		164	0.002859		546	0.00648608		968	0.00270894		811	0.0078616		892	0.0179317
199	0.00258393		17	0.00169348		879	0.00285656		970	0.00647489		45	0.00270844		439	0.00783795		24	0.0178975
985	0.00257251		207	0.00168223		411	0.00284059		1085	0.00644973		63	0.00270391		505	0.0078302		473	0.0178849
516	0.00254991		173	0.00164184		504	0.00283994		600	0.00634288		646	0.00266699		671	0.00781878		626	0.0178786
164	0.00254709		269	0.00162658		38	0.00279415		232	0.00632138		591	0.0026652		111	0.00781174		474	0.017842
404	0.00252714		624	0.00161588		518	0.00278278		221	0.00628959		516	0.00266003		436	0.00780013		893	0.017841
581	0.00252662		159	0.00161554		968	0.0027796		278	0.00626103		231	0.00265872		675	0.0077951		219	0.0178024
214	0.00250031		569	0.00160312		247	0.00277731		698	0.00622323		782	0.00265599		681	0.00775105		894	0.0177651
426	0.0024524		304	0.00158802		209	0.0027767		654	0.0062108		442	0.0026496		328	0.00774713		25	0.0177625
116	0.00244296		84	0.00158708		368	0.00277445		649	0.00616869		428	0.00264925		96	0.00774395		26	0.0177225
388	0.00243831		136	0.00158142		352	0.00274971		326	0.00616173		824	0.00264084		116	0.00774004		895	0.0177
922	0.00243067		395	0.00157097		582	0.00273322		1193	0.00615758		2	0.00263577		141	0.00773886		896	0.017669
446	0.00242691		393	0.0015581		985	0.00270323		82	0.00613873		922	0.00261083		670	0.00773206		475	0.0176416
651	0.00241994		66	0.00155783		925	0.00269155		515	0.00609341		253	0.00260504		425	0.00772089		220	0.0176363
859	0.00241823		598	0.00154687		172	0.00268528		946	0.00608762		263	0.00258266		687	0.00769104		897	0.0175724
646	0.00240733		328	0.00153873		591	0.00263768		625	0.00608047		521	0.00255319		479	0.00768333		221	0.0175167
63	0.00234576		515	0.0015368		637	0.0026235		560	0.00606266		366	0.00254053		822	0.00764835		222	0.0175053
845	0.00234247		62	0.00152262		326	0.00261742		712	0.00605924		934	0.00253021		115	0.00763862		898	0.0173793
643	0.0023323		305	0.00151916		883	0.00260338		925	0.00604271		193	0.00246454		140	0.00762766		223	0.0173492
321	0.00232129		86	0.00148766		895	0.00260318		703	0.00602187		715	0.00246379		839	0.00760826		627	0.0173163
854	0.00231394		642	0.00145821		782	0.00260229		941	0.00600767		957	0.00246348		524	0.00749632		224	0.0172637
208	0.0023034		278	0.00145326		177	0.00259953		349	0.00599086		903	0.00245466		640	0.00746523		313	0.0171966
11	0.00227997		399	0.0014513		653	0.00259671		1240	0.00596698		651	0.00245365		684	0.00746302		899	0.0171415
314	0.00227765		288	0.00144682		763	0.0025912		90	0.00595886		905	0.00243663		685	0.00744659		900	0.0171089
934	0.00227734		292	0.00143539		56	0.0025787		948	0.00595742		419	0.00241963		836	0.00741398		225	0.0170885
561	0.00225594		218	0.00142108		182	0.0025531		721	0.00593913		53	0.00240721		641	0.00741188		27	0.0170313
638	0.00222158		124	0.00141483		580	0.00253263		825	0.00589825		851	0.00239878		106	0.00736116		628	0.0170047
550	0.00222095		97	0.0014037		483	0.00252598		166	0.00587337		648	0.00236274		91	0.00736037		629	0.0169589
293	0.00221697		335	0.0013982		72	0.00249683		375	0.00587089		400	0.00236224		674	0.00732552		630	0.0167444
349	0.00221025		258	0.0013883		903	0.00249178		1254	0.0058605		436	0.00236098		704	0.00725523		631	0.0167407
782	0.00219418		384	0.00138817		519	0.00248978		150	0.00583331		355	0.00233924		838	0.00721697		632	0.0167353
905	0.00219013		643	0.00138567		400	0.00246697		1017	0.00580866		314	0.00233507		834	0.00720485		28	0.0167279
519	0.00218515		359	0.00138028		2	0.00245747		640	0.00574217		582	0.00233242		749	0.00718287		633	0.0167196
193	0.00218144		164	0.00137799		873	0.00245136		98	0.0057057		225	0.00232426		317	0.00715789		476	0.0167017
784	0.00217503		128	0.00136582		446	0.00242481		289	0.00568626		708	0.0023077		664	0.00715121		634	0.0166755
785	0.00216603		276	0.00135591		761	0.00242116		1255	0.00568359		561	0.00230281		729	0.00709558		314	0.0166539
725	0.002156		158	0.00134718		484	0.00239344		953	0.00559455		877	0.00229625		667	0.0070722		226	0.0166267
697	0.00213667		600	0.00134661		111	0.00238446		314	0.00555592		106	0.00228956		148	0.00703112		29	0.0165226
257	0.00213447		488	0.00134455		232	0.00238393		447	0.00550549		550	0.00228615		120	0.00701708		635	0.0164546
112	0.0021343		5	0.00131339		475	0.00237779		910	0.00550479		518	0.00228484		746	0.00699081		477	0.0164063
385	0.00213038		44	0.00130937		11	0.00237101		165	0.00547107		691	0.00227849		748	0.00698185		478	0.0162577
398	0.00212758		671	0.00130276		642	0.00236733		799	0.00546172		671	0.00225367		651	0.006941		636	0.0162441
847	0.00212559		344	0.00128531		442	0.00236469		5	0.00545668		110	0.00224518		459	0.00691463		227	0.0161773
514	0.00212136		400	0.00127813		62	0.00235969		63	0.00541875		837	0.00222801		94	0.00690417		228	0.0161459
578	0.0021083		52	0.00127278		691	0.00235791		462	0.00541216		466	0.00222226		545	0.00690393		479	0.0160617
77	0.00209001		538	0.00126925		821	0.002355		354	0.00540473		812	0.00221597		820	0.00689922		229	0.0160533
223	0.00207803		430	0.00126071		764	0.00234859		673	0.00539798		859	0.00221217		741	0.0068734		230	0.0159789
648	0.00207026		526	0.00125009		719	0.00234422		894	0.00539642		817	0.00220036		830	0.00687088		231	0.0159232
630	0.00206963		336	0.00124354		703	0.00233545		1083	0.00537664		878	0.00219113		509	0.00683861		480	0.0158177
607	0.00206191		378	0.00123942		45	0.00231639		268	0.00531226		77	0.00217287		750	0.00682816		481	0.0157999
763	0.00204706		165	0.001234		671	0.00231588		45	0.00529777		223	0.00217286		723	0.00681811		232	0.015769
851	0.00203882		30	0.001225		60	0.00231564		484	0.00529483		868	0.00217086		463	0.00676919		30	0.0157465
910	0.00203614		187	0.00121027		447	0.0023057		401	0.00529052		462	0.00216786		825	0.00675393		482	0.0157379
1017	0.00202393		444	0.00120216		639	0.00229062		959	0.0052796		871	0.00216285		728	0.00674088		31	0.0157162
636	0.00202032		4	0.0011808		630	0.00228535		406	0.00527955		385	0.00215653		884	0.0067322		233	0.015681
881	0.0020152		179	0.00116457		929	0.00227801		1067	0.00521402		657	0.00214956		648	0.00667933		234	0.0156121
548	0.00201243		659	0.0011599		856	0.00225467		207	0.00521158		182	0.00213836		498	0.00665996		483	0.0156018
366	0.00201036		518	0.00115847		924	0.00225108		642	0.00513685		985	0.00213675		438	0.00664277		484	0.0155634
738	0.00200976		283	0.00115283		286	0.00224858		764	0.00512509		847	0.00212496		689	0.0066105		485	0.015462
219	0.00199486		142	0.00114881		549	0.00224757		1225	0.00511774		636	0.00212301		730	0.00659425		637	0.0152832
879	0.00197803		606	0.00114369		871	0.00224376		48	0.00511184		604	0.00211093		724	0.00656701		486	0.0152656
671	0.00196399		467	0.00114074		523	0.0022289		759	0.00507706		862	0.00210524		740	0.00647094		235	0.0152163
518	0.00196209		429	0.00114002		693	0.00222583		535	0.00505402		630	0.00209646		1	0.00646324		236	0.015199
871	0.00196087		130	0.0011227		957	0.00219422		1114	0.00505024		257	0.00207953		742	0.00644071		32	0.015165
641	0.00194973		523	0.00111265		204	0.00218741		171	0.0050302		725	0.00207459		49	0.00640723		638	0.015101
461	0.00194036		166	0.00110741		604	0.00218374		9	0.00502979		483	0.0020741		95	0.00638654		315	0.0150965
263	0.00192703		562	0.00108275		910	0.00216938		1110	0.00501262		879	0.00206052		565	0.0063199		237	0.0150603
867	0.00192682		465	0.00107937		789	0.00216826		1051	0.00501072		519	0.00205067		688	0.00631791		639	0.0150465
483	0.00191007		576	0.00107439		77	0.00214409		897	0.0049584		495	0.00204352		891	0.00630246		640	0.0149664
523	0.00190347		302	0.00107104		336	0.00214109		672	0.00493999		72	0.00204005		58	0.00629606		487	0.0149158
736	0.00189292		424	0.00106929		699	0.00211338		163	0.00491785		112	0.00200307		404	0.0062712		238	0.0148854
862	0.00188262		42	0.00106106		556	0.00210469		234	0.00488859		514	0.00200116		711	0.0061983		239	0.0148418
476	0.00188082		545	0.00103073		462	0.00209436		420	0.00488573		873	0.00199479		114	0.00618208		240	0.0148334
880	0.00187779		199	0.00100575		785	0.00208924		79	0.004866		845	0.00199209		732	0.00618113		641	0.01476
708	0.00183901		315	0.00100392		281	0.00206182		693	0.00485122		62	0.0019767		97	0.00615925		642	0.0147078
350	0.00182507		601	0.00100333		192	0.00205905		689	0.00484743		164	0.00196606		735	0.00613911		241	0.0146948
691	0.00181825		134	0.000975		547	0.00205896		216	0.00483031		492	0.00196028		828	0.00608015		242	0.0146574
549	0.00180329		621	0.000971		149	0.00204677		46	0.0047865		698	0.00195346		437	0.00607688		643	0.0146548
171	0.00179595		149	0.00097		9	0.00204176		545	0.00477895		60	0.00192733		16	0.00606282		488	0.0145175
436	0.00179319		416	0.00097		143	0.00203653		588	0.00475745		910	0.00190388		210	0.00603805		243	0.0145004
976	0.00179017		683	0.000964		779	0.00203519		757	0.00475193		344	0.00189892		824	0.00601288		244	0.0144987
868	0.00178536		592	0.00096		792	0.00203141		736	0.00472895		177	0.00188731		92	0.00593995		33	0.0144969
110	0.00178411		263	0.000958		670	0.00201802		950	0.00467272		9	0.00188075		817	0.0059194		489	0.0144744
883	0.00178323		227	0.000957		812	0.0019983		969	0.00461988		925	0.00186976		520	0.00588835		245	0.0144607
657	0.00176817		594	0.000943		976	0.0019934		1177	0.00459966		426	0.00186665		737	0.0058831		34	0.0144388
336	0.00176078		372	0.000928		521	0.00197488		924	0.00459028		763	0.00185937		733	0.00577822		246	0.0144051
325	0.00175331		318	0.000922		854	0.00196733		1099	0.0045783		134	0.00185848		449	0.00577169		644	0.0143715
60	0.00175119		648	0.000921		349	0.0019571		6	0.00455899		670	0.00185487		421	0.00575826		35	0.0142228
462	0.00174016		144	0.000919		460	0.0019559		633	0.00453531		523	0.0018379		715	0.00574316		247	0.0141896
701	0.00173121		289	0.000916		561	0.0019493		444	0.00451423		880	0.00181608		731	0.00569793		248	0.0141385
425	0.00170436		408	0.000915		970	0.00191539		302	0.00449934		307	0.00181343		41	0.00568704		490	0.0141008
466	0.00170145		597	0.000908		273	0.00191121		1189	0.00449713		1017	0.00180696		55	0.00567418		36	0.0140398
604	0.00169238		616	0.000908		439	0.0019111		896	0.00447919		279	0.00179571		201	0.00564079		316	0.0139673
878	0.00168508		178	0.000905		67	0.00182564		707	0.00447197		881	0.00177512		739	0.00562871		491	0.013959
439	0.00168207		188	0.000903		514	0.00180562		486	0.00443245		721	0.0017736		379	0.0056224		317	0.0139513
925	0.00168061		361	0.000897		263	0.00178992		450	0.0044239		217	0.00177286		119	0.00558382		249	0.0139352
231	0.0016764		481	0.000878		721	0.00178942		1236	0.00442277		701	0.00176598		517	0.00554719		492	0.0139335
670	0.00166495		497	0.000872		546	0.00177772		1004	0.00440064		581	0.00175773		918	0.00549824		645	0.0138896
844	0.00166171		432	0.00087		466	0.0017741		735	0.00438142		690	0.00175574		11	0.00546298		250	0.0138653
9	0.0016543		360	0.000867		778	0.00174843		798	0.00437521		653	0.00175251		46	0.00536546		318	0.0138325
745	0.00164402		581	0.000867		353	0.00174824		1253	0.00437264		697	0.00174653		468	0.00526881		251	0.0138151
253	0.00164241		440	0.000863		913	0.00173569		964	0.0043676		883	0.00174507		375	0.00525769		252	0.0138091
45	0.00163608		411	0.000854		219	0.00172417		1084	0.00434875		213	0.00173467		821	0.00523626		493	0.0137891
689	0.00163573		245	0.00085		293	0.0017104		843	0.00433419		439	0.00171922		371	0.00520134		37	0.0137823
821	0.00163172		433	0.000844		257	0.00169789		617	0.00432718		219	0.00171313		422	0.0051777		646	0.0137696
873	0.00163007		641	0.000832		301	0.00169646		212	0.00432542		789	0.00169743		472	0.00505565		38	0.0137376
44	0.00160109		49	0.000831		245	0.00169527		125	0.00429629		848	0.00169081		722	0.00502024		253	0.0137045
743	0.0016004		295	0.00083		802	0.00168931		116	0.00426494		785	0.00168342		744	0.00498896		254	0.0136963
653	0.00158378		290	0.000824		914	0.00167813		630	0.0042544		867	0.00168291		726	0.00489007		39	0.013644
172	0.00158181		115	0.000824		491	0.00166765		445	0.00424697		675	0.00167647		743	0.00484221		494	0.0136043
535	0.00157833		516	0.000818		777	0.00166311		697	0.00423176		761	0.00166701		736	0.00482571		255	0.0136037
87	0.00157505		259	0.000817		479	0.00163039		112	0.00423122		779	0.00166577		118	0.00481966		256	0.0135676
863	0.00154518		402	0.000813		987	0.00162067		899	0.00421777		473	0.00166551		697	0.00479594		257	0.013557
454	0.0015432		607	0.00081		612	0.00158867		761	0.00421119		447	0.00166346		904	0.00474157		40	0.0135426
640	0.00153877		449	0.000808		44	0.00158076		185	0.00419681		336	0.00164851		496	0.00471461		319	0.0134718
177	0.00153739		661	0.000782		438	0.00157323		988	0.00419596		693	0.00164446		725	0.0046541		258	0.0134628
726	0.00153345		286	0.000777		690	0.00156198		244	0.00418359		792	0.00163399		915	0.00461951		259	0.013448
693	0.0015252		626	0.000777		787	0.00155676		497	0.00416398		681	0.00162053		708	0.00458472		495	0.0133937
400	0.00152424		374	0.000774		801	0.00155373		28	0.00411776		171	0.00161935		909	0.00452536		496	0.0133859
279	0.00152079		609	0.000768		800	0.00155024		1062	0.00409412		549	0.00161082		206	0.00443989		41	0.0133222
1005	0.00151658		476	0.000767		647	0.0015486		295	0.0040902		852	0.00160344		895	0.00442229		497	0.0132059
642	0.00151136		590	0.000757		507	0.00154786		1188	0.00407188		172	0.00159961		400	0.00441267		42	0.0131869
556	0.00149967		191	0.000752		788	0.00154042		344	0.00405629		556	0.00159442		637	0.00440733		260	0.0131515
801	0.00149916		460	0.00075		877	0.001528		1239	0.00403343		535	0.001569		464	0.00434017		647	0.0131218
378	0.0014971		170	0.000745		851	0.00151124		820	0.00403017		29	0.00156773		56	0.00430105		648	0.0131058
492	0.00149028		653	0.000743		550	0.00151003		467	0.00402149		460	0.00156051		389	0.00429668		498	0.0130992
593	0.00147627		387	0.000742		1017	0.00149917		781	0.00399699		479	0.00154535		1017	0.0042735		649	0.0130727
147	0.0014762		502	0.000741		397	0.0014957		1075	0.00397528		449	0.00154458		701	0.00425724		261	0.0130458
4	0.00147308		657	0.000731		651	0.00148723		634	0.00396844		800	0.00154201		875	0.00419149		262	0.0130208
764	0.00146665		678	0.000729		675	0.00148703		440	0.00396337		801	0.00154093		521	0.00408688		650	0.013001
486	0.00146549		637	0.000712		999	0.00148219		626	0.00396136		689	0.00153343		390	0.00407485		320	0.0129982
541	0.00145454		456	0.000703		348	0.00148154		20	0.00392503		558	0.00152897		528	0.00406286		43	0.0129525
792	0.00145126		491	0.000702		930	0.00147413		1095	0.00391817		642	0.00152811		835	0.0039982		263	0.0129206
761	0.00144934		645	0.000699		648	0.00147052		532	0.00390441		147	0.00152307		145	0.00399564		651	0.0129157
597	0.00143737		350	0.000696		795	0.00146783		1036	0.00389333		976	0.00152108		28	0.00398876		652	0.0128684
551	0.0014264		647	0.000684		112	0.00146256		155	0.00383563		438	0.00151301		208	0.00397673		653	0.0128658
473	0.00142283		118	0.000675		437	0.00145366		937	0.00382551		461	0.00151293		33	0.00397225		264	0.0127729
28	0.00139482		213	0.000674		106	0.0014385		113	0.0037662		929	0.00150805		4	0.00397068		265	0.012753
29	0.00138548		266	0.000673		144	0.00141802		247	0.00375789		75	0.0015		644	0.00395022		654	0.0127484
778	0.00138222		631	0.00067		982	0.00140993		1217	0.00375754		736	0.00149181		435	0.00392188		266	0.012727
809	0.00138195		268	0.000667		790	0.0014077		408	0.00375162		641	0.00148996		199	0.00391846		499	0.012714
789	0.00136904		333	0.000655		537	0.00140461		954	0.00375019		924	0.00148863		193	0.00384021		655	0.0126992
698	0.00136895		377	0.000643		217	0.00140142		365	0.0037397		726	0.00148273		53	0.00382812		656	0.0126592
537	0.00136838		31	0.000643		54	0.00139463		507	0.00371049		446	0.00148101		29	0.00382384		500	0.0126535
913	0.00136344		542	0.000634		581	0.00137761		1162	0.00368848		913	0.00147245		397	0.00382024		501	0.0126361
456	0.00135931		370	0.00062		541	0.0013704		248	0.00367961		970	0.00147129		128	0.00380039		502	0.0126337
690	0.00135837		107	0.00062		502	0.00136503		29	0.00367947		87	0.00145391		716	0.00379259		44	0.0126125
134	0.00134366		454	0.000617		567	0.00136137		718	0.00367176		762	0.00144281		413	0.00379238		657	0.0126047
675	0.00134017		11	0.000614		709	0.00135601		333	0.00364115		639	0.00143409		26	0.00378965		267	0.0125983
639	0.00133958		192	0.000608		981	0.00133818		836	0.00363931		301	0.00142573		901	0.00377202		321	0.0125978
373	0.00133101		579	0.000579		809	0.00132737		425	0.00357798		640	0.00141877		747	0.00376494		503	0.0125619
929	0.00132942		356	0.000578		725	0.00132485		364	0.00357443		320	0.00141862		469	0.00375855		658	0.0125598
247	0.00132806		299	0.000576		597	0.00132204		313	0.00356483		914	0.00140602		491	0.00371473		45	0.0124946
924	0.00132304		451	0.000571		80	0.00131919		175	0.00356162		999	0.00139773		485	0.00369062		268	0.0124924
546	0.00131316		141	0.000555		363	0.00130515		562	0.00354825		174	0.00139749		700	0.00366897		46	0.0124923
914	0.00129622		404	0.000552		708	0.00129298		620	0.00353035		373	0.00138956		1005	0.00365214		659	0.0124332
855	0.00128873		63	0.000543		473	0.00128338		978	0.00352239		1005	0.00138574		453	0.00361925		269	0.0124057
795	0.00128596		373	0.000534		134	0.00128283		1167	0.00351388		743	0.00138488		934	0.00356535		504	0.0123948
703	0.00128431		419	0.000527		754	0.00128262		371	0.00351215		802	0.00138408		478	0.00344216		270	0.0123911
376	0.00128266		375	0.000523		223	0.00128072		912	0.00350564		844	0.00137957		553	0.00341093		271	0.0123535
7	0.00127415		527	0.00052		681	0.0012806		231	0.00349466		828	0.00137687		484	0.00338331		272	0.0122575
681	0.00127168		595	0.000517		174	0.00127462		373	0.00348757		315	0.00137107		705	0.00330633		660	0.0122377
762	0.00127011		446	0.000516		847	0.00127325		246	0.00340092		612	0.00136727		1019	0.00330052		505	0.0122117
1019	0.00126104		677	0.000514		689	0.00127102		235	0.00339811		888	0.00136518		655	0.00328598		322	0.012199
848	0.00125802		121	0.000512		93	0.00126955		639	0.00339567		397	0.00136391		712	0.00328395		661	0.0121887
612	0.00124282		450	0.000512		824	0.00126895		43	0.00338632		44	0.00136165		477	0.00325069		273	0.012179
812	0.00122962		138	0.000492		96	0.00126819		269	0.00338485		350	0.00136152		710	0.003236		47	0.0121616
397	0.00122364		135	0.000492		845	0.00126303		1086	0.003372		4	0.0013607		495	0.00322869		274	0.0121413
13	0.00121958		618	0.000487		535	0.0012523		631	0.0033559		486	0.00135437		139	0.00320555		323	0.0121359
12	0.00121878		396	0.00048		373	0.00125207		1092	0.00335012		541	0.00132892		440	0.00317182		275	0.0121207
999	0.00121082		71	0.000478		1005	0.00125083		415	0.00334267		703	0.00132711		18	0.00315107		276	0.012
722	0.00119994		495	0.000473		18	0.00124522		377	0.00333988		313	0.00132629		877	0.00312304		506	0.0119971
970	0.00119462		487	0.000472		558	0.0012419		32	0.00333433		67	0.00131501		515	0.00305493		277	0.0119444
779	0.00119238		414	0.000469		461	0.00123252		470	0.00332489		764	0.00131143		718	0.00303051		324	0.0118862
852	0.00119076		366	0.000467		422	0.00123236		273	0.00331987		861	0.00128906		460	0.00302456		662	0.0118527
817	0.00119058		303	0.000465		428	0.00122854		559	0.00331785		537	0.00128722		552	0.00301359		663	0.0118477
700	0.00118762		513	0.000459		499	0.00122745		161	0.00331409		795	0.00128417		514	0.00300788		664	0.0118068
802	0.00118556		248	0.000454		817	0.00122424		852	0.0033097		778	0.00128273		903	0.00295063		325	0.011801
200	0.00117936		470	0.000442		75	0.00122019		281	0.00330604		597	0.00128215		1015	0.00292606		665	0.0117789
860	0.00117922		612	0.000441		889	0.00121815		274	0.0032447		546	0.00127725		1007	0.00286738		278	0.0117677
460	0.001179		535	0.000441		157	0.00121316		478	0.00324389		1015	0.00126893		1003	0.00282773		326	0.011765
34	0.00117186		32	0.000434		752	0.00120086		240	0.00323347		860	0.00126378		6	0.00282379		279	0.0117537
438	0.00116663		80	0.000432		367	0.00119611		1158	0.00322358		863	0.00126221		15	0.00281939		280	0.011745
721	0.00115821		314	0.000431		593	0.00119464		304	0.00320031		700	0.00125867		432	0.00277618		281	0.0116925
75	0.00114988		552	0.000427		676	0.00118602		208	0.00319802		247	0.00125603		922	0.0027389		666	0.0116351
987	0.00114936		285	0.000427		213	0.00118587		1029	0.00319372		593	0.00124434		503	0.00263614		48	0.0116172
558	0.00114333		90	0.000423		4	0.00118079		336	0.0031446		281	0.00124228		720	0.00263188		49	0.0116023
833	0.00113568		629	0.000417		61	0.00115163		951	0.00314069		116	0.00124193		488	0.00261081		327	0.0116022
1007	0.00112325		273	0.000416		13	0.0011416		54	0.00310914		676	0.00124015		17	0.00258307		507	0.0115549
430	0.00112274		78	0.00041		859	0.00112656		663	0.00310857		699	0.00124		535	0.00258181		282	0.0115379
699	0.00111575		91	0.000406		500	0.0011228		187	0.00310362		293	0.00122476		882	0.00257359		283	0.011518
68	0.00111453		381	0.000404		622	0.00111922		103	0.00309376		28	0.00121841		905	0.00256876		508	0.0114751
501	0.00108761		38	0.000396		921	0.00110404		687	0.00309298		855	0.00121638		433	0.00253931		284	0.0114341
281	0.00108368		386	0.000386		557	0.00110233		775	0.0030879		788	0.00119763		423	0.00251438		50	0.0114304
1015	0.00107712		309	0.000379		454	0.00109685		85	0.00308211		833	0.00119547		466	0.00250851		51	0.0114193
888	0.00106163		103	0.000377		116	0.00109561		303	0.0030712		13	0.00118709		554	0.00249322		52	0.011402
479	0.00106076		619	0.000375		15	0.00109131		1088	0.00306597		398	0.00118311		401	0.00247287		53	0.0113724
226	0.0010574		422	0.000371		53	0.00108355		898	0.00305687		981	0.00117849		462	0.00244864		54	0.0113714
824	0.00105029		317	0.000366		29	0.00107732		906	0.00305449		787	0.0011699		50	0.00244806		55	0.0113608
1003	0.00104649		676	0.000365		881	0.00106758		661	0.00305025		437	0.00116228		444	0.00244453		285	0.0113595
122	0.00103836		483	0.000364		880	0.00106596		955	0.00300605		61	0.00115893		547	0.00239318		286	0.0113504
232	0.0010352		625	0.000361		990	0.00106098		172	0.00299434		1019	0.00114625		44	0.00238112		667	0.0113485
800	0.00102984		472	0.00036		319	0.00105038		384	0.00299238		982	0.00112171		910	0.0023742		287	0.0113435
930	0.00102814		293	0.000359		122	0.00104897		464	0.00298422		777	0.00111855		380	0.00231541		328	0.0113268
64	0.00101276		35	0.000358		974	0.00104857		4	0.00295669		200	0.00110728		429	0.00230774		288	0.0113203
992	0.00100869		627	0.000354		398	0.00103876		1130	0.00294551		135	0.00110627		200	0.00228723		289	0.0113178
902	0.00100785		310	0.000348		288	0.00103779		645	0.00294466		378	0.0010999		349	0.00225663		56	0.0113123
861	0.0010053		189	0.000347		848	0.00103246		77	0.00294336		987	0.00106779		441	0.0022492		57	0.0112972
676	0.00100058		73	0.000347		384	0.00103223		1087	0.00293943		551	0.00105659		717	0.00224571		58	0.0112795
383	0.000967		492	0.000345		757	0.00102682		635	0.00293315		165	0.00104355		881	0.00222084		290	0.0112491
777	0.000967		652	0.00034		805	0.00101815		624	0.00291329		167	0.00104062		473	0.0022026		291	0.0112315
837	0.000966		634	0.000336		649	0.00101499		1218	0.00290481		100	0.00103969		366	0.00210877		59	0.0111975
921	0.000953		117	0.000336		992	0.00101136		777	0.00289616		754	0.00103928		486	0.00209163		292	0.0111911
571	0.000952		58	0.000335		907	0.00101001		3	0.00287437		363	0.00103679		24	0.002079		293	0.0111112
363	0.000947		116	0.000328		852	0.00100571		1064	0.00285472		752	0.00103324		880	0.00202855		294	0.011095
788	0.000945		490	0.000327		920	0.00100365		147	0.00285124		719	0.00103076		352	0.00199213		295	0.0110019
344	0.000943		152	0.000324		694	0.00100115		182	0.00280629		456	0.00102425		925	0.00197424		60	0.0109892
982	0.000942		623	0.000316		868	0.00100098		495	0.00279307		383	0.00102256		30	0.00196441		296	0.0109839
531	0.00094		556	0.000312		995	0.001		413	0.00279063		1003	0.00102223		434	0.00194104		668	0.0109742
169	0.000939		486	0.00031		377	0.000999		938	0.00278788		722	0.00100021		996	0.00194029		329	0.0109574
767	0.000934		230	0.000308		453	0.000997		770	0.00278155		18	0.000996		416	0.00191802		509	0.0109471
259	0.00093		421	0.000306		862	0.000994		306	0.00277029		453	0.000986		348	0.00191737		669	0.0109315
538	0.000924		521	0.000304		659	0.000991		708	0.0027683		930	0.000984		714	0.001879		330	0.0109264
744	0.000921		541	0.000299		506	0.000991		623	0.00276422		238	0.000982		353	0.00185448		61	0.0109167
799	0.000916		501	0.000296		887	0.00099		101	0.00275538		622	0.000979		368	0.00182401		510	0.0109144
174	0.000913		161	0.000293		70	0.00099		381	0.00275517		767	0.000969		431	0.00181583		297	0.0108877
437	0.000912		547	0.000288		1019	0.000987		1020	0.00274865		790	0.000964		378	0.00180051		62	0.0108825
889	0.000902		190	0.000284		17	0.000984		537	0.00274726		602	0.000961		417	0.00179758		63	0.0108723
224	0.000899		401	0.000277		899	0.000977		348	0.0027399		538	0.000961		351	0.00177067		298	0.0108662
67	0.00089		614	0.000268		426	0.000974		541	0.00273299		995	0.000928		531	0.00176886		670	0.0108574
18	0.00089		555	0.00026		543	0.000972		222	0.00272992		809	0.000928		1001	0.00176309		511	0.0108376
602	0.000889		257	0.000258		226	0.00097		463	0.00270993		122	0.000924		350	0.0017355		671	0.0108136
966	0.000885		198	0.000256		477	0.000969		856	0.00270807		1007	0.000918		964	0.00172835		64	0.0107781
754	0.000874		620	0.000247		283	0.000965		1176	0.00270779		799	0.000917		538	0.00170714		65	0.0107722
312	0.000873		638	0.000238		730	0.000963		828	0.00270099		266	0.000913		204	0.00170591		331	0.0107586
974	0.000873		79	0.000237		743	0.000958		1213	0.00269727		684	0.00091		418	0.0017059		299	0.0107451
165	0.000869		484	0.000236		344	0.000953		24	0.00267909		15	0.000905		1000	0.00169067		300	0.0107175
182	0.000869		177	0.000235		1015	0.000936		710	0.0026568		169	0.000901		913	0.00167686		66	0.0107121
953	0.000861		133	0.000232		602	0.000928		382	0.00264732		567	0.000898		969	0.00167218		67	0.0106995
567	0.000857		215	0.000231		791	0.000925		135	0.00264427		454	0.000897		355	0.00166669		672	0.0106841
100	0.000851		33	0.000231		888	0.000913		844	0.00263996		531	0.000896		347	0.00166107		512	0.010663
787	0.00085		176	0.000227		715	0.000907		1230	0.00262693		34	0.000892		929	0.0016575		513	0.010632
167	0.000847		376	0.000226		768	0.000906		870	0.00261132		267	0.000884		548	0.00164687		68	0.0106313
756	0.000846		617	0.000224		569	0.000903		471	0.00260183		850	0.00088		980	0.00162924		514	0.010605
413	0.000846		380	0.000222		610	0.0009		848	0.00257849		273	0.000879		924	0.00161774		332	0.0105572
285	0.000834		296	0.00022		52	0.000898		662	0.00257622		992	0.000864		344	0.00160266		673	0.0105467
135	0.000827		561	0.00022		988	0.000895		570	0.0025683		203	0.00086		10	0.00159006		674	0.0105053
262	0.000824		549	0.000218		28	0.000895		78	0.00256759		712	0.000859		376	0.0015883		69	0.0105032
320	0.000822		639	0.000217		36	0.000892		965	0.00255749		501	0.000857		914	0.0015863		675	0.0105023
307	0.000821		320	0.000217		893	0.000888		519	0.00255712		716	0.000855		269	0.00158128		70	0.0104846
981	0.00082		530	0.000213		684	0.000885		37	0.00255467		647	0.000854		692	0.00155154		515	0.0104496
557	0.00082		507	0.000212		246	0.000885		671	0.00253571		7	0.00085		23	0.00154719		333	0.0104446
647	0.000805		119	0.000212		495	0.000881		668	0.00253098		896	0.000849		876	0.0015462		676	0.0104303
589	0.000803		615	0.00021		7	0.00088		487	0.00251877		477	0.000847		194	0.00154442		334	0.010392
421	0.000797		108	0.000209		450	0.000876		709	0.00251642		920	0.000842		22	0.00153605		516	0.0103911
716	0.000786		391	0.000208		98	0.000875		987	0.00251617		568	0.000825		264	0.00152923		517	0.0103847
238	0.000775		175	0.000205		697	0.000875		1091	0.00250091		347	0.000823		450	0.00152831		677	0.010371
605	0.000768		182	0.000202		573	0.00087		618	0.00248765		367	0.000822		42	0.00151533		518	0.0103514
449	0.000767		520	0.000201		726	0.00087		1150	0.00248364		889	0.000817		526	0.00150512		678	0.0103176
995	0.000766		577	0.0002		205	0.000867		824	0.00246696		377	0.000813		549	0.00149572		71	0.0102745
598	0.000752		200	0.000191		87	0.000862		774	0.00244733		705	0.000811		713	0.00149541		72	0.0102537
245	0.000751		560	0.00019		608	0.000862		121	0.00243624		318	0.000807		207	0.0014903		519	0.0101815
563	0.000751		459	0.000189		707	0.000862		1154	0.00242121		232	0.000806		354	0.00147861		335	0.0101118
997	0.000745		316	0.000177		701	0.000857		833	0.00240038		557	0.000804		359	0.00147828		520	0.010071
920	0.000742		20	0.000174		799	0.000857		128	0.00239731		504	0.000804		603	0.00147759		679	0.010059
42	0.000742		25	0.000172		234	0.000851		1201	0.00239403		756	0.000799		265	0.0014738		73	0.0100151
504	0.000738		448	0.000171		456	0.000842		1068	0.00238665		376	0.000798		550	0.00147044		521	0.00998633
751	0.000731		640	0.00017		736	0.000834		862	0.00238655		921	0.000797		561	0.00144751		522	0.00998051
896	0.000726		225	0.000166		749	0.000833		362	0.00237473		749	0.000784		475	0.00144571		336	0.00995056
6	0.000724		7	0.000163		760	0.000825		813	0.0023744		288	0.000777		21	0.00141028		680	0.00994075
273	0.000718		385	0.000157		818	0.000824		666	0.00236816		157	0.000777		190	0.00140959		681	0.00991139
709	0.000718		209	0.000157		794	0.000808		1155	0.0023651		573	0.000768		888	0.00140441		74	0.00990329
212	0.000716		557	0.000156		1003	0.000806		1063	0.0023532		543	0.000767		357	0.00140228		337	0.00989782
757	0.000716		347	0.000151		486	0.000801		1251	0.00235149		17	0.000759		613	0.00139475		523	0.00988358
568	0.000714		101	0.00015		194	0.000798		17	0.00234939		430	0.000754		258	0.00138412		682	0.00987375
302	0.000714		452	0.00015		110	0.000796		434	0.00233928		589	0.000752		342	0.00137151		338	0.00983673
813	0.000714		346	0.000143		563	0.000796		1214	0.0023226		902	0.000746		408	0.00136845		75	0.00976035
622	0.000712		184	0.000136		69	0.000795		1000	0.00231932		709	0.000745		902	0.00136835		524	0.00973832
806	0.00071		479	0.000136		844	0.000792		611	0.00229712		919	0.000741		270	0.00136012		525	0.00973257
152	0.000709		628	0.000131		531	0.000789		822	0.00229103		608	0.000738		388	0.00135463		526	0.00969916
203	0.000701		172	0.000131		723	0.000784		827	0.00227253		245	0.000738		930	0.00134484		339	0.0096991
308	0.000698		129	0.00013		762	0.000783		258	0.00226688		68	0.000737		977	0.00132969		76	0.00965264
712	0.000691		447	0.000128		1011	0.000781		619	0.00226536		262	0.000729		706	0.00132447		683	0.00963557
705	0.00069		418	0.000126		919	0.000781		42	0.00226346		974	0.000718		38	0.00130497		684	0.00960706
645	0.000689		596	0.000125		908	0.00078		16	0.00226185		953	0.000715		427	0.00129073		340	0.00954131
357	0.000689		540	0.00012		242	0.000779		851	0.00225511		669	0.000715		455	0.00128364		527	0.00953549
138	0.000689		533	0.00012		421	0.000765		1024	0.00224062		825	0.00071		383	0.0012832		341	0.0095319
487	0.000684		14	0.000118		923	0.000745		312	0.00223072		422	0.000709		205	0.00128186		528	0.00951704
533	0.000682		56	0.000117		37	0.000741		391	0.00222827		907	0.000705		356	0.00128183		529	0.00950866
964	0.00068		435	0.000112		147	0.000737		1243	0.00222273		285	0.000704		602	0.001272		77	0.00948501
617	0.000679		469	0.000111		966	0.000736		423	0.00221947		563	0.000701		556	0.00127132		342	0.0094617
942	0.000672		499	0.00011		774	0.00073		1208	0.00221662		64	0.000696		20	0.00126779		78	0.00942358
941	0.000668		461	0.000108		571	0.000726		429	0.00221491		421	0.000695		611	0.00125574		343	0.00941924
61	0.000657		471	0.000104		807	0.000724		1166	0.00220392		966	0.000691		609	0.00124192		79	0.0093993
752	0.000657		214	0.000103		435	0.000718		638	0.00218459		204	0.000689		606	0.00124126		530	0.00937073
315	0.000655		563	0.000102		362	0.000717		1065	0.00217879		744	0.000687		360	0.00123664		531	0.00936669
990	0.000654		608	0.000102		722	0.000715		913	0.00217329		990	0.000686		972	0.00123511		685	0.00936496
794	0.000649		474	9.26e-05		828	0.000707		1050	0.00216375		12	0.000671		921	0.00123505		686	0.00933262
422	0.000647		558	9.26e-05		538	0.000705		501	0.00214906		163	0.000671		345	0.00121576		532	0.00931171
684	0.000645		473	9.15e-05		589	0.000701		1147	0.0021392		645	0.000663		3	0.00120892		687	0.00926503
15	0.000642		566	9.14e-05		266	0.000701		374	0.00212514		658	0.00066		343	0.001204		688	0.00923007
626	0.000642		494	8.8e-05		902	0.000692		126	0.00212303		598	0.000655		621	0.00120039		533	0.00920227
710	0.000638		274	8.68e-05		641	0.000691		1221	0.00210915		571	0.000655		465	0.00119517		80	0.00919907
572	0.000617		477	8.65e-05		12	0.000684		367	0.00207948		980	0.000654		983	0.0011913		534	0.00919267
649	0.000613		241	8.59e-05		207	0.000681		684	0.00206488		969	0.000653		261	0.0011793		344	0.00919193
919	0.000611		489	8.33e-05		487	0.000679		1113	0.00205832		791	0.000653		620	0.00117242		689	0.00918355
574	0.000606		426	8.2e-05		1012	0.000677		705	0.00205219		610	0.000647		610	0.00116472		345	0.00917304
719	0.000603		29	7.95e-05		625	0.000669		677	0.00204123		964	0.000646		1018	0.00115837		690	0.00912197
831	0.0006		587	7.76e-05		135	0.000666		1031	0.00204092		478	0.000644		346	0.00115694		346	0.00912175
287	0.000598		464	7.69e-05		522	0.000665		266	0.002032		80	0.000643		623	0.00114807		535	0.00910865
162	0.000598		524	7.34e-05		867	0.000665		1012	0.00203134		672	0.000638		47	0.00114595		691	0.0091039
980	0.000595		313	6.78e-05		285	0.000658		986	0.00200992		805	0.000638		363	0.00113885		347	0.00904119
17	0.000591		580	6.73e-05		672	0.000654		797	0.00200023		818	0.000637		618	0.00112947		81	0.00903734
866	0.00059		462	6.7e-05		751	0.000651		608	0.00198327		816	0.000632		619	0.00112266		82	0.00902209
522	0.000584		261	6.66e-05		935	0.00065		294	0.00197875		283	0.000629		251	0.00112107		536	0.00900074
790	0.000579		260	6.65e-05		1007	0.000644		832	0.00197112		942	0.000623		605	0.0011192		348	0.00899715
70	0.000575		548	6.62e-05		964	0.000636		65	0.0019672		649	0.000614		896	0.00111853		83	0.00899118
266	0.00057		570	6.61e-05		224	0.000633		324	0.00196146		794	0.00061		608	0.00111686		349	0.00898373
608	0.000568		655	6.43e-05		953	0.00063		214	0.00195881		685	0.00061		385	0.00109918		350	0.00898275
908	0.000568		455	6.03e-05		231	0.000627		525	0.00195627		6	0.000608		541	0.00109458		84	0.0089774
183	0.000559		388	5.97e-05		267	0.000624		729	0.00195613		757	0.000608		604	0.00108926		537	0.00897049
807	0.000557		506	5.97e-05		640	0.000616		882	0.00194516		751	0.000606		615	0.00108027		538	0.008948
907	0.000557		405	5.85e-05		806	0.000611		325	0.00192618		357	0.000603		268	0.00107927		692	0.00892145
969	0.000556		397	5.83e-05		660	0.000606		1025	0.00191655		1011	0.000593		870	0.00107807		539	0.00891824
887	0.000555		605	5.78e-05		1016	0.000605		690	0.00191562		887	0.000592		867	0.0010709		85	0.0089086
936	0.000554		482	5.77e-05		533	0.000602		1256	0.00188003		308	0.000592		614	0.00106904		351	0.00890683
797	0.000552		412	5.73e-05		685	0.000601		416	0.00187703		908	0.000585		546	0.00105487		540	0.0088858
348	0.000548		61	5.64e-05		376	0.000584		477	0.0018684		93	0.000582		868	0.00105418		86	0.00888064
805	0.000548		415	5.63e-05		347	0.000584		838	0.00185047		230	0.000581		617	0.00104505		87	0.00885392
988	0.000546		46	5.5e-05		897	0.000582		688	0.00184775		282	0.000578		340	0.00104197		352	0.00878993
230	0.000541		559	5.15e-05		855	0.000574		1111	0.00184604		892	0.000576		259	0.00103998		541	0.00875678
945	0.000536		364	5.14e-05		307	0.000569		267	0.00184032		996	0.000574		986	0.0010392		542	0.00874162
327	0.000534		265	5.04e-05		997	0.000566		647	0.00183089		54	0.000566		197	0.00103391		543	0.0087302
850	0.000529		72	5e-05		886	0.000566		196	0.00181203		70	0.000566		474	0.00103329		353	0.00872869
107	0.000528		325	4.82e-05		615	0.000563		571	0.00180462		395	0.000566		292	0.00102634		88	0.00870497
283	0.000527		368	4.63e-05		624	0.000563		1118	0.00179592		770	0.000555		780	0.00102196		693	0.00868836
543	0.000526		478	4.42e-05		551	0.000561		1157	0.00179382		220	0.000552		622	0.00101363		694	0.00853942
770	0.000523		197	4.33e-05		121	0.000559		1055	0.00178031		997	0.00055		483	0.00101093		544	0.00850844
323	0.00052		300	4.32e-05		6	0.000558		829	0.00177146		834	0.000538		260	0.00100454		695	0.00845492
267	0.000518		93	4.24e-05		168	0.000556		580	0.00176298		730	0.000538		333	0.00100424		545	0.00842958
377	0.000516		633	3.97e-05		614	0.000552		62	0.00175902		768	0.000532		263	0.00100223		696	0.00842482
1011	0.000511		139	3.96e-05		559	0.00055		966	0.0017512		323	0.000532		266	0.00100186		89	0.0084167
749	0.000509		603	3.93e-05		967	0.000548		1138	0.00173241		533	0.000525		612	0.000998		546	0.00839479
478	0.000507		584	3.69e-05		912	0.000548		776	0.0017301		401	0.000525		627	0.000998		547	0.00838269
828	0.000483		591	3.68e-05		220	0.000546		521	0.00172945		268	0.000521		963	0.000997		548	0.00837377
1016	0.00048		363	3.22e-05		669	0.000545		1179	0.00172127		1016	0.000517		920	0.000996		354	0.00836707
615	0.000479		428	3.2e-05		633	0.000536		706	0.00171791		144	0.000517		984	0.000986		697	0.00836024
39	0.000479		658	2.83e-05		758	0.000536		756	0.00171784		529	0.000509		288	0.000984		698	0.00835683
954	0.000474		240	2.82e-05		34	0.000535		616	0.00171771		427	0.000504		358	0.000983		699	0.00835403
996	0.000472		409	2.77e-05		73	0.000533		1197	0.00170835		24	0.000502		935	0.000967		90	0.00832588
493	0.000472		157	2.74e-05		529	0.000527		1116	0.00170016		967	0.000502		624	0.000959		549	0.0083123
529	0.000471		169	2.68e-05		969	0.000523		1008	0.00169787		615	0.0005		761	0.000959		700	0.00830554
573	0.000471		75	2.53e-05		478	0.000518		186	0.00169762		988	0.000498		879	0.000958		550	0.00830215
614	0.000465		512	2.4e-05		837	0.000518		130	0.00169234		694	0.000496		629	0.000956		701	0.00829757
669	0.000464		578	2.34e-05		129	0.000517		493	0.00168539		362	0.000488		772	0.000953		91	0.00826826
477	0.000464		76	2.25e-05		860	0.000514		80	0.00166561		731	0.000487		625	0.000946		355	0.00826705
912	0.000455		403	2.2e-05		996	0.000514		239	0.00165809		36	0.000485		341	0.000946		92	0.00824753
768	0.000452		543	2.03e-05		383	0.000511		1210	0.00164995		569	0.000482		871	0.000945		93	0.00822656
791	0.00045		611	2.01e-05		834	0.00051		398	0.00164634		387	0.000481		267	0.000942		94	0.008215
211	0.00045		111	1.76e-05		24	0.00051		479	0.0016447		614	0.000477		764	0.000942		356	0.00819968
600	0.000445		362	1.57e-05		142	0.000506		589	0.0016409		625	0.000476		751	0.000938		551	0.00815828
658	0.000444		654	1.48e-05		133	0.000504		766	0.0016402		566	0.000473		866	0.000938		357	0.00813003
898	0.000443		431	1.36e-05		109	0.000502		878	0.00163722		408	0.000473		516	0.000935		95	0.00810495
893	0.000441		60	1.26e-05		700	0.000499		985	0.00163634		723	0.000471		949	0.000932		702	0.00808939
204	0.000437		234	1.22e-05		756	0.000492		665	0.00163284		194	0.00047		763	0.000929		96	0.00808911
938	0.000433		622	1.05e-05		221	0.00049		417	0.00162921		893	0.000466		752	0.000919		552	0.00808231
228	0.000433		334	1.01e-05		598	0.000486		1220	0.00162608		352	0.000464		694	0.000919		703	0.00808136
803	0.000433		673	9.21e-06		816	0.000484		387	0.00161861		121	0.000463		262	0.000913		358	0.00807913
774	0.000432		216	8.65e-06		714	0.000483		1028	0.00161514		1012	0.000459		250	0.000908		359	0.00806126
395	0.000421		151	8.43e-06		100	0.00048		595	0.00160181		96	0.000456		979	0.000906		360	0.00804447
892	0.000421		656	8.36e-06		706	0.000475		779	0.00159929		935	0.000456		626	0.000903		97	0.00803195
367	0.000419		204	6.26e-06		183	0.000472		730	0.00159347		259	0.000455		607	0.000902		553	0.0080273
268	0.000417		143	5.46e-06		268	0.00047		765	0.00158972		384	0.000452		492	0.000902		361	0.00801504
99	0.000416		19	5.44e-06		850	0.000466		139	0.00158117		311	0.000447		779	0.000901		98	0.00801351
163	0.000409		675	4.24e-06		605	0.000459		1194	0.00156924		559	0.000441		973	0.000894		362	0.00800416
96	0.000407		511	3.69e-06		786	0.000456		11	0.00154917		710	0.000439		777	0.000893		363	0.00799821
1001	0.000406		43	3.43e-06		980	0.000455		1023	0.00154448		936	0.000437		856	0.000893		99	0.00799771
685	0.000405		311	2.74e-06		724	0.000452		119	0.00153228		806	0.000434		778	0.000888		100	0.00799018
144	0.000403		531	2.73e-06		942	0.000443		552	0.00153124		242	0.000431		932	0.000881		704	0.00798599
629	0.000402		291	2.41e-06		378	0.000442		363	0.00153006		923	0.000431		865	0.00088		101	0.00797112
634	0.000402		480	2.4e-06		401	0.000442		192	0.00152912		189	0.00043		551	0.00088		554	0.00795809
846	0.000399		668	2.27e-06		626	0.000441		199	0.00152903		898	0.000428		769	0.000879		555	0.00793864
672	0.000397		519	2.09e-06		744	0.000435		1258	0.00152338		624	0.000425		754	0.000878		102	0.00793725
677	0.000397		599	2.08e-06		629	0.000431		56	0.00151999		522	0.00042		536	0.000876		556	0.00793531
194	0.000394		383	1.17e-06		894	0.000429		977	0.00151961		69	0.00042		757	0.000875		364	0.00792455
401	0.000393		682	1.03e-06		766	0.000428		742	0.00151892		760	0.000417		1014	0.000872		705	0.00788513
288	0.000389		417	1.01e-06		167	0.000424		914	0.00150952		619	0.000417		869	0.000872		557	0.00788298
1012	0.000389		89	9.89e-07		861	0.000422		540	0.00150572		807	0.000416		707	0.000872		365	0.00785831
1000	0.000384		236	5.4e-07		863	0.000421		1173	0.00150427		183	0.000409		768	0.000871		103	0.00785083
347	0.000383		68	3.51e-07		276	0.000417		162	0.00150005		718	0.000406		253	0.000868		558	0.00783335
387	0.000383		220	2.4e-07		804	0.000416		346	0.00149839		853	0.000403		862	0.000867		104	0.00781864
427	0.000379		94	2.4e-07		101	0.000405		108	0.0014977		954	0.000401		957	0.00086		366	0.0078019
823	0.000374		45	1.29e-07		839	0.000403		508	0.00149583		774	0.0004		907	0.000859		559	0.00778374
991	0.000373		355	5.97e-08		611	0.000402		393	0.00149196		912	0.000399		863	0.000859		105	0.00775984
80	0.000372		112	1.6e-08		171	0.000399		902	0.00148655		634	0.000395		338	0.000853		106	0.00775416
619	0.000367					66	0.000395		230	0.00147832		574	0.000393		336	0.00085		706	0.00773389
625	0.000367					324	0.000392		146	0.0014723		37	0.000392		864	0.00085		560	0.00772416
512	0.000366					540	0.000392		308	0.00145823		659	0.000391		908	0.000848		367	0.00771444
890	0.000362					20	0.000392		670	0.00145464		899	0.000388		808	0.000844		707	0.007704
24	0.000358					322	0.000391		399	0.00144231		846	0.000388		766	0.00084		107	0.00768506
718	0.000358					259	0.000387		935	0.00143197		596	0.000386		601	0.000837		108	0.00768257
830	0.000356					189	0.000382		849	0.00142889		776	0.000386		760	0.000835		368	0.0076542
673	0.000353					600	0.000379		100	0.00142719		487	0.000385		753	0.000834		561	0.00765283
69	0.000353					609	0.000379		936	0.00142148		820	0.000383		532	0.000834		708	0.00764577
364	0.000348					803	0.000379		1125	0.00141972		493	0.000382		254	0.000831		562	0.00760387
668	0.000345					449	0.000378		1101	0.00141792		287	0.000372		919	0.000831		369	0.00759245
540	0.000342					184	0.000373		534	0.00141249		605	0.00037		27	0.000831		709	0.00755766
624	0.000341					238	0.000373		422	0.0014115		977	0.00037		758	0.00083		109	0.00755552
923	0.000336					767	0.000368		35	0.00141142		620	0.000367		339	0.000827		110	0.00755418
952	0.000335					825	0.000363		650	0.00140936		221	0.000362		289	0.000826		563	0.0075537
610	0.000335					568	0.000361		816	0.00139994		626	0.000361		765	0.000824		564	0.00751454
121	0.000332					587	0.000356		780	0.00138261		413	0.00036		773	0.000819		710	0.00749028
73	0.00033					165	0.000355		430	0.00136659		707	0.00036		849	0.000816		111	0.007486
633	0.000329					57	0.000351		548	0.00136045		823	0.000356		37	0.000816		112	0.00747249
731	0.000324					152	0.000349		555	0.00135732		459	0.000348		759	0.000816		565	0.00746515
37	0.000321					320	0.000349		877	0.00134923		739	0.000347		771	0.000815		566	0.00743421
559	0.000316					262	0.000348		945	0.00134831		673	0.000347		36	0.000809		567	0.00740089
682	0.000311					823	0.000347		861	0.00133818		941	0.000345		1008	0.000807		113	0.0073964
967	0.000311					596	0.000344		683	0.00133781		280	0.000342		241	0.000807		568	0.00739036
330	0.000311					64	0.000343		692	0.00133591		536	0.00034		252	0.000803		569	0.0073774
499	0.00031					619	0.000342		1192	0.00133378		435	0.000339		883	0.000802		114	0.0073585
758	0.000307					668	0.000341		352	0.00132663		945	0.000336		770	0.0008		711	0.00733422
220	0.000306					617	0.000339		968	0.00132377		983	0.000334		861	0.000795		712	0.00733086
786	0.000305					228	0.000337		1003	0.001317		617	0.000333		898	0.00079		115	0.00731101
739	0.000304					316	0.000336		731	0.00131392		10	0.000331		854	0.000788		116	0.00729904
352	0.000301					395	0.000336		597	0.00131158		137	0.000331		567	0.000785		117	0.00727744
544	0.000297					949	0.000335		658	0.00130537		39	0.00033		334	0.000784		570	0.00727538
838	0.000293					459	0.000335		76	0.00129808		292	0.000328		767	0.000773		370	0.00726306
659	0.000292					512	0.00033		958	0.00129786		811	0.000323		859	0.00077		571	0.00725885
825	0.000283					620	0.000329		143	0.00129236		30	0.000322		630	0.00077		572	0.00725758
36	0.000283					797	0.000323		903	0.00129186		73	0.00032		847	0.000765		371	0.00725697
459	0.000282					574	0.000319		768	0.0012798		633	0.00032		284	0.000764		713	0.00720853
798	0.000282					32	0.000315		189	0.00126437		938	0.000317		557	0.00076		573	0.00719027
89	0.000276					838	0.000313		410	0.00126071		587	0.000316		331	0.000758		118	0.0071836
536	0.000269					713	0.000313		556	0.00124133		481	0.000309		796	0.000755		714	0.00717786
362	0.000269					954	0.000306		102	0.00123333		629	0.000294		878	0.000751		372	0.00717306
707	0.000268					945	0.000305		976	0.00121843		107	0.000293		774	0.000749		574	0.00716796
43	0.000267					190	0.000304		646	0.00121739		327	0.000292		755	0.000748		119	0.00716197
482	0.000266					1004	0.000295		315	0.00120558		839	0.000281		965	0.000745		373	0.00711319
157	0.000265					369	0.000291		686	0.00120151		600	0.00028		860	0.000744		575	0.00710448
977	0.000259					991	0.000287		636	0.00119821		138	0.000279		855	0.000743		576	0.0070939
983	0.000257					169	0.000285		1128	0.00119094		1000	0.000279		851	0.000739		120	0.00708789
292	0.000257					430	0.000284		685	0.00118268		1001	0.000279		845	0.000737		374	0.00706452
951	0.000256					741	0.000281		796	0.00117732		991	0.000279		519	0.000732		715	0.00705663
662	0.000255					243	0.000279		318	0.00117704		611	0.000274		187	0.000732		716	0.00705311
469	0.000254					896	0.000276		174	0.00116986		890	0.000274		892	0.000731		375	0.00704471
566	0.000253					84	0.000275		593	0.0011621		133	0.000272		1013	0.000731		376	0.00701826
282	0.000253					833	0.000275		923	0.00115672		540	0.00027		776	0.00073		577	0.00701656
54	0.000251					936	0.000274		607	0.00115659		797	0.000269		248	0.000729		717	0.00700707
189	0.000248					705	0.000273		330	0.00115426		677	0.000269		971	0.000727		377	0.00700551
453	0.000248					163	0.000271		483	0.00114748		609	0.000264		912	0.000724		718	0.00700358
587	0.000247					481	0.000271		237	0.0011474		162	0.00026		563	0.000723		578	0.00699638
511	0.00024					282	0.00027		747	0.00114656		319	0.000259		493	0.000709		579	0.00699049
694	0.000234					68	0.000267		921	0.00113421		838	0.000258		810	0.000706		378	0.0069785
820	0.000233					78	0.000266		746	0.00113007		374	0.000258		848	0.000706		379	0.006939
30	0.00023					108	0.000264		1054	0.00112464		927	0.000256		337	0.000703		121	0.00693613
168	0.00023					798	0.000264		669	0.00112134		348	0.000253		852	0.000701		580	0.00693522
596	0.000228					618	0.000263		55	0.00110549		98	0.000252		181	0.0007		380	0.0069305
760	0.000227					197	0.000263		57	0.00110134		469	0.000251		558	0.0007		581	0.00692981
569	0.000227					748	0.000262		418	0.00108973		129	0.000251		775	0.000696		582	0.00692687
730	0.000227					673	0.000262		615	0.00108865		758	0.000249		762	0.000694		381	0.00691712
532	0.000224					374	0.000262		473	0.00107857		512	0.000248		975	0.000694		122	0.00691595
606	0.000224					811	0.00026		1126	0.00107361		618	0.000247		841	0.000693		123	0.00690979
886	0.000223					650	0.00025		310	0.00107339		226	0.000247		255	0.000692		719	0.00690642
618	0.000219					1010	0.00025		1168	0.00106152		246	0.000245		257	0.000691		583	0.00689991
190	0.000217					594	0.000249		1231	0.00104448		866	0.000245		293	0.000686		124	0.00688535
853	0.000216					728	0.000247		177	0.00104068		741	0.000243		243	0.000686		720	0.00683714
374	0.000213					820	0.000244		1069	0.00103443		786	0.000242		616	0.000686		721	0.00682956
948	0.000211					260	0.00024		795	0.00102806		886	0.000241		807	0.000686		125	0.00680852
911	0.00021					536	0.00024		1244	0.00102805		949	0.00024		809	0.000685		722	0.00678723
382	0.00021					278	0.000234		1094	0.0010248		382	0.000239		539	0.000684		723	0.00677394
353	0.000206					327	0.000231		794	0.0010246		803	0.000236		247	0.000683		724	0.00676622
899	0.000206					911	0.00023		1212	0.0010232		180	0.000234		873	0.00068		382	0.00676203
632	0.000205					941	0.000226		1021	0.0010077		562	0.000233		853	0.00068		584	0.00674943
464	0.000204					292	0.000226		191	0.000979		962	0.000231		756	0.000677		725	0.00674702
594	0.000204					917	0.000225		839	0.000972		885	0.000225		256	0.000674		585	0.00674096
776	0.000199					729	0.000225		142	0.000971		594	0.000225		857	0.00067		726	0.00673844
917	0.000199					510	0.000225		753	0.000967		1004	0.000223		332	0.000667		383	0.00673843
927	0.000194					1000	0.000224		961	0.000967		52	0.000222		890	0.000666		727	0.00672991
489	0.000189					606	0.000222		734	0.000964		99	0.000219		719	0.000663		586	0.00672622
733	0.000188					773	0.00022		728	0.000962		260	0.000219		850	0.000661		728	0.00672405
133	0.000188					566	0.00022		455	0.00096		74	0.000218		501	0.000659		729	0.00671867
384	0.000187					158	0.000214		490	0.000959		507	0.000217		846	0.000654		384	0.00669758
972	0.000186					872	0.000211		351	0.00095		316	0.000215		805	0.000653		126	0.00668721
539	0.000185					892	0.000209		433	0.000949		804	0.00021		806	0.000653		385	0.00667336
869	0.000185					173	0.000205		389	0.000942		89	0.000209		291	0.000652		587	0.00664232
935	0.000184					938	0.000205		347	0.00094		798	0.000208		785	0.000648		127	0.00661537
804	0.000184					570	0.000205		860	0.000938		78	0.000208		858	0.000644		128	0.00660052
319	0.000183					836	0.000204		805	0.000904		668	0.000204		8	0.000644		129	0.00658804
98	0.000179					977	0.000203		1007	0.000899		32	0.000199		844	0.000639		386	0.00654578
301	0.000179					10	0.000203		1047	0.000899		682	0.000197		457	0.000637		588	0.006545
129	0.000178					932	0.000202		204	0.00089		532	0.000192		242	0.00063		130	0.00653487
57	0.000178					1001	0.000199		1175	0.000887		656	0.000192		244	0.000624		131	0.00652872
947	0.000178					42	0.000199		606	0.000881		20	0.000188		48	0.000619		132	0.006527
40	0.000177					739	0.000197		1140	0.000879		506	0.000186		792	0.000617		589	0.00652234
720	0.000176					572	0.000192		871	0.000877		831	0.000186		789	0.000616		590	0.00649969
1004	0.000174					928	0.000192		962	0.000877		57	0.000185		387	0.000616		730	0.00647975
66	0.000173					712	0.000192		674	0.000874		364	0.000184		795	0.000616		133	0.00646907
74	0.000171					429	0.000191		994	0.000874		917	0.000184		794	0.000614		387	0.00646692
207	0.000169					138	0.000188		786	0.000867		748	0.000179		787	0.000614		134	0.00645536
748	0.000168					717	0.000186		251	0.000867		813	0.000178		842	0.000611		388	0.00644614
943	0.000166					746	0.000182		38	0.000862		212	0.000177		373	0.000609		731	0.00643367
620	0.000163					632	0.00018		767	0.00086		827	0.000177		196	0.000608		591	0.00640466
316	0.000161					440	0.00018		1115	0.000859		312	0.000177		788	0.0006		389	0.00638994
507	0.00016					998	0.000179		1257	0.000859		342	0.000174		287	0.0006		732	0.00638874
260	0.000158					408	0.000178		716	0.000859		724	0.000173		804	0.000597		733	0.00636241
746	0.000157					731	0.000175		926	0.000856		151	0.000172		978	0.000596		734	0.00636015
656	0.000156					962	0.000175		644	0.000845		43	0.000171		518	0.000594		390	0.00635294
611	0.000156					468	0.000174		198	0.000844		660	0.00017		801	0.000589		135	0.00634188
137	0.000153					132	0.000173		392	0.00084		170	0.000169		802	0.000585		735	0.00632954
609	0.000153					759	0.000173		621	0.000839		184	0.000168		367	0.00058		736	0.00632202
256	0.000152					432	0.000171		973	0.000834		450	0.000166		784	0.000579		136	0.0063108
93	0.00015					645	0.00017		876	0.000834		168	0.000164		790	0.000574		137	0.00630761
885	0.000149					511	0.000168		1180	0.000827		840	0.000164		781	0.000572		737	0.00630571
32	0.000147					631	0.000167		714	0.000822		224	0.000162		184	0.000569		738	0.00628564
306	0.000146					677	0.000165		1134	0.000807		972	0.000162		791	0.000565		592	0.00628051
170	0.000146					386	0.000164		345	0.000795		961	0.000159		962	0.00056		593	0.00627104
683	0.000145					770	0.000164		553	0.000783		733	0.000157		797	0.000557		391	0.00627025
661	0.000144					387	0.000163		850	0.000782		572	0.000154		923	0.000549		739	0.00626234
530	0.000142					151	0.000162		427	0.000779		101	0.000153		786	0.000549		138	0.00626053
590	0.000141					634	0.000161		1164	0.000769		22	0.000152		803	0.000548		594	0.00624835
82	0.00014					783	0.000161		526	0.000766		998	0.000151		950	0.000546		740	0.00622739
153	0.000139					813	0.000158		835	0.000761		911	0.000149		800	0.000543		392	0.00622647
932	0.000137					978	0.000158		667	0.000757		986	0.000146		282	0.000542		139	0.00622046
313	0.000135					993	0.000157		956	0.000752		499	0.000145		523	0.000533		140	0.00621706
132	0.000135					599	0.000156		1043	0.00075		897	0.000143		799	0.000533		141	0.00621009
864	0.000134					682	0.000155		307	0.000738		539	0.000143		285	0.000533		741	0.00617868
916	0.000134					198	0.000154		136	0.000738		530	0.000142		32	0.000532		142	0.00617006
741	0.000133					562	0.00015		576	0.000737		783	0.00014		209	0.000525		595	0.00616072
48	0.000132					30	0.000149		819	0.000735		952	0.000139		628	0.000524		742	0.00614929
435	0.000132					822	0.000148		435	0.000721		1018	0.000138		335	0.000523		596	0.00614474
949	0.000131					124	0.000147		804	0.000719		66	0.000138		60	0.000522		393	0.0061347
450	0.00013					289	0.000146		489	0.000716		158	0.000136		798	0.00052		143	0.00612258
723	0.000128					530	0.000146		1042	0.000713		603	0.000134		793	0.000518		597	0.00609344
463	0.000128					532	0.000145		93	0.000696		652	0.000134		246	0.000507		144	0.00607546
198	0.000128					427	0.000144		426	0.000695		872	0.000132		290	0.000506		394	0.00605162
322	0.000128					853	0.00014		210	0.000695		187	0.000131		937	0.000504		598	0.00604561
986	0.000127					196	0.000139		1242	0.000688		683	0.000128		297	0.000503		395	0.00604535
1018	0.000127					603	0.000138		301	0.000687		152	0.000128		245	0.000496		145	0.00603924
180	0.000126					658	0.000137		458	0.000687		542	0.000127		782	0.000495		599	0.00600734
735	0.000126					490	0.000137		1145	0.000684		511	0.000125		452	0.000492		146	0.00600644
872	0.000125					413	0.000133		866	0.000679		932	0.000125		961	0.000489		743	0.00598177
783	0.000124					287	0.000133		699	0.000671		590	0.000125		280	0.000483		396	0.00597082
961	0.000123					472	0.000133		1032	0.000666		544	0.000123		989	0.000476		600	0.00596986
481	0.000121					22	0.000131		517	0.000655		606	0.000123		958	0.000475		397	0.00596316
205	0.000121					137	0.000131		1169	0.000639		592	0.000123		283	0.000473		398	0.00594655
246	0.000121					252	0.000131		518	0.000629		631	0.00012		843	0.000468		744	0.00594182
21	0.00012					827	0.000129		1019	0.000616		766	0.000119		480	0.000465		745	0.00593598
10	0.000118					961	0.000126		787	0.000613		993	0.000119		430	0.000465		147	0.0059288
818	0.000115					482	0.000122		1260	0.00061		463	0.000119		489	0.000464		399	0.00592068
184	0.000113					433	0.000122		920	0.00061		943	0.000116		504	0.00046		746	0.00591771
729	0.000113					202	0.000122		1071	0.000609		948	0.000116		1009	0.000459		148	0.00591263
242	0.00011					323	0.000121		558	0.000607		202	0.000115		939	0.000457		747	0.00590611
502	0.00011					926	0.000119		919	0.000605		190	0.000113		568	0.000454		149	0.00590598
836	0.000108					463	0.000119		241	0.000605		489	0.000113		286	0.000452		748	0.00585643
613	0.000108					1006	0.000117		49	0.000603		951	0.000111		296	0.000451		749	0.00585047
940	0.000108					153	0.000117		39	0.000602		947	0.000107		295	0.000449		750	0.00581339
680	0.000107					592	0.000117		875	0.0006		680	0.000107		2	0.000448		150	0.00576945
993	0.000103					187	0.000116		414	0.0006		894	0.000104		14	0.000444		400	0.00574866
324	0.000101					1018	0.000116		784	0.00059		775	9.89e-05		709	0.00044		401	0.00562281
101	0.0001					317	0.000115		120	0.000584		978	9.85e-05		1002	0.000433		402	0.00561105
280	9.87e-05					39	0.000112		409	0.000582		42	9.78e-05		382	0.000427		403	0.0055956
103	9.66e-05					975	0.000112		1246	0.00058		599	9.44e-05		273	0.000418		404	0.00550525
865	9.61e-05					983	0.000112		1250	0.000578		198	9.43e-05		278	0.000416		405	0.00549322
627	9.33e-05					874	0.000111		1057	0.000572		1020	9.21e-05		543	0.000415		406	0.00548579
603	9.17e-05					162	0.000111		1183	0.000572		613	9.18e-05		783	0.000411		407	0.00541899
22	9.16e-05					74	0.00011		845	0.000572		464	9.17e-05		911	0.000408		408	0.00516871
623	9.02e-05					710	0.000109		1066	0.000572		632	9e-05		362	0.000404		409	0.00513705
631	8.88e-05					916	0.000108		233	0.000566		836	8.89e-05		885	0.000403		410	0.00500688
717	8.78e-05					716	0.000108		400	0.000563		369	8.85e-05		45	0.000401		411	0.00500101
750	8.77e-05					989	0.000107		1129	0.000559		82	8.8e-05		271	0.000394		412	0.00499198
506	8.5e-05					846	0.000107		1171	0.000559		822	8.69e-05		202	0.000392		413	0.00495051
737	8.44e-05					771	0.000107		272	0.000555		706	8.6e-05		946	0.000386		414	0.00494842
840	8.14e-05					418	0.000106		1237	0.000552		1010	8.28e-05		481	0.000384		415	0.00492541
52	8.13e-05					971	0.000105		814	0.000551		916	8.18e-05		189	0.000383		416	0.00485853
660	8.06e-05					776	0.000104		863	0.00055		746	7.92e-05		956	0.000382		417	0.00483249
955	8.05e-05					513	0.000103		1102	0.000549		720	7.83e-05		281	0.000381		418	0.00479647
500	7.81e-05					590	9.92e-05		979	0.000549		661	7.66e-05		917	0.000376		419	0.00475522
592	7.79e-05					753	9.91e-05		360	0.000547		750	7.57e-05		294	0.000366		420	0.00471033
897	7.79e-05					312	9.79e-05		869	0.000547		1006	7.51e-05		249	0.000365		421	0.00466822
158	7.78e-05					890	9.49e-05		432	0.000544		113	7.34e-05		192	0.000359		422	0.00466364
678	7.56e-05					750	9.44e-05		933	0.000541		197	7.3e-05		559	0.000359		423	0.00465267
431	7.23e-05					1020	9.35e-05		436	0.000538		940	7.16e-05		889	0.000351		424	0.00463765
998	7.02e-05					952	9.18e-05		111	0.000536		502	7.07e-05		537	0.000351		425	0.00461445
124	6.99e-05					8	9.06e-05		984	0.000536		207	7e-05		967	0.00035		426	0.00460995
963	6.97e-05					105	8.99e-05		290	0.000535		963	6.79e-05		933	0.000338		427	0.00455625
1006	6.85e-05					765	8.95e-05		737	0.000528		1014	6.74e-05		525	0.00033		428	0.00450978
14	6.85e-05					627	8.92e-05		513	0.000527		737	6.55e-05		276	0.000325		429	0.00449579
962	6.75e-05					732	8.78e-05		713	0.000525		513	6.4e-05		959	0.000317		430	0.00448654
755	6.55e-05					130	8.7e-05		193	0.00052		14	6.23e-05		279	0.000317		431	0.00447068
759	6.42e-05					321	8.56e-05		1247	0.000514		755	6.19e-05		994	0.000315		432	0.00446347
417	6.28e-05					832	8.52e-05		1117	0.000512		297	6e-05		470	0.000313		433	0.00428793
984	6.13e-05					14	8.51e-05		107	0.00051		830	5.77e-05		703	0.000308		434	0.00425457
202	5.97e-05					683	8.19e-05		934	0.000506		979	5.68e-05		699	0.000302		435	0.00422491
652	5.95e-05					857	8.18e-05		738	0.000505		40	5.58e-05		960	0.000299		436	0.00422245
440	5.9e-05					951	8.12e-05		872	0.000505		555	5.54e-05		916	0.000285		437	0.00422026
1020	5.81e-05					720	8.08e-05		726	0.000496		931	5.5e-05		198	0.000279		438	0.00418413
151	5.77e-05					542	7.82e-05		249	0.000494		126	5.46e-05		944	0.000279		439	0.00409789
361	5.61e-05					963	7.74e-05		1120	0.000493		650	5.4e-05		698	0.000277		440	0.00405935
418	5.51e-05					692	7.66e-05		293	0.000492		678	5.33e-05		1010	0.000267		441	0.00401933
706	5.43e-05					654	7.61e-05		810	0.000488		728	5.17e-05		419	0.000261		442	0.0040061
621	5.25e-05					43	7.57e-05		144	0.000485		955	5.16e-05		300	0.000259		443	0.00399749
765	5.25e-05					241	7.57e-05		1053	0.000485		84	5.12e-05		487	0.000257		444	0.00399423
1014	5.22e-05					931	7.31e-05		679	0.000484		322	4.97e-05		998	0.000256		445	0.00396051
562	5.17e-05					48	7.19e-05		499	0.000482		1008	4.85e-05		931	0.000251		446	0.00395709
728	5.12e-05					898	7.09e-05		297	0.00048		666	4.81e-05		299	0.000246		447	0.00395559
843	5.07e-05					769	7.02e-05		1132	0.000475		864	4.75e-05		569	0.000243		448	0.00395421
570	5e-05					869	6.46e-05		782	0.000474		103	4.71e-05		1020	0.000233		449	0.00393391
221	4.97e-05					950	6.45e-05		1010	0.000474		153	4.62e-05		34	0.000233		450	0.00392963
555	4.91e-05					203	6.34e-05		651	0.000472		829	4.58e-05		900	0.000227
276	4.88e-05					417	6.31e-05		89	0.000466		440	4.51e-05		1006	0.000225
989	4.87e-05					943	6.26e-05		1149	0.000465		740	4.48e-05		471	0.000211
311	4.78e-05					948	6.21e-05		419	0.000465		735	4.3e-05		183	0.000199
196	4.56e-05					21	5.75e-05		758	0.000464		241	4.3e-05		277	0.000196
527	4.56e-05					858	5.74e-05		847	0.000464		243	4.28e-05		398	0.000194
857	4.37e-05					661	5.6e-05		502	0.000457		973	4.22e-05		544	0.000178
900	4.33e-05					831	5.53e-05		599	0.000457		109	4.15e-05		693	0.000177
243	4.23e-05					829	5.44e-05		1165	0.000453		984	4.1e-05		993	0.000176
1008	4.21e-05					972	5.27e-05		456	0.000452		729	4.07e-05		274	0.000169
1010	4.11e-05					623	5.25e-05		1039	0.000451		714	3.99e-05		966	0.000164
370	4.06e-05					947	5.07e-05		1185	0.000449		510	3.98e-05		185	0.000162
513	4.04e-05					423	5.07e-05		659	0.000446		679	3.97e-05		361	0.000162
679	3.98e-05					539	4.9e-05		931	0.000435		21	3.82e-05		377	0.000159
766	3.9e-05					117	4.9e-05		184	0.000434		472	3.78e-05		955	0.000158
342	3.84e-05					865	4.58e-05		584	0.000432		570	3.66e-05		988	0.000155
829	3.67e-05					937	4.55e-05		438	0.000429		432	3.66e-05		499	0.000153
126	3.59e-05					89	4.4e-05		40	0.000426		950	3.57e-05		275	0.000152
978	3.5e-05					31	4.39e-05		539	0.000425		753	3.43e-05		534	0.000148
441	3.48e-05					830	4.34e-05		942	0.000424		621	3.35e-05		887	0.000144
8	3.36e-05					280	4.28e-05		1245	0.000422		900	3.33e-05		59	0.000139
408	3.28e-05					59	4.04e-05		715	0.000422		773	3.01e-05		31	0.000139
20	3.17e-05					885	4.02e-05		817	0.000413		759	2.96e-05		395	0.000139
975	3.01e-05					431	3.77e-05		1073	0.00041		236	2.96e-05		974	0.000138
979	2.94e-05					1002	3.74e-05		981	0.000406		627	2.91e-05		298	0.000138
894	2.91e-05					1009	3.74e-05		494	0.000401		865	2.89e-05		1004	0.000137
197	2.91e-05					939	3.67e-05		930	0.000397		205	2.75e-05		940	0.000136
775	2.82e-05					900	3.67e-05		137	0.000396		105	2.71e-05		566	0.000132
510	2.8e-05					793	3.52e-05		605	0.000393		196	2.61e-05		490	0.000128
289	2.59e-05					212	3.44e-05		50	0.000389		31	2.61e-05		990	0.000118
181	2.51e-05					180	3.32e-05		1228	0.000386		8	2.45e-05		386	0.000118
931	2.34e-05					255	3.19e-05		431	0.000385		692	2.43e-05		510	0.000116
472	2.22e-05					742	3.15e-05		772	0.000383		713	2.4e-05		272	0.000113
994	2.18e-05					544	3.13e-05		904	0.000379		142	2.39e-05		928	0.00011
542	2.16e-05					955	3.11e-05		749	0.000379		623	2.38e-05		981	0.000107
599	2.14e-05					940	2.99e-05		939	0.000378		124	2.29e-05		369	0.000105
724	2.12e-05					308	2.94e-05		989	0.000373		1013	2.25e-05		874	0.000104
928	2.06e-05					621	2.91e-05		1122	0.000371		843	2.23e-05		893	0.000101
241	2.03e-05					613	2.82e-05		802	0.000363		353	2e-05		364	9.54e-05
822	1.99e-05					733	2.77e-05		1124	0.000361		928	1.91e-05		513	9.52e-05
429	1.93e-05					382	2.75e-05		1061	0.000356		500	1.91e-05		527	9.26e-05
236	1.85e-05					364	2.71e-05		543	0.000355		965	1.83e-05		943	9.23e-05
944	1.82e-05					680	2.62e-05		298	0.000351		361	1.8e-05		970	8.79e-05
832	1.79e-05					678	2.53e-05		754	0.00035		939	1.79e-05		947	8.19e-05
692	1.78e-05					103	2.35e-05		823	0.000349		717	1.7e-05		982	8.1e-05
654	1.73e-05					864	2.3e-05		859	0.000346		585	1.7e-05		570	8.08e-05
753	1.69e-05					979	2.21e-05		335	0.000345		869	1.64e-05		426	7.92e-05
444	1.65e-05					314	2.15e-05		841	0.000341		468	1.62e-05		446	7.69e-05
386	1.65e-05					965	2.1e-05		441	0.000341		662	1.62e-05		926	7.61e-05
1013	1.62e-05					527	2.07e-05		1109	0.000341		874	1.59e-05		992	7.49e-05
105	1.59e-05					493	2.03e-05		359	0.000338		665	1.57e-05		533	7.16e-05
117	1.54e-05					994	2.03e-05		1229	0.000332		482	1.55e-05		186	7.05e-05
490	1.5e-05					946	1.96e-05		880	0.000331		108	1.55e-05		691	6.74e-05
564	1.42e-05					927	1.9e-05		997	0.00033		937	1.54e-05		999	6.74e-05
109	1.42e-05					464	1.82e-05		881	0.00033		228	1.46e-05		182	6.27e-05
950	1.37e-05					126	1.79e-05		750	0.000326		994	1.29e-05		948	5.6e-05
650	1.3e-05					230	1.63e-05		656	0.000324		173	1.26e-05		695	4.84e-05
102	1.24e-05					102	1.51e-05		1070	0.000323		958	1.17e-05		203	4.77e-05
686	1.16e-05					663	1.48e-05		578	0.000321		765	1.01e-05		52	4.44e-05
369	1.06e-05					840	1.41e-05		741	0.000318		971	1.01e-05		9	4.37e-05
585	1.05e-05					361	1.4e-05		474	0.000316		975	9.88e-06		951	4.24e-05
423	1.05e-05					986	1.37e-05		176	0.000314		771	9.67e-06		507	4.16e-05
839	1.03e-05					306	1.3e-05		542	0.000313		252	8.69e-06		987	4.09e-05
130	9.85e-06					256	1.29e-05		236	0.000312		946	8.16e-06		927	3.6e-05
713	9.76e-06					1014	1.27e-05		745	0.000311		826	7.92e-06		906	3.55e-05
534	9.45e-06					525	1.26e-05		812	0.000308		211	7.64e-06		482	3.53e-05
814	9.28e-06					564	1.21e-05		202	0.000304		441	7.22e-06		522	3.46e-05
432	9.14e-06					370	1.1e-05		676	0.000303		289	6.47e-06		952	2.97e-05
108	8.65e-06					933	9.85e-06		411	0.000301		906	6.4e-06		530	2.58e-05
1002	8.62e-06					534	9.28e-06		1034	0.0003		330	6.24e-06		374	2.35e-05
187	8.48e-06					236	9.13e-06		1187	0.0003		418	6.16e-06		953	2.27e-05
933	7.54e-06					342	8.67e-06		998	0.0003		117	6.07e-06		894	2.15e-05
78	7.35e-06					444	8.64e-06		911	0.000298		989	6.01e-06		39	2.15e-05
973	6.53e-06					958	8.61e-06		1100	0.000295		276	5.91e-06		458	1.97e-05
926	6.47e-06					330	8.41e-06		83	0.000292		278	5.65e-06		502	1.92e-05
666	5.81e-06					740	8.21e-06		739	0.00028		527	5.55e-06		555	1.77e-05
937	5.56e-06					99	8.21e-06		917	0.000278		433	5.37e-06		445	1.76e-05
793	5.29e-06					686	7.63e-06		598	0.000276		429	4.99e-06		976	1.71e-05
525	4.79e-06					489	6.92e-06		250	0.000275		857	4.78e-06		886	1.68e-05
958	4.68e-06					652	6.1e-06		1046	0.000274		960	4.6e-06		1012	1.55e-05
771	4.66e-06					960	5.83e-06		544	0.000272		663	4.37e-06		7	1.36e-05
714	4.58e-06					906	5.7e-06		158	0.00027		132	4.22e-06		529	1.33e-05
960	4.39e-06					718	5.65e-06		905	0.00027		742	4.05e-06		899	1.29e-05
826	4.29e-06					170	5.34e-06		31	0.000268		431	3.89e-06		384	1.27e-05
959	4.24e-06					755	5.16e-06		811	0.000267		370	3.67e-06		447	1.26e-05
874	4.23e-06					679	5.12e-06		353	0.000257		525	3.49e-06		702	1.2e-05
297	4.1e-06					469	4.53e-06		854	0.000249		858	3.36e-06		562	1.18e-05
811	3.98e-06					666	4.02e-06		842	0.000248		814	3.35e-06		991	1.08e-05
84	3.86e-06					82	3.63e-06		967	0.000248		732	3.28e-06		506	1.08e-05
433	3.78e-06					656	3.03e-06		803	0.000244		832	2.81e-06		40	1.08e-05
113	3.64e-06					944	2.92e-06		975	0.000243		1002	2.79e-06		540	9.3e-06
773	3.62e-06					560	2.91e-06		915	0.00024		417	2.71e-06		428	9.17e-06
278	3.42e-06					662	2.25e-06		14	0.00024		444	2.54e-06		542	8.91e-06
252	3.38e-06					211	2.2e-06		217	0.00024		256	2.16e-06		500	8.65e-06
173	3.26e-06					297	2.09e-06		733	0.000239		306	1.77e-06		1016	7.66e-06
906	3.11e-06					1008	1.97e-06		1259	0.000234		654	1.58e-06		512	6.67e-06
234	3.08e-06					107	1.85e-06		922	0.000232		687	1.31e-06		57	5.9e-06
740	3e-06					181	1.43e-06		164	0.000232		130	1.07e-06		511	5.42e-06
59	2.79e-06					311	1.33e-06		1049	0.000232		423	1.03e-06		942	5.17e-06
769	2.63e-06					826	1.27e-06		858	0.000231		926	9.65e-07		872	4.71e-06
858	2.59e-06					687	1.06e-06		1082	0.000227		490	8.26e-07		560	4.57e-06
31	2.39e-06					585	7.66e-07		1104	0.000227		102	4.74e-07		997	4.57e-06
742	2.39e-06					866	6.95e-07		582	0.000226		1009	4.48e-07		995	4.54e-06
732	2.18e-06					956	5.61e-07		563	0.000225		48	4.14e-07		938	4.36e-06
939	1.87e-06					1013	5.46e-07		744	0.000222		255	3.96e-07		985	4.02e-06
142	1.64e-06					814	4.39e-07		928	0.000219		324	3.61e-07		941	3.85e-06
971	1.61e-06					555	3.87e-07		170	0.000219		769	3.58e-07		696	3.51e-06
834	1.6e-06					843	3.26e-07		404	0.000217		933	3.06e-07		370	3.42e-06
560	1.57e-06					737	3.2e-07		1041	0.000212		564	2.23e-07		968	2.98e-06
663	1.35e-06					775	3.02e-07		791	0.000211		181	1.75e-07		897	2.56e-06
965	1.34e-06					665	2.4e-07		723	0.00021		686	1.59e-07		954	2.47e-06
816	1.11e-06					315	1.86e-07		884	0.000208		59	1.22e-07		43	1.44e-06
255	6.61e-07					984	1.09e-07		439	0.000208		234	1.05e-07		945	8.36e-07
1009	4.67e-07					313	6.86e-08		695	0.000206		534	4.82e-08		13	8.34e-07
946	1.31e-07					40	6.85e-08		148	0.000204		386	3.22e-08		54	7.97e-07
827	1.28e-07					959	4.83e-08		834	0.000202		956	2.23e-08		564	3.02e-07
687	7.08e-08					113	1.76e-08		1234	0.0002		560	2.13e-08		1011	2e-07
665	5.03e-08					973	1.11e-08		940	0.000194		793	1.92e-08		442	1.22e-07
468	3.09e-08					441	6.49e-09		1006	0.000192		959	1.65e-08		936	2.76e-08
956	3.63e-09					735	1.16e-09		1252	0.000189		944	1.9e-10		12	1.23e-08
									949	0.000188
									1133	0.000184
									793	0.000184
									1186	0.000182
									929	0.000179
									1107	0.000178
									932	0.000177
									1136	0.000177
									254	0.000177
									809	0.000172
									748	0.000172
									129	0.000171
									1235	0.00017
									1058	0.000167
									680	0.000164
									226	0.000164
									622	0.000162
									1203	0.000161
									227	0.000159
									790	0.000158
									1014	0.000156
									503	0.000155
									36	0.000154
									328	0.000154
									159	0.000153
									309	0.00015
									2	0.00015
									530	0.000149
									788	0.000149
									504	0.000148
									682	0.000146
									1223	0.000142
									252	0.000142
									1093	0.00014
									287	0.00014
									1248	0.000139
									807	0.000139
									1108	0.000138
									215	0.000133
									704	0.000131
									908	0.000131
									506	0.00013
									160	0.00013
									1030	0.000128
									773	0.000127
									999	0.000126
									873	0.000126
									1195	0.000124
									203	0.000123
									299	0.000123
									461	0.00012
									769	0.00012
									361	0.000117
									604	0.000117
									864	0.000111
									482	0.000111
									1048	0.000109
									41	0.000109
									678	0.000108
									567	0.000104
									944	0.000103
									211	0.000102
									601	0.000101
									916	9.85e-05
									370	9.83e-05
									1105	9.78e-05
									69	9.68e-05
									157	9.63e-05
									319	9.4e-05
									1178	8.64e-05
									762	8.59e-05
									927	8.51e-05
									569	8.47e-05
									581	8.33e-05
									992	8.31e-05
									995	8.24e-05
									587	8.18e-05
									1052	8.06e-05
									288	7.97e-05
									1077	7.78e-05
									437	7.7e-05
									830	7.64e-05
									1119	7.22e-05
									1060	7.19e-05
									1121	7.09e-05
									947	6.77e-05
									1056	6.73e-05
									800	6.55e-05
									551	6.51e-05
									789	6.35e-05
									228	6.33e-05
									641	6.31e-05
									109	6.19e-05
									412	6.12e-05
									179	5.97e-05
									1227	5.91e-05
									263	5.61e-05
									743	5.55e-05
									485	5.49e-05
									960	5.48e-05
									991	5.47e-05
									154	5.3e-05
									982	5.16e-05
									993	5.16e-05
									220	5.06e-05
									156	5.01e-05
									476	4.99e-05
									296	4.78e-05
									1182	4.74e-05
									785	4.73e-05
									1219	4.66e-05
									224	4.64e-05
									980	4.63e-05
									628	4.5e-05
									300	4.43e-05
									867	4.2e-05
									44	3.93e-05
									1151	3.93e-05
									918	3.86e-05
									1196	3.73e-05
									627	3.61e-05
									943	3.54e-05
									1174	3.51e-05
									1044	3.51e-05
									724	3.46e-05
									378	3.3e-05
									1045	3.29e-05
									1131	3.25e-05
									1103	3.23e-05
									110	3.16e-05
									888	3.13e-05
									1127	3.07e-05
									778	2.94e-05
									990	2.93e-05
									1038	2.86e-05
									229	2.82e-05
									178	2.74e-05
									675	2.66e-05
									996	2.64e-05
									1226	2.6e-05
									755	2.58e-05
									1232	2.57e-05
									681	2.56e-05
									140	2.42e-05
									632	2.39e-05
									801	2.38e-05
									806	2.2e-05
									652	2.18e-05
									1238	2.03e-05
									971	2e-05
									282	1.99e-05
									1241	1.98e-05
									564	1.97e-05
									1123	1.96e-05
									727	1.95e-05
									653	1.93e-05
									857	1.93e-05
									760	1.85e-05
									603	1.84e-05
									538	1.81e-05
									366	1.79e-05
									840	1.77e-05
									771	1.67e-05
									1037	1.5e-05
									337	1.44e-05
									1163	1.43e-05
									853	1.43e-05
									821	1.37e-05
									1059	1.34e-05
									443	1.33e-05
									533	1.31e-05
									58	1.24e-05
									118	1.24e-05
									1199	1.19e-05
									719	1.18e-05
									1112	1.18e-05
									865	1.07e-05
									407	1.06e-05
									496	1.02e-05
									350	9.97e-06
									1097	9.73e-06
									74	9.32e-06
									1172	9.25e-06
									808	9.22e-06
									792	8.7e-06
									717	8.57e-06
									1170	8.55e-06
									245	8.49e-06
									1181	8.12e-06
									874	7.4e-06
									1160	7.34e-06
									818	7.25e-06
									452	6.73e-06
									183	6.56e-06
									343	6.54e-06
									1106	6.3e-06
									664	6.02e-06
									855	5.8e-06
									660	5.77e-06
									97	5.77e-06
									329	5.75e-06
									317	5.58e-06
									868	5.08e-06
									152	4.69e-06
									1005	4.56e-06
									596	4.15e-06
									275	4.1e-06
									86	3.92e-06
									1249	3.77e-06
									141	3.01e-06
									1233	2.83e-06
									1184	2.82e-06
									1040	2.48e-06
									225	2.28e-06
									893	2.06e-06
									238	1.48e-06
									61	1.42e-06
									691	1.41e-06
									380	1.39e-06
									23	1.33e-06
									602	1.22e-06
									974	9.04e-07
									879	7.95e-07
									524	7.89e-07
									725	7.83e-07
									395	7.44e-07
									341	5.49e-07
									740	4.69e-07
									223	4.11e-07
									722	4.02e-07
									92	3.24e-07
									84	2.78e-07
									751	1.23e-07
									242	9.98e-08
									1156	9.43e-08
									117	7.84e-08
									557	6.46e-08
									732	2.19e-08
									368	1.66e-08
									983	1.84e-09

## Sheet: Table S1 (C)
Table S1. (C) Gold Human
AC			CT			GAC			LD			MAC			NMBAC			EC
index	score		index	score		index	score		index	score		index	score		index	score		index	score
923	0.094017		322	0.170085		923	0.0792936		1141	0.278401		923	0.091258		639	0.37244		751	0.372272
922	0.0683406		92	0.168807		564	0.0697599		952	0.251098		564	0.0755262		636	0.347954		752	0.347797
901	0.0677386		539	0.159888		576	0.0661078		1078	0.251019		654	0.0705369		574	0.347859		753	0.347724
902	0.0621364		296	0.158126		365	0.0630154		1204	0.250576		331	0.0693913		581	0.345717		754	0.345583
331	0.0611417		95	0.133376		331	0.0628575		448	0.231925		901	0.067893		578	0.345466		755	0.345331
564	0.0601231		686	0.130714		654	0.0599004		574	0.226596		922	0.0662815		571	0.344338		756	0.344206
654	0.0596886		196	0.124816		879	0.0592396		259	0.217767		594	0.0624584		573	0.340055		757	0.339923
746	0.0595243		399	0.121857		901	0.0582108		889	0.215677		271	0.0606644		572	0.339115		758	0.338986
18	0.057587		331	0.120306		699	0.0570351		511	0.209526		902	0.0594424		596	0.337148		759	0.337017
534	0.0553572		77	0.120093		876	0.0565815		466	0.194383		18	0.0577722		582	0.334315		760	0.334185
594	0.0544903		681	0.120008		922	0.0564775		826	0.18982		194	0.0574621		584	0.333383		761	0.333254
326	0.0543398		518	0.119013		369	0.0551601		1015	0.180997		534	0.0563258		575	0.333237		762	0.333109
751	0.0540506		438	0.118447		594	0.0540149		322	0.177216		91	0.0558681		583	0.332499		763	0.33237
920	0.0525643		665	0.118235		271	0.0536205		7	0.173034		576	0.0557039		580	0.330398		764	0.330271
903	0.0517003		190	0.114992		902	0.0524178		963	0.171164		753	0.0552639		594	0.329927		765	0.329798
194	0.0510677		504	0.113847		696	0.0504616		1152	0.167521		710	0.0548273		587	0.329328		766	0.329199
910	0.0500944		308	0.113077		516	0.049089		637	0.165636		920	0.0545723		577	0.329324		767	0.329197
408	0.0496538		639	0.110623		185	0.0489588		592	0.163426		365	0.0541896		599	0.328691		768	0.328563
576	0.0495877		193	0.109591		636	0.0487244		2	0.162292		54	0.0540733		600	0.326498		769	0.326371
753	0.0493526		674	0.109528		91	0.0486683		1096	0.161387		751	0.0522701		590	0.326111		770	0.325983
271	0.0478735		680	0.109082		809	0.0474213		1159	0.15929		781	0.0509113		586	0.325353		771	0.325225
374	0.0469225		441	0.108474		920	0.0467438		632	0.15002		374	0.0506311		576	0.324253		772	0.324128
243	0.0460507		646	0.107838		534	0.0464267		385	0.147629		879	0.050062		585	0.323573		773	0.323446
879	0.0453047		683	0.107823		189	0.0459803		1215	0.146219		894	0.0496975		588	0.323494		774	0.323368
426	0.0450031		340	0.107418		579	0.0458933		529	0.144022		326	0.049377		593	0.323315		775	0.323189
91	0.0449393		63	0.105636		781	0.0457671		277	0.143616		699	0.048698		579	0.323237		776	0.323111
748	0.0442083		648	0.104233		194	0.0453356		700	0.141576		910	0.0485299		589	0.322157		777	0.32203
236	0.0434995		420	0.103355		18	0.0445329		454	0.140775		746	0.0484394		595	0.32214		778	0.322014
365	0.0419231		406	0.101049		293	0.0434201		196	0.14023		903	0.0477758		631	0.320908		779	0.320762
989	0.0416872		662	0.101035		65	0.0424936		1222	0.13991		876	0.0473987		597	0.320543		780	0.320418
411	0.0415383		435	0.100383		894	0.0422998		254	0.136867		369	0.0469872		635	0.320095		781	0.319953
785	0.0415182		14	0.10009		841	0.0412639		248	0.133632		408	0.0467026		591	0.31974		782	0.319615
699	0.0410472		343	0.0996518		374	0.0408026		443	0.131945		384	0.0464002		645	0.316797		783	0.316657
369	0.0404986		597	0.0991545		54	0.0405013		1073	0.128575		204	0.0463256		592	0.312262		784	0.312139
921	0.0403581		590	0.0973538		803	0.0404055		1086	0.127761		841	0.0460106		658	0.31212		785	0.311982
579	0.040017		305	0.0963063		753	0.0401728		265	0.12769		426	0.0457763		652	0.307401		786	0.307264
54	0.039586		319	0.0953767		426	0.0401544		311	0.125267		236	0.0432493		813	0.306313		787	0.306187
710	0.039272		295	0.0949797		710	0.0400451		70	0.125017		711	0.0432205		816	0.306175		788	0.306052
781	0.039248		254	0.0944415		903	0.0398735		500	0.123871		144	0.0431646		598	0.305791		789	0.305672
516	0.0384658		98	0.0941945		629	0.039571		15	0.123612		516	0.043128		642	0.301721		790	0.301587
744	0.0384327		602	0.093864		910	0.0393214		1033	0.123434		243	0.0430369		838	0.300717		791	0.300591
106	0.0379685		210	0.0926495		785	0.0392319		374	0.121927		785	0.0426079		632	0.298972		792	0.298835
163	0.0378994		356	0.0924267		639	0.0390567		403	0.121659		185	0.04226		640	0.298897		793	0.29876
894	0.0376902		637	0.0920785		125	0.0384581		941	0.120415		78	0.0422034		637	0.298746		794	0.298614
876	0.0374389		259	0.0920191		746	0.0378729		25	0.119777		890	0.0420695		815	0.298491		795	0.298366
65	0.0364864		533	0.0908457		408	0.0378611		1212	0.118434		744	0.0420025		129	0.297959		796	0.297824
521	0.0363251		42	0.0907423		748	0.0377467		1149	0.118263		293	0.0417557		819	0.296894		797	0.296773
605	0.0363164		337	0.0901829		350	0.0377447		884	0.118237		696	0.0413671		86	0.296114		798	0.295994
915	0.0360725		538	0.0896561		751	0.0376483		1130	0.117396		350	0.0412493		818	0.293379		799	0.293259
535	0.035916		534	0.0884681		69	0.0360011		626	0.117332		714	0.0410521		71	0.292614		800	0.292496
916	0.0356438		664	0.0879401		711	0.0359341		878	0.11585		198	0.0405326		72	0.291664		801	0.291546
841	0.0356073		13	0.0870712		263	0.0358602		897	0.115806		189	0.0403749		61	0.290765		802	0.290649
144	0.0352999		93	0.0869547		601	0.0357251		267	0.115089		809	0.0403551		68	0.290683		803	0.290565
803	0.0352832		645	0.086437		875	0.0355918		522	0.114683		601	0.0401633		64	0.289687		804	0.28957
413	0.035194		231	0.084789		989	0.0352586		756	0.114639		748	0.0397008		633	0.289239		805	0.289111
913	0.0351798		56	0.084558		204	0.0351813		456	0.114229		921	0.0394627		646	0.288324		806	0.288196
711	0.0348836		175	0.084094		362	0.0350201		585	0.114153		413	0.0390294		62	0.287508		807	0.287394
322	0.0346894		317	0.0836105		275	0.0348332		13	0.113233		113	0.0389876		76	0.287363		808	0.287246
95	0.0344194		301	0.0834862		122	0.0348163		763	0.113001		989	0.038823		87	0.286821		809	0.286705
189	0.0344175		357	0.0834758		714	0.0347458		907	0.112403		535	0.0379749		63	0.286074		810	0.285958
962	0.0339606		405	0.0825429		871	0.0346147		126	0.110857		378	0.0375761		90	0.286015		811	0.285899
482	0.033787		161	0.0812287		113	0.0340865		837	0.110691		803	0.0373935		74	0.285592		812	0.285477
809	0.033776		392	0.0808476		384	0.0340517		563	0.110079		636	0.0373308		84	0.28508		813	0.284965
919	0.0337456		338	0.0786316		691	0.0339766		1089	0.109985		579	0.0373143		73	0.284733		814	0.284618
78	0.0337284		282	0.0780236		921	0.0336828		1004	0.109441		275	0.0370881		130	0.284605		815	0.284477
275	0.0332162		651	0.0763056		546	0.0335158		960	0.10942		605	0.0370182		83	0.283981		816	0.283866
246	0.0332049		191	0.0762546		872	0.0334571		340	0.10825		95	0.0369818		89	0.283807		817	0.283693
566	0.0330284		583	0.0760549		962	0.0334539		645	0.107057		106	0.0367304		125	0.283663		818	0.283537
696	0.0330101		638	0.075689		95	0.0332406		594	0.106724		163	0.0364073		657	0.282759		819	0.282635
896	0.0328371		306	0.0753731		78	0.0332155		63	0.104906		411	0.0361159		65	0.282562		820	0.282449
992	0.0327271		302	0.0745474		286	0.0329993		888	0.104517		629	0.0358153		820	0.282471		821	0.282356
204	0.0326994		49	0.0736378		605	0.0327885		834	0.103003		521	0.0355926		78	0.282264		822	0.28215
113	0.0325152		644	0.0735374		890	0.0327271		947	0.102209		915	0.0352698		66	0.28207		823	0.281957
671	0.0322737		428	0.0721576		413	0.0324247		437	0.10053		338	0.0350392		77	0.281573		824	0.281458
293	0.0321902		195	0.0719065		744	0.0322597		59	0.100221		916	0.0347588		80	0.281334		825	0.28122
636	0.0319093		324	0.0718902		338	0.032124		582	0.0997464		566	0.0345739		67	0.280684		826	0.280571
384	0.0318486		679	0.0714163		62	0.0318631		958	0.0992147		891	0.0341547		85	0.280366		827	0.280253
392	0.0315926		632	0.0711513		144	0.0317236		970	0.0990367		286	0.0340939		81	0.279963		828	0.27985
56	0.0315397		667	0.0705878		454	0.0316594		815	0.0988321		263	0.0338862		75	0.279331		829	0.279217
714	0.0314805		242	0.069677		566	0.0314631		185	0.0987174		246	0.0338255		644	0.277262		151	0.278401
641	0.0311991		287	0.0695885		635	0.0311969		751	0.0985082		992	0.0338215		70	0.277087		830	0.277137
125	0.0310951		240	0.0693372		353	0.031108		1084	0.0980861		65	0.0337291		69	0.277019		831	0.276976
146	0.0310405		28	0.0692056		346	0.0309781		207	0.0974635		708	0.0330831		79	0.275131		832	0.276907
551	0.0305147		390	0.0687955		106	0.0308973		1147	0.0970607		641	0.0326177		82	0.274816		833	0.275018
623	0.0303013		536	0.0685052		243	0.0308057		333	0.0969279		671	0.0325971		814	0.272216		834	0.274704
629	0.0302492		300	0.0682588		411	0.0306197		495	0.0966365		56	0.0325147		88	0.27191		835	0.272103
639	0.029928		341	0.0682409		198	0.0305823		1136	0.0965805		704	0.0321098		831	0.270488		836	0.2718
601	0.0298579		684	0.0679019		163	0.0305111		469	0.0964197		346	0.03155		832	0.270337		837	0.270375
406	0.0298302		436	0.0678942		575	0.0304604		580	0.0963327		871	0.031526		830	0.268839		838	0.270223
286	0.0296083		553	0.0668057		915	0.0303136		1256	0.0958206		913	0.0314125		811	0.268409		839	0.268729
943	0.0293316		47	0.0666379		695	0.0303083		306	0.0955585		888	0.0313562		840	0.266485		840	0.268299
528	0.0292296		527	0.0663646		183	0.0302388		315	0.0936743		623	0.0311866		837	0.265411		841	0.266374
596	0.029036		323	0.0658014		671	0.0301222		531	0.0928645		84	0.0308871		826	0.265262		842	0.265305
454	0.0289418		660	0.0657983		916	0.0300364		258	0.0925904		919	0.0308664		812	0.263848		843	0.265158
549	0.0288375		182	0.0657644		378	0.0299993		1199	0.092156		943	0.0308615		824	0.263609		844	0.263739
464	0.0287763		389	0.0652353		519	0.029863		940	0.0921432		362	0.0307833		135	0.263419		845	0.263496
519	0.0286904		321	0.0648787		535	0.0298207		1099	0.0919725		234	0.0307668		648	0.263176		846	0.263305
420	0.0286061		439	0.0648313		774	0.0297959		569	0.0912142		464	0.0307204		122	0.262825		847	0.26306
778	0.0285203		630	0.0647608		238	0.0297781		630	0.0912052		146	0.0307062		649	0.262318		848	0.262704
350	0.0285119		238	0.0645728		992	0.029479		821	0.0909564		691	0.0304784		651	0.259759		849	0.262203
890	0.0284219		384	0.0642652		363	0.0294542		1077	0.0902862		125	0.0303882		127	0.25956		850	0.259642
346	0.0281925		650	0.0636849		631	0.0293485		689	0.0902327		252	0.0303411		123	0.257659		851	0.259444
929	0.027883		84	0.063295		182	0.029302		1193	0.0902324		420	0.0297098		643	0.25751		852	0.257545
86	0.02782		685	0.063158		549	0.029215		468	0.0899564		656	0.0295587		835	0.256244		853	0.257397
69	0.0274733		75	0.0630453		39	0.0291408		1026	0.0897114		929	0.0294621		817	0.255453		854	0.256142
238	0.0274509		303	0.0629411		521	0.0291047		832	0.0891326		392	0.0294082		126	0.253084		855	0.255352
412	0.02742		616	0.0622183		891	0.0283804		945	0.088871		528	0.0293302		124	0.25273		856	0.25297
252	0.0270253		386	0.0620449		623	0.0281544		910	0.0884387		875	0.0292752		828	0.251531		857	0.252619
479	0.0269755		247	0.0620431		236	0.0274582		279	0.0882844		896	0.0288246		634	0.250266		858	0.251427
575	0.0269548		7	0.0616175		919	0.0274551		693	0.0875309		258	0.0285704		660	0.249539		152	0.251098
185	0.0269201		85	0.0615711		943	0.0270753		133	0.0873614		872	0.0285195		121	0.248666		153	0.251019
656	0.0268503		316	0.0609736		692	0.0267993		1210	0.0869483		197	0.0284632		821	0.248596		154	0.250576
258	0.0268015		427	0.0602711		66	0.0266877		459	0.0859251		596	0.0283553		148	0.24639		859	0.250154
24	0.0265521		589	0.0599145		632	0.0264033		1260	0.0854498		122	0.0282707		303	0.244766		860	0.249427
891	0.0263426		440	0.0597916		708	0.0262839		280	0.0851797		238	0.0282017		659	0.243231		861	0.248553
436	0.0262482		636	0.0590611		572	0.0261633		774	0.0850115		353	0.0279895		825	0.241541		862	0.2485
673	0.0261793		96	0.0588962		119	0.0260978		1067	0.0849935		412	0.027855		823	0.240765		863	0.24628
784	0.0261606		46	0.058611		870	0.0258579		519	0.0843895		655	0.0278525		653	0.240581		864	0.244667
486	0.0260654		378	0.0584962		656	0.0258086		643	0.083783		24	0.027739		142	0.236834		865	0.243123
39	0.0259591		172	0.0582396		347	0.0256154		517	0.0829204		486	0.0277115		833	0.23674		866	0.241444
704	0.0259309		239	0.0580925		655	0.0254615		636	0.0821021		774	0.0276351		638	0.236298		867	0.240669
772	0.0259182		90	0.0577088		888	0.0254259		6	0.0812537		436	0.0275212		305	0.235483		868	0.240474
234	0.0253932		244	0.0572944		420	0.0252263		189	0.0801004		69	0.0273966		822	0.235303		869	0.236729
635	0.0253919		371	0.0569574		913	0.0252218		895	0.0799789		926	0.0273693		829	0.234428		870	0.236646
62	0.0253309		224	0.0568756		772	0.0246993		595	0.0797469		200	0.0272557		655	0.234316		871	0.236192
263	0.0253137		41	0.0567695		392	0.0241744		90	0.0794893		784	0.027244		309	0.233701		872	0.235386
26	0.0252158		350	0.0566399		258	0.0240368		58	0.0794674		62	0.0272408		132	0.232167		873	0.235216
11	0.0250115		625	0.0565535		1003	0.0237672		121	0.079188		639	0.026996		330	0.232114		874	0.234339
655	0.0248345		62	0.0564926		246	0.0235954		310	0.0788238		962	0.0269803		134	0.230469		875	0.23421
905	0.0247444		184	0.0557375		784	0.0235377		270	0.0788227		226	0.0268035		647	0.227888		876	0.233606
425	0.0246938		329	0.0556047		299	0.0235051		1023	0.0785588		406	0.0267122		304	0.227618		877	0.232062
926	0.024536		673	0.0555		704	0.0235028		936	0.0784154		551	0.0266981		150	0.227004		878	0.232018
743	0.0244295		349	0.0554867		804	0.0230302		441	0.0783411		743	0.0266981		834	0.226767		155	0.231925
338	0.0241997		601	0.0549867		32	0.0230076		151	0.0768898		821	0.0264532		827	0.226642		879	0.230363
122	0.0239673		280	0.0545649		896	0.022887		204	0.0762996		1003	0.0264408		138	0.225951		880	0.227787
991	0.0239462		44	0.0544997		412	0.0227104		899	0.0760326		86	0.0264183		149	0.225381		881	0.227521
198	0.0238791		293	0.0543968		596	0.0226033		506	0.0738148		519	0.0263776		650	0.224627		882	0.226903
716	0.0235505		643	0.0541		561	0.0223755		33	0.0737074		311	0.0263371		139	0.224523		883	0.226678
908	0.0235145		43	0.053942		1007	0.0222878		330	0.0731826		81	0.0260185		141	0.221361		156	0.226596
311	0.0232897		433	0.0539316		212	0.0222399		1162	0.0729137		604	0.0259754		322	0.220804		884	0.226551
84	0.0232681		659	0.0534644		56	0.0221517		718	0.0726807		482	0.0256469		836	0.220368		885	0.225851
81	0.0232197		576	0.0533236		673	0.0221358		727	0.0723793		347	0.0255012		306	0.219275		886	0.22528
316	0.0230576		229	0.0533014		541	0.0221096		1224	0.0723662		673	0.0254891		147	0.219086		887	0.224529
212	0.0228936		599	0.0531348		796	0.0220691		447	0.0717271		884	0.0254041		140	0.218218		888	0.224424
918	0.0227103		678	0.0528686		604	0.0220173		674	0.0713784		603	0.0251823		839	0.218132		889	0.221261
631	0.0226889		151	0.0527894		84	0.0218098		405	0.0698436		546	0.025144		136	0.215123		890	0.220711
996	0.0225399		585	0.0527574		344	0.0215572		504	0.0698009		313	0.0250638		145	0.214609		891	0.220284
386	0.0224307		289	0.0526696		486	0.0215544		281	0.0695896		119	0.0247942		133	0.213866		892	0.219187
821	0.0224299		83	0.0525304		436	0.0214542		470	0.0694618		905	0.0247911		128	0.213414		893	0.21899
323	0.0224024		581	0.0524399		862	0.0214476		1125	0.0691763		182	0.0247729		641	0.212485		894	0.218121
437	0.0223832		624	0.0522515		146	0.0214241		122	0.0691506		695	0.0246962		310	0.211812		895	0.218045
362	0.0223757		387	0.0521171		929	0.021397		391	0.0686991		772	0.0246397		308	0.211523		157	0.217767
1003	0.0223127		294	0.0520467		9	0.0212761		29	0.0684284		575	0.0246235		328	0.209754		158	0.215677
782	0.0221361		567	0.0519784		641	0.0211712		380	0.0683413		631	0.0243932		137	0.209584		896	0.215026
937	0.0220509		629	0.0515552		479	0.021094		659	0.067844		26	0.024261		314	0.205998		897	0.214513
344	0.0220193		649	0.051365		234	0.0209668		1010	0.0671804		782	0.0241438		143	0.205238		898	0.213772
405	0.021998		271	0.0512773		603	0.0209334		449	0.0665147		908	0.0241427		321	0.203279		899	0.213319
183	0.0219383		419	0.0506848		366	0.0209234		621	0.066418		381	0.0240415		318	0.200414		900	0.212389
378	0.0218824		666	0.0501681		693	0.0208872		1225	0.0660024		650	0.0239627		327	0.199793		159	0.209526
119	0.0216656		594	0.0501641		932	0.0207756		1098	0.0658521		595	0.0238377		320	0.198913		160	0.194383
604	0.0215613		81	0.0498658		996	0.0206462		44	0.0658368		183	0.0237462		656	0.198252		161	0.18982
330	0.0215386		86	0.0494797		406	0.0204888		1161	0.0649611		233	0.0236989		131	0.196995		162	0.180997
546	0.0214611		330	0.0492655		528	0.0204518		710	0.0647088		842	0.0236785		302	0.196784		163	0.177216
842	0.0214187		385	0.0490929		773	0.0203622		1079	0.0646426		454	0.0236667		669	0.195517		164	0.173034
762	0.021373		569	0.048829		11	0.0202401		28	0.0645399		996	0.0236444		325	0.194093		165	0.171164
774	0.0213566		582	0.0487718		743	0.0201285		663	0.0645219		561	0.0235871		654	0.192914		301	0.170085
906	0.0212492		159	0.0483192		197	0.0201028		905	0.0644027		48	0.0235627		662	0.187265		302	0.168807
393	0.0212292		524	0.047942		129	0.0200888		1071	0.0632333		11	0.0234409		144	0.186702		166	0.167521
836	0.0212255		97	0.0478868		624	0.0200174		819	0.0631025		635	0.0232959		307	0.186131		167	0.165636
822	0.0211235		235	0.0473597		482	0.0199615		1168	0.0619469		932	0.0232949		666	0.183966		168	0.163426
932	0.0210596		328	0.0471279		24	0.019882		1042	0.0616843		363	0.0232678		315	0.183918		169	0.162292
624	0.0210519		342	0.0469982		782	0.019814		532	0.0613509		1007	0.0230026		313	0.183686		170	0.161387
410	0.0210461		494	0.0469942		926	0.0194735		317	0.0609535		843	0.0227862		301	0.182737		303	0.159888
884	0.020972		153	0.0465689		2	0.0192806		1134	0.0609453		39	0.0227143		319	0.182552		171	0.15929
935	0.0209605		267	0.046531		551	0.0192637		406	0.060415		778	0.0226998		667	0.18232		304	0.158126
632	0.020898		424	0.0463959		842	0.0190591		699	0.0602924		836	0.0226931		312	0.181953		172	0.15002
832	0.0206883		298	0.0462474		595	0.019007		1201	0.0602301		918	0.0226634		661	0.180562		173	0.147629
394	0.0206148		391	0.0460551		905	0.0189863		886	0.0597437		589	0.0224526		664	0.180203		174	0.146219
561	0.0205633		82	0.0457778		856	0.0187176		852	0.0587486		588	0.0223786		665	0.179279		175	0.144022
988	0.0205499		55	0.0451538		918	0.0186977		758	0.0585331		377	0.0222015		688	0.17895		176	0.143616
429	0.0203835		11	0.0450425		884	0.0185354		658	0.0580028		51	0.0221828		663	0.178324		177	0.141576
572	0.0202538		491	0.0448576		864	0.0184688		328	0.057851		143	0.0221346		668	0.177792		178	0.140775
581	0.0199922		35	0.0439996		361	0.0183892		1036	0.0573247		796	0.0221218		316	0.177352		179	0.14023
845	0.019814		623	0.0439541		81	0.0183446		781	0.0571527		479	0.0220892		670	0.176479		180	0.13991
875	0.0198132		76	0.0438235		35	0.0183208		909	0.0571284		889	0.0220581		329	0.175289		181	0.136867
603	0.0198092		245	0.043674		869	0.0180502		18	0.0570287		549	0.0219726		675	0.171111		182	0.133632
607	0.0198027		588	0.0435005		252	0.0180408		1075	0.0569254		572	0.0219648		672	0.17098		305	0.133376
200	0.0197774		203	0.0432975		843	0.0180015		771	0.0566383		138	0.0218452		674	0.17095		183	0.131945
650	0.019626		292	0.0432713		946	0.0179755		900	0.056353		425	0.021738		323	0.169681		306	0.130714
770	0.0194983		170	0.0431164		48	0.0179014		882	0.0562534		607	0.0217339		686	0.169203		184	0.128575
315	0.0194709		641	0.0430883		464	0.0178751		393	0.0558228		380	0.0217095		687	0.168794		185	0.127761
595	0.0193208		525	0.0428909		863	0.0178707		911	0.0558174		393	0.0216693		311	0.167814		186	0.12769
911	0.019268		610	0.0423651		873	0.0178242		1100	0.055573		692	0.0215077		317	0.167702		187	0.125267
835	0.0191552		418	0.0422926		937	0.0177851		88	0.0554529		405	0.0214964		678	0.167568		188	0.125017
241	0.0191368		236	0.0420625		845	0.0176827		1083	0.0554132		762	0.0214605		682	0.167461		307	0.124816
796	0.019128		526	0.0420599		650	0.0175748		1203	0.0550776		845	0.0212023		690	0.166831		189	0.123871
313	0.0189349		429	0.0417802		284	0.0174723		407	0.0549562		624	0.0208832		679	0.166188		190	0.123612
224	0.01891		431	0.0417342		336	0.0174601		655	0.0542672		17	0.0208176		146	0.165724		191	0.123434
332	0.0188751		574	0.041525		425	0.0173333		260	0.0538479		870	0.0208012		681	0.164625		192	0.121927
872	0.0184203		257	0.0415169		86	0.0172993		1088	0.0538436		930	0.0207205		324	0.163414		308	0.121857
947	0.0183937		205	0.0414256		381	0.0172977		296	0.0538247		707	0.0207161		677	0.162307		193	0.121659
336	0.0183809		677	0.0406939		515	0.0172808		485	0.0537316		332	0.0206397		676	0.161569		194	0.120415
17	0.0183705		5	0.0404918		200	0.017153		688	0.0534328		632	0.0205713		671	0.161162		309	0.120306
888	0.0182984		258	0.0404193		960	0.017094		1140	0.053173		946	0.0205563		689	0.160299		310	0.120093
536	0.0182582		496	0.0403416		6	0.0170629		8	0.0528531		616	0.0202445		685	0.159885		311	0.120008
21	0.0181373		291	0.0397272		589	0.0170538		894	0.0523824		336	0.0202259		683	0.159055		195	0.119777
976	0.0181223		587	0.0393199		779	0.0170065		1003	0.0523381		823	0.0202252		673	0.157995		312	0.119013
804	0.0181152		299	0.0392394		405	0.0169924		558	0.0515365		315	0.0201634		680	0.15787		313	0.118447
758	0.018093		404	0.0391685		988	0.0169901		369	0.0511997		533	0.0200396		684	0.153085		196	0.118434
708	0.0180166		336	0.039027		908	0.0169647		1014	0.0511733		437	0.0200179		746	0.146705		197	0.118263
616	0.0179493		27	0.0390022		452	0.0169542		269	0.0510697		804	0.019875		159	0.145408		198	0.118237
533	0.0179471		572	0.0385669		607	0.0168668		844	0.0510209		581	0.0198391		744	0.144435		314	0.118235
515	0.0179321		219	0.0384025		332	0.016866		978	0.0504951		66	0.0198338		152	0.142441		199	0.117396
197	0.0178874		218	0.0383523		233	0.0167567		1226	0.0503744		557	0.0198144		157	0.142213		200	0.117332
353	0.0177862		380	0.0381407		778	0.0167564		1035	0.0499869		272	0.0198045		156	0.141823		201	0.11585
1007	0.0177367		561	0.0380983		857	0.0167121		1192	0.0496647		783	0.0197676		160	0.141621		202	0.115806
452	0.017703		592	0.0376683		770	0.016688		396	0.0496099		541	0.0197497		153	0.141372		203	0.115089
347	0.0176755		497	0.0375853		616	0.0166682		1124	0.0494228		429	0.0197226		326	0.141275		315	0.114992
262	0.0176343		383	0.0375606		783	0.0166473		222	0.0494096		716	0.0195122		154	0.140653		204	0.114683
870	0.0175847		671	0.0373616		861	0.0165984		708	0.0493302		653	0.019408		155	0.134992		205	0.114639
363	0.0175652		154	0.0373392		889	0.0165861		1061	0.0492901		32	0.019405		151	0.134427		206	0.114229
768	0.0174579		270	0.0371406		565	0.0165827		1138	0.049147		684	0.0192538		164	0.132857		207	0.114153
9	0.0174474		198	0.0370529		342	0.0164576		1008	0.0490575		229	0.0192083		178	0.132844		316	0.113847
787	0.0172752		249	0.0364012		557	0.0163978		926	0.0487173		937	0.0191376		165	0.13206		208	0.113233
317	0.0172182		286	0.0362039		935	0.0163386		1115	0.0486648		299	0.0191294		158	0.131974		317	0.113077
66	0.0171524		627	0.0361898		272	0.0161826		1021	0.0477935		887	0.0190894		180	0.131611		209	0.113001
756	0.0171323		241	0.0360301		860	0.0161322		432	0.0477349		906	0.019075		162	0.131023		210	0.112403
51	0.0170446		320	0.0358211		377	0.0160512		1197	0.0476972		323	0.0189163		743	0.130216		211	0.110857
823	0.0170333		382	0.0357346		936	0.0160495		877	0.0475953		737	0.018915		172	0.128278		212	0.110691
684	0.0170301		34	0.0352424		768	0.0160106		721	0.047588		372	0.0189077		169	0.128261		318	0.110623
930	0.0167889		307	0.0349238		588	0.0159964		809	0.0474658		344	0.0188169		168	0.128071		213	0.110079
936	0.0167507		226	0.0348748		850	0.0158909		1209	0.0473681		787	0.0187715		733	0.127555		214	0.109985
960	0.0166757		207	0.0345652		716	0.0158599		634	0.0472011		410	0.018731		161	0.126969		319	0.109591
588	0.016669		273	0.0344896		762	0.0158478		191	0.0469598		201	0.0187242		167	0.125525		320	0.109528
946	0.016494		275	0.034004		26	0.0158368		69	0.0467891		935	0.0187002		234	0.125285		215	0.109441
527	0.0164301		169	0.0339497		558	0.015791		752	0.0463567		205	0.018682		175	0.125183		216	0.10942
233	0.016412		515	0.0336211		545	0.0157797		720	0.0463284		386	0.0186772		236	0.125113		321	0.109082
871	0.0163655		642	0.0334391		262	0.0157436		97	0.04619		379	0.0186456		171	0.124625		322	0.108474
260	0.0163371		348	0.033377		393	0.0157157		538	0.0461693		560	0.0185944		173	0.124317		217	0.10825
843	0.0162716		368	0.0333192		143	0.0156808		412	0.0460547		768	0.0185807		176	0.123854		323	0.107838
272	0.0162493		194	0.0332433		653	0.0156621		596	0.0460224		536	0.0185246		177	0.12152		324	0.107823
398	0.0160557		595	0.0331601		326	0.0155436		533	0.0457536		558	0.018489		170	0.121084		325	0.107418
206	0.0160384		25	0.0330341		560	0.0154632		364	0.0457451		284	0.0184548		736	0.121071		218	0.107057
529	0.0159761		670	0.0328842		1014	0.0154005		65	0.0455806		649	0.0184297		166	0.120381		219	0.106724
939	0.0158917		327	0.0327242		226	0.0153947		642	0.0454704		9	0.0183681		724	0.120043		326	0.105636
391	0.0156872		546	0.0324719		51	0.0152956		214	0.045191		47	0.0182583		174	0.119381		220	0.104906
779	0.0156774		334	0.0324047		787	0.0152287		553	0.0448327		739	0.0182311		179	0.119281		221	0.104517
531	0.0156435		183	0.0321402		429	0.0151682		223	0.0447788		936	0.0181448		741	0.118617		327	0.104233
46	0.0156285		288	0.0320952		571	0.0151265		1167	0.044729		773	0.0181036		730	0.117817		328	0.103355
975	0.0156239		148	0.0320851		5	0.0150683		427	0.0445432		241	0.0180165		39	0.11706		222	0.103003
143	0.0154387		565	0.0318137		138	0.0150162		256	0.0445141		342	0.0179908		369	0.11697		223	0.102209
707	0.0154159		672	0.0317985		559	0.0149663		973	0.0442908		976	0.0179219		731	0.116956		329	0.101049
466	0.0153737		37	0.031769		707	0.0149135		890	0.0441638		192	0.0178049		734	0.116951		330	0.101035
2	0.0153697		22	0.0317409		669	0.0148752		128	0.0438532		587	0.0176031		163	0.115627		224	0.10053
299	0.0152838		30	0.0316995		684	0.0148632		54	0.0438519		529	0.0175798		224	0.114973		331	0.100383
284	0.0151552		256	0.0309177		380	0.0148507		999	0.0437019		850	0.0174576		223	0.114344		225	0.100221
773	0.015096		255	0.0306286		448	0.0147479		91	0.0436066		228	0.0173638		737	0.11425		332	0.10009
544	0.0150695		189	0.0305719		264	0.014689		918	0.0434646		565	0.0173392		742	0.113306		226	0.0997464
380	0.0150151		187	0.0305136		930	0.014402		484	0.0429083		638	0.01732		365	0.111995		333	0.0996518
381	0.014959		152	0.0299232		998	0.0143768		342	0.0420357		911	0.0172002		739	0.111509		227	0.0992147
138	0.0149342		618	0.0299067		512	0.014351		547	0.0411687		559	0.0171796		727	0.110695		334	0.0991545
783	0.0149131		532	0.0298963		906	0.0142639		1060	0.0407331		212	0.0171713		728	0.110629		228	0.0990367
226	0.0146161		537	0.0298407		181	0.0142212		92	0.0404967		46	0.0171239		721	0.109003		229	0.0988321
557	0.0146094		48	0.0294022		533	0.0141293		290	0.0403682		489	0.0171206		226	0.108019		230	0.0987174
997	0.0145996		634	0.0293184		997	0.014129		117	0.04017		947	0.0171113		750	0.106384		231	0.0985082
998	0.0145924		370	0.0292467		887	0.0140824		684	0.040066		998	0.0170838		735	0.105819		232	0.0980861
589	0.0144034		617	0.0291618		410	0.0139286		180	0.0400145		756	0.0170193		723	0.105559		233	0.0974635
649	0.0143997		54	0.0291221		260	0.0138792		571	0.0397616		2	0.0169863		732	0.105447		335	0.0973538
472	0.0142863		74	0.0289969		364	0.01379		4	0.0397108		83	0.0169783		738	0.105444		234	0.0970607
638	0.0142044		398	0.0285177		184	0.0137661		716	0.0397084		527	0.0169232		233	0.105123		235	0.0969279
993	0.0142008		274	0.02851		437	0.0137168		1094	0.0396745		988	0.016917		227	0.104143		236	0.0966365
974	0.0141511		426	0.0284845		991	0.0136963		348	0.0393482		547	0.0167072		749	0.103582		237	0.0965805
691	0.0140511		333	0.0283456		1020	0.013671		76	0.0391415		394	0.0166005		216	0.103335		238	0.0964197
917	0.0140041		39	0.0282911		70	0.0135938		1255	0.0390936		227	0.0165979		228	0.103248		239	0.0963327
483	0.0139479		181	0.0282245		947	0.013591		278	0.0390555		862	0.0165497		725	0.102611		336	0.0963063
489	0.0139265		335	0.0280383		649	0.0135107		1016	0.0388962		991	0.0164683		879	0.101694		240	0.0958206
5	0.0139208		8	0.0279219		322	0.0133932		1188	0.0385044		960	0.0164429		710	0.101672		241	0.0955585
473	0.0139139		663	0.0278273		17	0.0133799		1062	0.0383534		731	0.0164175		726	0.101537		337	0.0953767
653	0.0138968		246	0.0275724		205	0.0133575		1106	0.0383173		648	0.01618		549	0.101518		338	0.0949797
948	0.0138592		252	0.0274914		542	0.0133508		653	0.0380778		316	0.0160965		231	0.100978		339	0.0944415
129	0.0138225		550	0.0274287		46	0.0133259		101	0.037993		948	0.0160022		729	0.10095		340	0.0941945
131	0.0137909		548	0.0272655		47	0.0132301		638	0.037923		224	0.0158697		220	0.100702		1	0.094017
737	0.0137384		376	0.0270144		379	0.0132132		288	0.0376904		974	0.0157686		747	0.100646		341	0.093864
182	0.0136482		6	0.0268646		581	0.0131924		216	0.037637		199	0.0157525		232	0.0989122		242	0.0936743
23	0.013644		676	0.0265623		939	0.0130494		616	0.0375155		473	0.0157453		240	0.0985691		243	0.0928645
477	0.0136148		40	0.0264833		214	0.0130233		275	0.0375098		23	0.0157241		722	0.0980311		342	0.0926495
228	0.0134812		373	0.0264414		911	0.0129895		202	0.0374688		366	0.015664		211	0.0973866		244	0.0925904
861	0.0134507		596	0.0260321		201	0.0129652		1025	0.0372901		361	0.0156389		225	0.0970111		343	0.0924267
448	0.0134379		179	0.0259362		536	0.0128412		789	0.0370997		139	0.0155843		222	0.0960797		245	0.092156
422	0.0134193		158	0.0259239		229	0.012771		81	0.0368373		856	0.0155636		740	0.0958463		246	0.0921432
404	0.0133774		250	0.0258249		948	0.0127488		458	0.0366627		770	0.0155509		213	0.0957919		344	0.0920785
587	0.0132973		347	0.025801		61	0.0127256		12	0.036462		21	0.0155287		218	0.0955496		345	0.0920191
846	0.0132713		32	0.0253558		786	0.0123934		949	0.0364501		997	0.0153528		237	0.0950803		247	0.0919725
342	0.0132391		512	0.0251812		354	0.0122274		78	0.0362455		758	0.0153508		214	0.0949449		451	0.091258
372	0.0132257		51	0.0245278		215	0.0121588		823	0.0361743		262	0.0150503		229	0.0940625		248	0.0912142
227	0.0131644		281	0.024345		737	0.0121003		703	0.0361277		939	0.0150256		239	0.0918326		249	0.0912052
792	0.0130769		613	0.024144		659	0.012046		1144	0.0358721		590	0.0149422		217	0.0900325		250	0.0909564
264	0.0130396		253	0.0239887		587	0.0119592		1251	0.0356076		515	0.0148857		876	0.0892417		346	0.0908457
401	0.0129422		377	0.0237395		372	0.011948		16	0.0355868		786	0.0148631		221	0.0886644		347	0.0907423
419	0.012908		326	0.0234235		370	0.0119056		648	0.0355511		917	0.0146638		230	0.0881054		251	0.0902862
591	0.0128633		531	0.0233804		739	0.0118018		27	0.0354583		104	0.0146413		745	0.0874052		252	0.0902327
32	0.0127907		61	0.0233428		394	0.0117409		810	0.0353858		391	0.0146319		923	0.0867497		253	0.0902324
377	0.0127102		79	0.0231925		63	0.0117305		972	0.0353199		817	0.0146216		546	0.0847828		348	0.0901829
396	0.0126639		517	0.0230862		489	0.0117268		343	0.0352368		693	0.0145778		219	0.0835305		254	0.0899564
104	0.0125866		174	0.02291		297	0.01161		249	0.0350962		77	0.0145494		194	0.081926		255	0.0897114
827	0.0125239		593	0.0226462		993	0.011585		139	0.0350025		483	0.0143981		215	0.0818307		349	0.0896561
904	0.0124777		88	0.0225093		186	0.0115501		386	0.0349094		606	0.0143955		711	0.0803308		256	0.0891326
565	0.0124007		547	0.0224667		790	0.0115354		1177	0.0348815		993	0.0143767		716	0.0802201		257	0.088871
83	0.0123821		243	0.0224272		836	0.011488		494	0.0348664		131	0.0143639		714	0.0792406		350	0.0884681
856	0.0123688		91	0.0224019		606	0.0114768		1142	0.0348202		584	0.0142236		609	0.0782885		258	0.0884387
139	0.0123554		530	0.0222075		491	0.011416		431	0.0347472		373	0.0142219		35	0.0779935		259	0.0882844
438	0.0123412		354	0.0221992		792	0.0113669		1183	0.034573		466	0.0141741		235	0.0760046		351	0.0879401
48	0.0122242		233	0.0219634		547	0.0113136		1207	0.0344689		975	0.0141485		363	0.0755637		260	0.0875309
403	0.0122231		620	0.0219589		340	0.0113065		445	0.0344688		264	0.0141303		704	0.0755114		261	0.0873614
612	0.0121974		176	0.0218572		934	0.0112903		476	0.0344644		145	0.0141082		212	0.0731078		352	0.0870712
101	0.0121438		232	0.0218568		917	0.0112241		573	0.034394		79	0.0140768		628	0.0716592		353	0.0869547
934	0.0121167		94	0.0209653		386	0.0112101		747	0.0343729		448	0.0139726		362	0.069572		262	0.0869483
6	0.0121045		1	0.020932		529	0.0111844		1057	0.0342348		848	0.0139217		619	0.0689504		354	0.086437
325	0.012067		20	0.0208277		83	0.0111664		769	0.0341122		137	0.0139205		32	0.0687222		263	0.0859251
102	0.0119608		208	0.020726		126	0.0109923		711	0.033971		659	0.0138864		620	0.0684251		264	0.0854498
512	0.0119199		114	0.0205868		104	0.0109839		384	0.0339036		422	0.0137464		622	0.0682165		265	0.0851797
786	0.0119054		279	0.0205322		648	0.0109067		252	0.0338866		790	0.0137386		204	0.0677754		266	0.0850115
71	0.0118169		132	0.0204975		192	0.0108571		175	0.0337173		869	0.013726		608	0.0664893		267	0.0849935
659	0.0118074		635	0.0204777		731	0.010852		1041	0.0335599		709	0.0137048		627	0.0662442		355	0.084789
669	0.0118046		575	0.0204723		130	0.0108429		221	0.0335364		835	0.0136865		617	0.0659398		356	0.084558
606	0.0117706		447	0.0201303		497	0.0108363		1151	0.0331824		419	0.0136863		707	0.0656356		268	0.0843895
887	0.011742		425	0.0201179		483	0.0108295		421	0.0331511		779	0.0136711		602	0.0652501		357	0.084094
560	0.0117379		551	0.0197836		419	0.0108018		692	0.0328681		92	0.0135807		541	0.0649752		269	0.083783
539	0.0117376		157	0.0195206		179	0.0107426		1246	0.0328413		825	0.0135525		618	0.0649701		358	0.0836105
670	0.0117127		12	0.0193637		661	0.0107409		80	0.0327961		857	0.0135338		613	0.0647705		359	0.0834862
693	0.0117112		251	0.0192259		976	0.0106498		112	0.0327954		438	0.0134504		630	0.064592		360	0.0834758
817	0.0116884		138	0.0191233		590	0.0106295		755	0.0321818		129	0.0134473		626	0.0644188		270	0.0829204
850	0.0116633		401	0.0191123		341	0.0106061		179	0.0321638		398	0.0134284		922	0.0641274		361	0.0825429
92	0.0116619		365	0.0189835		795	0.0105853		1146	0.0321368		472	0.0133613		426	0.0638425		271	0.0821021
47	0.0116595		364	0.018978		848	0.0105304		629	0.0319675		6	0.0133585		33	0.0636406		272	0.0812537
661	0.0115104		591	0.0188939		756	0.0104829		1104	0.031698		260	0.0132783		698	0.0634992		362	0.0812287
541	0.0114564		149	0.0186511		741	0.0104481		464	0.0316641		961	0.0132676		366	0.0629284		363	0.0808476
983	0.0114347		64	0.0185886		199	0.0102989		268	0.0313447		1014	0.0132311		708	0.062306		273	0.0801004
366	0.0114223		615	0.018522		391	0.0102494		537	0.0312709		647	0.0131945		611	0.0615144		274	0.0799789
584	0.0113889		284	0.0184523		349	0.0102416		160	0.0312358		934	0.0131579		901	0.061487		275	0.0797469
648	0.0113503		579	0.0183867		956	0.0102192		742	0.031172		35	0.0130842		606	0.0610944		276	0.0794893
741	0.0113421		397	0.0182677		228	0.0101825		575	0.0309634		531	0.013008		621	0.060964		277	0.0794674
1014	0.0113174		237	0.0182418		92	0.0100853		764	0.0309103		571	0.0129221		625	0.0609303		601	0.0792936
409	0.0112911		70	0.0181112		23	0.0100372		722	0.0309029		317	0.0129067		615	0.0608789		278	0.079188
205	0.0111878		498	0.0180058		974	0.00992924		695	0.0308595		741	0.0128898		614	0.0604497		279	0.0788238
790	0.011176		4	0.017868		961	0.00990341		378	0.0306982		864	0.0128634		875	0.0603594		280	0.0788227
133	0.0111324		432	0.0177037		527	0.00987301		847	0.0306308		873	0.0128466		603	0.0598018		364	0.0786316
400	0.0111186		578	0.0176736		473	0.0098715		141	0.0306061		883	0.0128296		370	0.0595789		281	0.0785588
1020	0.0111152		669	0.0176672		477	0.0097983		567	0.0300543		846	0.0128131		604	0.0590539		282	0.0784154
571	0.0108323		416	0.017516		810	0.00974536		17	0.0299348		231	0.0128074		610	0.0588877		283	0.0783411
956	0.0107682		614	0.0175124		769	0.00971553		467	0.0295382		661	0.0126809		601	0.0581077		365	0.0780236
360	0.0107504		571	0.01747		866	0.00967726		22	0.0295154		669	0.0126654		902	0.0575051		284	0.0768898
864	0.0107161		468	0.017254		21	0.00962811		625	0.0294391		360	0.0126226		720	0.0572174		366	0.0763056
324	0.0106927		367	0.0171442		422	0.0096168		134	0.0293173		591	0.0125167		612	0.0570756		285	0.0762996
547	0.0106656		276	0.0171397		846	0.00961564		1012	0.0292757		497	0.0124779		198	0.0567327		367	0.0762546
733	0.0106634		485	0.0170454		663	0.00957738		289	0.0292175		223	0.0124197		545	0.0565435		368	0.0760549
179	0.0106382		529	0.0170289		266	0.00955369		264	0.029177		860	0.0123626		200	0.0562632		286	0.0760326
862	0.0105191		573	0.016736		971	0.00952328		620	0.0290175		376	0.0122901		40	0.0562332		369	0.075689
307	0.0104614		611	0.0166563		139	0.00950575		57	0.0286852		593	0.0122795		607	0.0560339		452	0.0755262
145	0.0104402		112	0.0165993		131	0.00947313		411	0.0286816		101	0.0122128		31	0.0558745		370	0.0753731
590	0.0103721		407	0.0164769		101	0.00940794		86	0.0285797		814	0.0121856		871	0.0557631		371	0.0745474
481	0.01036		523	0.0164282		373	0.00934565		1020	0.0285426		71	0.0121773		605	0.0552836		287	0.0738148
739	0.0103419		310	0.016358		593	0.00934199		853	0.0285255		512	0.0121456		206	0.0549357		288	0.0737074
166	0.0103102		344	0.0161715		453	0.0092639		1037	0.0285235		861	0.0119976		36	0.0548018		372	0.0736378
558	0.010209		155	0.0161704		151	0.00926207		987	0.0284212		334	0.0118306		616	0.0542917		373	0.0735374
35	0.0102045		351	0.0161355		241	0.00923747		247	0.0283825		863	0.0116886		624	0.0540256		289	0.0731826
201	0.0101692		53	0.0159488		274	0.00916476		164	0.028194		5	0.0116827		872	0.0532463		290	0.0729137
869	0.0101598		500	0.0158393		591	0.00915333		119	0.0281782		179	0.0116764		197	0.0529656		291	0.0726807
695	0.010072		204	0.0158056		219	0.0091386		1214	0.028171		206	0.011669		701	0.0526535		292	0.0723793
251	0.0100098		200	0.0157024		584	0.00910709		1205	0.0280061		136	0.0115909		629	0.0523652		293	0.0723662
136	0.0100034		600	0.0156922		77	0.0091032		548	0.0279758		792	0.0115615		943	0.0522636		374	0.0721576
863	0.00996745		188	0.0155573		294	0.00908476		154	0.0279536		50	0.0115491		623	0.0512607		375	0.0719065
22	0.0098661		482	0.0154846		438	0.00905956		242	0.0279077		539	0.01151		920	0.049769		376	0.0718902
192	0.00985431		177	0.0153866		334	0.00903613		1220	0.0278709		181	0.0114861		903	0.0492723		294	0.0717271
663	0.00975926		413	0.0151748		1016	0.00903542		358	0.0277421		133	0.0113698		516	0.0491217		377	0.0714163
1016	0.00973614		495	0.0149927		758	0.00895907		422	0.0277041		151	0.0113397		703	0.0482225		295	0.0713784
912	0.0097283		38	0.0149683		79	0.00894885		373	0.0276174		452	0.011317		873	0.0478096		378	0.0711513
720	0.00966366		430	0.0148014		709	0.00893996		1163	0.0275307		663	0.0112898		361	0.0478084		379	0.0705878
250	0.00965948		502	0.0147904		145	0.0089321		794	0.0272215		385	0.0112855		99	0.0476134		453	0.0705369
254	0.00964136		33	0.0144022		638	0.00888456		562	0.0271518		55	0.0112361		910	0.0469822		296	0.0698436
731	0.00961544		290	0.0143316		806	0.00884195		508	0.027071		956	0.0111733		542	0.0467396		297	0.0698009
407	0.00960682		221	0.0142067		816	0.00872491		368	0.0269356		1020	0.0111509		694	0.0461377		602	0.0697599
274	0.00958072		513	0.0138959		227	0.00869607		647	0.0266793		733	0.0111383		93	0.0456435		380	0.069677
76	0.00955193		437	0.0138797		398	0.00864613		557	0.026678		983	0.0110806		408	0.0456185		298	0.0695896
476	0.00952042		457	0.0138294		31	0.0086307		474	0.0264248		166	0.0110606		713	0.0454068		381	0.0695885
70	0.009512		180	0.0137439		311	0.00849564		436	0.0260888		340	0.0110416		454	0.0451308		299	0.0694618
692	0.00949412		562	0.0135816		742	0.00849517		43	0.0259494		545	0.0109252		57	0.0447956		454	0.0693913
223	0.00949168		277	0.0133002		166	0.00845036		125	0.0259385		769	0.0109208		238	0.0443897		382	0.0693372
647	0.00946508		206	0.0131862		360	0.0084418		1150	0.0258471		193	0.0109161		436	0.0442179		383	0.0692056
742	0.00946224		263	0.0130411		137	0.00831262		600	0.0258141		401	0.0108962		112	0.0441412		300	0.0691763
995	0.00945009		555	0.0130344		975	0.00830553		678	0.0257238		548	0.0108888		98	0.0439133		384	0.0687955
767	0.00941274		434	0.0128911		503	0.00825662		953	0.0256794		274	0.0108869		519	0.0437455		385	0.0685052
213	0.00940073		598	0.0126538		472	0.00821841		1087	0.0256125		383	0.01084		367	0.0436515		2	0.0683406
188	0.00935601		519	0.0125497		531	0.00821478		951	0.0255872		403	0.0107563		719	0.0431628		386	0.0682588
718	0.00933431		505	0.0120412		832	0.00821455		989	0.0255464		49	0.0107231		364	0.0431573		387	0.0682409
685	0.00932272		379	0.0119007		647	0.00820395		144	0.0254814		542	0.0106661		188	0.0426917		388	0.0679019
847	0.00929792		89	0.0118924		821	0.0081937		499	0.0254219		477	0.0106454		109	0.0424162		389	0.0678942
860	0.00929089		311	0.0117788		954	0.00814349		26	0.0253009		602	0.01063		192	0.0422711		455	0.067893
231	0.00924739		230	0.0117648		670	0.00811318		489	0.0252888		612	0.0106013		105	0.0421605		3	0.0677386
602	0.00922042		501	0.0117413		612	0.00810119		159	0.0252655		250	0.0105769		425	0.0418517		390	0.0668057
334	0.0092137		481	0.0116115		664	0.00809976		48	0.0251977		404	0.0105074		437	0.0414333		391	0.0666379
548	0.00919493		211	0.0116049		563	0.00808536		750	0.0251842		341	0.0104932		94	0.0413174		392	0.0663646
599	0.00916435		417	0.0115573		609	0.00806139		41	0.0251449		102	0.0103261		96	0.0411047		456	0.0662815
141	0.00911521		412	0.0115446		729	0.00804548		425	0.0249233		742	0.0101834		705	0.0410968		603	0.0661078
137	0.00903882		619	0.01154		64	0.00804043		536	0.0249181		409	0.010177		205	0.0410829		393	0.0658014
698	0.00899684		541	0.0114448		231	0.00803108		426	0.0249048		610	0.0101559		97	0.0408982		394	0.0657983
50	0.0088868		622	0.0112277		625	0.00801056		188	0.0248214		468	0.0101317		103	0.0404982		395	0.0657644
383	0.008872		209	0.0111822		102	0.00799892		988	0.0247584		61	0.0100782		111	0.0403705		396	0.0652353
77	0.00885587		104	0.0111738		539	0.00794119		986	0.0245799		76	0.00993633		411	0.0399937		397	0.0648787
954	0.00884539		160	0.011165		416	0.00787123		778	0.024527		254	0.00993119		100	0.0395907		398	0.0648313
248	0.00881597		603	0.0109999		376	0.0078294		898	0.0243988		349	0.00993104		203	0.0391828		399	0.0647608
74	0.00881012		26	0.010934		801	0.00781639		349	0.0243412		400	0.00991526		9	0.0390678		400	0.0645728
857	0.00880737		197	0.0109208		1	0.00776066		1114	0.024317		251	0.00984222		552	0.0390061		401	0.0642652
20	0.00878939		375	0.0108437		404	0.00772852		1129	0.0241954		795	0.00977168		115	0.0389378		402	0.0636849
460	0.00876428		71	0.0108135		71	0.00766646		1066	0.0241868		599	0.00974976		92	0.0388322		403	0.063295
530	0.00876292		121	0.0106933		883	0.00765316		231	0.0240799		214	0.00972166		429	0.0388199		404	0.063158
61	0.00871112		315	0.01063		854	0.00764781		749	0.0238129		664	0.00958365		201	0.0387568		405	0.0630453
506	0.00862546		584	0.0105711		602	0.00760761		657	0.0237391		52	0.00955915		110	0.0387058		604	0.0630154
395	0.00862068		222	0.0103499		343	0.00751317		1018	0.0237293		364	0.00955443		921	0.0386059		406	0.0629411
329	0.00861087		631	0.0101021		159	0.00743456		305	0.0236321		184	0.00946371		935	0.0379226		605	0.0628575
848	0.00858905		24	0.0100742		303	0.0074059		925	0.0236212		530	0.0094429		567	0.0377004		457	0.0624584
625	0.00856234		69	0.00989257		403	0.0073702		510	0.023474		904	0.00941136		937	0.0376716		407	0.0622183
987	0.00849939		186	0.00977854		1019	0.00729812		697	0.0233253		407	0.00936338		108	0.0374065		4	0.0621364
873	0.00848848		325	0.00959772		466	0.00729562		861	0.0232782		670	0.00935711		34	0.0373119		408	0.0620449
229	0.00838053		111	0.00944729		259	0.0072798		295	0.0231312		553	0.00930443		120	0.0371597		409	0.0620431
511	0.00834823		126	0.00931877		117	0.00724207		453	0.0228705		354	0.00919257		947	0.037152		410	0.0616175
159	0.00834358		29	0.00920184		136	0.007226		116	0.0228244		141	0.00915681		118	0.0370351		411	0.0615711
130	0.00828427		586	0.00920081		33	0.00710123		546	0.0227133		396	0.00915206		116	0.0362848		5	0.0611417
453	0.00826187		355	0.00901363		401	0.00706501		930	0.0225676		213	0.00907057		932	0.0362053		412	0.0609736
559	0.0082123		173	0.00897074		55	0.00701628		1109	0.0225468		20	0.00900751		107	0.0360694		458	0.0606644
151	0.00816153		57	0.00890626		1008	0.00699814		477	0.0224359		416	0.00891735		101	0.0360508		413	0.0602711
909	0.00815881		540	0.00883189		206	0.00693035		846	0.0223631		259	0.00888016		102	0.035983		6	0.0601231
545	0.00815861		139	0.00874172		511	0.00691772		1213	0.0223373		22	0.00887791		104	0.0359168		414	0.0599145
268	0.00813232		580	0.00868587		383	0.00689507		1046	0.0223333		954	0.00885392		452	0.0358198		606	0.0599004
889	0.00811926		422	0.00866946		409	0.00687806		1166	0.022332		912	0.00885354		413	0.035724		415	0.0597916
497	0.00811654		544	0.00864328		599	0.00687505		193	0.0223312		74	0.00885224		543	0.035633		7	0.0596886
114	0.00811185		268	0.00862806		898	0.00687465		741	0.0223012		833	0.00885221		117	0.0354442		8	0.0595243
55	0.00809877		653	0.00858793		835	0.00685863		1101	0.0221703		460	0.00880565		915	0.0350689		459	0.0594424
553	0.00803644		363	0.00853067		296	0.00685384		457	0.0220665		736	0.00880468		913	0.0350361		607	0.0592396
373	0.00794079		165	0.00840097		304	0.00680831		286	0.0220277		70	0.00874101		709	0.0347158		416	0.0590611
282	0.00789226		474	0.00837721		569	0.00677355		475	0.0220075		174	0.00869509		916	0.0345652		417	0.0588962
610	0.00788037		23	0.00836921		193	0.0067641		1230	0.0219546		503	0.00867439		748	0.0345219		418	0.058611
416	0.00785221		564	0.00825494		235	0.00675255		706	0.0219404		544	0.008674		960	0.0342205		419	0.0584962
376	0.0078255		443	0.00825409		610	0.00671206		401	0.0218905		754	0.00865936		898	0.0336985		420	0.0582396
496	0.00780543		225	0.0081611		766	0.00670981		218	0.0217184		766	0.0086468		114	0.0335161		608	0.0582108
370	0.00778738		414	0.00794312		1013	0.00668012		34	0.0216993		569	0.00863964		210	0.0334492		421	0.0580925
294	0.0077777		68	0.00771608		282	0.006574		42	0.021626		100	0.00854793		702	0.0333611		460	0.0577722
893	0.00777115		87	0.00766019		50	0.00655927		740	0.0214099		685	0.00854547		697	0.0332859		422	0.0577088
593	0.0077404		448	0.00759884		49	0.00655433		848	0.0213804		322	0.00852548		95	0.0329295		9	0.057587
468	0.00774024		216	0.0075775		817	0.00654917		184	0.0213683		370	0.00851213		939	0.032598		461	0.0574621
341	0.0077158		59	0.00753632		385	0.00648502		174	0.0213279		703	0.00850235		919	0.0322174		423	0.0572944
79	0.0077125		381	0.00745596		112	0.00648392		590	0.0212178		720	0.00837786		936	0.032033		609	0.0570351
203	0.007703		58	0.00739218		133	0.00646982		994	0.0211747		85	0.0083223		5	0.0319436		424	0.0569574
433	0.00768224		656	0.00737041		720	0.00645852		479	0.0208952		433	0.0082739		60	0.0318216		425	0.0568756
43	0.00764896		612	0.00735495		958	0.00642279		705	0.0208447		767	0.00822021		199	0.0317657		426	0.0567695
769	0.00759781		120	0.00732327		733	0.00634071		512	0.0208079		893	0.0082119		946	0.0315357		427	0.0566399
442	0.00757841		654	0.0071461		767	0.00626672		232	0.020803		45	0.00820549		91	0.031458		610	0.0565815
883	0.00755175		67	0.00711676		461	0.00624121		694	0.0207435		53	0.00820456		193	0.0314272		428	0.0565535
795	0.00754066		549	0.0069777		938	0.00622803		357	0.0206857		188	0.00817701		717	0.0312969		429	0.0564926
112	0.00738723		99	0.00695813		396	0.00622443		924	0.0206703		294	0.00816546		37	0.031036		611	0.0564775
385	0.00727155		455	0.00685447		76	0.0062042		237	0.0206342		698	0.00815321		562	0.0307857		462	0.0563258
833	0.00725809		366	0.00668291		814	0.00618837		736	0.0205548		563	0.00812787		119	0.0299125		463	0.0558681
542	0.0072095		520	0.00666764		1002	0.0061574		611	0.0205548		43	0.00808836		49	0.0299101		430	0.0557375
938	0.00720451		522	0.00665736		718	0.00615421		416	0.0205327		1016	0.008034		196	0.0297676		464	0.0557039
41	0.00720234		621	0.00661302		116	0.00614892		285	0.0205173		491	0.00799064		948	0.029718		431	0.0556047
232	0.00718446		21	0.00651373		52	0.00612962		893	0.0204037		63	0.00796406		392	0.029604		432	0.0555
986	0.00717796		606	0.00646486		224	0.0060579		1157	0.0203821		307	0.00796383		59	0.0293972		433	0.0554867
161	0.00711828		248	0.00644472		548	0.00603827		601	0.0203658		232	0.00794457		106	0.0293579		10	0.0553572
1	0.00711652		285	0.0064371		114	0.0060331		603	0.0203474		248	0.00794153		555	0.0292381		465	0.0552639
379	0.00700835		223	0.00634444		1001	0.00603125		704	0.0201728		186	0.0078733		556	0.0292101		612	0.0551601
958	0.00699052		261	0.00629275		190	0.00600301		105	0.0201706		215	0.00783605		880	0.0292025		434	0.0549867
361	0.00698007		3	0.00626319		912	0.00598408		238	0.0200596		266	0.00783415		406	0.0292017		466	0.0548273
979	0.00694061		345	0.00612738		496	0.00597888		805	0.0200382		816	0.00782327		422	0.0290159		467	0.0545723
898	0.00689402		506	0.0061193		213	0.00594365		892	0.0198726		114	0.00776748		568	0.0289815		435	0.0545649
854	0.00686909		394	0.00594848		904	0.00588549		1123	0.0198469		938	0.00775401		6	0.0289591		436	0.0544997
465	0.00680759		521	0.00591981		100	0.00583665		784	0.0198078		19	0.00773379		715	0.0289381		11	0.0544903
664	0.00679953		228	0.00591176		123	0.00583083		957	0.0198077		324	0.00766236		209	0.0286559		437	0.0543968
259	0.00678549		142	0.00590227		819	0.00581006		1059	0.0197686		382	0.00759865		515	0.0285399		12	0.0543398
214	0.00675859		353	0.00576287		893	0.00578298		623	0.0197651		524	0.00752592		2	0.0285217		468	0.0541896
676	0.00675013		16	0.0057596		174	0.00575518		395	0.0197417		847	0.00749327		929	0.0284812		438	0.0541
754	0.00669911		469	0.00568769		188	0.00574875		71	0.0197375		395	0.00740628		438	0.0283625		469	0.0540733
736	0.00667484		106	0.00552936		356	0.0057423		610	0.0197085		140	0.00735243		988	0.0280696		13	0.0540506
174	0.00665505		452	0.00539864		476	0.00573784		974	0.0197055		958	0.00733815		420	0.0280486		613	0.0540149
961	0.00664381		102	0.00537912		852	0.00572891		363	0.0196642		203	0.00733083		113	0.0279749		439	0.053942
563	0.00663886		128	0.0053776		280	0.00572563		263	0.0196579		80	0.00728605		412	0.0275098		440	0.0539316
801	0.00662887		542	0.0053736		688	0.00567123		602	0.0196241		476	0.00723037		371	0.0274373		614	0.0536205
662	0.00661322		283	0.00532531		400	0.00567027		912	0.0193839		1002	0.00722632		42	0.0270948		441	0.0534644
219	0.0065986		668	0.0051805		121	0.00562491		552	0.0193512		424	0.00720928		453	0.0270442		442	0.0533236
340	0.00656897		558	0.00510727		807	0.00561616		1176	0.019322		496	0.00713941		195	0.0267742		443	0.0533014
503	0.00653949		476	0.00507076		722	0.00560031		1031	0.0189796		705	0.00711657		962	0.0266443		444	0.0531348
414	0.00650995		278	0.00501388		987	0.00560017		1245	0.0189598		297	0.00710296		956	0.0264346		445	0.0528686
609	0.00648019		486	0.00492915		407	0.00559521		825	0.0189499		196	0.00707419		58	0.0264291		446	0.0527894
215	0.00646546		73	0.00492655		685	0.00558106		735	0.0189194		282	0.00706555		934	0.0260711		447	0.0527574
837	0.00643282		135	0.00492117		1011	0.00557386		1097	0.0188969		343	0.00705349		954	0.0251206		448	0.0526696
72	0.00642379		628	0.00489208		45	0.00546596		807	0.0188174		822	0.00701435		926	0.024529		14	0.0525643
19	0.00641605		100	0.00474096		313	0.00545852		535	0.0187378		126	0.00700244		45	0.0241924		449	0.0525304
840	0.00638402		313	0.00467666		736	0.00543523		701	0.0186219		335	0.00700239		905	0.0239876		450	0.0524399
446	0.00637357		480	0.00463682		995	0.00543418		53	0.0185932		614	0.00697015		712	0.0231187		615	0.0524178
38	0.00629316		372	0.00460536		276	0.00542668		410	0.0185737		970	0.00696692		706	0.022937		470	0.0522701
569	0.00628811		545	0.00458915		335	0.00537797		312	0.0185116		987	0.00693627		38	0.022884		15	0.0517003
825	0.00625358		119	0.00450973		309	0.0053684		106	0.0183958		280	0.00692362		992	0.0228085		16	0.0510677
688	0.00620095		31	0.00446586		983	0.00535146		814	0.0183519		96	0.00686261		534	0.0227593		471	0.0509113
766	0.00619141		675	0.00444836		658	0.00533193		73	0.0182694		625	0.00686121		433	0.0227508		472	0.0506311
524	0.00618054		478	0.00443082		74	0.00527298		89	0.018236		329	0.00679232		405	0.0225801		616	0.0504616
614	0.00616604		10	0.0043104		506	0.00525862		488	0.0182139		38	0.00678278		700	0.022568		17	0.0500944
140	0.00613343		129	0.00425062		498	0.00525812		62	0.0181172		333	0.0067569		461	0.0224383		473	0.050062
186	0.00613089		535	0.00424307		700	0.0052572		420	0.0178685		1008	0.00675399		908	0.0223987		474	0.0496975
494	0.00610504		396	0.00424288		952	0.00522794		483	0.0178103		41	0.00672326		918	0.0223614		18	0.0496538
424	0.00608496		9	0.00419871		250	0.00522774		67	0.0177995		446	0.00670213		44	0.0222871		19	0.0495877
814	0.00607451		514	0.00414144		53	0.00520619		104	0.0177503		435	0.00668585		52	0.0218292		475	0.049377
834	0.00607103		454	0.00408729		382	0.00520548		40	0.0176665		268	0.00666013		938	0.0217885		20	0.0493526
63	0.0060605		369	0.00407882		96	0.00518486		785	0.0176517		554	0.00664061		53	0.021666		617	0.049089
952	0.00604886		472	0.00404197		333	0.00518151		854	0.01751		276	0.00664024		410	0.0215275		618	0.0489588
810	0.0060162		682	0.00397585		847	0.0051712		646	0.0174798		330	0.00658893		952	0.0215093		619	0.0487244
335	0.00600202		109	0.00392076		771	0.0051703		23	0.017456		130	0.00656226		550	0.0214995		476	0.048698
554	0.00599028		393	0.00387595		619	0.00511266		424	0.0172347		995	0.00656174		393	0.0213834		620	0.0486683
180	0.00596375		234	0.00383086		1000	0.00510499		1081	0.0172146		72	0.00648706		897	0.0213368		477	0.0485299
354	0.00595338		107	0.00381412		424	0.00509739		300	0.0171648		94	0.0063798		1	0.0212071		478	0.0484394
53	0.00592645		552	0.00380322		300	0.00509018		862	0.0169933		31	0.00637761		442	0.0211841		21	0.0478735
1019	0.00590671		339	0.00379394		530	0.00505039		913	0.0169821		37	0.0063601		478	0.0210288		479	0.0477758
491	0.00588107		163	0.00376093		43	0.00503698		1259	0.0168559		506	0.00631914		394	0.020747		621	0.0474213
1002	0.00587096		140	0.00373514		124	0.00503086		478	0.0167373		909	0.00630141		512	0.0207342		480	0.0473987
100	0.00581368		492	0.00371851		621	0.00500394		961	0.0167197		481	0.00628214		387	0.0206354		481	0.0469872
931	0.00580122		411	0.00348964		94	0.00494878		1051	0.0166706		498	0.00628023		906	0.0206092		22	0.0469225
899	0.00575747		609	0.00348937		330	0.00493773		577	0.0166682		854	0.00624255		482	0.0205593		622	0.0467438
266	0.00569049		449	0.00347492		433	0.00493195		96	0.0166554		801	0.00622303		911	0.0202023		482	0.0467026
651	0.00567006		475	0.00347477		267	0.00486077		344	0.0166395		621	0.00613527		877	0.0200946		623	0.0464267
970	0.00564523		297	0.00346622		352	0.00483149		783	0.0166079		688	0.00600175		43	0.0200285		483	0.0464002
722	0.00556568		543	0.00346456		614	0.00480033		873	0.0164925		465	0.00599017		892	0.0197854		484	0.0463256
297	0.00554016		202	0.00341232		726	0.00479476		790	0.0164146		978	0.00596932		55	0.0194017		23	0.0460507
85	0.00553131		214	0.00339483		355	0.00476551		606	0.0163035		219	0.00596888		949	0.0193734		485	0.0460106
900	0.00548548		477	0.00335472		544	0.00476549		1002	0.0162954		414	0.00596494		446	0.0190092		624	0.0459803
199	0.00546188		312	0.00334536		203	0.00475998		919	0.0162913		1	0.00591824		191	0.018683		625	0.0458933
235	0.00541622		604	0.00326063		232	0.0047477		800	0.0161629		899	0.00588227		886	0.0184934		486	0.0457763
502	0.00540389		141	0.00321731		141	0.00474065		1227	0.0160321		832	0.00587371		48	0.0183558		626	0.0457671
13	0.00537511		220	0.00308711		268	0.00473333		916	0.0158751		885	0.00580293		41	0.0183373		627	0.0453356
839	0.00536556		516	0.00294579		640	0.00471366		1105	0.0158743		834	0.00579575		375	0.0178525		24	0.0453047
312	0.00535212		260	0.00293663		290	0.00470445		74	0.0157856		718	0.00579013		435	0.0175664		25	0.0450031
701	0.0052946		360	0.00293373		468	0.00465089		1053	0.0157772		952	0.00576141		424	0.0174654		26	0.0449393
971	0.00529297		503	0.00285081		805	0.00464837		656	0.0157588		852	0.00573275		511	0.0174116		628	0.0445329
80	0.00521669		105	0.00278239		180	0.00464777		514	0.0157566		453	0.00569033		50	0.0174006		27	0.0442083
126	0.00521014		52	0.00273398		41	0.00463403		319	0.0157446		112	0.00568336		882	0.0173905		28	0.0434995
16	0.00516085		272	0.0026945		553	0.00463231		762	0.0156948		511	0.0056827		570	0.0170797		629	0.0434201
52	0.00510512		566	0.00267561		270	0.00460004		110	0.0156718		734	0.00561931		563	0.0170722		487	0.0432493
488	0.00508925		465	0.00265552		367	0.00459666		1241	0.0155292		442	0.00561513		930	0.0170617		488	0.0432205
680	0.00506617		125	0.00264635		223	0.00456895		64	0.0155203		676	0.00561465		207	0.01688		489	0.0431646
45	0.00505262		450	0.002638		849	0.00456085		624	0.0154898		325	0.00560734		931	0.0165728		490	0.043128
73	0.00504983		145	0.00257192		703	0.00455018		107	0.0152725		117	0.00559663		459	0.0163991		491	0.0430369
44	0.00504907		78	0.00255595		395	0.00454004		560	0.0152349		73	0.00559323		391	0.0161298		492	0.0426079
734	0.00502814		388	0.00254821		283	0.00447554		111	0.015141		159	0.0055493		398	0.0160747		630	0.0424936
304	0.00500712		215	0.00254384		20	0.00446986		38	0.0151016		249	0.00552741		389	0.0159771		631	0.0422998
435	0.00499663		178	0.00253617		22	0.00444377		409	0.0150984		900	0.00552516		18	0.0159397		493	0.04226
29	0.0049939		168	0.00252317		414	0.00443067		153	0.0150971		488	0.00548759		382	0.015787		494	0.0422034
621	0.00495142		460	0.00248228		524	0.00441882		835	0.0150748		82	0.00548631		991	0.0156192		495	0.0420695
96	0.00492794		2	0.0024408		698	0.00436706		967	0.0150706		1019	0.00546951		996	0.0154871		496	0.0420025
765	0.00490007		201	0.00243506		38	0.0043461		1024	0.0150617		651	0.00545816		569	0.0153742		29	0.0419231
128	0.00485314		453	0.00242444		725	0.00431656		627	0.0150251		979	0.00543713		841	0.015301		497	0.0417557
978	0.00472844		185	0.00239606		775	0.00430567		1231	0.0149664		29	0.00543281		559	0.0152185		30	0.0416872
94	0.0046885		266	0.00239257		251	0.0042134		851	0.0147852		806	0.00541279		554	0.0152142		31	0.0415383
249	0.00466795		143	0.00238975		85	0.00416819		917	0.0147414		898	0.00537464		843	0.0151028		32	0.0415182
368	0.0046559		556	0.00234751		537	0.00415429		234	0.0146492		532	0.0053385		553	0.0150273		498	0.0413671
643	0.00459089		487	0.00231795		36	0.00413966		908	0.0145999		729	0.005334		917	0.0150174		632	0.0412639
281	0.0045778		192	0.00228533		823	0.00413801		169	0.0145997		658	0.00532259		874	0.0148315		499	0.0412493
498	0.00457433		511	0.00226095		793	0.00411632		359	0.0144976		290	0.00527183		842	0.0147453		500	0.0410521
713	0.0045315		150	0.00223834		615	0.00409608		382	0.014476		810	0.00526222		1003	0.0147453		33	0.0410472
193	0.00449123		415	0.00222957		287	0.00409463		282	0.0144473		827	0.00517225		845	0.0147182		633	0.0408026
1008	0.00441221		124	0.00219179		253	0.00409291		979	0.0142232		116	0.00516597		202	0.0146266		501	0.0405326
760	0.00437248		608	0.00218244		281	0.00408654		829	0.014184		1013	0.00513749		846	0.0143249		634	0.0405013
703	0.00435395		421	0.00218153		839	0.00408064		1039	0.0141795		25	0.00513279		404	0.0142694		34	0.0404986
471	0.00435304		640	0.0021741		705	0.00398282		438	0.0141035		680	0.00512475		486	0.0142458		635	0.0404055
570	0.0043166		213	0.00214746		598	0.00397314		734	0.0140475		643	0.00511146		951	0.0142312		502	0.0403749
532	0.00431618		568	0.0021336		481	0.00395206		430	0.0139866		837	0.00509408		401	0.0142196		35	0.0403581
210	0.00430621		346	0.0021083		963	0.00394217		666	0.0139353		615	0.00508263		885	0.0141512		503	0.0403551
981	0.00428309		510	0.00201567		358	0.00391821		879	0.0139203		44	0.00507807		46	0.0140915		636	0.0401728
504	0.00424906		466	0.00199615		928	0.00390411		294	0.0139133		866	0.00507037		847	0.0140732		504	0.0401633
82	0.0042094		509	0.0019667		254	0.0039007		597	0.013913		609	0.0050533		419	0.014064		637	0.0401544
42	0.00420583		563	0.00196165		315	0.00387373		227	0.0139073		966	0.00501038		848	0.0139563		638	0.0400451
982	0.00419643		134	0.00195975		80	0.00386362		353	0.013843		190	0.00496536		457	0.0139356		36	0.040017
280	0.00417471		508	0.00194955		859	0.00385639		51	0.0138343		235	0.00495225		850	0.0138783		639	0.0398735
963	0.00415209		136	0.00192231		348	0.00385488		768	0.0138333		281	0.00493861		856	0.0137817		505	0.0397008
244	0.00414942		72	0.0019105		196	0.00385321		668	0.0138078		1001	0.00493576		945	0.0137621		37	0.039586
276	0.00411181		462	0.00187546		446	0.00384523		1240	0.0137986		64	0.00487642		751	0.0136777		640	0.039571
87	0.00410633		361	0.00184538		19	0.0038448		760	0.0137897		765	0.00486254		933	0.0135172		506	0.0394627
658	0.00408933		265	0.00181127		37	0.00384127		404	0.0137588		202	0.00485955		854	0.0134103		641	0.0393214
25	0.00407867		410	0.00180404		1012	0.00377324		452	0.0137037		895	0.00485334		857	0.0133425		38	0.039272
793	0.00407044		162	0.00180185		794	0.00375061		542	0.0136635		494	0.00481973		942	0.0133206		39	0.039248
267	0.00406469		122	0.00178538		435	0.00373375		599	0.0136526		180	0.00478777		852	0.0133157		642	0.0392319
89	0.00406088		528	0.00177011		573	0.00369047		1250	0.0136453		149	0.00477697		870	0.0132946		643	0.0390567
794	0.00404246		489	0.00170278		502	0.00366622		501	0.0135368		128	0.00477418		458	0.0132919		507	0.0390294
949	0.00403878		456	0.00163033		248	0.00356046		60	0.0135218		619	0.00476999		558	0.0132825		508	0.0389876
170	0.00401594		459	0.0016208		202	0.00353124		471	0.0135118		16	0.00472863		844	0.0132687		509	0.038823
349	0.00399175		461	0.00160898		676	0.0035188		887	0.0133268		471	0.00469576		779	0.0132566		40	0.0384658
667	0.0039851		130	0.0015933		178	0.00348404		664	0.0132882		170	0.00469176		403	0.0132005		644	0.0384581
33	0.00398184		137	0.00153727		554	0.00344163		579	0.0132766		13	0.00469142		851	0.0130116		41	0.0384327
181	0.00392785		45	0.00153037		944	0.00342255		1068	0.0132539		971	0.00465763		753	0.0129677		510	0.0379749
49	0.00392748		647	0.00149995		651	0.00338634		860	0.0131483		195	0.00465367		548	0.0129022		42	0.0379685
64	0.00392732		19	0.00147755		900	0.00338344		274	0.0131312		570	0.00463856		368	0.0128833		43	0.0378994
290	0.00390067		318	0.00147581		570	0.00338222		812	0.0131253		1011	0.00461729		861	0.0128675		645	0.0378729
966	0.00388122		483	0.0014661		909	0.00336032		262	0.0130974		760	0.00459875		774	0.0128633		646	0.0378611
844	0.00387957		123	0.00141824		265	0.0033567		605	0.0130169		644	0.00459531		860	0.012797		647	0.0377467
184	0.00385807		269	0.00140581		442	0.00335143		1119	0.0130085		283	0.00447481		904	0.0127877		648	0.0377447
97	0.00381849		127	0.0013817		459	0.00334355		521	0.0129976		839	0.00446593		396	0.0127615		44	0.0376902
149	0.00377194		626	0.00136318		950	0.00334161		230	0.0129819		161	0.00443347		208	0.0127556		649	0.0376483
327	0.00375268		577	0.00135336		880	0.0033339		527	0.0128977		492	0.00442661		409	0.0126659		511	0.0375761
611	0.00373254		374	0.00133365		754	0.00331312		1113	0.0128764		375	0.00442566		869	0.0126249		45	0.0374389
343	0.003706		442	0.00132197		44	0.00327446		914	0.0127605		1000	0.00432234		491	0.0125758		512	0.0373935
117	0.00368663		36	0.00129028		642	0.0032143		1118	0.0127558		356	0.00431384		953	0.0125454		513	0.0373308
355	0.00367257		658	0.00125437		899	0.00321396		1056	0.0127481		89	0.00430414		432	0.0125244		514	0.0373143
806	0.00367145		118	0.00124277		307	0.00319813		243	0.0127177		981	0.00430312		455	0.0124961		515	0.0370881
364	0.00366597		557	0.00123028		895	0.00319353		765	0.0126681		244	0.0042959		463	0.0124953		516	0.0370182
619	0.00364294		657	0.00122834		504	0.00318562		982	0.012665		662	0.00428713		772	0.012436		517	0.0369818
615	0.00364036		60	0.00120496		825	0.00314441		955	0.0126597		242	0.00426775		862	0.0124327		518	0.0367304
866	0.00355505		131	0.00110253		969	0.00313846		759	0.0126075		578	0.00423412		773	0.0124098		46	0.0364864
807	0.00354379		80	0.00108859		40	0.00311475		690	0.0126055		949	0.00422695		971	0.0123343		519	0.0364073
178	0.00354314		147	0.00105194		170	0.00308317		652	0.012489		134	0.00422641		400	0.0122415		47	0.0363251
478	0.00350534		444	0.00102263		140	0.00304894		709	0.0124674		59	0.00421348		695	0.0121849		48	0.0363164
134	0.00348556		607	0.000938		211	0.00304		1258	0.0123608		502	0.00419951		390	0.0120933		520	0.0361159
1011	0.00341069		262	0.000938		667	0.00303526		347	0.0123461		931	0.00419848		853	0.0120879		49	0.0360725
578	0.00340777		560	0.000912		494	0.00302827		920	0.0121837		793	0.00414844		187	0.0120855		650	0.0360011
1000	0.00339335		156	0.000907		478	0.0029995		323	0.0120602		723	0.0041252		762	0.0120651		651	0.0359341
27	0.00335805		108	0.000896		302	0.00296238		487	0.0120153		42	0.00412088		758	0.0120453		50	0.035916
927	0.0033187		554	0.000878		885	0.00295503		217	0.0119997		358	0.00410828		855	0.0120411		652	0.0358602
878	0.00331097		463	0.000854		82	0.00294323		120	0.0119564		368	0.00408583		775	0.0120013		521	0.0358153
924	0.00329978		164	0.000847		460	0.00293386		593	0.0119462		831	0.00408229		770	0.0119545		653	0.0357251
196	0.00329652		570	0.000776		1009	0.00292077		99	0.0119247		287	0.00406188		3	0.0119519		51	0.0356438
745	0.00329032		309	0.000763		626	0.00290133		1040	0.0119125		986	0.00401476		859	0.011936		52	0.0356073
278	0.00328781		470	0.000755		949	0.00289124		235	0.0118757		33	0.00399103		858	0.0118344		522	0.0355926
881	0.00326159		314	0.000707		815	0.00287463		496	0.0118724		296	0.00396172		863	0.0118319		654	0.0355918
644	0.00324444		352	0.000674		931	0.00283934		831	0.0118246		726	0.00382162		777	0.0118149		53	0.0352999
771	0.00324011		17	0.00063		97	0.00283835		32	0.0116917		794	0.00381892		756	0.0118037		54	0.0352832
933	0.00322605		471	0.000623		723	0.00279704		698	0.011669		87	0.00380727		864	0.0117309		523	0.0352698
852	0.0032253		227	0.000616		217	0.0027587		954	0.0115447		982	0.00372174		360	0.011651		655	0.0352586
805	0.00320493		488	0.000614		858	0.00275733		1249	0.0114572		267	0.00371796		480	0.0116452		55	0.035194
972	0.00315783		332	0.000577		662	0.00274453		370	0.0114164		677	0.00371689		47	0.011635		656	0.0351813
492	0.00315683		507	0.000566		29	0.00271109		584	0.0113348		667	0.00370158		768	0.0115984		56	0.0351798
116	0.0031537		50	0.000561		16	0.00269947		1165	0.011133		514	0.00366665		849	0.0114822		524	0.0350392
292	0.00314906		652	0.000501		657	0.00269551		314	0.0110502		97	0.00366428		376	0.0114206		657	0.0350201
467	0.00314809		144	0.000473		269	0.00268106		490	0.010983		722	0.00364287		776	0.0114157		57	0.0348836
689	0.00312948		212	0.000454		488	0.00266858		155	0.0109645		882	0.00357295		780	0.0114125		658	0.0348332
190	0.00312157		264	0.000434		1015	0.00266789		985	0.0109446		304	0.00355233		7	0.011372		659	0.0348163
124	0.00307899		199	0.000406		715	0.0026674		808	0.0108944		701	0.00351641		754	0.0113502		525	0.0347588
950	0.00307879		446	0.000402		874	0.00265612		615	0.0108662		878	0.003491		771	0.0113405		660	0.0347458
705	0.0030666		402	0.000397		789	0.00264789		172	0.0107931		292	0.00346654		430	0.0113175		58	0.0346894
1013	0.00305096		113	0.000361		72	0.00264238		922	0.0106508		637	0.00345909		760	0.0113087		661	0.0346147
123	0.00304561		358	0.000326		13	0.0026338		1082	0.0106158		1009	0.00344656		766	0.0111696		526	0.0345739
951	0.00301354		499	0.000324		306	0.00262299		168	0.0105856		771	0.00340718		331	0.0111669		59	0.0344194
461	0.00295687		217	0.00032		532	0.00261197		1171	0.0104512		728	0.00334931		767	0.0111245		60	0.0344175
31	0.00295626		66	0.000287		765	0.00258993		530	0.0102642		278	0.00333961		423	0.0111208		527	0.0341547
59	0.0029545		395	0.000283		187	0.00255589		1120	0.0101966		178	0.00333018		912	0.0110678		528	0.0340939
980	0.00294011		110	0.000261		278	0.00254397		56	0.0101244		892	0.00332947		1007	0.011064		662	0.0340865
456	0.00291963		103	0.000228		514	0.00252249		754	0.0100855		456	0.00330146		761	0.011053		663	0.0340517
677	0.00290752		655	0.000227		161	0.00250755		818	0.00998391		713	0.00328329		407	0.0110436		664	0.0339766
14	0.00289355		445	0.000226		25	0.00250585		855	0.00994768		107	0.00326102		866	0.0110141		61	0.0339606
729	0.00285224		403	0.00022		978	0.00248359		301	0.00992111		999	0.0031988		755	0.0109002		529	0.0338862
1001	0.00277211		464	0.000216		67	0.00247999		867	0.00979232		849	0.00319668		765	0.0108545		530	0.0338255
719	0.00270338		116	0.000201		292	0.0024639		1223	0.00976858		121	0.00313953		752	0.0107931		531	0.0338215
945	0.00269181		171	0.000199		851	0.00245741		324	0.00973521		555	0.00313874		759	0.0107712		62	0.033787
287	0.00268961		167	0.000187		73	0.00241595		559	0.00971521		715	0.00313354		565	0.0107409		63	0.033776
265	0.00267639		304	0.000149		986	0.00241575		683	0.00970907		478	0.00313013		388	0.0106718		64	0.0337456
242	0.00266494		117	0.000145		689	0.00241256		1122	0.00965317		123	0.00311268		763	0.0105562		532	0.0337291
121	0.00265769		166	0.000129		837	0.00236148		124	0.00961596		950	0.00308922		895	0.0105295		65	0.0337284
895	0.00265085		115	0.000123		562	0.00233367		923	0.00960352		451	0.0030684		764	0.0104779		665	0.0336828
808	0.00263939		101	0.000109		970	0.00232235		793	0.00960344		927	0.00306388		769	0.0104715		666	0.0335158
999	0.00262135		65	9.47e-05		645	0.00227931		1009	0.00956713		355	0.00304589		955	0.0104096		667	0.0334571
598	0.00261293		605	8e-05		1006	0.00227657		356	0.00954851		881	0.00304375		462	0.0103647		668	0.0334539
1009	0.00260494		409	7.17e-05		156	0.00227259		681	0.00954633		167	0.00300563		427	0.0103544		669	0.0332406
829	0.00258413		359	7.15e-05		776	0.00224847		388	0.00954079		1012	0.00300421		867	0.0103427		66	0.0332162
723	0.00258278		451	6.44e-05		713	0.00224585		163	0.00943251		712	0.00299968		373	0.0103345		670	0.0332155
270	0.00256908		15	5.49e-05		694	0.00223239		613	0.00941612		504	0.00298929		190	0.0102463		67	0.0332049
672	0.00253433		18	5.29e-05		979	0.00222026		513	0.0094048		725	0.00297186		963	0.0102141		533	0.0330831
709	0.00252856		467	4.99e-05		734	0.00221219		556	0.00932568		945	0.00294536		691	0.0101747		68	0.0330284
838	0.00252811		146	4.9e-05		277	0.00217895		451	0.00925		303	0.00293267		878	0.0101729		69	0.0330101
885	0.00252277		484	3.45e-05		415	0.00217035		1107	0.00924655		467	0.00292075		535	0.0101644		671	0.0329993
107	0.00252107		400	2.33e-05		712	0.00215463		245	0.00910251		598	0.00291155		350	0.0101209		70	0.0328371
390	0.00251943		479	1.99e-05		134	0.00212918		687	0.0090549		270	0.00289985		757	0.0101124		672	0.0327885
283	0.00251734		458	1.33e-05		492	0.00212511		287	0.00902614		583	0.00285553		359	0.0100996		673	0.0327271
37	0.00247928		490	4.61e-06		580	0.0021237		948	0.00902281		851	0.00284974		865	0.0100415		71	0.0327271
319	0.00247785		661	4.27e-06		953	0.00211751		583	0.00895136		352	0.00283295		434	0.0100411		72	0.0326994
389	0.00245913		408	3.98e-06		107	0.00211185		1034	0.00889488		807	0.0028241		469	0.0100018		534	0.0326177
775	0.00238499		423	3.52e-06		195	0.00207103		944	0.00881299		611	0.0028151		51	0.00997336		535	0.0325971
728	0.00238496		473	2.39e-06		672	0.00205786		739	0.00874974		162	0.00280266		379	0.00973636		73	0.0325152
628	0.00238423		362	1.39e-06		892	0.0020562		865	0.00874576		265	0.00278868		346	0.00969002		536	0.0325147
300	0.00237497		559	1.31e-06		942	0.0020369		1055	0.00869297		844	0.00273036		184	0.00968157		674	0.0324247
851	0.00237417		133	4.86e-07		375	0.00202851		1248	0.00867394		327	0.00271076		395	0.00964883		74	0.0322737
475	0.00235871		493	2.39e-07		999	0.00201871		993	0.00865972		27	0.00270159		474	0.00960871		675	0.0322597
514	0.00234964		633	1.13e-07		760	0.00201152		804	0.00861165		700	0.00269069		358	0.0095792		75	0.0321902
277	0.00232911					261	0.00200706		115	0.00859585		277	0.00268517		521	0.009561		676	0.032124
634	0.00230786					811	0.00200364		167	0.00857313		348	0.00265831		868	0.00953597		537	0.0321098
375	0.00230411					368	0.00199534		619	0.0085659		520	0.0026563		692	0.00950203		76	0.0319093
195	0.0023028					680	0.001991		379	0.0085267		103	0.00264889		693	0.00950122		677	0.0318631
1012	0.00226841					162	0.0019843		761	0.00851087		124	0.00262457		431	0.00940625		77	0.0318486
942	0.002256					316	0.00196986		135	0.00848494		755	0.00260089		547	0.00939625		678	0.0317236
637	0.00222829					465	0.00196438		1182	0.00848399		230	0.00257663		560	0.0093657		679	0.0316594
791	0.00221721					966	0.00194611		915	0.00845536		300	0.00256217		332	0.00936477		78	0.0315926
261	0.00220935					128	0.00190098		1160	0.00844847		886	0.00253026		243	0.00935202		538	0.03155
12	0.00220172					951	0.00189494		1185	0.00843835		312	0.00252454		356	0.00928265		79	0.0315397
348	0.002175					677	0.00189041		482	0.00843729		14	0.00252326		263	0.00922658		539	0.031526
321	0.00216496					249	0.00188585		876	0.00840692		562	0.00246352		416	0.00921189		80	0.0314805
367	0.00212441					945	0.00187766		797	0.00835902		944	0.00246068		8	0.00920478		680	0.0314631
333	0.00210365					103	0.00187095		233	0.00834757		108	0.00242007		347	0.00916323		540	0.0314125
944	0.00207835					620	0.00186079		1102	0.00824254		933	0.00241403		357	0.00912141		541	0.0313562
973	0.00207305					471	0.00181879		931	0.00814631		819	0.00238357		537	0.00911314		81	0.0311991
269	0.00206428					109	0.00179087		423	0.00806864		432	0.0023725		439	0.00908217		681	0.0311969
914	0.00205977					812	0.001789		631	0.00800945		634	0.00235404		353	0.00899958		542	0.0311866
167	0.00204006					167	0.00174176		307	0.00799562		805	0.0023467		354	0.00896833		682	0.031108
953	0.00203601					732	0.00170756		903	0.00799219		951	0.00234575		998	0.00896606		82	0.0310951
356	0.00196954					735	0.00170466		1117	0.00796638		740	0.00233747		940	0.00895901		83	0.0310405
550	0.00196238					160	0.00166221		607	0.00795747		775	0.0023209		334	0.00889093		683	0.0309781
831	0.00196162					578	0.001662		859	0.00792438		210	0.00231049		997	0.00885403		684	0.0308973
583	0.00194795					7	0.00165967		1070	0.00790578		672	0.00227717		336	0.00882561		543	0.0308871
216	0.00193079					538	0.00165777		473	0.00789037		367	0.0022611		355	0.00881851		544	0.0308664
177	0.00191709					329	0.00165588		777	0.00785896		953	0.00224698		909	0.00881784		545	0.0308615
726	0.00191536					644	0.00165004		651	0.00783555		980	0.00224214		344	0.0087922		685	0.0308057
432	0.00189338					933	0.00163356		440	0.00776408		942	0.00220881		246	0.00875185		546	0.0307833
622	0.0018882					89	0.0016324		387	0.00774913		657	0.0021914		778	0.00873101		547	0.0307668
789	0.00187374					42	0.00163217		1184	0.00758031		924	0.0021882		335	0.00872507		548	0.0307204
824	0.0018079					643	0.00162588		220	0.00745792		389	0.00214964		470	0.0087048		549	0.0307062
423	0.00177669					169	0.00161872		170	0.00741747		689	0.00212755		421	0.00870434		686	0.0306197
40	0.00176834					701	0.00160798		1178	0.00739266		719	0.00212463		993	0.00869599		687	0.0305823
725	0.00176487					555	0.00159794		389	0.0073214		1015	0.00211538		262	0.00863497		84	0.0305147
430	0.00175604					298	0.00158741		434	0.00731384		537	0.00208965		342	0.00858376		688	0.0305111
36	0.00173872					724	0.00152936		1235	0.00730522		12	0.00206166		449	0.00857744		550	0.0304784
90	0.00171314					230	0.00152735		904	0.0072733		390	0.00205721		338	0.00857596		689	0.0304604
237	0.00169404					728	0.00152249		622	0.00727223		963	0.00203418		260	0.00851621		551	0.0303882
427	0.00168545					305	0.00151207		200	0.00725994		176	0.00202418		241	0.00848264		552	0.0303411
657	0.00167079					320	0.00144807		644	0.00724197		36	0.00201888		10	0.00845908		690	0.0303136
665	0.00166973					14	0.00144284		1052	0.00720937		1006	0.00201715		349	0.00844794		691	0.0303083
382	0.00166232					981	0.00143354		549	0.00716798		461	0.00201611		264	0.00842404		85	0.0303013
700	0.00166084					630	0.00140628		93	0.00713891		628	0.00201583		258	0.00829064		86	0.0302492
1015	0.00164299					740	0.00140355		433	0.00704762		928	0.00200257		372	0.00827235		692	0.0302388
451	0.0016298					627	0.00139746		194	0.00701072		702	0.0019997		881	0.00825091		693	0.0301222
345	0.00160638					149	0.00139563		691	0.00695937		321	0.00199796		348	0.0082415		694	0.0300364
1006	0.00157913					1010	0.00137964		11	0.00693843		314	0.00198765		248	0.00819945		695	0.0299993
928	0.00157848					844	0.0013553		219	0.0069262		626	0.00194683		333	0.00819678		87	0.029928
811	0.00153597					3	0.00135353		250	0.00690928		752	0.00192388		444	0.00819359		696	0.029863
209	0.00150513					611	0.00134646		555	0.00685795		1010	0.00191569		251	0.00815192		88	0.0298579
882	0.00149413					285	0.0013462		733	0.00685247		973	0.00190681		969	0.008141		89	0.0298302
509	0.00148555					520	0.00134341		75	0.00683395		808	0.00188578		250	0.00813443		697	0.0298207
359	0.0014661					791	0.00134247		1050	0.00682456		90	0.00184219		252	0.00813074		698	0.0297959
211	0.0014511					878	0.00133641		199	0.00681483		142	0.00183427		450	0.00806627		699	0.0297781
257	0.00144525					450	0.0013149		337	0.00678911		573	0.0018231		414	0.00797677		553	0.0297098
397	0.0014409					490	0.00131243		1019	0.0067429		501	0.00181203		343	0.00797478		90	0.0296083
417	0.00143912					501	0.00130394		299	0.00670668		791	0.00180167		443	0.00796639		554	0.0295587
755	0.00142984					34	0.00130119		1143	0.0066878		799	0.00176139		181	0.00794953		700	0.029479
788	0.00142978					526	0.00129791		283	0.00664882		40	0.00174981		261	0.00785591		555	0.0294621
156	0.00141801					509	0.00129249		148	0.00649808		859	0.00171832		352	0.00785088		701	0.0294542
868	0.00140998					826	0.00125806		875	0.00647129		269	0.0016862		266	0.00784474		556	0.0294082
985	0.00140569					763	0.00124851		939	0.00632886		840	0.00167225		4	0.00784267		702	0.0293485
501	0.00139615					833	0.00122449		667	0.00632335		171	0.0016638		249	0.00780857		91	0.0293316
555	0.00138878					622	0.0012211		564	0.00632143		788	0.00162357		254	0.00778024		557	0.0293302
520	0.00137664					800	0.00120469		1196	0.00631912		127	0.00161132		242	0.00769346		703	0.029302
537	0.00136273					176	0.00116824		799	0.00631385		156	0.00158502		341	0.00765394		558	0.0292752
160	0.0013455					881	0.00115024		182	0.00621906		318	0.0015773		456	0.00764727		92	0.0292296
556	0.00131206					323	0.00114467		1054	0.00621399		509	0.00156658		265	0.00760945		704	0.029215
132	0.00131111					507	0.00113185		320	0.006208		217	0.00155038		340	0.00755373		705	0.0291408
296	0.00130873					59	0.00112511		132	0.00606251		681	0.00151725		259	0.00753852		706	0.0291047
620	0.00129071					824	0.00111863		1208	0.0060241		415	0.00151064		267	0.00750778		93	0.029036
169	0.00128514					451	0.00110951		726	0.00593286		211	0.00148701		244	0.00742205		94	0.0289418
969	0.00128385					719	0.00110189		192	0.00589351		675	0.0014865		475	0.0074181		95	0.0288375
740	0.00128218					87	0.00107972		1112	0.00587847		815	0.00148256		385	0.00741047		559	0.0288246
573	0.00127248					675	0.00107506		609	0.00587319		820	0.00147744		337	0.00737021		96	0.0287763
15	0.00126632					484	0.0010429		906	0.0058653		789	0.00147204		351	0.00730701		97	0.0286904
7	0.00126261					108	0.00103347		505	0.00583831		475	0.00144778		899	0.00723082		98	0.0286061
799	0.00126193					750	0.00103088		881	0.0057923		620	0.00144522		959	0.0072301		560	0.0285704
925	0.00125997					148	0.00102517		1156	0.00575801		359	0.00142729		257	0.00721959		99	0.0285203
761	0.0012491					957	0.00101502		782	0.00573763		972	0.00140593		247	0.00720028		561	0.0285195
142	0.00121244					244	0.00101299		942	0.00567835		273	0.00140473		883	0.00719083		100	0.0285119
109	0.00120833					855	0.00100699		827	0.00567616		430	0.00137765		528	0.00714148		562	0.0284632
508	0.00119879					242	0.000987		1169	0.00554942		730	0.00137083		269	0.00701968		101	0.0284219
108	0.00117872					777	0.000983		497	0.00553455		261	0.00136753		245	0.00700793		707	0.0283804
608	0.00117398					597	0.000983		419	0.00545533		75	0.0013502		345	0.00698418		563	0.0283553
103	0.00116801					628	0.00098		635	0.00535789		345	0.00133895		451	0.00698346		564	0.0282707
230	0.00114679					799	0.000967		971	0.00535558		417	0.00132844		256	0.00697007		565	0.0282017
747	0.00112863					222	0.000955		318	0.00533643		507	0.00131173		445	0.00695592		102	0.0281925
358	0.00110246					940	0.000945		1239	0.00531972		556	0.00130936		964	0.00691587		708	0.0281544
3	0.0010912					633	0.000935		1179	0.00531017		608	0.00128396		467	0.00686724		566	0.0279895
415	0.0010897					458	0.000924		297	0.00526461		208	0.00127946		428	0.00680307		103	0.027883
626	0.00108857					207	0.000919		1229	0.00525758		811	0.00127601		339	0.00672976		567	0.027855
819	0.00108632					982	0.000918		498	0.00525635		513	0.00126248		270	0.00665935		568	0.0278525
507	0.00108391					882	0.000908		49	0.00524747		93	0.00125112		255	0.0066593		104	0.02782
75	0.00107652					886	0.000882		390	0.0052432		388	0.00122816		383	0.00651709		569	0.027739
402	0.00107605					172	0.000872		1017	0.00520782		402	0.00119949		447	0.00649967		570	0.0277115
955	0.00107552					637	0.000869		1030	0.0051753		523	0.00118648		544	0.00647305		571	0.0276351
683	0.00105132					877	0.000858		1126	0.00516303		586	0.00117995		253	0.00646889		572	0.0275212
694	0.0010492					617	0.000857		604	0.00514314		665	0.00117478		1000	0.00644407		105	0.0274733
187	0.00104841					317	0.000852		731	0.00508192		940	0.00116656		483	0.00644188		709	0.0274582
352	0.00103472					12	0.000838		1058	0.00504721		60	0.00114786		1014	0.00630261		710	0.0274551
162	0.00103361					432	0.000824		858	0.00501208		518	0.00113252		900	0.00626725		106	0.0274509
800	0.00102403					417	0.00082		673	0.0049409		160	0.00112708		1020	0.00596256		107	0.02742
826	0.00101873					456	0.00081		1103	0.00490752		550	0.001113		186	0.00589888		573	0.0273966
977	0.00101823					927	0.000796		325	0.00490352		257	0.00111004		561	0.00581999		574	0.0273693
907	0.00100572					1017	0.000796		641	0.00477328		640	0.00109317		526	0.00579423		575	0.0272557
421	0.001					273	0.000787		863	0.00475907		880	0.00108619		1001	0.00566386		576	0.027244
940	0.000961					924	0.000771		1257	0.00475655		957	0.00106139		268	0.00562181		577	0.0272408
540	0.000943					834	0.00077		100	0.00474817		750	0.00104392		1009	0.00555701		711	0.0270753
175	0.000939					955	0.000769		1175	0.0047478		427	0.00103879		441	0.00550926		108	0.0270253
308	0.000936					687	0.000766		321	0.00468514		592	0.0010314		471	0.00533084		578	0.026996
681	0.00093					665	0.000764		798	0.0046811		984	0.00101953		509	0.00531426		579	0.0269803
60	0.000905					310	0.000757		1063	0.00467645		622	0.0010164		489	0.00526721		109	0.0269755
586	0.0009					359	0.000752		1189	0.00467088		285	0.00101187		889	0.00513973		110	0.0269548
730	0.000898					968	0.000727		213	0.00466227		955	0.00100833		557	0.00510954		111	0.0269201
627	0.000895					463	0.000721		943	0.00462082		874	0.000982		381	0.00510778		112	0.0268503
158	0.000894					8	0.000717		713	0.00461199		724	0.00098		380	0.00508904		580	0.0268035
518	0.000893					118	0.000708		39	0.0046045		450	0.000954		893	0.00503466		113	0.0268015
171	0.000879					288	0.000707		612	0.00460099		169	0.00095		1016	0.00499322		712	0.0267993
301	0.00087					171	0.000696		929	0.00457833		738	0.000949		995	0.00495152		581	0.0267122
849	0.000852					467	0.000686		1187	0.00455903		187	0.000947		538	0.00488757		582	0.0266981
431	0.000845					583	0.000684		998	0.00452207		431	0.000946		968	0.00475524		583	0.0266981
247	0.000843					788	0.000684		394	0.00451054		337	0.000937		967	0.00473837		713	0.0266877
67	0.000842					99	0.000671		984	0.00449555		977	0.000931		440	0.00469957		114	0.0265521
217	0.000836					552	0.000641		561	0.00447221		423	0.000931		465	0.00463352		584	0.0264532
1010	0.000835					319	0.00064		46	0.00444014		829	0.000926		924	0.00452904		585	0.0264408
721	0.000824					745	0.000625		3	0.00444006		253	0.000919		525	0.00450725		586	0.0264183
523	0.000821					513	0.000624		372	0.00440809		220	0.00091		460	0.00446874		714	0.0264033
337	0.000814					27	0.000614		772	0.00440459		132	0.000909		24	0.00434243		587	0.0263776
462	0.000801					57	0.000603		339	0.00438491		749	0.000902		927	0.00433567		115	0.0263426
600	0.000794					634	0.000595		1206	0.00438387		309	0.000875		508	0.00408134		588	0.0263371
957	0.00079					157	0.000593		935	0.00432706		474	0.000873		468	0.00406632		715	0.0262839
147	0.000778					164	0.000593		813	0.00432404		538	0.000862		481	0.00397665		116	0.0262482
98	0.000775					867	0.000592		162	0.00431467		177	0.000857		989	0.00383558		117	0.0261793
645	0.000774					749	0.000586		921	0.00431213		109	0.000855		26	0.00372362		716	0.0261633
640	0.000774					827	0.000585		802	0.00430921		540	0.000853		56	0.0036353		118	0.0261606
675	0.000773					853	0.000579		598	0.00427974		600	0.000853		965	0.00350763		717	0.0260978
820	0.000765					93	0.00057		79	0.00420698		7	0.00085		808	0.00349867		119	0.0260654
155	0.000738					142	0.000562		775	0.00419534		965	0.000833		377	0.00333652		589	0.0260185
289	0.000731					345	0.000553		872	0.00416784		209	0.000832		30	0.00333064		590	0.0259754
245	0.000728					543	0.000535		492	0.00415817		288	0.000831		941	0.0032702		120	0.0259591
984	0.000709					964	0.00053		1110	0.00408239		800	0.000821		490	0.00324523		121	0.0259309
715	0.000703					679	0.00052		1242	0.00407742		67	0.00081		484	0.00317084		122	0.0259182
617	0.000695					759	0.000506		31	0.00407272		813	0.000803		914	0.00315121		718	0.0258579
630	0.000687					475	0.000504		103	0.00407113		310	0.000797		499	0.00311346		719	0.0258086
388	0.000686					808	0.000503		662	0.00406349		175	0.00079		15	0.00308929		591	0.0256469
225	0.000683					177	0.000496		543	0.00405785		306	0.000772		977	0.00299194		720	0.0256154
474	0.000672					840	0.00049		293	0.00404547		30	0.000743		11	0.0029778		592	0.0255012
757	0.000648					469	0.00049		738	0.00403218		858	0.000739		28	0.00289982		593	0.0254891
749	0.000644					88	0.000477		9	0.0039897		216	0.000737		789	0.00289898		721	0.0254615
495	0.000641					556	0.000475		1243	0.00398852		761	0.000722		522	0.00283959		722	0.0254259
168	0.000633					173	0.000471		472	0.00397838		221	0.000719		805	0.00268623		594	0.0254041
310	0.000631					980	0.000457		166	0.0039646		985	0.000717		533	0.00268472		123	0.0253932
886	0.000628					449	0.000453		113	0.00394956		237	0.000701		1010	0.00268366		124	0.0253919
399	0.000621					440	0.00044		1095	0.00392085		914	0.000701		497	0.0026298		125	0.0253309
434	0.000613					427	0.000413		1135	0.00391963		627	0.000661		506	0.00261681		126	0.0253137
668	0.000611					941	0.000407		37	0.00391492		495	0.000655		973	0.00261207		723	0.0252263
880	0.000592					339	0.000406		618	0.00391319		925	0.000655		799	0.00257112		724	0.0252218
513	0.000591					508	0.000399		880	0.00390548		493	0.000651		536	0.00251867		127	0.0252158
176	0.000588					822	0.000399		937	0.00389467		865	0.00065		417	0.00251496		595	0.0251823
303	0.000572					337	0.000394		576	0.00386133		757	0.000646		802	0.00251104		596	0.025144
30	0.000564					1004	0.000393		1236	0.00380524		732	0.000637		807	0.00249883		597	0.0250638
568	0.000533					592	0.000374		1186	0.00379426		645	0.000629		806	0.00246879		128	0.0250115
738	0.000523					255	0.00036		966	0.00378654		225	0.000621		54	0.00244438		129	0.0248345
484	0.000523					721	0.000359		146	0.00378114		245	0.000617		797	0.00242518		598	0.0247942
255	0.000519					755	0.000358		1007	0.00370768		969	0.000616		476	0.0024136		599	0.0247911
813	0.000518					28	0.000357		728	0.00370405		15	0.000613		397	0.00241091		600	0.0247729
127	0.000508					90	0.000356		309	0.00367416		256	0.000612		696	0.00239655		130	0.0247444
449	0.000506					462	0.000356		842	0.00363772		838	0.000592		378	0.00238253		725	0.0246993
459	0.000504					480	0.000351		177	0.00360574		3	0.000589		990	0.00237117		131	0.0246938
450	0.000497					127	0.000345		686	0.00357254		735	0.000582		1002	0.00236636		132	0.024536
165	0.000488					798	0.000329		229	0.00353725		694	0.000578		798	0.00229323		133	0.0244295
444	0.000478					499	0.000327		1132	0.00348352		439	0.000576		12	0.00227728		134	0.0241997
1018	0.00046					321	0.000323		628	0.00344175		308	0.000573		800	0.00225174		726	0.0241744
443	0.000456					702	0.000319		292	0.00342687		776	0.000566		925	0.00225004		727	0.0240368
538	0.000455					818	0.000317		24	0.00338602		642	0.000562		496	0.0022347		135	0.0239673
439	0.000454					4	0.000314		276	0.00338318		967	0.000538		984	0.00223381		136	0.0239462
253	0.000444					495	0.000312		520	0.00335101		687	0.000529		1019	0.00218121		137	0.0238791
964	0.000436					518	0.000305		272	0.0033376		683	0.000514		402	0.00208799		728	0.0237672
470	0.00043					582	0.000302		545	0.00333159		630	0.000505		788	0.00207424		729	0.0235954
580	0.000428					430	0.0003		211	0.00328976		449	0.000484		810	0.0020389		138	0.0235505
562	0.000427					115	0.0003		817	0.0032833		302	0.000481		531	0.00199758		730	0.0235377
797	0.000419					574	0.000299		1232	0.00322847		158	0.000477		801	0.00197449		139	0.0235145
613	0.000408					608	0.000298		839	0.00322242		147	0.000474		791	0.00194907		731	0.0235051
752	0.000404					780	0.000292		1049	0.00321661		444	0.000473		907	0.0019156		732	0.0235028
965	0.000398					500	0.000288		568	0.00321184		646	0.000469		517	0.00188648		140	0.0232897
646	0.000395					402	0.000287		654	0.00320453		168	0.000465		523	0.00186937		141	0.0232681
727	0.000395					257	0.000284		1190	0.00318424		747	0.000464		527	0.00185837		142	0.0232197
493	0.000393					165	0.000269		109	0.00317847		617	0.000449		972	0.0018563		143	0.0230576
592	0.000393					289	0.000267		719	0.00309995		298	0.000447		804	0.00184699		733	0.0230302
517	0.000378					318	0.000267		578	0.00309069		98	0.000441		529	0.0018447		734	0.0230076
874	0.000373					523	0.000264		1131	0.00307869		517	0.000431		887	0.00183668		144	0.0228936
387	0.000356					327	0.000261		665	0.00307497		58	0.00043		794	0.00182841		735	0.022887
1005	0.000343					897	0.000259		376	0.00306355		480	0.000428		718	0.00182509		736	0.0227104
582	0.000341					828	0.000254		990	0.00306317		247	0.000426		21	0.0017919		145	0.0227103
812	0.000333					328	0.000245		198	0.00305314		319	0.000422		793	0.00177027		146	0.0226889
490	0.000322					738	0.000245		129	0.00304322		172	0.000421		518	0.00176601		737	0.0226033
320	0.000319					747	0.000244		442	0.00303693		443	0.000419		888	0.0017641		147	0.0225399
328	0.000319					10	0.000242		696	0.0030206		387	0.000404		957	0.00174357		148	0.0224307
288	0.000316					279	0.000241		1145	0.00301911		580	0.000396		513	0.00168582		149	0.0224299
642	0.000316					75	0.00023		977	0.0030161		763	0.000394		782	0.00168461		150	0.0224024
499	0.000315					600	0.000228		83	0.00301382		697	0.000382		473	0.00168238		738	0.0223755
682	0.000305					525	0.000226		714	0.00297043		462	0.000378		1018	0.00167873		739	0.0222878
577	0.000305					457	0.000223		257	0.00296601		470	0.000376		500	0.00165505		740	0.0222399
858	0.000292					423	0.000217		1170	0.00295809		745	0.000375		466	0.00163515		741	0.0221517
305	0.000292					175	0.000216		737	0.00293042		613	0.000369		795	0.00162589		742	0.0221358
208	0.000284					540	0.000216		795	0.00291001		508	0.000365		503	0.00162		743	0.0221096
318	0.000282					730	0.000215		849	0.00287248		157	0.000349		566	0.00160105		744	0.0220691
447	0.000273					301	0.000212		1064	0.00286666		110	0.000341		448	0.0015931		745	0.0220173
485	0.000272					681	0.000211		745	0.00284364		459	0.000338		1008	0.00157931		746	0.0218098
309	0.000271					831	0.00021		672	0.00284247		1017	0.00033		786	0.00157907		747	0.0215572
4	0.000269					150	0.000207		796	0.00281387		455	0.000321		783	0.0015765		748	0.0215544
574	0.000269					120	0.0002		991	0.00280217		397	0.000319		781	0.00154588		749	0.0214542
10	0.000265					240	0.000199		255	0.00279418		118	0.000315		985	0.00149499		750	0.0214476
93	0.000264					239	0.000192		864	0.00279164		853	0.000307		966	0.00148324
115	0.000259					1005	0.000179		1111	0.00278585		727	0.000306		790	0.00147989
678	0.000256					218	0.000177		36	0.00277026		150	0.000295		182	0.00147831
99	0.000256					914	0.000177		965	0.0027655		339	0.000288		809	0.00146988
859	0.000254					820	0.000176		171	0.00275946		597	0.000285		477	0.00146517
522	0.000249					568	0.000172		1228	0.00273499		487	0.00028		784	0.0014424
68	0.000249					802	0.000171		962	0.00273185		68	0.000279		803	0.00144198
686	0.000248					295	0.00017		671	0.00272675		706	0.00027		994	0.0014338
445	0.00024					387	0.00017		45	0.0027136		289	0.000269		792	0.00140682
816	0.000238					152	0.000169		707	0.00270532		484	0.000269		787	0.00140401
697	0.000237					994	0.00016		822	0.00270177		421	0.000268		399	0.00139383
220	0.000237					686	0.000159		792	0.00269556		399	0.000267		540	0.00136074
750	0.000235					752	0.000156		828	0.00268869		434	0.000263		551	0.00135129
418	0.000227					208	0.000155		273	0.00265682		941	0.000261		505	0.00134513
690	0.000223					764	0.00015		463	0.00265516		135	0.000255		980	0.00131764
706	0.000214					567	0.000144		334	0.00265462		164	0.000247		796	0.00130286
994	0.000213					868	0.00014		298	0.00263381		115	0.000244		472	0.00128982
469	0.000211					158	0.000137		776	0.00259867		490	0.000244		494	0.00125004
567	0.000211					493	0.000132		253	0.00258891		618	0.000224		14	0.00123613
58	0.000206					98	0.000129		717	0.00257974		1018	0.000223		785	0.00121082
941	0.000204					865	0.000127		284	0.00254951		305	0.000221		978	0.00118592
351	0.000201					237	0.000126		72	0.00251215		34	0.000214		970	0.00112931
892	0.000197					314	0.00012		927	0.00250142		1005	0.00021		944	0.00111418
8	0.000197					907	0.000117		868	0.00247991		812	0.000199		1004	0.00110756
164	0.000192					15	0.000117		841	0.00247705		855	0.000196		17	0.00108996
273	0.00019					586	0.000115		158	0.0024359		868	0.000192		1011	0.00103334
222	0.000184					973	0.000109		130	0.00243461		1004	0.00019		502	0.00103063
687	0.000183					209	0.000108		1253	0.00243301		485	0.000187		488	0.000962
150	0.000176					585	0.000105		928	0.00243056		457	0.000185		520	0.000944
28	0.000168					30	0.000103		874	0.00241898		907	0.00018		539	0.000893
480	0.000166					829	0.000101		992	0.00241576		582	0.000179		1013	0.000866
990	0.000157					431	9.85e-05		224	0.00241137		818	0.00017		418	0.000836
597	0.000157					474	9.85e-05		1164	0.00240315		165	0.00017		981	0.000784
702	0.000156					444	9.48e-05		429	0.00235582		428	0.000169		23	0.000765
959	0.00015					455	9.44e-05		165	0.00235487		8	0.000165		27	0.000753
717	0.000146					351	9.39e-05		526	0.00233013		830	0.000162		487	0.000673
152	0.000145					985	8.8e-05		550	0.00232611		301	0.00016		279	0.00066
285	0.000145					168	8.73e-05		236	0.00230542		585	0.000146		504	0.000657
218	0.000134					618	8.68e-05		187	0.002297		577	0.000143		999	0.000615
487	0.000133					210	8.58e-05		226	0.00228789		240	0.000143		982	0.000613
172	0.000128					510	8.21e-05		968	0.00228762		447	0.000138		891	0.000599
763	0.000127					830	7.67e-05		902	0.00227767		499	0.000133		979	0.000599
724	0.000122					247	7.62e-05		516	0.00222114		568	0.000132		928	0.00057
780	0.00012					984	7.45e-05		723	0.00221804		154	0.000131		498	0.000567
732	0.000119					550	7.02e-05		1076	0.00220053		522	0.000131		510	0.000552
279	0.000117					443	6.95e-05		1044	0.00219872		567	0.000129		16	0.000529
302	0.000102					838	6.74e-05		1128	0.00219701		371	0.000128		1012	0.000475
818	0.000102					761	6.69e-05		1006	0.002188		105	0.000122		13	0.000475
510	0.000102					325	6.63e-05		326	0.00216796		445	0.000117		950	0.000453
777	0.0001					577	6.63e-05		84	0.00215322		798	0.000115		386	0.000448
306	9.38e-05					959	6.48e-05		414	0.00212625		867	0.000103		278	0.000433
256	9.1e-05					678	6.36e-05		486	0.00211937		678	9.22e-05		961	0.000433
110	8.81e-05					221	6.15e-05		816	0.00211705		191	9.06e-05		699	0.000426
157	8.56e-05					727	6.03e-05		5	0.00211644		526	9.03e-05		384	0.000421
828	7.68e-05					220	5.82e-05		208	0.00209971		797	8.52e-05		273	0.000416
173	7.62e-05					388	5.73e-05		836	0.00206833		357	8.19e-05		292	0.000408
1004	7.55e-05					434	5.73e-05		1032	0.00201967		682	7.98e-05		289	0.000398
853	7.44e-05					441	5.68e-05		203	0.00201708		668	7.82e-05		374	0.000397
968	6.47e-05					990	5.57e-05		481	0.00199935		155	7.33e-05		277	0.000391
339	6.46e-05					68	5.52e-05		1001	0.00198362		505	7.3e-05		281	0.000386
967	6.35e-05					147	5.44e-05		743	0.00198236		148	7.18e-05		493	0.000381
633	5.56e-05					682	5.27e-05		462	0.00196197		877	5.1e-05		25	0.000374
118	5.28e-05					652	5.13e-05		766	0.00195499		99	4.76e-05		514	0.00037
207	5.01e-05					153	5.08e-05		997	0.00194817		500	4.53e-05		285	0.000358
202	4.9e-05					439	5.03e-05		14	0.00192966		463	4.5e-05		280	0.000349
428	4.71e-05					674	4.84e-05		95	0.00191824		320	4.11e-05		1017	0.000344
455	4.63e-05					613	4.75e-05		246	0.00190541		690	3.91e-05		464	0.00034
57	4.14e-05					111	4.62e-05		677	0.00189292		826	3.87e-05		291	0.000335
298	4.14e-05					697	4.46e-05		145	0.00187826		828	3.77e-05		485	0.000331
154	4.13e-05					505	4.14e-05		156	0.001868		239	3.77e-05		29	0.000318
191	4.12e-05					517	3.97e-05		1219	0.00186779		780	3.59e-05		276	0.000315
679	4.04e-05					666	3.79e-05		885	0.00184649		207	3.39e-05		884	0.000313
1017	4e-05					813	3.79e-05		1137	0.00184338		441	2.87e-05		185	0.000307
295	3.52e-05					256	3.46e-05		1022	0.00184158		652	2.73e-05		283	0.0003
34	3.48e-05					371	3.45e-05		509	0.00183502		510	2.73e-05		295	0.000292
525	3.33e-05					757	3.19e-05		346	0.00180503		111	2.59e-05		1015	0.000249
153	3.19e-05					225	3.09e-05		1080	0.00176244		218	2.42e-05		288	0.000246
239	2.96e-05					925	3.03e-05		1043	0.00172513		777	2.33e-05		183	0.000246
441	2.8e-05					797	2.98e-05		1237	0.00170791		721	2.16e-05		495	0.000241
660	2.67e-05					967	2.67e-05		1254	0.00167098		440	2.08e-05		282	0.00022
802	2.6e-05					390	2.61e-05		127	0.00164047		525	2.05e-05		492	0.000215
526	2.43e-05					216	2.6e-05		351	0.0016228		279	1.98e-05		287	0.000206
585	2.32e-05					428	2.18e-05		10	0.00162116		633	1.83e-05		19	0.000204
357	2.27e-05					389	2.12e-05		149	0.00161112		959	1.69e-05		274	0.000189
440	2.24e-05					324	1.9e-05		47	0.00160116		351	1.61e-05		284	0.000189
666	2.19e-05					105	1.78e-05		586	0.00159715		897	1.54e-05		958	0.000188
674	2.08e-05					522	1.77e-05		335	0.00156168		418	1.49e-05		1006	0.000183
552	2.07e-05					977	1.75e-05		313	0.00156149		994	1.47e-05		532	0.000171
798	1.77e-05					155	1.71e-05		435	0.00155066		120	1.46e-05		272	0.00017
865	1.54e-05					397	1.64e-05		1195	0.00154732		4	1.4e-05		298	0.000167
221	1.43e-05					154	1.64e-05		418	0.00152807		10	1.29e-05		530	0.000165
500	1.41e-05					291	1.61e-05		773	0.00151543		57	1.11e-05		290	0.000163
148	1.39e-05					965	1.55e-05		746	0.00147834		764	9.74e-06		415	0.000156
463	1.31e-05					60	1.4e-05		981	0.00147783		679	8.26e-06		296	0.000146
776	1.3e-05					135	1.24e-05		68	0.00146385		717	8.08e-06		986	0.000124
371	1.26e-05					418	1.15e-05		225	0.00145011		153	7.98e-06		189	0.000114
735	1.14e-05					1018	1.04e-05		786	0.00144112		552	7.76e-06		896	0.000104
120	1.14e-05					646	1.03e-05		173	0.00142241		152	6.57e-06		294	8.15e-05
830	1.01e-05					668	9.38e-06		1108	0.00139677		295	5.8e-06		1005	6.72e-05
543	9.17e-06					245	9.21e-06		670	0.00139386		458	5.44e-06		297	6.18e-05
291	8.48e-06					445	8.22e-06		450	0.00138971		222	5.34e-06		890	6.07e-05
88	7.53e-06					308	7.24e-06		617	0.00137413		255	5.21e-06		300	4.62e-05
712	7.22e-06					470	6.17e-06		845	0.00136052		173	4.35e-06		275	4.43e-05
877	5.81e-06					485	5.28e-06		507	0.00135433		88	4.33e-06		22	4.11e-05
240	5.38e-06					660	5.24e-06		950	0.00132586		291	4.29e-06		286	3.84e-05
111	5.15e-06					487	4.36e-06		371	0.001312		686	3.56e-06		479	3.8e-05
135	5.14e-06					132	4.05e-06		1173	0.00129367		28	3.41e-06		271	3.45e-05
314	5.1e-06					447	3.94e-06		362	0.00128288		759	2.96e-06		976	3.33e-05
105	3.92e-06					690	3.53e-06		131	0.00128219		469	2.77e-06		894	2.89e-05
457	3.5e-06					972	2.54e-06		540	0.00127353		543	2.45e-06		987	1.8e-05
652	3.38e-06					717	2.46e-06		956	0.00124414		964	2.44e-06		20	1.5e-05
855	2.84e-06					110	2.3e-06		732	0.00123953		574	2.07e-06		299	1.42e-05
505	2.58e-06					683	2.17e-06		767	0.0012253		802	2.01e-06		974	1.28e-05
618	1.73e-06					399	2.02e-06		195	0.00121189		666	2e-06		507	1.11e-05
759	1.53e-06					191	1.39e-06		399	0.00120207		968	1.38e-06		524	9.92e-06
897	1.51e-06					312	1.2e-06		528	0.00117805		660	1.32e-06		293	9.34e-06
815	1.05e-06					357	1.16e-06		352	0.00116022		824	9.7e-07		975	8.76e-06
867	6.71e-07					421	2.24e-07		140	0.00115802		328	6.93e-07		564	5.46e-06
764	3.94e-07					706	1.81e-07		316	0.00115283		674	4.2e-08		983	3.68e-06
458	2.81e-07					58	8.51e-08		21	0.0011516		990	1.38e-08		501	2.29e-09
									534	0.00114898
									565	0.00112838
									118	0.00112536
									588	0.00112271
									143	0.00109779
									244	0.00107851
									1198	0.00107714
									933	0.00107564
									20	0.00106573
									228	0.00106069
									1027	0.00105979
									801	0.0010585
									186	0.0010548
									856	0.00105283
									493	0.0010319
									361	0.00102403
									150	0.00102318
									838	0.00102311
									1116	0.00101919
									1	0.00101369
									392	0.000991
									820	0.000967
									589	0.000955
									554	0.000934
									400	0.000934
									1090	0.000934
									61	0.000927
									715	0.000915
									1072	0.000891
									1200	0.000876
									66	0.000851
									679	0.000842
									82	0.000838
									938	0.000834
									35	0.000817
									824	0.000808
									366	0.000796
									572	0.00078
									341	0.000773
									581	0.000768
									515	0.000751
									1216	0.00074
									1148	0.000739
									94	0.000717
									1158	0.000716
									591	0.000707
									338	0.000704
									883	0.000702
									976	0.000683
									1045	0.000677
									465	0.000673
									871	0.000671
									1011	0.000669
									491	0.000665
									1202	0.00066
									680	0.000654
									360	0.000652
									52	0.000643
									788	0.000633
									215	0.000627
									1221	0.000617
									639	0.000612
									102	0.00061
									523	0.000608
									857	0.000603
									98	0.000597
									355	0.000572
									240	0.000522
									996	0.000518
									142	0.000517
									178	0.000512
									1217	0.000507
									1029	0.000501
									633	0.000488
									1121	0.000486
									932	0.000477
									1244	0.000471
									980	0.000471
									77	0.000466
									806	0.000464
									1139	0.000456
									757	0.000441
									446	0.000438
									964	0.000436
									332	0.000435
									730	0.000434
									1047	0.000434
									183	0.000408
									108	0.000407
									331	0.000405
									983	0.000393
									85	0.000379
									152	0.000375
									1172	0.00037
									1028	0.000369
									1092	0.000364
									1238	0.00036
									251	0.000351
									675	0.000337
									1069	0.000334
									896	0.00033
									544	0.000329
									729	0.000321
									210	0.00032
									525	0.000316
									712	0.000315
									367	0.000315
									1155	0.000308
									830	0.000304
									1091	0.000302
									87	0.000301
									444	0.000296
									570	0.000293
									375	0.000287
									640	0.000283
									30	0.000281
									271	0.000278
									608	0.00027
									891	0.000268
									176	0.000257
									1093	0.000251
									503	0.000246
									1065	0.000233
									138	0.000232
									136	0.000229
									480	0.000225
									209	0.000224
									1000	0.000222
									995	0.000221
									261	0.000216
									461	0.000203
									377	0.000195
									502	0.000195
									1233	0.000187
									1174	0.000182
									239	0.000181
									539	0.00018
									551	0.000171
									302	0.000165
									770	0.000162
									1181	0.000161
									241	0.000161
									1074	0.00016
									55	0.000155
									840	0.000143
									1194	0.000142
									614	0.000142
									1247	0.000139
									787	0.000139
									329	0.000131
									413	0.000131
									1252	0.000129
									676	0.000126
									206	0.000125
									190	0.000123
									975	0.000119
									661	0.000115
									1048	0.000115
									1013	0.000113
									350	0.000109
									587	0.000105
									869	9.79e-05
									1127	9.75e-05
									669	9.6e-05
									1153	9.59e-05
									744	9.55e-05
									649	9.51e-05
									1038	9.33e-05
									702	9.15e-05
									19	9.14e-05
									833	9.12e-05
									811	8.91e-05
									397	8.8e-05
									850	8.64e-05
									518	8.34e-05
									1191	8.04e-05
									381	7.95e-05
									1234	7.91e-05
									934	7.59e-05
									725	7.51e-05
									303	7.36e-05
									748	6.87e-05
									365	6.68e-05
									1085	6.54e-05
									327	6.48e-05
									417	6.47e-05
									1218	5.95e-05
									291	5.92e-05
									685	5.7e-05
									660	5.27e-05
									415	4.56e-05
									123	4.48e-05
									266	4.15e-05
									1211	3.98e-05
									336	3.84e-05
									870	3.42e-05
									1133	3.27e-05
									843	2.85e-05
									724	2.65e-05
									161	2.51e-05
									753	2.48e-05
									1154	2.46e-05
									1180	2.32e-05
									383	1.85e-05
									345	1.69e-05
									114	1.67e-05
									354	1.51e-05
									901	1.42e-05
									157	1.21e-05
									455	1.05e-05
									566	1.04e-05
									650	8.75e-06
									682	8.56e-06
									137	8.13e-06
									791	8.12e-06
									205	7.93e-06
									460	7.36e-06
									524	6.55e-06
									866	5.16e-06
									212	4.83e-06
									50	4.18e-06
									780	3.39e-06
									181	3.29e-06
									946	3.22e-06
									402	2.71e-06
									308	2.62e-06
									439	2.55e-06
									147	1.83e-06
									1005	1.59e-06
									201	1.2e-06
									959	1.16e-06
									779	1.03e-06
									304	9.34e-07
									969	8.31e-07
									803	7.53e-07
									398	4.56e-07
									541	2.33e-07
									408	1.13e-07
									428	2.22e-10
									197	1.91e-11

## Sheet: Table S1 (D)
Table S1. (D) Silver Human
AC			CT			GAC			LD			MAC			NMBAC			EC
index	score		index	score		index	score		index	score		index	score		index	score		index	score
528	0.0624118		639	0.0912552		144	0.0463169		448	0.17631		528	0.0588601		129	0.285317		751	0.285317
18	0.0607091		665	0.0912288		528	0.0446698		1141	0.173913		18	0.0584175		574	0.282615		752	0.282615
412	0.0565645		95	0.0910396		871	0.0442889		574	0.171579		888	0.0542337		64	0.281484		753	0.281484
922	0.0520986		399	0.0899772		365	0.0436929		1078	0.16884		144	0.05393		125	0.281432		754	0.281432
918	0.0500695		14	0.0839506		18	0.0434813		511	0.168245		588	0.0536817		572	0.27993		755	0.27993
392	0.0499154		441	0.0836705		412	0.0434733		1204	0.166219		412	0.0520461		121	0.279548		756	0.279548
901	0.0472172		296	0.0831038		888	0.0429465		443	0.161243		922	0.0512902		639	0.279319		757	0.279319
588	0.0471947		435	0.0814327		286	0.042461		1073	0.153375		54	0.0500156		577	0.279257		758	0.279257
921	0.0449139		681	0.0806859		361	0.0424092		952	0.152996		84	0.0484625		63	0.278575		759	0.278575
144	0.0437769		651	0.080643		392	0.0421458		259	0.150095		918	0.0483253		573	0.278228		760	0.278228
411	0.0429213		406	0.080109		922	0.0420201		1086	0.1492		392	0.0466525		571	0.27711		761	0.27711
902	0.0423559		539	0.0777929		588	0.041787		2	0.147447		78	0.046605		578	0.276975		762	0.276975
24	0.0407445		322	0.0768774		654	0.0384512		456	0.147439		654	0.0464316		126	0.276519		763	0.276519
391	0.040698		683	0.0767718		918	0.038405		889	0.14719		286	0.0450536		581	0.276145		764	0.276145
286	0.0399129		92	0.0738766		65	0.0380303		254	0.143714		901	0.0446998		631	0.276023		765	0.276023
78	0.0395856		196	0.0727745		901	0.0377095		884	0.139955		708	0.0444955		72	0.27493		766	0.27493
401	0.0393115		518	0.0712968		875	0.0367201		1149	0.138261		648	0.044188		61	0.274926		767	0.274926
84	0.0391838		98	0.0707404		54	0.0364408		385	0.13808		24	0.0429486		68	0.274483		768	0.274483
910	0.0383532		680	0.070544		691	0.0363622		1136	0.137936		921	0.0421943		62	0.274471		769	0.274471
654	0.0383356		638	0.0703075		648	0.0362556		519	0.13767		384	0.0418294		71	0.274378		770	0.274378
409	0.037518		308	0.0697159		181	0.0362371		1212	0.136224		379	0.0415907		130	0.274329		771	0.274329
106	0.0374094		386	0.069289		106	0.0355563		322	0.13479		194	0.0415692		575	0.273886		772	0.273886
408	0.0370927		686	0.0687861		84	0.0351756		897	0.133499		374	0.0413411		582	0.273852		773	0.273852
648	0.0369471		295	0.0686663		340	0.0346911		582	0.133302		739	0.0409083		576	0.273683		774	0.273683
888	0.0368849		319	0.0679686		902	0.0344665		632	0.131079		594	0.0407849		86	0.272951		775	0.272951
534	0.0363118		420	0.0675743		921	0.0342313		947	0.129433		201	0.0403286		73	0.272716		776	0.272716
594	0.0343195		337	0.0674998		78	0.0334145		569	0.129195		377	0.0400798		580	0.272617		777	0.272617
398	0.034287		357	0.0669871		708	0.0323878		330	0.127808		564	0.0399952		84	0.272338		778	0.272338
923	0.0335086		343	0.0668864		346	0.0323371		506	0.12777		902	0.0399848		77	0.271429		779	0.271429
903	0.0332724		534	0.0666115		66	0.0323332		1199	0.127289		381	0.039914		583	0.271125		780	0.271125
403	0.0326202		338	0.0660953		411	0.0322632		267	0.124335		871	0.0397866		80	0.27101		781	0.27101
54	0.0326032		533	0.0656686		594	0.0320063		960	0.124097		894	0.0396508		74	0.270766		782	0.270766
911	0.0324399		356	0.0649573		391	0.0318506		878	0.123389		106	0.0393314		122	0.270425		783	0.270425
374	0.0323906		389	0.0649038		185	0.0315133		1015	0.12242		891	0.0391728		579	0.270399		784	0.270399
400	0.0320843		387	0.0648576		24	0.031387		317	0.119144		889	0.0390456		78	0.270378		785	0.270378
919	0.0317162		504	0.0645398		384	0.0313482		645	0.117182		229	0.0390345		587	0.270291		786	0.270291
194	0.030314		659	0.064256		564	0.0313404		15	0.115875		411	0.0388224		588	0.270062		787	0.270062
989	0.0296218		645	0.0637483		379	0.0310773		826	0.114873		361	0.0384278		69	0.269634		788	0.269634
264	0.0290422		644	0.0632121		891	0.030635		821	0.111407		711	0.0379045		76	0.269548		789	0.269548
466	0.0290255		93	0.0630572		381	0.0305702		204	0.110367		391	0.0368639		585	0.269452		790	0.269452
65	0.0288979		190	0.0629352		201	0.0302612		637	0.10985		365	0.036463		67	0.269449		791	0.269449
243	0.0288895		259	0.0627152		695	0.0300679		834	0.107541		197	0.0363857		65	0.269288		792	0.269288
410	0.0288668		247	0.06241		377	0.0296355		7	0.106496		910	0.0363778		87	0.26922		793	0.26922
393	0.0286749		428	0.062345		575	0.029609		1159	0.104166		547	0.0362857		594	0.269186		794	0.269186
340	0.0284141		536	0.0621805		889	0.0296022		70	0.101447		378	0.0359012		596	0.268814		795	0.268814
381	0.027832		646	0.0619235		894	0.0294874		1010	0.101229		534	0.0356769		70	0.268578		796	0.268578
331	0.0278095		302	0.0618097		401	0.0294679		466	0.100989		204	0.035559		83	0.268461		797	0.268461
992	0.0278093		210	0.0615433		374	0.0294614		380	0.100598		558	0.0351038		90	0.268182		798	0.268182
739	0.0276533		664	0.061349		571	0.0294455		1023	0.0987516		340	0.0348444		89	0.267811		799	0.267811
377	0.0274986		63	0.0610416		366	0.0291813		248	0.0979619		199	0.0348021		66	0.26776		800	0.26776
547	0.0274118		494	0.060537		229	0.0291517		659	0.0965605		401	0.0343667		79	0.267514		801	0.267514
407	0.0273929		660	0.0603582		61	0.0286297		585	0.096385		408	0.0343198		81	0.267459		802	0.267459
384	0.0272067		77	0.059681		796	0.0286007		393	0.0963162		409	0.0342906		635	0.267402		803	0.267402
564	0.0269982		590	0.0596709		409	0.0284579		133	0.0933108		79	0.0336417		584	0.267271		804	0.267271
591	0.0269854		662	0.0592654		558	0.0283047		970	0.0931241		709	0.0335859		591	0.267018		805	0.267018
405	0.026885		438	0.0590728		739	0.028143		191	0.0917678		264	0.0329225		600	0.266954		806	0.266954
708	0.0267251		175	0.0589226		711	0.0280177		1084	0.0915874		398	0.0326933		85	0.266928		807	0.266928
197	0.0265698		674	0.0588001		534	0.0279936		911	0.0909233		138	0.032217		75	0.266877		808	0.266877
891	0.0265652		340	0.058105		547	0.0279612		1100	0.0908626		181	0.0318855		590	0.266773		809	0.266773
894	0.0264733		440	0.0577104		910	0.027903		374	0.0899564		691	0.0318214		586	0.265991		810	0.265991
346	0.0262959		643	0.0576716		331	0.0276733		751	0.0897401		243	0.0316247		595	0.265637		811	0.265637
201	0.0261531		306	0.0576199		194	0.0276031		529	0.0896759		331	0.0313525		593	0.265416		812	0.265416
913	0.0260086		56	0.0575874		408	0.0275696		1147	0.0895766		714	0.0310007		597	0.265207		813	0.265207
365	0.0260049		436	0.0568647		264	0.0274387		522	0.0892581		923	0.0308537		82	0.264619		814	0.264619
796	0.0254754		317	0.0564374		398	0.0272163		592	0.0889897		753	0.0308526		589	0.264591		815	0.264591
413	0.0254063		191	0.0560793		138	0.0268747		756	0.0888025		77	0.0306466		592	0.264105		816	0.264105
258	0.0251549		380	0.0553757		299	0.0268399		126	0.088025		919	0.0306374		599	0.263071		817	0.263071
753	0.0250847		427	0.0551154		378	0.0268174		1210	0.0879167		346	0.0302084		636	0.26121		818	0.26121
229	0.0250642		392	0.0550581		204	0.0263212		700	0.0873969		875	0.030207		633	0.260734		819	0.260734
920	0.0250601		42	0.0545798		350	0.0262784		1004	0.0867061		48	0.0299468		88	0.259209		820	0.259209
558	0.0242636		331	0.0544412		122	0.0257914		763	0.0866975		911	0.0298597		598	0.259036		821	0.259036
531	0.0239235		602	0.0544362		809	0.025734		1096	0.0864036		198	0.0298205		127	0.257656		822	0.257656
138	0.0238913		43	0.0536501		352	0.0254091		940	0.0857995		903	0.0297299		640	0.256294		823	0.256294
832	0.0238027		49	0.0535297		62	0.0253266		196	0.0856051		200	0.0296179		818	0.254987		824	0.254987
915	0.0236367		589	0.0532618		197	0.0251618		459	0.084395		139	0.0294951		142	0.254447		825	0.254447
275	0.0235981		538	0.0527997		293	0.0248483		563	0.0843335		51	0.0294587		815	0.251803		826	0.251803
561	0.0235397		648	0.0527775		923	0.0247385		63	0.0841534		65	0.0294027		305	0.251419		827	0.251419
587	0.0234901		667	0.052701		139	0.024633		185	0.0840068		887	0.0291894		135	0.251036		828	0.251036
51	0.0232391		316	0.0524655		199	0.0244241		1260	0.083646		796	0.0291745		642	0.248601		829	0.248601
272	0.0232329		350	0.0522916		2	0.0242323		517	0.0835308		400	0.0291177		302	0.247272		830	0.247272
711	0.0231457		292	0.0517759		848	0.0240743		437	0.0826244		561	0.0288219		646	0.247191		831	0.247191
79	0.0229238		625	0.051526		400	0.0240636		128	0.0818953		591	0.028549		330	0.24698		832	0.24698
77	0.0229163		301	0.0514119		35	0.0240149		1193	0.0810934		403	0.0285207		148	0.246362		833	0.246362
782	0.0228837		673	0.0513837		403	0.0240031		1067	0.0801979		587	0.028403		813	0.245686		834	0.245686
395	0.0227318		390	0.0510155		903	0.0239845		454	0.0801707		380	0.0281115		632	0.245524		835	0.245524
406	0.0226034		303	0.0510056		561	0.0239768		1215	0.0798905		989	0.0278428		832	0.245506		836	0.245506
66	0.0225868		649	0.0504635		850	0.0239425		819	0.0795485		848	0.0272645		811	0.24546		837	0.24546
139	0.0224379		193	0.0503053		919	0.0238028		1222	0.0791476		649	0.0268869		132	0.245431		838	0.245431
322	0.0223824		161	0.0501604		125	0.0236456		758	0.078559		47	0.0265487		303	0.245008		839	0.245008
483	0.02238		371	0.049903		275	0.0236412		315	0.0777421		373	0.026278		819	0.244615		840	0.244615
809	0.0223008		582	0.0493878		709	0.0236082		580	0.0775883		271	0.02626		638	0.244311		841	0.244311
263	0.0222684		90	0.0489851		79	0.0234687		958	0.0775119		589	0.0262487		123	0.243011		842	0.243011
908	0.0222179		496	0.0487313		119	0.0234147		626	0.0767959		185	0.0260136		128	0.242962		843	0.242962
575	0.022126		553	0.0485773		243	0.0233602		693	0.076652		571	0.025913		812	0.24021		844	0.24021
871	0.0218612		610	0.0482176		911	0.023148		941	0.0764466		275	0.025839		322	0.239562		845	0.239562
119	0.0218497		13	0.0476952		783	0.0230109		888	0.0763271		466	0.0257216		658	0.239393		846	0.239393
326	0.0218145		632	0.0475283		271	0.0228878		1256	0.0762671		61	0.0257194		136	0.239028		847	0.239028
378	0.0215234		321	0.0475066		856	0.0228779		1077	0.0756542		258	0.0256577		321	0.238752		848	0.238752
773	0.0214636		172	0.0472703		48	0.0222563		945	0.0754255		892	0.0256191		659	0.238594		849	0.238594
939	0.0214129		637	0.0472644		841	0.022062		1152	0.0753184		841	0.0255163		308	0.238406		850	0.238406
427	0.0212919		650	0.0470179		782	0.0220266		1130	0.0750417		783	0.0254631		820	0.237524		851	0.237524
299	0.0212697		85	0.046883		272	0.0218817		815	0.0744882		410	0.0252599		652	0.237121		852	0.237121
81	0.0212199		433	0.0465324		6	0.0217722		895	0.0740552		782	0.0251526		306	0.236499		853	0.236499
379	0.0212129		368	0.0463796		649	0.0214609		277	0.0737229		272	0.0251106		816	0.236392		854	0.236392
95	0.0210922		347	0.0463652		591	0.0214581		630	0.0730286		992	0.0249172		840	0.23554		855	0.23554
571	0.0210733		349	0.0463392		362	0.021406		340	0.0729459		695	0.0249006		124	0.235535		856	0.235535
61	0.0210387		679	0.0460147		887	0.0213329		1099	0.0717796		405	0.0247217		657	0.234773		857	0.234773
361	0.0209492		224	0.0455531		51	0.021332		1089	0.0713624		407	0.0246778		134	0.234693		858	0.234693
19	0.0209106		574	0.0453272		992	0.0211578		141	0.07101		781	0.0244448		150	0.23458		859	0.23458
841	0.0208879		624	0.0451429		781	0.0211243		771	0.0706279		707	0.0240953		643	0.234184		860	0.234184
649	0.0208413		599	0.0450337		198	0.0210761		1071	0.0702503		850	0.0240273		309	0.233977		861	0.233977
848	0.0207581		546	0.0450269		989	0.0210737		396	0.0698854		393	0.024012		310	0.233685		862	0.233685
774	0.0207129		685	0.0442553		405	0.0210461		882	0.0691958		413	0.0239444		149	0.233253		863	0.233253
397	0.0207095		336	0.0442005		186	0.0208733		500	0.0687269		773	0.023938		824	0.23318		864	0.23318
479	0.0206912		97	0.0441948		77	0.0207784		311	0.0687209		66	0.0239345		837	0.233135		865	0.233135
924	0.0206889		595	0.0439773		714	0.0205534		189	0.0668173		263	0.023841		304	0.232425		866	0.232425
204	0.0206779		84	0.0437842		862	0.020518		270	0.0667373		293	0.0237347		826	0.23202		867	0.23202
535	0.0206282		636	0.04372		349	0.0204492		328	0.0665713		774	0.0236787		644	0.23138		868	0.23138
529	0.0205764		567	0.0435164		753	0.0204308		1203	0.0662915		920	0.0229015		821	0.231152		869	0.231152
62	0.0205716		382	0.0434445		280	0.0203509		910	0.0660819		913	0.0228008		301	0.231126		870	0.231126
842	0.0204208		678	0.042987		587	0.0203298		469	0.065997		603	0.0227355		660	0.231081		871	0.231081
905	0.0204067		96	0.042941		369	0.0203116		1134	0.0652982		557	0.0227308		838	0.230514		872	0.230514
616	0.0203977		37	0.0422069		603	0.020189		1140	0.0650891		575	0.0227174		328	0.230438		873	0.230438
889	0.0203238		635	0.0421507		393	0.0201551		1162	0.0646017		95	0.0226675		143	0.230238		874	0.230238
929	0.0201991		46	0.0421235		95	0.0201013		844	0.0632705		299	0.0226184		829	0.229782		875	0.229782
783	0.0199764		497	0.0421087		616	0.019974		447	0.0632032		350	0.0225		319	0.229723		876	0.229723
785	0.0199078		246	0.0420516		263	0.0199706		1226	0.0631009		637	0.0224951		131	0.229349		877	0.229349
2	0.0196823		229	0.0420358		785	0.019961		708	0.0628553		81	0.0224696		138	0.228808		878	0.228808
271	0.019636		405	0.0416371		347	0.019892		663	0.0623971		595	0.0224632		634	0.22828		879	0.22828
262	0.0196332		641	0.041391		413	0.0197487		403	0.0622326		809	0.0224567		141	0.228255		880	0.228255
976	0.0195723		252	0.0412836		427	0.0196675		695	0.0619455		712	0.0223151		645	0.228218		881	0.228218
825	0.0195462		588	0.0411522		47	0.0196665		595	0.0618873		616	0.0222652		139	0.228114		882	0.228114
875	0.0195343		439	0.0409603		892	0.0196379		1225	0.0618476		366	0.0222151		823	0.227941		883	0.227941
637	0.019516		254	0.0408586		410	0.0196278		29	0.061807		483	0.0221671		835	0.227443		884	0.227443
47	0.0194084		27	0.0408564		32	0.0194063		594	0.0614911		280	0.0220674		133	0.227287		885	0.227287
629	0.0192816		330	0.0408348		407	0.019374		1033	0.0613958		915	0.0220625		147	0.227072		886	0.227072
856	0.0192637		291	0.0408115		631	0.0193685		532	0.0613446		843	0.022016		314	0.22655		887	0.22655
200	0.019169		587	0.0406032		803	0.0193067		258	0.061069		531	0.021765		831	0.226467		888	0.226467
482	0.0190669		242	0.0405697		182	0.0192678		688	0.0608054		119	0.0217439		320	0.226146		889	0.226146
122	0.0190005		329	0.0404439		629	0.0192129		643	0.060678		908	0.0216385		830	0.226048		890	0.226048
25	0.0189682		585	0.0402248		511	0.0192061		936	0.0606098		137	0.0215868		637	0.224969		891	0.224969
850	0.0189673		634	0.0401839		790	0.0191408		58	0.0604937		140	0.0214568		145	0.224817		892	0.224817
603	0.0189484		596	0.0400957		787	0.0191026		281	0.0603055		785	0.0214528		814	0.224618		893	0.224618
394	0.0189411		41	0.0400909		200	0.0189771		1125	0.0602287		704	0.0214123		653	0.223917		894	0.223917
975	0.0189305		151	0.0400041		380	0.0188063		470	0.0602242		62	0.0213953		327	0.223227		895	0.223227
887	0.0187524		630	0.0398189		342	0.0187953		1008	0.0599605		890	0.0213337		325	0.222714		896	0.222714
293	0.0187383		365	0.0392076		436	0.0187891		832	0.0592094		122	0.0211801		833	0.22229		897	0.22229
930	0.0186861		154	0.0390103		843	0.0187516		265	0.0592031		406	0.0211551		817	0.221946		898	0.221946
589	0.0186432		282	0.0389663		189	0.0187458		674	0.0587337		710	0.0211097		649	0.221234		899	0.221234
605	0.0186204		324	0.0389309		589	0.018745		121	0.0585974		565	0.0209452		655	0.220539		900	0.220539
380	0.0185678		491	0.0388267		483	0.0187279		391	0.0582566		2	0.0209003		307	0.218736		151	0.17631
48	0.0185122		677	0.0386621		258	0.0184105		441	0.0578881		842	0.0208688		311	0.218283		152	0.173913
404	0.0184546		601	0.038445		605	0.0183664		310	0.0578575		535	0.0208544		315	0.218031		153	0.171579
140	0.0184222		44	0.0383836		635	0.0183506		963	0.0578566		856	0.0206888		313	0.216197		154	0.16884
647	0.0184049		208	0.0383809		545	0.0181478		1114	0.0576026		19	0.0206702		641	0.215858		155	0.168245
595	0.0183946		55	0.0383303		773	0.0181461		689	0.0575702		647	0.0206555		318	0.215468		156	0.166219
280	0.0183386		527	0.0382778		557	0.0179457		280	0.0575145		605	0.0204255		822	0.215165		157	0.161243
17	0.0182921		293	0.0382246		338	0.0177596		25	0.0573283		825	0.020114		650	0.215008		158	0.153375
350	0.0182423		434	0.0381575		795	0.0174848		1014	0.0570936		939	0.0200783		316	0.214994		159	0.152996
714	0.0182173		351	0.0380505		344	0.0174827		699	0.0567129		787	0.0200311		839	0.214777		160	0.150095
424	0.0181068		62	0.0378877		939	0.0174682		1197	0.0564535		17	0.0199462		836	0.214268		161	0.1492
511	0.0180946		642	0.0378491		842	0.0174625		333	0.0562018		338	0.0199229		323	0.213431		162	0.147447
527	0.0177547		298	0.0378412		466	0.0174504		65	0.0560964		50	0.0199089		651	0.213352		163	0.147439
787	0.0175849		305	0.0377769		774	0.0174296		1201	0.0553945		529	0.0199079		834	0.212924		164	0.14719
557	0.017476		284	0.0377611		277	0.0174002		1021	0.0550844		395	0.0198712		140	0.211622		165	0.143714
651	0.0174664		532	0.0377456		145	0.0173882		900	0.0550245		193	0.0197954		329	0.21045		166	0.139955
373	0.017325		629	0.0377446		406	0.0173758		44	0.0543278		790	0.0197911		648	0.209807		167	0.138261
332	0.017318		684	0.0376602		920	0.0172778		571	0.0542588		427	0.0197425		324	0.208614		168	0.13808
917	0.0172291		529	0.0375716		140	0.0172096		504	0.0540603		562	0.01971		152	0.208368		169	0.137936
366	0.0170599		289	0.0374099		358	0.0171448		1075	0.0533475		929	0.0195734		825	0.20718		170	0.13767
277	0.0170476		231	0.0372205		137	0.0171038		78	0.0533295		91	0.0195227		312	0.206494		171	0.136224
137	0.0170241		384	0.037062		1	0.0170446		926	0.0532999		352	0.0194346		137	0.206369		172	0.13479
436	0.0168996		517	0.0369661		876	0.0170319		1115	0.0532846		226	0.0193735		656	0.205524		173	0.133499
125	0.0168989		561	0.0369163		284	0.017031		877	0.0530266		592	0.0193593		828	0.201905		174	0.133302
330	0.0167996		370	0.0364198		913	0.0170072		306	0.0524996		930	0.0193492		317	0.201539		175	0.131079
790	0.016768		526	0.0363935		373	0.0169495		907	0.0524691		655	0.0193165		159	0.201135		176	0.129433
781	0.0166934		153	0.0363861		424	0.0167779		752	0.052326		202	0.0192041		146	0.200738		177	0.129195
284	0.0166379		244	0.0363308		91	0.0167639		1026	0.0519154		277	0.0191489		662	0.200709		178	0.127808
936	0.0166334		593	0.0363299		565	0.0167139		531	0.0518291		382	0.0188803		827	0.200421		179	0.12777
344	0.0165538		613	0.0362787		607	0.0166491		1062	0.05143		372	0.0188699		326	0.200251		180	0.127289
655	0.016511		616	0.0362136		655	0.01664		1255	0.0513442		342	0.0187035		156	0.199909		181	0.124335
751	0.0163317		226	0.0361797		860	0.0165888		596	0.051172		768	0.0186391		151	0.199259		182	0.124097
425	0.0162882		218	0.0360813		595	0.0164758		6	0.0503088		262	0.0186125		666	0.197436		183	0.123389
465	0.0162328		6	0.0360342		1007	0.0164068		625	0.0503072		885	0.0185887		160	0.196426		184	0.12242
784	0.0162266		30	0.0360065		353	0.016355		495	0.050282		629	0.0185853		153	0.196223		185	0.119144
565	0.0161093		385	0.035994		712	0.0163486		886	0.0498386		905	0.0184748		669	0.195566		186	0.117182
342	0.0160835		671	0.0358903		562	0.0163211		1188	0.0483425		145	0.0184614		157	0.195414		187	0.115875
1	0.0159788		54	0.0358828		915	0.0162425		81	0.0481347		751	0.0184476		647	0.195329		188	0.114873
904	0.0158531		597	0.0358604		395	0.0162293		247	0.0481041		100	0.0183813		154	0.195162		189	0.111407
97	0.0158228		672	0.0356694		100	0.0161924		727	0.0476842		85	0.0183128		663	0.194149		190	0.110367
741	0.0157436		82	0.035648		784	0.0161124		468	0.0475328		25	0.0182186		144	0.19376		191	0.10985
163	0.0157361		531	0.0353261		647	0.0160055		1051	0.0474144		601	0.0181701		155	0.193372		192	0.107541
347	0.0157298		35	0.0350563		707	0.0159955		445	0.0471396		326	0.0181189		661	0.193161		193	0.106496
419	0.0157165		391	0.0349223		97	0.0159046		573	0.047093		49	0.0181051		654	0.191736		194	0.104166
592	0.0156813		581	0.0348793		576	0.015847		1003	0.0468905		741	0.018019		158	0.190974		195	0.101447
198	0.0156236		195	0.0347628		126	0.0158027		1036	0.0468582		284	0.017976		161	0.190331		196	0.101229
926	0.0155892		583	0.0347369		121	0.0155937		373	0.0468438		705	0.0179205		162	0.189964		197	0.100989
607	0.0152628		623	0.0347355		541	0.0155261		1224	0.0467487		55	0.0179169		165	0.188893		198	0.100598
673	0.015222		253	0.0347178		604	0.0154905		484	0.0465834		97	0.0178736		164	0.18889		199	0.0987516
145	0.0151531		594	0.0346572		601	0.0154672		453	0.0464807		362	0.0178391		167	0.188206		200	0.0979619
843	0.0151226		239	0.0342918		572	0.0153752		636	0.0463414		803	0.0177963		177	0.188085		201	0.0965605
935	0.0151155		373	0.0342207		535	0.0153621		406	0.0457982		784	0.0177333		665	0.187343		202	0.096385
906	0.0150049		238	0.0340572		930	0.0153322		59	0.0454863		424	0.0177132		664	0.187208		203	0.0963162
532	0.0149658		344	0.0338542		852	0.0153134		973	0.0452057		555	0.0176377		178	0.186563		204	0.0933108
199	0.0149558		240	0.0337483		610	0.0152916		781	0.044769		80	0.0175868		173	0.185853		205	0.0931241
417	0.0149438		600	0.0337063		637	0.01521		1192	0.0445145		44	0.0175799		672	0.185431		206	0.0917678
707	0.0148915		299	0.033675		531	0.0151194		1083	0.0443236		607	0.0174902		668	0.185293		207	0.0915874
226	0.0148641		281	0.0335387		908	0.0150506		562	0.0442665		559	0.0174832		171	0.184677		301	0.0912552
768	0.0148196		515	0.0334465		501	0.015048		510	0.0441863		976	0.0172734		172	0.184545		302	0.0912288
6	0.014786		300	0.0333191		113	0.0150004		279	0.0439676		35	0.0172605		667	0.18418		303	0.0910396
100	0.0146866		398	0.0332625		202	0.0149098		999	0.043872		347	0.0172438		169	0.182878		208	0.0909233
282	0.0146658		592	0.0329442		354	0.0148899		508	0.043459		604	0.0171951		670	0.182066		209	0.0908626
704	0.0145913		348	0.0328903		425	0.0148285		1209	0.0433716		924	0.0171555		168	0.181809		304	0.0899772
604	0.0145517		186	0.0327801		929	0.0147945		1037	0.0433035		882	0.0171553		166	0.181748		210	0.0899564
85	0.0145393		148	0.0327787		857	0.0146854		722	0.0429951		436	0.0170094		176	0.180421		211	0.0897401
932	0.0145082		323	0.0324996		651	0.0144721		894	0.0429649		397	0.0170086		163	0.179796		212	0.0896759
231	0.0144578		271	0.0323906		632	0.0144576		658	0.0428587		479	0.0169506		674	0.179527		213	0.0895766
420	0.0144422		267	0.0323606		262	0.0144198		214	0.0426473		651	0.0169465		180	0.179218		214	0.0892581
709	0.0144091		7	0.0323224		81	0.0143776		1163	0.0426283		738	0.0168513		174	0.178673		215	0.0889897
179	0.0143662		378	0.0323116		31	0.0143703		33	0.0425926		975	0.0167718		170	0.178037		216	0.0888025
836	0.0142833		47	0.0322724		5	0.0142521		852	0.0424418		795	0.0167641		677	0.177217		217	0.088025
803	0.0141388		341	0.0322562		890	0.0141438		421	0.042437		610	0.0167577		687	0.176959		218	0.0879167
937	0.0141259		181	0.0320174		382	0.0140483		485	0.0421745		349	0.0166745		688	0.176694		219	0.0873969
892	0.0141178		86	0.0319038		592	0.0140145		296	0.04214		527	0.0166464		675	0.176672		220	0.0867061
185	0.0140934		294	0.0318751		794	0.0139926		814	0.0420463		482	0.0166008		175	0.176231		221	0.0866975
795	0.0140889		4	0.0318394		936	0.013871		1161	0.0420244		125	0.0165653		676	0.176213		222	0.0864036
50	0.0139836		169	0.0317044		905	0.0138651		747	0.0419012		332	0.0164679		671	0.175948		223	0.0857995
429	0.0139546		34	0.0309468		482	0.0137666		1138	0.0418232		32	0.0164599		690	0.174402		224	0.0856051
852	0.0139376		183	0.030836		397	0.0137316		202	0.0417305		231	0.0164485		681	0.173794		225	0.084395
80	0.0139244		287	0.0307874		332	0.0135751		343	0.0414368		511	0.0164402		686	0.173005		226	0.0843335
792	0.0138429		334	0.0306682		879	0.0135399		1251	0.0411269		74	0.0162892		682	0.172948		227	0.0841534
610	0.0138277		547	0.0305564		559	0.0135132		151	0.0405162		6	0.0162455		679	0.172937		228	0.0840068
181	0.0138275		11	0.0304316		704	0.0131856		1177	0.0402305		936	0.0162307		678	0.172644		305	0.0839506
311	0.0137597		249	0.0303674		555	0.0130307		1168	0.0395434		742	0.0162081		673	0.172324		306	0.0836705
338	0.0137526		576	0.0302413		792	0.0129858		951	0.0394945		884	0.0161889		179	0.171979		229	0.083646
916	0.0137139		512	0.0301766		615	0.012979		384	0.0393236		917	0.0161018		683	0.171927		230	0.0835308
43	0.0134395		342	0.0300794		163	0.0129091		1042	0.0393214		862	0.0160366		684	0.170743		307	0.0831038
738	0.0134283		615	0.0300562		924	0.012879		810	0.039179		192	0.0159362		680	0.170464		231	0.0826244
691	0.0134272		327	0.0300534		282	0.0128538		122	0.0391414		852	0.0159019		689	0.168141		232	0.0818953
426	0.0134065		383	0.0299103		696	0.0128256		405	0.0390753		1007	0.0158066		685	0.166262		308	0.0814327
21	0.0133098		28	0.0298866		426	0.0128024		1066	0.0390729		344	0.0157595		226	0.144017		233	0.0810934
562	0.0132943		307	0.0298848		333	0.0127367		12	0.0388087		113	0.0157417		234	0.138567		309	0.0806859
228	0.013272		551	0.0298029		710	0.012733		925	0.0386654		163	0.0157137		228	0.138065		310	0.080643
20	0.0132718		426	0.0296703		50	0.0127327		264	0.0386521		182	0.0155304		229	0.135274		234	0.0801979
44	0.0132667		666	0.0295913		69	0.0127293		412	0.0384159		425	0.0155206		231	0.135177		235	0.0801707
631	0.0131881		372	0.0295485		673	0.0126552		634	0.0383847		926	0.0154911		223	0.1349		311	0.080109
256	0.0131565		1	0.0295443		49	0.0125114		684	0.0381772		673	0.0154788		236	0.134813		236	0.0798905
312	0.0131398		232	0.0295099		19	0.0124606		538	0.0380703		631	0.0154406		217	0.133842		237	0.0795485
742	0.0130305		328	0.0295085		179	0.0124383		256	0.0380647		230	0.015426		233	0.133379		238	0.0791476
313	0.0128163		537	0.0293722		212	0.0124248		905	0.03805		43	0.0153235		224	0.133013		239	0.078559
55	0.0127667		575	0.0292663		864	0.0124237		13	0.038046		333	0.0151338		230	0.129922		312	0.0777929
846	0.0127667		375	0.029101		55	0.0123941		579	0.0377798		228	0.0150908		225	0.129259		240	0.0777421
35	0.0127579		203	0.0290091		515	0.0123927		1129	0.0375392		186	0.0150489		214	0.127989		241	0.0775883
352	0.012756		617	0.0288351		529	0.0123018		837	0.037495		465	0.0148898		227	0.127323		242	0.0775119
102	0.0126928		676	0.0287813		143	0.0120514		1240	0.0374658		560	0.0148291		222	0.126576		313	0.0768774
615	0.0126797		377	0.0286612		868	0.0120236		369	0.0371443		1	0.0147093		221	0.126395		243	0.0767959
794	0.0126695		245	0.0284879		429	0.0119577		610	0.0369495		532	0.014696		215	0.126159		314	0.0767718
577	0.0126633		569	0.0284123		17	0.0119074		621	0.0367889		394	0.0146619		220	0.124741		244	0.076652
423	0.0126481		286	0.0284068		885	0.0118636		1098	0.0367169		134	0.0145172		211	0.123094		245	0.0764466
113	0.0126085		431	0.028376		858	0.011833		655	0.0365373		256	0.0144536		213	0.122612		246	0.0763271
890	0.012596		519	0.0282456		512	0.0118068		90	0.0361288		179	0.0144165		239	0.121996		247	0.0762671
695	0.0125653		91	0.0279717		935	0.011794		769	0.0354626		744	0.0142947		218	0.121367		248	0.0756542
91	0.0125622		198	0.027929		394	0.0116822		642	0.0353354		828	0.014287		240	0.120549		249	0.0754255
32	0.012537		393	0.0279287		404	0.011677		436	0.0353274		417	0.0142834		219	0.119175		250	0.0753184
555	0.0124537		524	0.0278967		351	0.0115296		28	0.0353243		234	0.0142075		216	0.118723		251	0.0750417
234	0.0122868		76	0.0278865		976	0.0115064		382	0.0351994		419	0.0141924		232	0.116812		252	0.0744882
349	0.0122841		22	0.0278673		975	0.0115037		721	0.0347737		143	0.0141806		237	0.116558		253	0.0740552
521	0.0122372		39	0.0278194		417	0.0114956		252	0.034772		935	0.0141496		235	0.112869		315	0.0738766
993	0.0122371		8	0.027725		184	0.01142		909	0.0345589		404	0.0141495		212	0.111203		254	0.0737229
372	0.0121666		627	0.0277055		420	0.0114084		499	0.0345158		895	0.0140876		738	0.106636		255	0.0730286
979	0.0121633		233	0.0276945		419	0.0114076		847	0.0344225		932	0.0140358		739	0.106231		256	0.0729459
141	0.0121553		663	0.0276869		302	0.0114056		97	0.0343123		650	0.0140176		741	0.105666		316	0.0727745
74	0.0121505		5	0.0272796		926	0.0114028		378	0.034098		993	0.0140093		727	0.105136		257	0.0717796
362	0.0121307		611	0.0272628		937	0.0113998		139	0.0339703		20	0.0139774		733	0.104555		258	0.0713624
501	0.0121131		320	0.0271875		869	0.0113878		1113	0.0335164		794	0.0139673		744	0.103412		317	0.0712968
315	0.0120604		326	0.0271751		932	0.0113799		1012	0.0335029		420	0.0139088		746	0.102543		259	0.07101
772	0.0120142		397	0.0270733		25	0.0113609		1183	0.0334647		615	0.0138385		735	0.102193		318	0.0707404
948	0.0119607		419	0.0268438		623	0.0113106		899	0.0334346		769	0.013821		724	0.102183		260	0.0706279
822	0.011896		189	0.0268193		854	0.011294		978	0.033394		426	0.0136022		730	0.100987		319	0.070544
884	0.0118723		670	0.0267536		226	0.0112872		91	0.0332957		369	0.0135007		737	0.099681		320	0.0703075
885	0.0118678		418	0.0263896		741	0.0112417		1146	0.0332934		259	0.0134313		734	0.0996589		261	0.0702503
133	0.0117679		258	0.0261847		94	0.01121		1050	0.033156		282	0.013393		743	0.0988534		262	0.0698854
473	0.0117294		543	0.0260647		863	0.0111909		1057	0.0330355		737	0.0133555		731	0.0985424		321	0.0697159
882	0.0117249		270	0.0259879		231	0.0111845		207	0.032958		904	0.0133452		721	0.0976209		322	0.069289
685	0.0115895		492	0.0259585		519	0.0110315		144	0.032872		545	0.0131885		736	0.0975512		263	0.0691958
146	0.0115146		572	0.0257524		193	0.0110169		567	0.0326763		860	0.0131878		742	0.0971887		323	0.0687861
974	0.0114944		669	0.0256882		993	0.0110012		275	0.0326214		577	0.0131321		725	0.0957218		264	0.0687269
134	0.0114937		354	0.0254307		579	0.0109813		547	0.0324544		541	0.0130371		740	0.095692		265	0.0687209
1007	0.0114737		174	0.0254		853	0.010966		184	0.0323406		189	0.0129799		750	0.0955702		324	0.0686663
650	0.0114649		429	0.0250345		479	0.010938		809	0.0319355		792	0.0129191		726	0.0934801		325	0.0679686
862	0.0114351		176	0.0249042		948	0.010884		558	0.0315378		702	0.0128748		747	0.093312		326	0.0675743
402	0.0114265		184	0.0246242		917	0.0108538		69	0.0315125		845	0.0128565		728	0.0920677		327	0.0674998
533	0.0113788		251	0.0246172		873	0.0108418		648	0.0315063		121	0.0128038		723	0.0919744		328	0.0669871
744	0.0113674		273	0.024195		845	0.010816		711	0.0315055		501	0.0128017		749	0.0902135		329	0.0668864
710	0.0113672		152	0.0240288		560	0.0107989		420	0.0312793		94	0.012751		729	0.0900441		266	0.0668173
241	0.0113001		495	0.0239526		650	0.0107962		553	0.0308453		906	0.0127458		732	0.0893599		267	0.0667373
606	0.0112914		335	0.0239183		798	0.0107795		710	0.0308204		653	0.0127436		722	0.0871416		330	0.0666115
635	0.0112527		414	0.023861		768	0.0107582		319	0.0306661		836	0.0126832		35	0.0867002		268	0.0665713
193	0.0112285		48	0.0238351		44	0.0107578		76	0.0306264		606	0.0126531		365	0.0855465		269	0.0662915
259	0.0112021		525	0.0237352		85	0.010721		741	0.0305452		937	0.0126099		745	0.0823768		331	0.0660953
175	0.0111819		236	0.023483		335	0.0107167		427	0.0303522		335	0.0124787		39	0.0803245		270	0.0660819
769	0.0111691		75	0.0234247		960	0.0106616		1124	0.030352		916	0.0124692		238	0.0783131		271	0.065997
934	0.0111604		78	0.0233517		606	0.0106393		994	0.0302935		645	0.0124523		361	0.078148		332	0.0656686
845	0.0110558		424	0.0231735		793	0.0106199		774	0.0302697		358	0.0123424		366	0.0765754		272	0.0652982
667	0.0110492		207	0.0230308		356	0.0105549		1061	0.0302514		533	0.0123397		32	0.0729071		273	0.0650891
369	0.011042		32	0.0229496		699	0.0105438		432	0.0300184		602	0.0123321		31	0.0725768		333	0.0649573
602	0.0110235		58	0.0229302		872	0.0105259		321	0.0299824		590	0.0123219		369	0.0721136		334	0.0649038
670	0.0110048		523	0.0229276		359	0.0105094		706	0.0299273		572	0.0122866		622	0.0691942		335	0.0648576
230	0.0109148		159	0.0228535		343	0.0105075		988	0.0297861		429	0.0122479		609	0.0690885		274	0.0646017
517	0.0109145		33	0.0228089		653	0.0104869		825	0.0297826		56	0.0122091		871	0.0675757		336	0.0645398
854	0.0108972		618	0.022716		372	0.0104235		449	0.029755		233	0.0121948		875	0.0661363		337	0.064256
325	0.0108867		565	0.0226965		705	0.0103463		180	0.029675		623	0.0121811		36	0.0658316		338	0.0637483
189	0.0108244		256	0.0226831		438	0.0103416		1094	0.0296239		635	0.0121648		545	0.0652722		275	0.0632705
121	0.010816		25	0.0225997		274	0.0103406		749	0.029282		307	0.0121453		619	0.0647624		339	0.0632121
170	0.0108104		345	0.0221609		602	0.0102315		949	0.0291872		473	0.0121234		748	0.0643427		276	0.0632032
996	0.0107751		379	0.0219786		183	0.0101684		1246	0.0291724		313	0.0120697		112	0.0639276		277	0.0631009
396	0.0107677		376	0.0219327		614	0.010166		23	0.028978		517	0.0120439		617	0.0637876		340	0.0630572
274	0.0107595		580	0.0217628		102	0.0101601		1101	0.0289257		31	0.0119973		620	0.0635195		341	0.0629352
623	0.010692		83	0.0217502		146	0.0101502		789	0.0286926		678	0.0119835		608	0.0630472		278	0.0628553
186	0.010633		620	0.021653		364	0.0100883		342	0.0286168		37	0.0119469		601	0.0628832		342	0.0627152
316	0.0106104		280	0.0216182		134	0.0100617		464	0.0285851		376	0.0119323		99	0.0627414		1	0.0624118
23	0.0105954		579	0.0215826		341	0.0100612		217	0.0285305		146	0.0118894		602	0.062738		343	0.06241
601	0.0105851		204	0.0212111		884	0.010049		799	0.0283485		260	0.0118469		621	0.0615302		279	0.0623971
168	0.0105514		257	0.0211773		363	0.0100363		22	0.028291		772	0.0118439		613	0.0612177		344	0.062345
5	0.0104825		274	0.0210697		742	0.0100298		1088	0.0282638		948	0.011822		708	0.0606146		280	0.0622326
998	0.0104802		194	0.0208484		516	0.00991829		18	0.028226		999	0.0117764		603	0.060552		345	0.0621805
572	0.0104268		81	0.0205017		230	0.00990473		873	0.0281165		141	0.0117709		606	0.0605233		281	0.0619455
56	0.0103978		250	0.0203902		807	0.00988673		1087	0.0280945		857	0.0117509		604	0.0600803		346	0.0619235
94	0.0103319		202	0.0203735		234	0.00986668		269	0.0279443		274	0.011738		541	0.0599312		282	0.0618873
486	0.0102127		622	0.0203656		751	0.00985636		295	0.0278716		876	0.011692		611	0.0599105		283	0.0618476
927	0.0102023		498	0.0203241		80	0.00981931		736	0.0277827		974	0.0116913		618	0.0594884		347	0.0618097
821	0.0101966		578	0.0200595		859	0.00981424		1079	0.0276759		59	0.0116785		549	0.0593649		284	0.061807
212	0.0101509		333	0.020056		141	0.00972064		853	0.0275449		644	0.0116656		625	0.0590498		348	0.0615433
746	0.0101503		614	0.0199125		527	0.00968721		88	0.0275029		133	0.0115959		614	0.0588293		285	0.0614911
705	0.0101432		12	0.0198174		882	0.00966485		818	0.0274031		241	0.011575		103	0.0588033		286	0.0613958
143	0.0101378		545	0.0198156		804	0.00963375		972	0.0272676		170	0.0115638		612	0.0587573		349	0.061349
614	0.0101352		255	0.0197626		636	0.0095676		924	0.0269826		614	0.0115432		605	0.0585716		287	0.0613446
351	0.0101189		237	0.0196448		259	0.00956462		117	0.0267293		168	0.0114709		626	0.0584687		288	0.061069
857	0.010065		188	0.0195974		667	0.00952831		512	0.0266823		585	0.0113808		615	0.0583924		350	0.0610416
645	0.0100312		2	0.0194643		74	0.00944291		1167	0.0266579		52	0.0113699		627	0.0582919		289	0.0608054
104	0.0100064		540	0.0191624		104	0.00940002		169	0.0266302		760	0.0113692		630	0.0580637		2	0.0607091
612	0.0100041		200	0.0190118		904	0.00938763		1035	0.0266189		21	0.011358		108	0.0580056		290	0.060678
756	0.0099987		79	0.0188298		465	0.00931956		653	0.0266078		521	0.0113184		412	0.0579994		291	0.0606098
860	0.00999018		268	0.0187923		895	0.00927001		805	0.0265576		102	0.0112824		711	0.0579151		351	0.060537
260	0.00996785		425	0.0186955		999	0.0092621		989	0.0265284		83	0.0112554		93	0.0577622		292	0.0604937
515	0.00995664		310	0.0186905		273	0.00925163		1041	0.0262745		731	0.0111978		624	0.057717		352	0.0603582
895	0.00988687		544	0.0185158		93	0.00917229		1049	0.0261496		311	0.0111448		607	0.0576912		293	0.0603055
236	0.00980733		552	0.0184685		532	0.00912016		4	0.0259911		224	0.0111298		105	0.0576437		294	0.0602287
382	0.00977026		550	0.0184582		738	0.00910706		282	0.0258437		817	0.0110673		107	0.0575986		295	0.0602242
335	0.00976223		149	0.0182381		114	0.00910181		1016	0.0258283		93	0.011005		92	0.0572305		296	0.0599605
560	0.00974131		177	0.0181412		906	0.00909796		533	0.0257998		979	0.0110034		117	0.0572295		353	0.059681
999	0.00974113		530	0.018114		744	0.00906655		516	0.0257971		670	0.0109368		109	0.0570997		354	0.0596709
166	0.00973718		288	0.0180655		423	0.00891691		407	0.0256761		814	0.0109292		610	0.0570472		355	0.0592654
92	0.00970688		631	0.0179714		693	0.00886565		54	0.0256308		273	0.0108908		623	0.0565925		297	0.0592094
333	0.00963681		36	0.0179474		228	0.00885618		668	0.025586		667	0.0108553		40	0.0563308		298	0.0592031
840	0.00962767		394	0.0179295		670	0.00883462		735	0.0255078		82	0.0108282		91	0.0561724		356	0.0590728
576	0.00961872		566	0.0179137		92	0.00876036		168	0.0254598		715	0.0108052		94	0.056015		357	0.0589226
678	0.00955963		421	0.0178619		517	0.00873859		1220	0.025164		92	0.0107804		96	0.0559545		451	0.0588601
464	0.0095559		230	0.0176508		934	0.00871472		600	0.0251617		998	0.0107486		110	0.0559099		358	0.0588001
93	0.00952583		628	0.0174767		260	0.00869227		790	0.0251463		104	0.0107257		628	0.0555326		299	0.0587337
644	0.00947797		573	0.017454		678	0.00860925		742	0.0249884		746	0.0107182		98	0.0553057		300	0.0585974
987	0.00943479		182	0.0174355		946	0.00855441		1150	0.0248494		632	0.0106774		111	0.0552978		452	0.0584175
823	0.00939933		437	0.0173058		486	0.00855332		386	0.0248392		486	0.0105917		120	0.0551421		359	0.058105
22	0.00937275		70	0.0171614		916	0.00850047		1245	0.0248162		576	0.0105738		194	0.0549358		360	0.0577104
653	0.00937074		201	0.0171598		817	0.00849289		720	0.024732		883	0.0104897		116	0.0548719		361	0.0576716
760	0.00933815		275	0.0171585		612	0.00842215		1142	0.0246461		315	0.0104836		362	0.0548431		362	0.0576199
793	0.00929621		366	0.017057		870	0.00842163		1112	0.0246299		23	0.0104667		101	0.0547804		363	0.0575874
82	0.00929091		548	0.016952		322	0.00841106		111	0.0246022		756	0.0104506		616	0.0547431		364	0.0568647
590	0.00928174		219	0.0169363		233	0.00834563		762	0.024389		934	0.0104426		197	0.0541244		3	0.0565645
940	0.00921976		87	0.0168126		294	0.00832983		1230	0.0243748		423	0.0104351		115	0.0532436		365	0.0564374
585	0.0092154		369	0.0167491		645	0.00830882		957	0.0241677		175	0.0104151		714	0.0531449		366	0.0560793
788	0.00918284		209	0.0167083		692	0.00824745		913	0.0241369		853	0.0103533		118	0.0529068		367	0.0553757
869	0.00916898		29	0.0166227		825	0.00821942		718	0.0240844		740	0.0103237		104	0.0528212		368	0.0551154
438	0.00915918		541	0.0166002		542	0.00819055		1097	0.0239823		973	0.0103129		392	0.0524883		369	0.0550581
399	0.00915808		260	0.0163992		43	0.00817934		1104	0.0239564		353	0.0103081		100	0.0516688		370	0.0545798
712	0.00914332		503	0.0163537		786	0.00817342		1020	0.023949		685	0.0101654		97	0.051407		371	0.0544412
530	0.00908952		94	0.0162133		998	0.00817163		1176	0.0239015		343	0.0101626		95	0.0511793		372	0.0544362
278	0.00908001		160	0.0161799		577	0.00816178		288	0.0238244		846	0.0101591		114	0.0511582		453	0.0542337
847	0.00902426		205	0.0158051		450	0.00806951		364	0.0237237		126	0.0101572		201	0.0511222		454	0.05393
512	0.00897676		277	0.0153891		256	0.00806292		390	0.02341		793	0.0100767		102	0.0510804		455	0.0536817
488	0.00893935		222	0.0153821		814	0.00798549		112	0.0232978		5	0.0100423		629	0.0508995		373	0.0536501
273	0.00890348		71	0.0151715		788	0.00797964		1166	0.0232777		236	0.00999167		707	0.0507304		374	0.0535297
126	0.00885614		73	0.0151601		9	0.00791522		1239	0.0231756		464	0.00992621		113	0.0499949		375	0.0532618
933	0.00878028		61	0.0151546		192	0.00788378		979	0.0230599		149	0.00988751		879	0.0484879		376	0.0527997
758	0.00877952		432	0.015093		489	0.00788174		260	0.0230071		489	0.00982105		922	0.047814		377	0.0527775
341	0.00877003		502	0.0149817		441	0.00787823		222	0.0229999		798	0.00979377		204	0.0476534		378	0.052701
972	0.00875124		355	0.0148495		769	0.00781854		458	0.0229537		786	0.00977819		710	0.0470366		379	0.0524655
835	0.00872563		64	0.0147719		874	0.00780755		159	0.0229216		743	0.00976008		709	0.0469428		380	0.0522916
302	0.00872561		51	0.0147016		806	0.00778861		784	0.02291		821	0.00971681		704	0.0467836		4	0.0520986
149	0.008721		653	0.0146831		846	0.00773057		1025	0.0228127		341	0.00968726		60	0.0463554		456	0.0520461
487	0.00865762		40	0.014614		624	0.00763502		930	0.0226895		854	0.00966535		119	0.0461453		381	0.0517759
973	0.00865661		243	0.0145656		618	0.00762967		411	0.0226757		512	0.0096334		411	0.0460855		382	0.051526
853	0.00864555		401	0.0145344		851	0.00761635		846	0.0225968		136	0.00957302		363	0.0459706		383	0.0514119
233	0.00855322		26	0.0143585		866	0.00760787		242	0.0225603		212	0.00955376		106	0.0458371		384	0.0513837
946	0.008508		23	0.0139179		1008	0.0075992		609	0.0224757		530	0.00955274		200	0.045794		457	0.0512902
489	0.00850074		235	0.0139154		149	0.00758902		92	0.0224093		488	0.00949541		391	0.0453885		385	0.0510155
737	0.00848642		180	0.0138179		644	0.00756689		483	0.0221845		245	0.00947441		876	0.0453022		386	0.0510056
414	0.0084696		197	0.0135608		533	0.00756162		105	0.0220938		354	0.00946496		901	0.0445897		387	0.0504635
329	0.00844397		404	0.0133263		861	0.00744177		154	0.0219824		823	0.00946067		401	0.0438893		388	0.0503053
757	0.00844031		598	0.01319		496	0.00742012		132	0.0219499		45	0.00941151		918	0.0437052		389	0.0501604
960	0.00842693		422	0.0127879		175	0.00741835		798	0.0219363		593	0.00939246		546	0.0433431		5	0.0500695
581	0.00839141		225	0.0126575		488	0.00741755		62	0.0218897		996	0.00935121		697	0.0428958		458	0.0500156
545	0.00836296		352	0.0126179		20	0.0074159		898	0.0217801		515	0.00931719		542	0.0425879		6	0.0499154
907	0.00833773		520	0.0124302		348	0.00737448		130	0.0217492		252	0.00928937		705	0.042555		390	0.049903
59	0.00831485		272	0.0124055		487	0.00736657		631	0.0216182		325	0.00923727		409	0.0422555		391	0.0493878
786	0.00831149		413	0.0122089		590	0.00734342		851	0.0214076		612	0.00917693		702	0.041296		392	0.0489851
246	0.008311		279	0.0115533		979	0.00733325		73	0.0213838		166	0.00913769		921	0.0408063		393	0.0487313
632	0.00827936		586	0.0115039		52	0.00732336		697	0.0213117		316	0.00909001		902	0.0394691		394	0.0485773
559	0.00827859		315	0.0114123		115	0.00731864		474	0.0211325		438	0.00907071		408	0.0391164		459	0.0484625
914	0.00827718		206	0.0113782		685	0.00731784		476	0.0211281		788	0.0090465		198	0.0389984		460	0.0483253
83	0.00825712		285	0.0109938		56	0.00730655		471	0.0211048		302	0.00895405		199	0.0387666		395	0.0482176
697	0.00821067		187	0.0109078		974	0.00730497		188	0.0209586		758	0.00894578		712	0.038397		396	0.0476952
641	0.00817645		157	0.0108711		445	0.00722828		616	0.0209096		927	0.0089126		33	0.0382978		397	0.0475283
519	0.0081288		484	0.010871		996	0.00722607		106	0.0207985		946	0.00889927		398	0.0373471		398	0.0475066
245	0.00812492		584	0.0108584		435	0.00719641		274	0.0207437		196	0.00888592		715	0.0370302		399	0.0472703
469	0.00799662		228	0.0107875		772	0.00716795		908	0.0207152		864	0.00888148		364	0.0369062		400	0.0472644
192	0.0079783		568	0.0107671		433	0.00712639		348	0.0206368		868	0.0088373		193	0.0368701		7	0.0472172
114	0.00792801		10	0.0107496		37	0.00709519		536	0.0205073		402	0.00881811		403	0.0366954		8	0.0471947
689	0.00791763		312	0.0106343		168	0.00705467		912	0.0205064		766	0.00880021		873	0.0366789		401	0.0470179
844	0.00791167		99	0.01062		832	0.00702918		692	0.0204128		886	0.00873563		427	0.0366441		402	0.046883
224	0.00784888		69	0.0105435		285	0.00702714		182	0.020378		14	0.00871739		370	0.0365656		461	0.0466525
566	0.00780267		468	0.0105037		943	0.00697137		358	0.0202891		227	0.00871542		400	0.0365432		462	0.046605
416	0.0078013		74	0.0104812		507	0.00687663		683	0.0202456		246	0.00871074		910	0.0357255		403	0.0465324
29	0.00779515		412	0.0104707		694	0.00687647		862	0.0201597		960	0.00869427		38	0.0356966		463	0.0464316
182	0.00774021		471	0.0103535		376	0.00685422		716	0.0201186		195	0.00868536		53	0.0344854		404	0.0463796
202	0.0077368		453	0.0103106		133	0.00684492		327	0.0201064		706	0.00867441		367	0.0344715		405	0.0463652
986	0.00764889		88	0.0102837		521	0.00681035		300	0.020026		869	0.00866012		716	0.0344096		406	0.0463392
864	0.00764585		606	0.0102426		402	0.00677278		67	0.0199892		312	0.00864806		2	0.0343558		601	0.0463169
86	0.00764068		621	0.00995218		396	0.00677125		195	0.0199414		832	0.00863504		706	0.03414		407	0.0460147
798	0.00752864		50	0.00986449		36	0.00675623		872	0.0197547		487	0.00859898		701	0.0337836		408	0.0455531
213	0.00752325		45	0.00970434		278	0.00675233		831	0.0197508		114	0.00859375		543	0.0336212		409	0.0453272
136	0.00752301		155	0.0096001		213	0.00674813		125	0.0196539		396	0.00859024		698	0.0334609		410	0.0451429
525	0.00751743		381	0.00948185		652	0.00673184		1214	0.0196478		566	0.00858488		410	0.0333725		464	0.0450536
851	0.00750436		549	0.00944998		136	0.00672269		167	0.0196022		987	0.00855694		393	0.0332673		411	0.0450337
671	0.00749775		655	0.00910202		689	0.00669786		575	0.0195908		213	0.00853637		192	0.0331225		412	0.0450269
877	0.00746353		173	0.00904834		639	0.00661909		987	0.0195479		73	0.00849317		45	0.0330396		9	0.0449139
252	0.0074466		430	0.00896308		330	0.00661205		590	0.0195271		278	0.00829666		1	0.032936		465	0.0446998
49	0.00742805		500	0.00892756		170	0.00660614		216	0.0194577		29	0.00824954		436	0.0325871		602	0.0446698
73	0.0074148		112	0.00880819		473	0.00660438		546	0.0193133		652	0.0082473		923	0.0324058		466	0.0444955
656	0.00736689		457	0.00879029		737	0.00659872		457	0.0192329		76	0.00824158		424	0.032272		603	0.0442889
983	0.00736599		658	0.00873434		585	0.00650855		344	0.0192328		879	0.00818563		46	0.0322166		413	0.0442553
359	0.00733373		522	0.00871156		39	0.00648048		760	0.0192157		22	0.00807342		407	0.0321173		414	0.0442005
153	0.00732449		9	0.00845336		505	0.00644037		823	0.019145		858	0.00807024		911	0.031707		415	0.0441948
945	0.00731954		571	0.0084419		296	0.00637882		71	0.0191114		322	0.00806182		939	0.0316566		467	0.044188
422	0.00730174		396	0.00839259		940	0.00637648		1205	0.0190706		696	0.00805793		6	0.0316175		416	0.0439773
995	0.00728703		142	0.00839021		702	0.00631779		867	0.0188998		618	0.00799747		368	0.0314964		417	0.0437842
496	0.00725723		179	0.00838024		59	0.00628625		368	0.0188873		943	0.00798041		425	0.0311904		10	0.0437769
731	0.00725081		110	0.00834586		945	0.00627241		294	0.0188632		940	0.0079636		919	0.0311464		418	0.04372
307	0.00723205		560	0.00830487		70	0.00625404		1024	0.0187074		872	0.00795691		713	0.0310022		604	0.0436929
14	0.00718535		16	0.00818592		715	0.00618364		193	0.0187024		641	0.0079449		413	0.0309173		419	0.0435164
828	0.00717075		311	0.00817649		416	0.00616654		750	0.0186534		46	0.00792167		405	0.0306439		605	0.0434813
290	0.00716023		68	0.00804475		241	0.00616093		223	0.0184536		375	0.00789132		511	0.0305959		606	0.0434733
858	0.00714022		513	0.00801159		290	0.00615874		557	0.0184487		689	0.0078412		548	0.0305752		420	0.0434445
98	0.00713515		452	0.00799458		129	0.00615195		800	0.0184092		416	0.00783727		550	0.0305184		421	0.042987
462	0.0071255		114	0.0078484		422	0.00614033		1213	0.0183831		184	0.00780345		903	0.0303759		468	0.0429486
943	0.00712293		128	0.00778627		21	0.00613558		268	0.0182486		127	0.00775472		872	0.0303023		607	0.0429465
157	0.0071099		562	0.00777834		454	0.00611438		1250	0.0182349		972	0.00775149		703	0.0301854		422	0.042941
876	0.00709045		516	0.00772029		153	0.00608707		1151	0.018231		205	0.00775127		42	0.0299389		11	0.0429213
981	0.00707634		162	0.00764857		927	0.00606861		861	0.0182059		221	0.00774191		717	0.0296505		608	0.042461
353	0.00697995		564	0.0075448		1006	0.00599495		537	0.0181962		757	0.00772109		202	0.0292599		609	0.0424092
702	0.00697786		132	0.0075127		973	0.00593264		868	0.0181746		851	0.00769274		720	0.0290543		12	0.0423559
743	0.00694202		417	0.00748857		731	0.00592992		922	0.0180857		153	0.0076747		49	0.0289032		423	0.0422069
827	0.00687752		125	0.00745212		664	0.00590279		890	0.0179465		385	0.00762597		429	0.0288379		469	0.0421943
115	0.00685316		168	0.00740714		224	0.00589271		494	0.01786		581	0.00761767		206	0.0284966		424	0.0421507
909	0.00683516		241	0.00733379		166	0.00584169		1034	0.0177224		554	0.00760928		41	0.0283572		610	0.0421458
817	0.00679373		126	0.00732148		82	0.00582529		431	0.0177091		624	0.00759644		426	0.0283411		425	0.0421235
247	0.00679208		105	0.00718768		566	0.00581723		993	0.0176935		822	0.00757866		569	0.0282401		426	0.0421087
766	0.00678464		100	0.00710896		96	0.0058046		764	0.0176807		804	0.0075521		37	0.0282204		427	0.0420516
69	0.0067794		89	0.00703072		593	0.00574137		812	0.0175811		351	0.00753161		719	0.0278389		428	0.0420358
354	0.00676241		111	0.00698591		83	0.00569042		419	0.0173397		422	0.00746017		406	0.0276159		611	0.0420201
624	0.00675613		542	0.00678369		236	0.00568405		755	0.0172707		933	0.00745571		57	0.0275862		470	0.0418294
804	0.00674095		353	0.00672823		238	0.00567084		119	0.0172556		96	0.00741608		395	0.0273284		612	0.041787
807	0.00669975		400	0.00672556		746	0.00562843		1182	0.0172174		945	0.00735969		191	0.0271435		429	0.0416371
831	0.00664409		367	0.00671572		933	0.0055854		701	0.017142		656	0.00734121		567	0.0271086		471	0.0415907
652	0.0066052		535	0.00669544		464	0.00557391		620	0.0171253		399	0.00731411		563	0.0271022		472	0.0415692
579	0.00660417		131	0.00665798		883	0.00556696		38	0.017076		697	0.00729921		556	0.0270316		430	0.041391
733	0.0066021		121	0.006502		743	0.0054985		1119	0.0170139		519	0.00729326		5	0.0267963		473	0.0413411
593	0.0065274		604	0.00650153		154	0.00549719		807	0.0169378		733	0.00723065		52	0.0266397		431	0.0412836
376	0.00650019		411	0.00649176		760	0.00547447		797	0.0168987		863	0.00722263		423	0.0264795		432	0.0411522
343	0.00643968		263	0.00646501		656	0.00547285		482	0.0168784		847	0.00721954		552	0.026393		433	0.0409603
291	0.00643599		290	0.00621761		722	0.00547005		323	0.0168412		873	0.00721048		936	0.026252		474	0.0409083
551	0.0064113		38	0.00610586		245	0.00546562		1056	0.0168034		983	0.00716673		390	0.0261272		434	0.0408586
516	0.00640048		102	0.00595592		205	0.00541621		974	0.0167757		827	0.00713375		880	0.0259046		435	0.0408564
52	0.00639591		603	0.00581108		987	0.00534173		953	0.0166989		496	0.00711819		196	0.0255913		436	0.0408348
554	0.0063938		501	0.00576718		307	0.00532012		961	0.0166463		664	0.00708927		59	0.0255879		437	0.0408115
735	0.00637225		485	0.00574005		157	0.00531058		16	0.0165955		835	0.00705499		397	0.0255656		475	0.0407849
174	0.00636236		278	0.00569802		847	0.00528064		1157	0.0164439		981	0.00705434		913	0.0255404		13	0.0407445
611	0.00633749		221	0.00558627		497	0.00527251		615	0.0164173		86	0.00700975		203	0.0254243		14	0.040698
96	0.00632615		67	0.00551239		399	0.00526796		1227	0.016366		42	0.00700381		874	0.0252491		438	0.0406032
323	0.0063063		640	0.00543933		291	0.0052585		27	0.0163624		285	0.00700053		570	0.0250914		439	0.0405697
248	0.00630135		478	0.00541745		23	0.00524801		17	0.0162909		671	0.00696832		207	0.0250273		440	0.0404439
1006	0.00628511		608	0.00540686		671	0.00524396		238	0.0162909		1008	0.00694872		920	0.0248966		476	0.0403286
336	0.00623029		647	0.00537396		1011	0.00522259		657	0.0162369		330	0.00692699		34	0.0248551		441	0.0402248
26	0.00622419		119	0.00529494		130	0.00521576		80	0.0161484		734	0.00692548		195	0.0242817		442	0.0401839
715	0.00621768		215	0.00516765		613	0.00515582		138	0.0161062		69	0.00683843		935	0.0242145		443	0.0400957
912	0.00621413		283	0.00507996		45	0.00514822		998	0.0160472		525	0.00683146		209	0.0240832		444	0.0400909
386	0.00620285		407	0.00507681		805	0.00511787		467	0.0160127		174	0.00679219		404	0.0238938		477	0.0400798
435	0.00611094		133	0.00506253		951	0.00504935		179	0.0159339		516	0.00674997		394	0.023866		445	0.0400041
879	0.00610914		109	0.00505209		740	0.00504313		104	0.015807		433	0.00674899		528	0.0235659		478	0.0399952
454	0.00607638		199	0.00487722		116	0.0049645		283	0.0157598		154	0.00673318		932	0.0232316		479	0.0399848
977	0.00607124		134	0.00482654		498	0.00496069		1187	0.0157118		807	0.00672334		438	0.0231974		480	0.039914
358	0.0060304		490	0.00482558		530	0.00495386		734	0.0155771		89	0.00671306		700	0.0230134		15	0.0399129
294	0.00602945		577	0.00482506		828	0.00494383		918	0.015537		735	0.00670876		553	0.022925		446	0.0398189
42	0.00602148		555	0.004793		840	0.00489643		1158	0.0154113		859	0.00668982		937	0.0229002		481	0.0397866
433	0.00601261		346	0.00478264		801	0.00486879		155	0.0152703		359	0.00662604		205	0.0227003		482	0.0396508
445	0.00599903		192	0.0047654		437	0.00474746		923	0.0151854		684	0.00660367		992	0.0221964		16	0.0395856
541	0.00596075		72	0.00476341		626	0.00472944		1238	0.0151464		584	0.00659141		915	0.0221878		483	0.0393314
46	0.00595806		469	0.00475921		611	0.00471172		388	0.0150949		183	0.00658197		948	0.0219963		17	0.0393115
544	0.00591032		521	0.0047192		684	0.00470557		705	0.0150405		553	0.00658001		515	0.0219778		447	0.0392076
441	0.00587978		511	0.00469725		246	0.00470449		1031	0.0149856		364	0.00657888		419	0.0218981		18	0.0391838
76	0.00587452		668	0.00464934		756	0.00467463		703	0.0149577		907	0.0065738		519	0.0218207		484	0.0391728
112	0.00584029		445	0.0046444		98	0.00467147		175	0.0149034		363	0.00656223		694	0.021648		485	0.0390456
991	0.00582464		633	0.00459769		995	0.00463834		305	0.0148864		435	0.00644732		908	0.0213412		486	0.0390345
31	0.00580171		145	0.00456315		791	0.00461061		1231	0.0146484		294	0.00644566		929	0.0206909		448	0.0390103
740	0.00579108		359	0.00446302		886	0.00456382		646	0.0146206		699	0.00644532		924	0.0205184		449	0.0389663
477	0.0056868		450	0.00442782		414	0.00453792		153	0.0145826		831	0.00641575		58	0.0204479		450	0.0389309
476	0.00563973		654	0.00439942		1017	0.00453441		920	0.0145086		542	0.00640159		420	0.020435		487	0.0388224
791	0.00562118		80	0.00439393		627	0.0045026		785	0.0143738		877	0.0063659		9	0.0201759		613	0.0384512
833	0.00559258		570	0.00432305		46	0.00449112		577	0.0141476		995	0.00635087		188	0.0201348		488	0.0384278
727	0.00557532		410	0.00432124		844	0.0044546		463	0.0141429		462	0.00631577		905	0.0200972		614	0.038405
861	0.00556008		163	0.00430812		821	0.00444436		740	0.0140238		469	0.00627043		43	0.0200277		19	0.0383532
11	0.005559		212	0.00430224		808	0.00441816		233	0.0140117		26	0.00612972		417	0.0196293		20	0.0383356
553	0.00553985		363	0.00429313		385	0.00441419		36	0.0140031		247	0.00611292		55	0.0196244		615	0.0380303
618	0.00553857		470	0.00426837		174	0.00441129		410	0.0139806		157	0.00607868		422	0.0193342		489	0.0379045
71	0.00552432		416	0.00416846		554	0.00440656		848	0.0139356		703	0.00604668		934	0.019171		616	0.0377095
281	0.00550285		482	0.00412206		360	0.00436427		218	0.0138516		414	0.00603815		445	0.0190882		21	0.037518
680	0.00546477		178	0.00408288		283	0.00433737		863	0.0138516		115	0.00601543		56	0.0189998		22	0.0374094
89	0.00544869		3	0.00408099		196	0.00432419		1165	0.0138403		752	0.00597631		454	0.0187988		23	0.0370927
471	0.00541456		313	0.00407931		628	0.00427457		278	0.0138376		579	0.0059733		433	0.0186866		24	0.0369471
734	0.00534908		528	0.00407066		14	0.00419648		719	0.0138013		909	0.00595964		18	0.0185043		25	0.0368849
997	0.00534815		454	0.00406174		326	0.00417614		357	0.0136521		98	0.00595702		375	0.0184818		490	0.0368639
481	0.00534		477	0.00401674		1003	0.00417523		1259	0.0135904		844	0.00588222		878	0.0184763		617	0.0367201
285	0.00529658		463	0.0039989		508	0.00417019		134	0.0135851		290	0.00587312		435	0.0184581		491	0.036463
1008	0.00528086		449	0.00396448		549	0.00415592		535	0.0135754		680	0.00587211		899	0.0184183		618	0.0364408
883	0.00527108		150	0.00358412		127	0.00415017		935	0.0135653		692	0.0058437		930	0.0183985		492	0.0363857
238	0.00524702		481	0.00356657		625	0.00414868		1223	0.0133952		58	0.00583814		371	0.0183649		493	0.0363778
154	0.005208		483	0.00352332		706	0.00409152		372	0.0132767		131	0.00583265		559	0.0183281		619	0.0363622
596	0.00518415		656	0.00352053		1019	0.00407935		1160	0.0131942		1006	0.00579199		512	0.0182208		26	0.0363118
57	0.00517332		466	0.00348706		641	0.00405647		794	0.0131667		57	0.00577759		940	0.0182147		494	0.0362857
37	0.00516836		448	0.00345442		997	0.00405377		237	0.0131639		383	0.005751		441	0.0181383		620	0.0362556
814	0.00516556		170	0.00340532		955	0.00401393		313	0.0131406		248	0.00573155		210	0.0179001		621	0.0362371
863	0.00516124		514	0.00335068		608	0.00401327		1109	0.0131219		71	0.00573073		554	0.0178622		495	0.0359012
684	0.00510423		304	0.00334402		981	0.00400878		1106	0.013117		806	0.0057215		917	0.0176612		496	0.0356769
127	0.00510314		141	0.00333999		1015	0.00399762		404	0.0130863		977	0.005718		483	0.0172861		497	0.035559
584	0.00508087		220	0.00330309		313	0.00398577		514	0.0130401		870	0.00571767		946	0.0172613		622	0.0355563
896	0.00503294		104	0.00329565		227	0.00396085		1060	0.012973		986	0.0057057		933	0.0172119		623	0.0351756
978	0.00498784		223	0.00328491		281	0.00393921		731	0.0129361		764	0.00568461		960	0.0171388		498	0.0351038
45	0.00497703		442	0.00324558		493	0.00387309		1046	0.0129114		323	0.00567568		544	0.0171052		499	0.0348444
467	0.00497607		509	0.00319746		1002	0.00387222		314	0.0129056		693	0.00562306		44	0.0170767		500	0.0348021
257	0.00497486		619	0.00319029		295	0.00384302		601	0.0128421		524	0.00557647		50	0.017061		624	0.0346911
608	0.00495429		166	0.00314604		972	0.00383951		395	0.0126794		978	0.00557525		190	0.0169935		625	0.0344665
34	0.00486291		652	0.00314217		276	0.00383208		160	0.0126082		135	0.00556044		48	0.0169502		501	0.0343667
101	0.00484831		675	0.00312035		289	0.00375833		804	0.0124708		613	0.00555807		516	0.0168035		502	0.0343198
925	0.00482852		106	0.00310038		76	0.00373466		401	0.0124298		441	0.00549905		437	0.016654		27	0.0343195
664	0.00478951		488	0.00306643		336	0.00369165		287	0.0123925		914	0.00546821		389	0.0166354		503	0.0342906
951	0.00478898		464	0.0030625		573	0.00369073		363	0.0123695		223	0.00545025		926	0.0166208		28	0.034287
227	0.00476694		158	0.00305763		1005	0.00368733		292	0.0123514		445	0.00542805		551	0.0165487		626	0.0342313
131	0.0047327		467	0.00295717		581	0.00366767		166	0.0123136		551	0.00539843		568	0.0163529		504	0.0336417
613	0.00472663		107	0.00293034		29	0.00366275		687	0.0122		611	0.0053845		402	0.0161572		505	0.0335859
834	0.00468412		557	0.0028356		823	0.0036573		1221	0.0121875		997	0.00535675		388	0.016116		29	0.0335086
524	0.00464992		409	0.00283051		315	0.00364623		552	0.0121737		471	0.00530244		904	0.0160583		627	0.0334145
337	0.00461229		408	0.00282499		766	0.00362489		914	0.0120862		736	0.00526058		566	0.015947		30	0.0332724
383	0.00457595		269	0.00281481		375	0.00362351		249	0.0119964		833	0.00522551		943	0.0158736		506	0.0329225
475	0.00455423		362	0.0027155		907	0.00360864		86	0.0119873		356	0.0051495		945	0.0158623		507	0.0326933
805	0.00454393		455	0.0026837		195	0.00360832		290	0.0118781		675	0.00514481		187	0.0157923		31	0.0326202
870	0.00454107		388	0.0026732		22	0.00360235		1207	0.0118502		912	0.00513578		753	0.0152595		32	0.0326032
39	0.00452264		264	0.0026275		510	0.00359615		746	0.0117928		53	0.0051213		751	0.0150622		33	0.0324399
764	0.00446445		52	0.00261173		800	0.00359472		1	0.0117397		11	0.00511261		555	0.015033		34	0.0323906
217	0.00446227		24	0.00259957		252	0.00357228		116	0.0116614		460	0.00510109		376	0.0149452		628	0.0323878
625	0.00444738		19	0.00253153		855	0.00356743		681	0.0114759		636	0.0050317		453	0.0149218		629	0.0323371
276	0.0044458		53	0.00248079		1014	0.00354775		1040	0.0114051		386	0.00499042		385	0.0148454		630	0.0323332
886	0.004443		227	0.00246612		270	0.00353916		813	0.011383		556	0.00498983		396	0.0148326		631	0.0322632
460	0.004376		505	0.00246394		983	0.00350758		843	0.0113223		38	0.00493173		482	0.0147899		508	0.032217
801	0.00434867		476	0.00246186		675	0.00348404		416	0.011304		276	0.0049207		450	0.0147479		35	0.0320843
437	0.00434346		318	0.00245338		1020	0.00345535		479	0.0112816		389	0.00491883		387	0.0145634		632	0.0320063
206	0.00433039		138	0.00244505		621	0.00343845		1241	0.0111158		336	0.00489239		916	0.014471		509	0.0318855
1002	0.00430993		57	0.002444		221	0.00343237		164	0.0110824		467	0.00476944		383	0.0143525		633	0.0318506
356	0.00430868		146	0.00241358		812	0.00339674		768	0.0110821		477	0.00475142		906	0.0143079		510	0.0318214
9	0.00425121		165	0.002332		758	0.00337162		219	0.0110749		874	0.00473893		560	0.0143017		36	0.0317162
385	0.00424636		167	0.00231268		58	0.00333425		530	0.0108678		329	0.00472114		452	0.0141081		511	0.0316247
1000	0.00423788		395	0.00223633		135	0.00331367		1102	0.0108549		1002	0.00470564		897	0.0140824		634	0.0315133
706	0.0042042		123	0.00213319		553	0.00329099		89	0.0108471		1003	0.00470297		693	0.0140349		635	0.031387
839	0.00419781		20	0.00204814		311	0.00327445		243	0.010839		497	0.00469238		752	0.0140049		512	0.0313525
221	0.00418422		506	0.00204309		546	0.00327097		349	0.0107206		866	0.00468818		773	0.013919		636	0.0313482
675	0.00416327		487	0.00202761		867	0.00327057		1175	0.0107025		327	0.0046808		431	0.0138649		637	0.0313404
767	0.00414534		108	0.00199579		73	0.0032664		904	0.0106775		791	0.00467284		414	0.0138377		638	0.0310773
348	0.00412192		261	0.00194366		469	0.00326075		8	0.0106761		727	0.00465108		900	0.0138162		513	0.0310007
111	0.0041024		607	0.00185125		518	0.0032499		75	0.010379		608	0.00465027		758	0.0137362		514	0.0308537
327	0.00409584		558	0.00184971		909	0.00324264		43	0.010356		217	0.00463063		774	0.0137255		515	0.0308526
868	0.00406247		443	0.00184144		217	0.00322344		221	0.0103168		232	0.0046298		718	0.0136542		516	0.0306466
699	0.00405595		559	0.00183202		111	0.00321365		489	0.0103121		493	0.00459832		399	0.0136401		517	0.0306374
72	0.00404391		120	0.00182652		584	0.00320362		709	0.0102737		281	0.00458807		432	0.0135872		639	0.030635
494	0.00403421		135	0.00181532		453	0.00318312		783	0.0102446		257	0.00458781		756	0.0135098		640	0.0305702
859	0.00403115		682	0.00181253		733	0.00315779		477	0.0101957		659	0.00455448		772	0.0134482		37	0.030314
682	0.00401743		446	0.00178272		669	0.0031492		1095	0.0101927		283	0.00455052		757	0.0133503		641	0.0302612
1003	0.00401669		510	0.00177213		112	0.00314185		426	0.0101578		475	0.00451979		760	0.0133385		518	0.0302084
470	0.00401558		265	0.00176031		822	0.00313199		201	0.0100893		348	0.00451919		764	0.0132718		519	0.030207
636	0.00400241		140	0.00171991		964	0.00312209		57	0.0100482		596	0.00449441		755	0.0131401		642	0.0300679
265	0.00400084		156	0.00169035		265	0.00309283		939	0.0100362		72	0.00447819		768	0.0130477		520	0.0299468
389	0.00398056		217	0.00168113		810	0.00309247		599	0.0100061		507	0.00447317		763	0.0130341		521	0.0298597
643	0.00396096		609	0.00167366		659	0.00307623		124	0.00996192		9	0.00446526		692	0.0128664		522	0.0298205
450	0.00395813		612	0.00166739		697	0.00306142		284	0.0099617		450	0.00445739		766	0.0128414		523	0.0297299
135	0.0039417		139	0.00165835		492	0.00303824		593	0.00994791		893	0.0044539		759	0.0128154		643	0.0296355
463	0.00392451		309	0.00164562		977	0.00301451		673	0.00993515		965	0.00445147		761	0.012806		38	0.0296218
505	0.00391677		144	0.00164104		101	0.00300531		647	0.00988521		951	0.00444067		416	0.012805		524	0.0296179
41	0.00390633		508	0.00162268		431	0.00298543		51	0.00977797		291	0.00439187		754	0.0128038		644	0.029609
866	0.00389345		459	0.00161699		525	0.00297588		1032	0.0097577		250	0.00435917		765	0.0127881		645	0.0296022
696	0.00389221		462	0.00159452		914	0.00295848		915	0.00975591		498	0.00434764		769	0.0127849		525	0.0294951
752	0.00389031		480	0.00157596		680	0.0029416		521	0.00967486		626	0.00434646		770	0.0127149		646	0.0294874
223	0.00385309		171	0.00156491		950	0.00293795		969	0.00960253		505	0.00434539		767	0.0126991		647	0.0294679
556	0.00384037		423	0.00153654		449	0.00291534		285	0.00959114		238	0.00432461		762	0.0126586		648	0.0294614
552	0.00383289		474	0.0014958		432	0.0028806		584	0.0095896		463	0.00428057		951	0.012658		526	0.0294587
129	0.00382157		339	0.00149129		551	0.00287709		686	0.00955362		770	0.00426833		771	0.012512		649	0.0294455
453	0.00376109		59	0.00146727		727	0.00287609		165	0.00953966		780	0.00424768		886	0.0123982		527	0.0294027
151	0.00373488		234	0.00141742		978	0.00287201		110	0.00953113		324	0.00422089		776	0.0121502		528	0.0291894
196	0.00373285		499	0.00138763		151	0.00286255		849	0.00951979		681	0.00419248		518	0.0121399		650	0.0291813
387	0.0037254		605	0.00138754		734	0.00284569		879	0.00951788		861	0.00417945		562	0.0120516		529	0.0291745
183	0.00371002		118	0.00138108		780	0.00284512		293	0.00948941		151	0.00416308		775	0.0120269		651	0.0291517
289	0.00370097		248	0.00137917		312	0.00283935		835	0.0094713		881	0.00408148		780	0.0119233		530	0.0291177
955	0.00369802		626	0.00137207		297	0.00283425		611	0.00946964		318	0.00407128		777	0.0117207		39	0.0290422
893	0.00368896		451	0.00136516		877	0.00283221		1002	0.00944893		755	0.00404317		881	0.0116714		40	0.0290255
317	0.00366704		216	0.0013547		986	0.00280419		409	0.00938669		41	0.00401397		779	0.011571		41	0.0288979
659	0.00363537		361	0.00132941		556	0.00280186		1120	0.00935819		694	0.00401004		434	0.0114854		42	0.0288895
1011	0.00362648		17	0.00130937		316	0.00280011		232	0.00934448		970	0.00399348		955	0.0114456		43	0.0288668
1005	0.00361915		147	0.00130317		836	0.00279818		717	0.00934038		296	0.00396904		565	0.0113761		531	0.0288219
375	0.00361638		65	0.00130263		118	0.00275451		906	0.00933106		437	0.00396379		372	0.0113318		44	0.0286749
639	0.00359976		276	0.00124303		105	0.00274523		1144	0.0093003		304	0.00392893		778	0.0112619		652	0.0286297
493	0.00358429		403	0.00121809		287	0.00274359		1242	0.00920426		476	0.00392263		883	0.0112158		653	0.0286007
928	0.00357425		402	0.00114048		232	0.0027287		666	0.00916073		101	0.00391943		478	0.011204		532	0.028549
872	0.00356528		127	0.00113528		86	0.00270371		177	0.00915069		569	0.00391694		8	0.0110934		533	0.0285207
881	0.0035564		465	0.00108468		383	0.00269018		865	0.00904589		265	0.00390776		927	0.011063		654	0.0284579
621	0.00355106		486	0.00107433		131	0.00267459		944	0.00890758		492	0.00386947		893	0.010852		45	0.0284141
627	0.00352791		66	0.00106873		298	0.00265515		678	0.00890145		643	0.00385994		51	0.0106811		534	0.028403
806	0.00350077		214	0.0010464		912	0.00261442		986	0.0088918		723	0.0038548		898	0.0104244		655	0.0283047
195	0.00349768		137	0.00103792		142	0.00258533		1070	0.00885803		762	0.00383538		534	0.0103108		656	0.028143
681	0.00344222		325	0.00102347		57	0.0025641		183	0.00881932		116	0.00382352		449	0.0102494		535	0.0281115
203	0.003408		657	0.000988		1000	0.00253483		608	0.00880413		1011	0.00381644		243	0.0101471		657	0.0280177
191	0.00339661		475	0.000988		214	0.00252863		583	0.00875025		767	0.00381344		47	0.0101457		658	0.0279936
770	0.00333515		554	0.000874		723	0.00251582		245	0.00871396		1005	0.00379239		386	0.0099541		659	0.0279612
334	0.003328		364	0.000849		471	0.00251141		656	0.00865789		270	0.00376731		208	0.00994101		660	0.027903
161	0.00332333		473	0.000819		735	0.00250985		527	0.00865598		813	0.00371607		696	0.00985033		536	0.0278428
716	0.00332127		415	0.000816		509	0.00249896		42	0.00864538		834	0.00369507		10	0.00976285		46	0.027832
990	0.00331764		130	0.000814		89	0.00248027		772	0.00862284		625	0.00368644		241	0.00973326		47	0.0278095
53	0.00330442		360	0.000762		757	0.00246405		53	0.00855924		991	0.00366305		699	0.00964597		48	0.0278093
763	0.00329208		447	0.000753		462	0.00245889		101	0.00851847		112	0.00365388		914	0.00963319		661	0.0276733
205	0.00327993		117	0.000674		827	0.00243747		96	0.00846649		552	0.00358428		947	0.00962509		49	0.0276533
800	0.00325553		461	0.000665		42	0.0024106		1018	0.00845738		722	0.00356728		24	0.00959542		662	0.0276031
498	0.00324981		266	0.000637		53	0.00239897		1111	0.0084493		826	0.00355704		457	0.00954054		663	0.0275696
485	0.00324551		21	0.000625		991	0.00238802		394	0.008399		314	0.00354375		907	0.00944545		50	0.0274986
970	0.00323459		297	0.00062		337	0.00236304		1196	0.00838044		925	0.00353285		264	0.00928856		664	0.0274387
283	0.00321753		374	0.000584		26	0.00235722		619	0.00828808		387	0.00353194		184	0.00919213		51	0.0274118
160	0.00321686		507	0.000565		524	0.00234799		931	0.00818652		563	0.00351519		869	0.00917806		52	0.0273929
58	0.00321158		185	0.000553		110	0.00232949		197	0.00817786		950	0.00350719		870	0.00904342		537	0.0272645
964	0.00316173		493	0.000547		223	0.00230903		597	0.00815134		646	0.00348366		447	0.00901516		665	0.0272163
507	0.00314813		332	0.000454		247	0.0022586		796	0.00804372		289	0.0034648		993	0.00898781		53	0.0272067
36	0.00314114		661	0.000453		703	0.00225841		733	0.00798715		627	0.00344904		263	0.00898687		54	0.0269982
722	0.00312634		444	0.000452		563	0.00224484		589	0.00797513		455	0.00343888		843	0.00896869		55	0.0269854
826	0.00310912		472	0.000422		40	0.00223921		739	0.0079306		191	0.00342969		461	0.00894735		538	0.0268869
810	0.00308577		479	0.000406		288	0.00221213		231	0.00791422		801	0.00342967		842	0.00886711		56	0.026885
542	0.00308435		456	0.000396		301	0.00219799		1235	0.00786391		1000	0.00341045		841	0.00879569		666	0.0268747
295	0.00306166		124	0.000355		386	0.00213841		916	0.00781823		454	0.00340964		262	0.00872096		667	0.0268399
980	0.00305294		18	0.000343		216	0.0021197		1105	0.00780149		840	0.00337173		846	0.00868429		668	0.0268174
492	0.00304706		358	0.000339		477	0.00210516		440	0.00777231		628	0.00334922		242	0.0086782		57	0.0267251
723	0.00300875		489	0.000296		211	0.00209832		754	0.00776894		317	0.00330809		430	0.00857558		58	0.0265698
965	0.00299941		60	0.000281		949	0.00204471		726	0.00766725		896	0.00329687		501	0.00857077		59	0.0265652
628	0.00299477		15	0.000246		947	0.00204325		235	0.0075623		955	0.00329337		245	0.00856151		539	0.0265487
549	0.00296443		115	0.000219		160	0.00204206		1093	0.00754895		142	0.00328404		258	0.00855421		60	0.0264733
110	0.00293109		136	0.000203		725	0.0020298		638	0.00753528		337	0.00326118		848	0.00850499		669	0.0263212
855	0.00292959		122	0.000153		732	0.00201919		103	0.0075248		805	0.00324321		845	0.00850458		61	0.0262959
622	0.00291467		460	0.000152		500	0.00201455		629	0.0074655		621	0.00320228		850	0.00848929		670	0.0262784
780	0.00291334		563	0.000148		494	0.0020134		671	0.00745333		371	0.00318947		868	0.00837757		540	0.026278
867	0.00290741		116	0.000127		811	0.00200472		917	0.00740648		206	0.00318867		246	0.0083704		541	0.02626
452	0.0029059		262	0.000125		633	0.00199998		1219	0.0073302		966	0.00318161		867	0.00835897		542	0.0262487
250	0.0028751		143	0.000114		467	0.00199759		297	0.00729269		203	0.00318041		852	0.00835578		62	0.0261531
950	0.00287134		129	8.57e-05		161	0.00199704		108	0.00728262		36	0.00317648		244	0.00832579		543	0.0260136
130	0.0028703		213	7.2e-05		893	0.00199433		1173	0.00727254		583	0.00314874		856	0.00831121		63	0.0260086
985	0.00283152		591	7.1e-05		248	0.00198182		652	0.00726921		470	0.00311588		847	0.00830258		64	0.0260049
762	0.00282835		113	4.78e-05		596	0.00195702		356	0.00724395		111	0.00311187		844	0.00825509		544	0.025913
431	0.00282353		31	4.62e-05		568	0.00195554		286	0.00721491		568	0.00310817		949	0.0082471		545	0.025839
324	0.00279057		103	3.9e-05		11	0.00195251		475	0.00720919		468	0.00309746		265	0.00822021		671	0.0257914
371	0.00278232		314	3.62e-05		71	0.00193454		943	0.00711011		500	0.00309345		260	0.00821745		672	0.025734
70	0.00275916		164	2.3e-05		764	0.00193197		664	0.00707681		586	0.00305396		942	0.0081828		546	0.0257216
158	0.00273958		211	1.42e-05		925	0.00192211		555	0.00704265		75	0.00304139		248	0.00815728		547	0.0257194
207	0.00273937		458	7.6e-06		663	0.00190406		1048	0.00699942		129	0.00303833		866	0.00814917		548	0.0256577
540	0.0026849		556	2.08e-06		681	0.00190202		37	0.00697514		639	0.00303796		964	0.0081373		549	0.0256191
363	0.00268342		101	1.08e-06		865	0.00188721		289	0.00691286		481	0.00302118		864	0.00813049		550	0.0255163
873	0.00267357					370	0.00187616		48	0.00686597		287	0.00302009		1007	0.00809994		65	0.0254754
432	0.0026451					162	0.00187288		791	0.00682608		105	0.00296366		256	0.00805602		551	0.0254631
626	0.00264023					38	0.00187153		977	0.00674173		160	0.00295645		247	0.00800238		673	0.0254091
1015	0.00264016					752	0.00187034		273	0.00664306		39	0.0029564		259	0.00799946		66	0.0254063
16	0.00260716					355	0.00185393		438	0.00659326		161	0.00292477		860	0.00799482		674	0.0253266
38	0.00260709					481	0.00184564		875	0.00656419		207	0.00291832		382	0.00797282		552	0.0252599
811	0.00256885					729	0.00183873		1039	0.0065627		128	0.0029016		459	0.00793388		675	0.0251618
947	0.00256023					965	0.00182737		490	0.00655643		765	0.00290078		854	0.00790991		67	0.0251549
962	0.00255802					447	0.00182163		174	0.00650344		544	0.00289037		862	0.00790495		553	0.0251526
812	0.00255389					266	0.00180839		34	0.00647649		682	0.00288654		266	0.00790445		554	0.0251106
701	0.00255267					813	0.00179575		1185	0.0064633		431	0.00288016		853	0.00784334		68	0.0250847
563	0.00255234					569	0.00179325		1068	0.00643455		1017	0.00285696		851	0.00784235		69	0.0250642
455	0.00253777					334	0.00176189		41	0.00639626		980	0.00284066		261	0.0077248		70	0.0250601
583	0.00252361					1018	0.00172888		1178	0.00634761		456	0.00283021		857	0.0076882		555	0.0249172
676	0.00249924					799	0.00172442		109	0.00633119		663	0.00281847		858	0.00768774		556	0.0249006
468	0.00243022					504	0.00172364		520	0.00625591		472	0.00277941		249	0.00765699		676	0.0248483
765	0.00242265					770	0.00172218		492	0.00622811		701	0.0027405		558	0.00762767		677	0.0247385
755	0.00241917					325	0.00171588		200	0.00613528		432	0.00270508		257	0.00762675		557	0.0247217
209	0.00241532					357	0.00169483		347	0.0061112		1015	0.00270231		996	0.00762001		558	0.0246778
142	0.00236519					475	0.00168421		430	0.00607607		985	0.00266973		865	0.00761275		678	0.024633
865	0.00233682					108	0.00164452		827	0.0060451		548	0.00261032		439	0.00760101		559	0.0244448
1017	0.00233594					389	0.00164092		246	0.00602985		16	0.0025853		250	0.00759093		679	0.0244241
536	0.00233319					485	0.00160158		1052	0.00600726		800	0.00257041		859	0.00758838		71	0.0242636
747	0.00233004					463	0.00159997		876	0.00598186		130	0.00255506		909	0.00757093		680	0.0242323
646	0.00232128					460	0.00157888		612	0.00591658		570	0.00255322		254	0.00756827		560	0.0240953
813	0.00232102					219	0.00157887		672	0.0058721		244	0.0025402		270	0.00756036		681	0.0240743
570	0.0023006					173	0.00157521		451	0.00582778		928	0.00253943		861	0.00754136		682	0.0240636
232	0.00228967					206	0.00153197		782	0.0057999		812	0.00253388		863	0.00752347		561	0.0240273
500	0.00227798					643	0.00153032		738	0.00578734		334	0.00252926		882	0.00752271		683	0.0240149
761	0.00225898					646	0.00152547		1258	0.00576166		808	0.00252799		252	0.00752005		562	0.024012
472	0.00225847					257	0.00151303		326	0.00572709		70	0.00248203		267	0.00748125		684	0.0240031
713	0.00225186					736	0.00150905		194	0.00569072		508	0.00245168		896	0.00744564		685	0.0239845
1019	0.00222658					835	0.00150794		737	0.00566691		698	0.00244271		269	0.00737764		686	0.0239768
669	0.00221354					503	0.00150534		992	0.00564325		947	0.00243398		849	0.00737238		563	0.0239444
155	0.00221194					957	0.00149045		465	0.00561397		110	0.00243293		877	0.00731611		687	0.0239425
244	0.00220858					721	0.00148523		320	0.00553691		485	0.00240088		251	0.007311		564	0.023938
497	0.00218078					1013	0.00148255		359	0.00553257		730	0.00239753		855	0.00726088		565	0.0239345
87	0.0021724					478	0.00145264		481	0.00546646		761	0.00238853		54	0.00725169		72	0.0239235
569	0.00215203					640	0.00144172		276	0.00545427		494	0.00236771		998	0.00724532		73	0.0238913
837	0.00213221					962	0.00144128		715	0.00542696		763	0.00235594		912	0.00714581		566	0.023841
270	0.00210845					726	0.00143579		723	0.00542121		34	0.00234819		255	0.00710148		688	0.0238028
105	0.00209754					748	0.00142277		301	0.0054208		540	0.00234402		253	0.00709999		74	0.0238027
30	0.00209456					881	0.00141763		1092	0.00542047		288	0.00233979		486	0.0070296		567	0.0237347
440	0.00208421					434	0.00139049		545	0.00541768		1019	0.00232984		421	0.00697715		568	0.0236787
698	0.00205142					367	0.00138989		860	0.00540649		209	0.00231175		268	0.0068857		689	0.0236456
634	0.00204313					928	0.00136397		21	0.00537467		162	0.0022869		428	0.00684882		690	0.0236412
693	0.00203708					41	0.00136247		418	0.00536412		747	0.00228622		802	0.00680299		75	0.0236367
736	0.00202215					452	0.00134225		903	0.00532536		990	0.00227511		957	0.00677193		691	0.0236082
966	0.00201863					682	0.00133557		817	0.0053163		661	0.00226483		183	0.00676581		76	0.0235981
663	0.00201457					831	0.00131694		644	0.00526125		536	0.0022284		513	0.00672422		77	0.0235397
808	0.0019665					470	0.00131619		667	0.00525315		12	0.00222418		458	0.00666337		78	0.0234901
539	0.0019524					8	0.00131603		423	0.00524503		669	0.00219107		962	0.00666226		692	0.0234687
304	0.00195025					203	0.00131504		424	0.0052384		676	0.00215247		925	0.00664556		693	0.0234147
75	0.00192636					177	0.00130953		714	0.00523293		520	0.00213144		789	0.0066239		694	0.0233602
296	0.00191551					970	0.001308		255	0.00519647		855	0.00211601		797	0.00661309		79	0.0232391
703	0.00191405					304	0.00130093		1007	0.00519557		254	0.00206348		443	0.00657101		80	0.0232329
116	0.00190983					476	0.00129706		929	0.00518532		634	0.00206123		442	0.00656257		695	0.023148
287	0.00190808					880	0.00127629		982	0.00517524		1014	0.00204338		451	0.00639923		81	0.0231457
518	0.00187158					207	0.00127222		502	0.00515953		249	0.00203817		331	0.0063173		696	0.0230109
184	0.00186699					158	0.00127038		1218	0.00513373		440	0.00203654		557	0.00631684		82	0.0229238
415	0.00184929					155	0.00126519		1029	0.00512643		7	0.00203148		373	0.00628373		83	0.0229163
568	0.00184711					250	0.00126288		1229	0.00510537		87	0.00201848		799	0.006217		569	0.0229015
661	0.00184515					455	0.00126232		921	0.0051047		837	0.00199807		999	0.00621293		697	0.0228878
567	0.00181353					661	0.0012521		462	0.00508507		984	0.00198739		800	0.00614942		84	0.0228837
456	0.00180508					622	0.00124717		46	0.00505434		295	0.00197804		801	0.00614799		698	0.0228779
225	0.00179423					980	0.00124344		1122	0.00500603		266	0.00197489		561	0.00614008		570	0.0228008
303	0.00178783					963	0.00121189		262	0.00497487		839	0.00197303		292	0.00611236		571	0.0227355
301	0.00177908					339	0.00121144		102	0.00494958		108	0.00196644		332	0.00602666		85	0.0227318
239	0.00177189					700	0.00119746		1054	0.00490448		949	0.00194167		488	0.00602038		572	0.0227308
7	0.00174736					552	0.00118103		64	0.00489894		713	0.00193117		340	0.00601314		573	0.0227174
849	0.0017405					305	0.00117622		968	0.00486994		838	0.00191458		3	0.00596814		574	0.0226675
586	0.00169829					191	0.00117267		1171	0.00482905		158	0.00190757		781	0.00596591		575	0.0226184
942	0.0016596					506	0.00116938		1156	0.00482767		716	0.00189967		342	0.00595126		86	0.0226034
288	0.00161903					387	0.00114966		79	0.00479956		30	0.00188366		415	0.00592459		87	0.0225868
949	0.0016182					544	0.00113207		26	0.0047814		567	0.00187266		335	0.00586597		576	0.0225
171	0.00161776					107	0.00112962		472	0.00476472		225	0.00184905		941	0.00582555		577	0.0224951
118	0.00161375					345	0.00112183		883	0.00476303		549	0.00183558		788	0.0058247		578	0.0224696
162	0.00160734					896	0.00106466		1170	0.00474976		448	0.00183095		333	0.00580694		579	0.0224632
1004	0.00159557					484	0.00106252		444	0.00447271		776	0.00183011		487	0.00580073		580	0.0224567
897	0.00159087					942	0.00104724		303	0.00445291		824	0.00181901		346	0.0057843		88	0.0224379
321	0.001589					468	0.00103357		528	0.00441848		118	0.00180803		791	0.00577569		89	0.0223824
1014	0.00156728					178	0.0010282		392	0.0043982		539	0.00180389		279	0.00576623		90	0.02238
582	0.00156515					959	0.00101985		1118	0.00436463		453	0.00180127		805	0.00576409		581	0.0223151
147	0.00154366					776	0.000983		61	0.00435164		573	0.00177692		885	0.00576026		91	0.0223008
128	0.00153276					300	0.000976		3	0.00432985		638	0.00177612		344	0.00572184		92	0.0222684
254	0.00153228					502	0.000972		660	0.00431302		155	0.0017611		338	0.00571993		582	0.0222652
548	0.00152082					240	0.000966		1063	0.00427596		484	0.00174908		336	0.0056629		699	0.0222563
600	0.00151068					966	0.000962		509	0.00423368		961	0.00174565		798	0.00566223		93	0.0222179
169	0.00150995					253	0.000962		770	0.00418093		176	0.00173995		564	0.00565822		583	0.0222151
249	0.00150242					797	0.000955		1249	0.00417012		242	0.00170933		963	0.00565577		584	0.0221671
268	0.00146758					10	0.000951		365	0.00414899		717	0.00170871		288	0.00562445		94	0.022126
573	0.00145436					570	0.000931		1123	0.00410101		171	0.00170844		287	0.00562301		585	0.0220674
12	0.00144511					676	0.00093		152	0.00408484		1020	0.00167339		444	0.00561765		586	0.0220625
[truncated: 481 more rows]

## Sheet: Table S2 (A)
Table S2. (A) Gold Yeast
[truncated: 901 more rows]

[truncated: 5 more sheets: Table S2 (B), Table S2 (C), Table S2 (D), Table S3, Table S4]
